# Supplementary material for: Rare, functional, somatic variants in gene families linked to cancer genes: GPCR signaling as a paradigm
Source: Springer Nature journal article supplement (doi:10.1038/s41388-019-0895-2), 2019-07-23

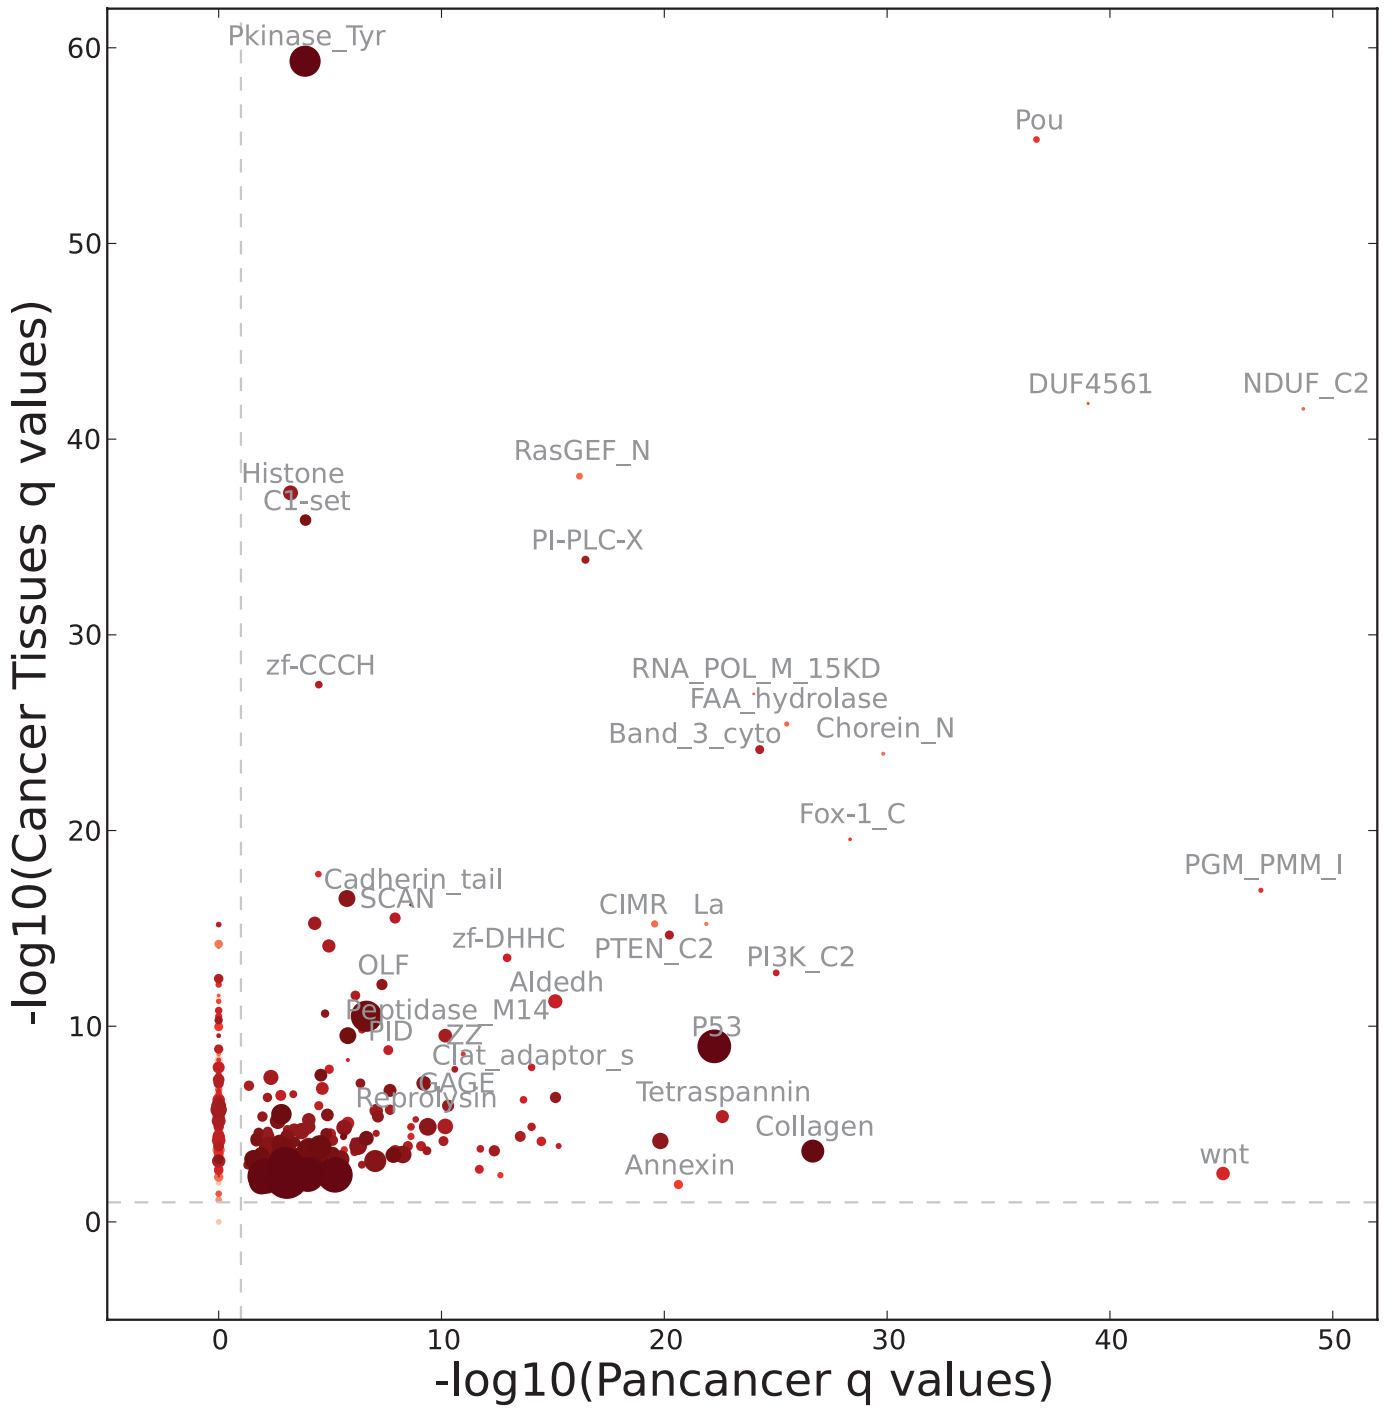

Figure S1

a)

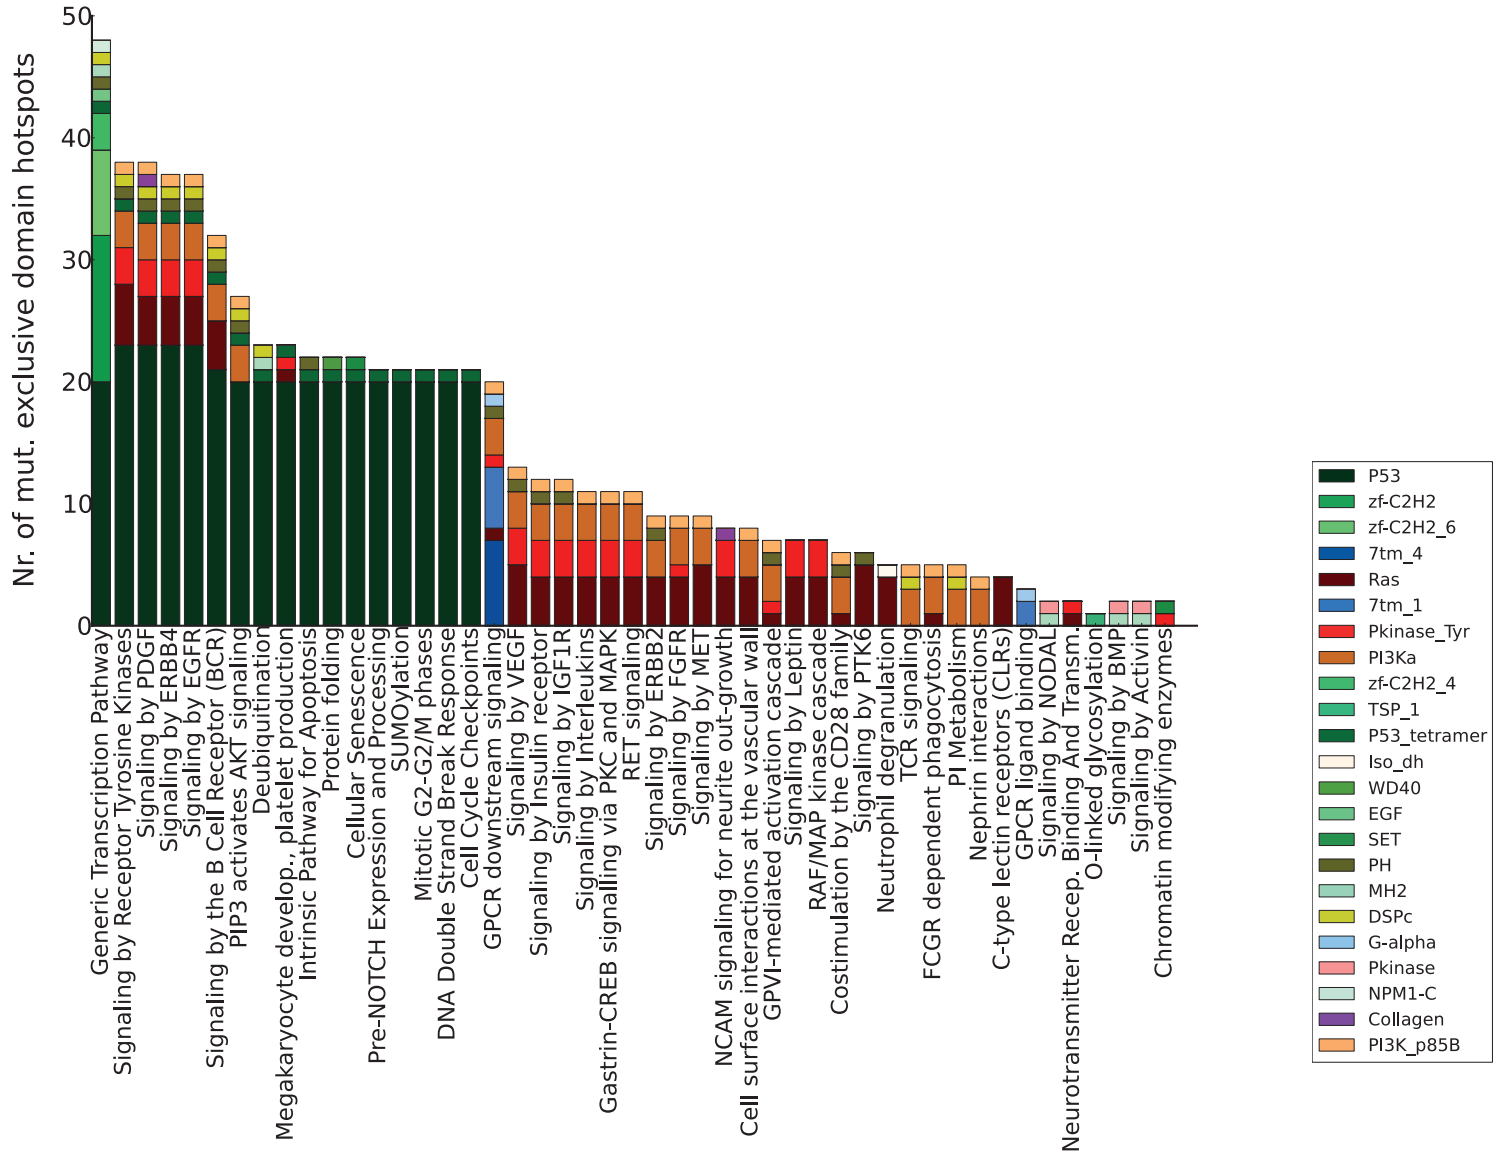

b)

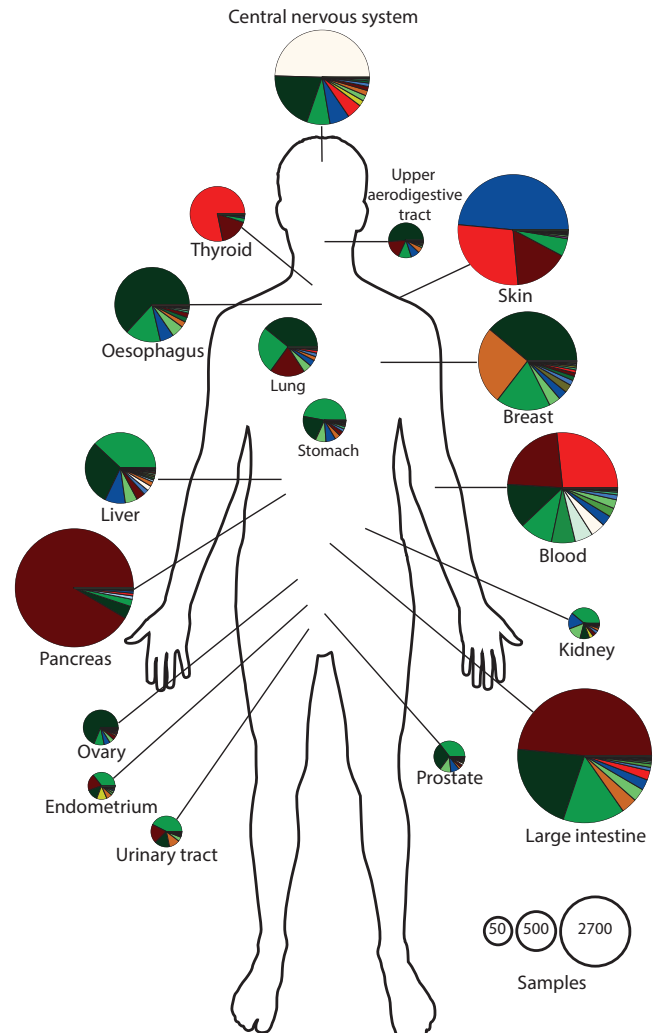

Figure S2

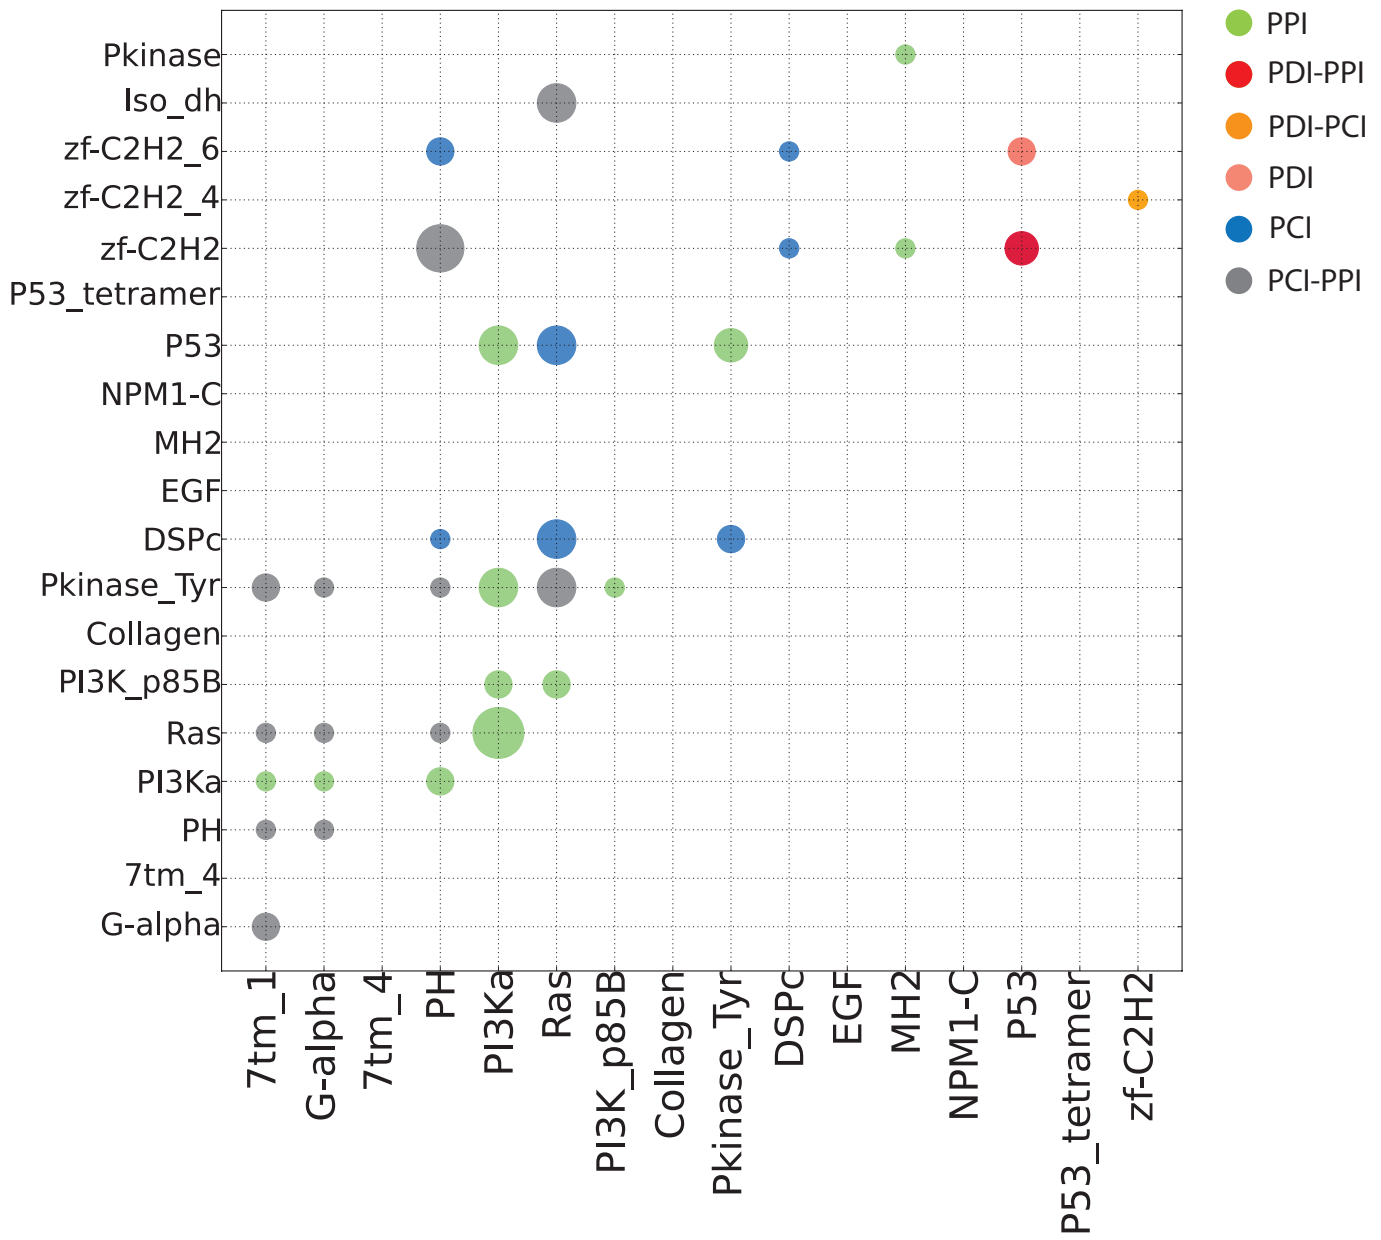

Figure S3

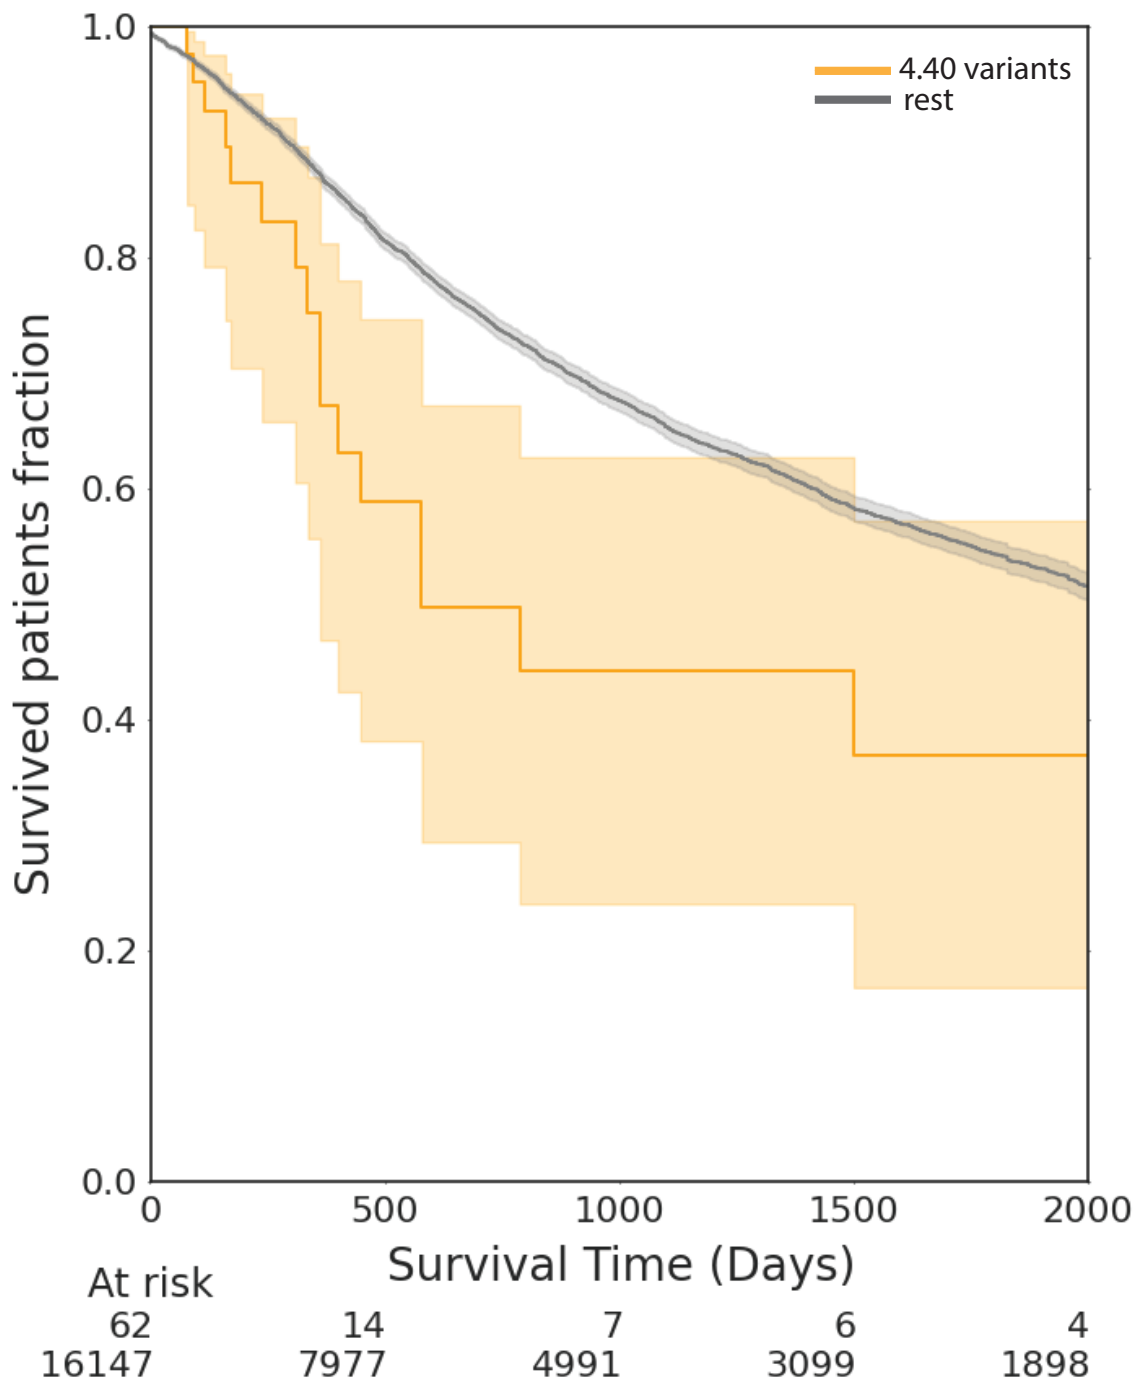

Figure S4

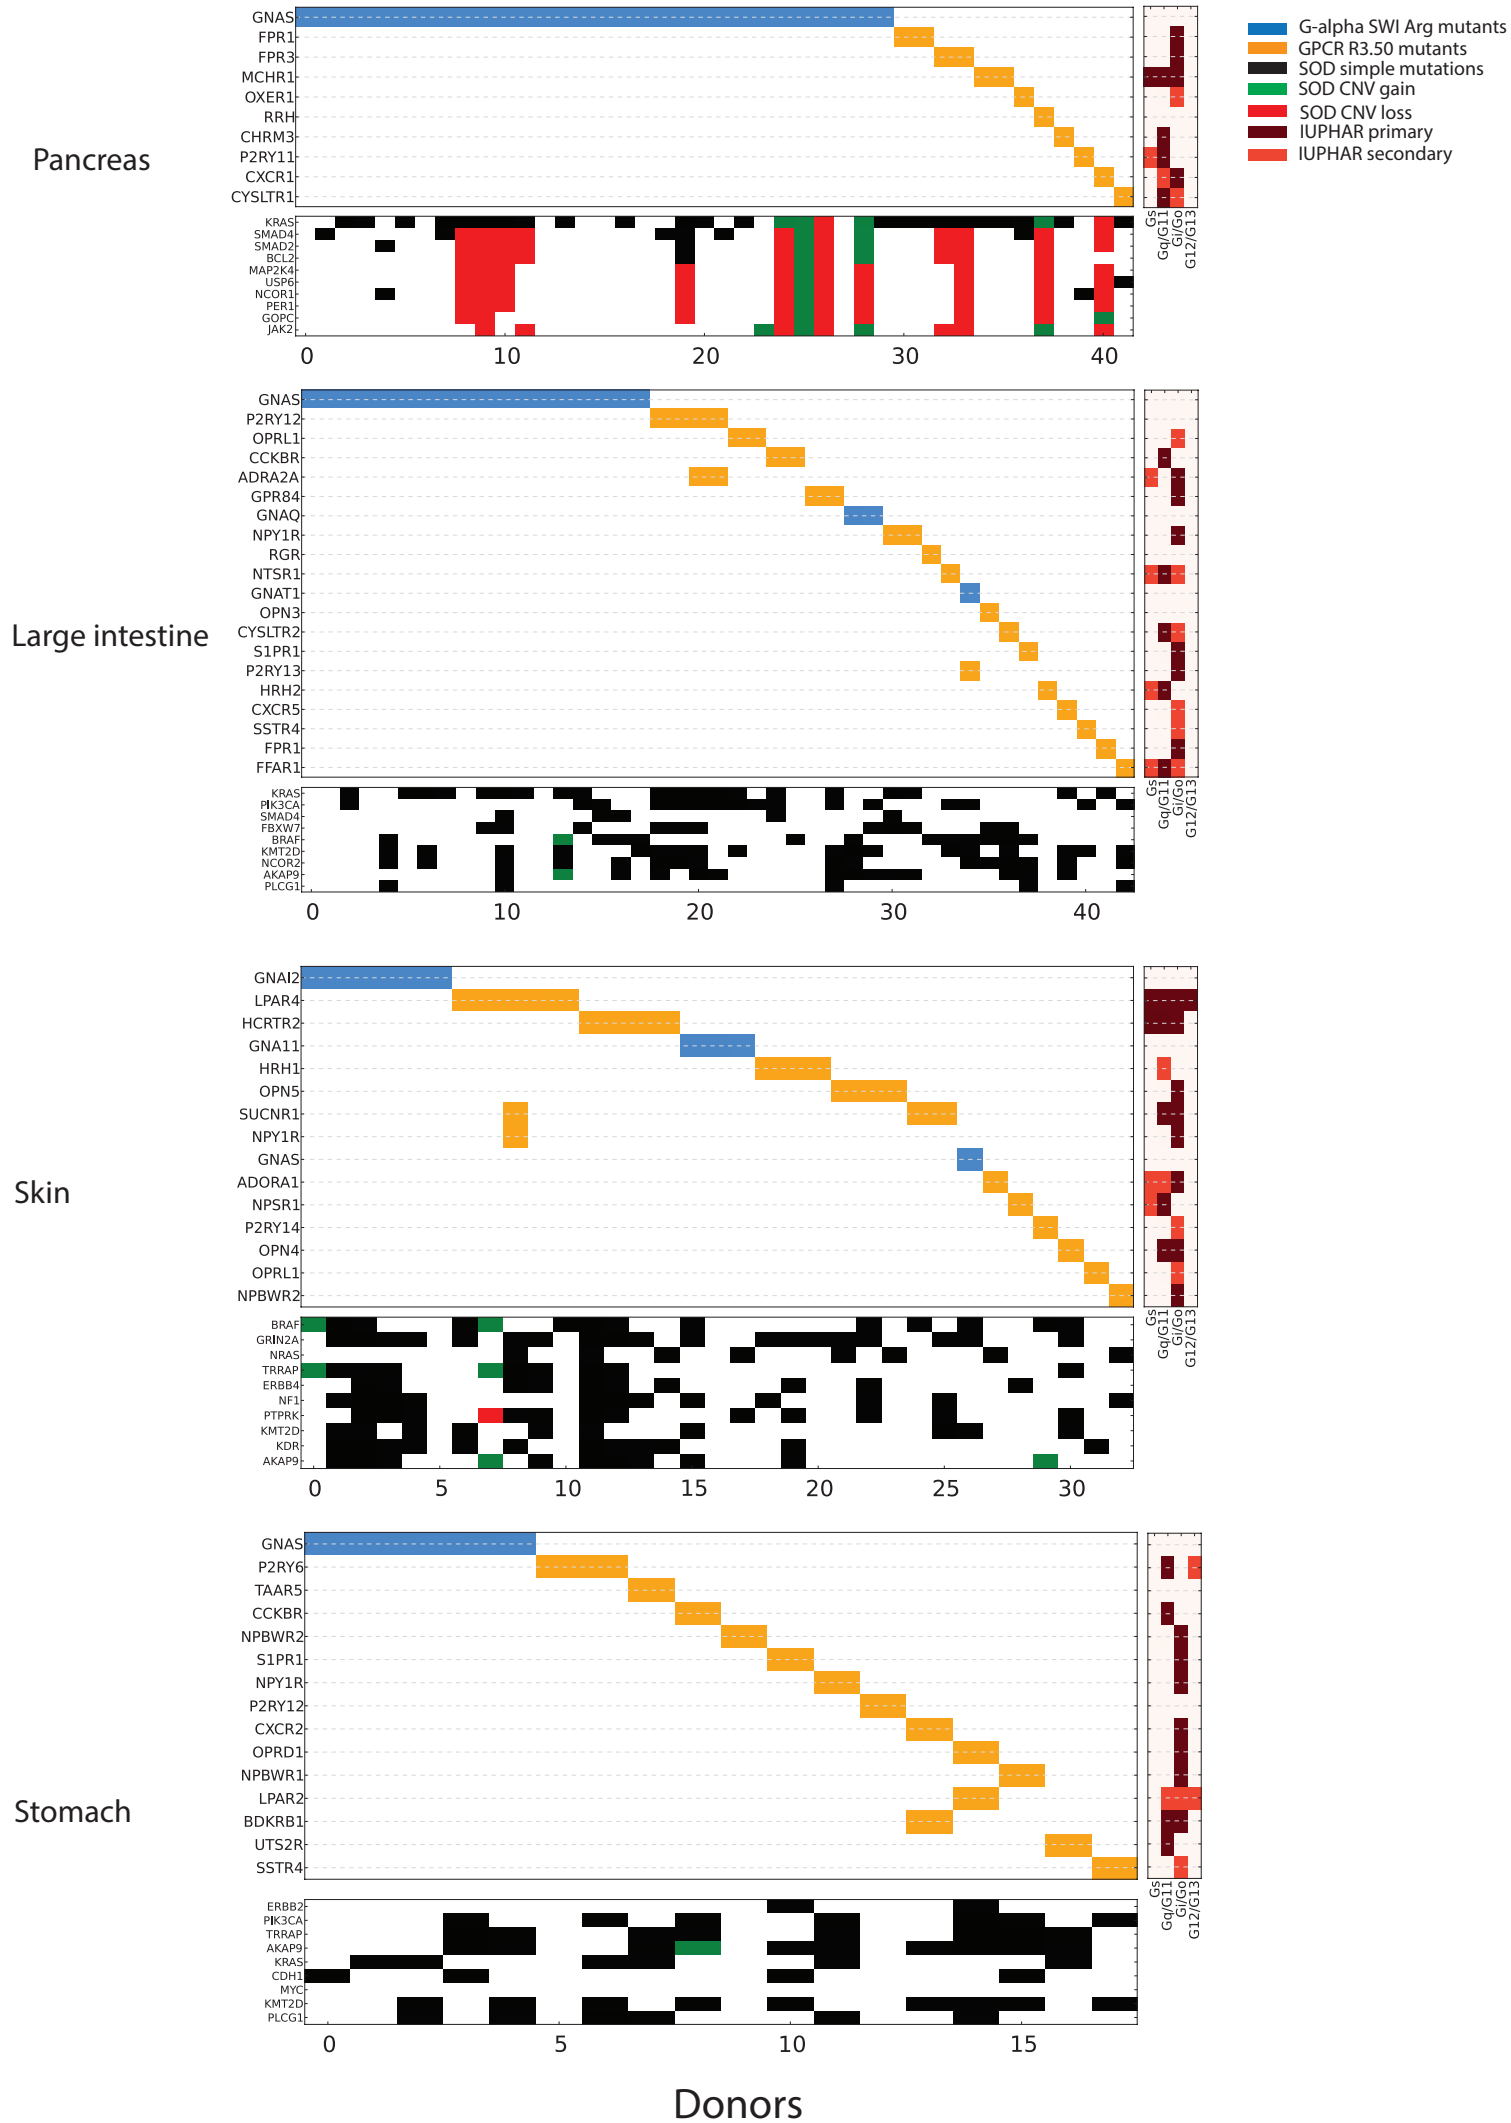

**Figure S5**

# Class A GPCRs variations

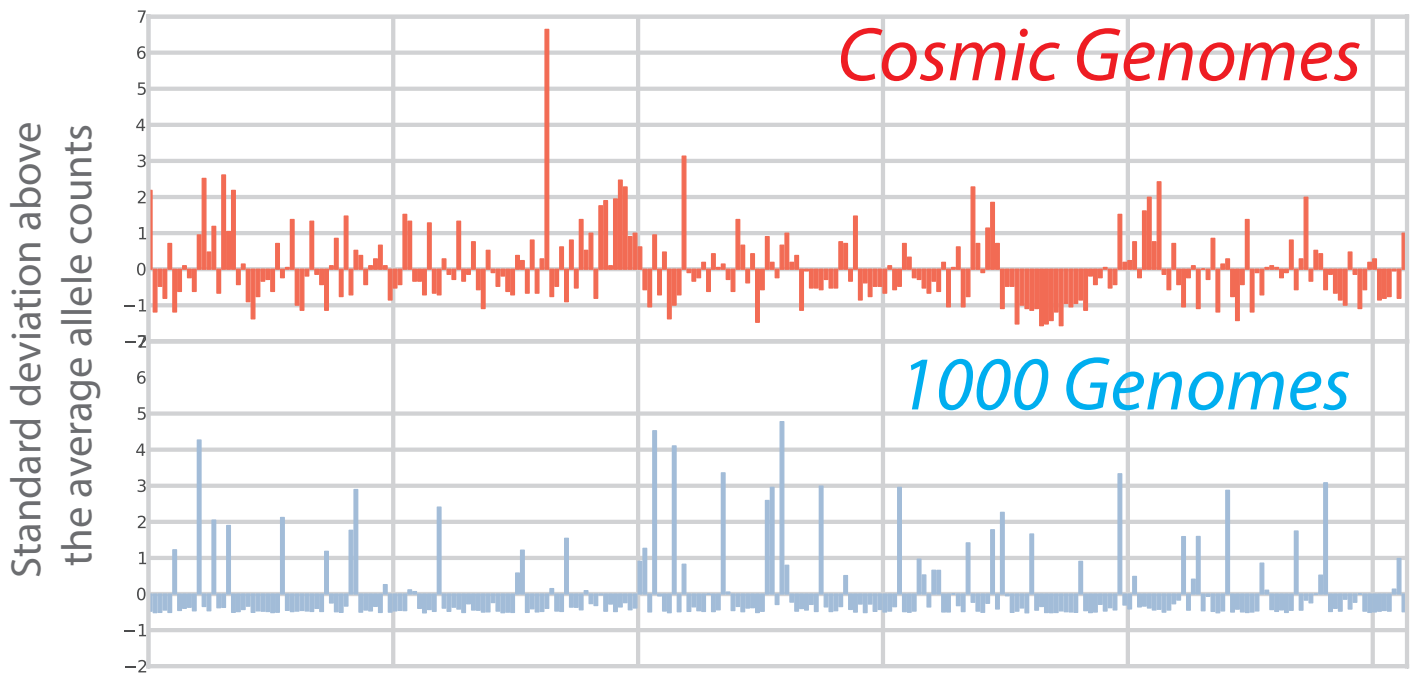

Figure S6

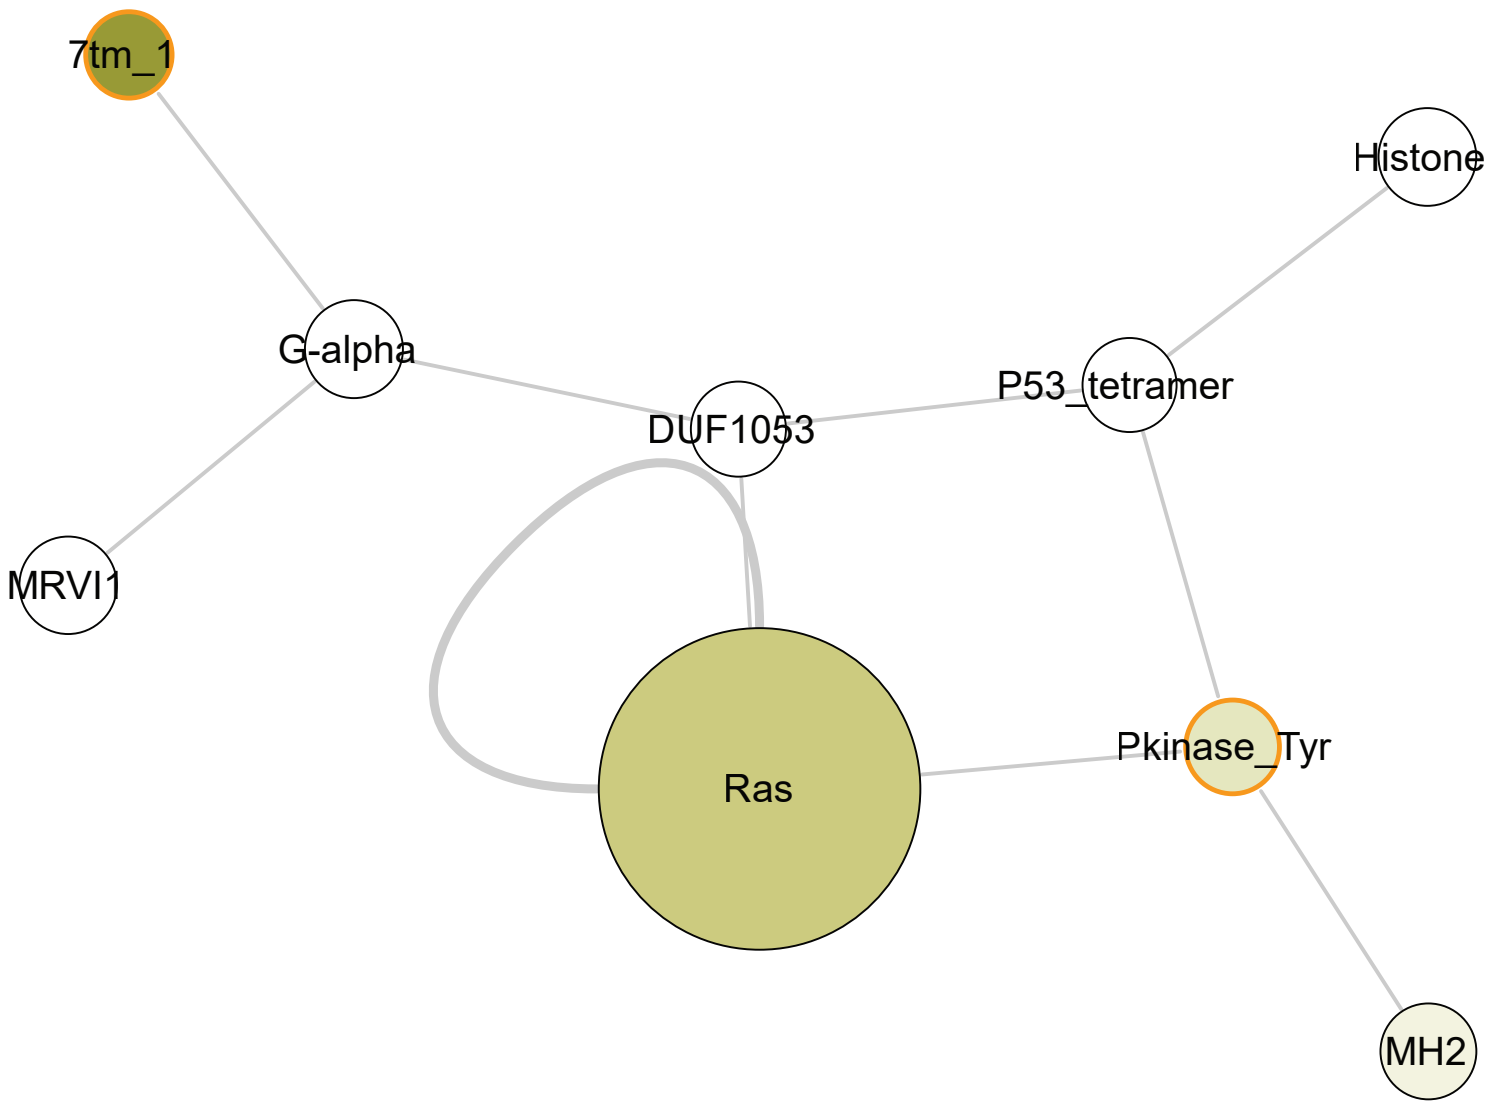

Figure S7

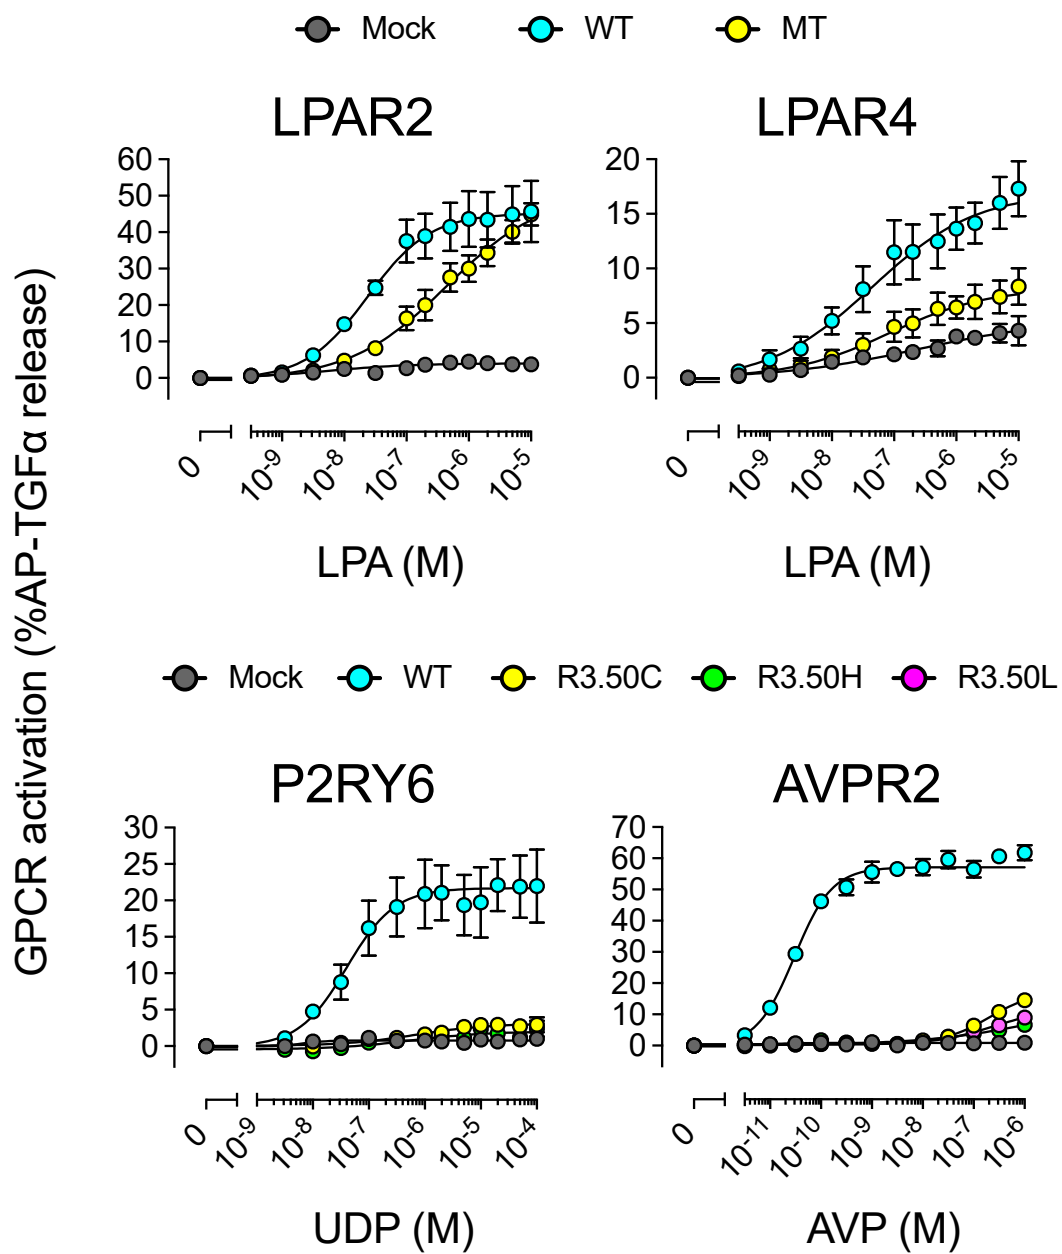

**Figure S8**

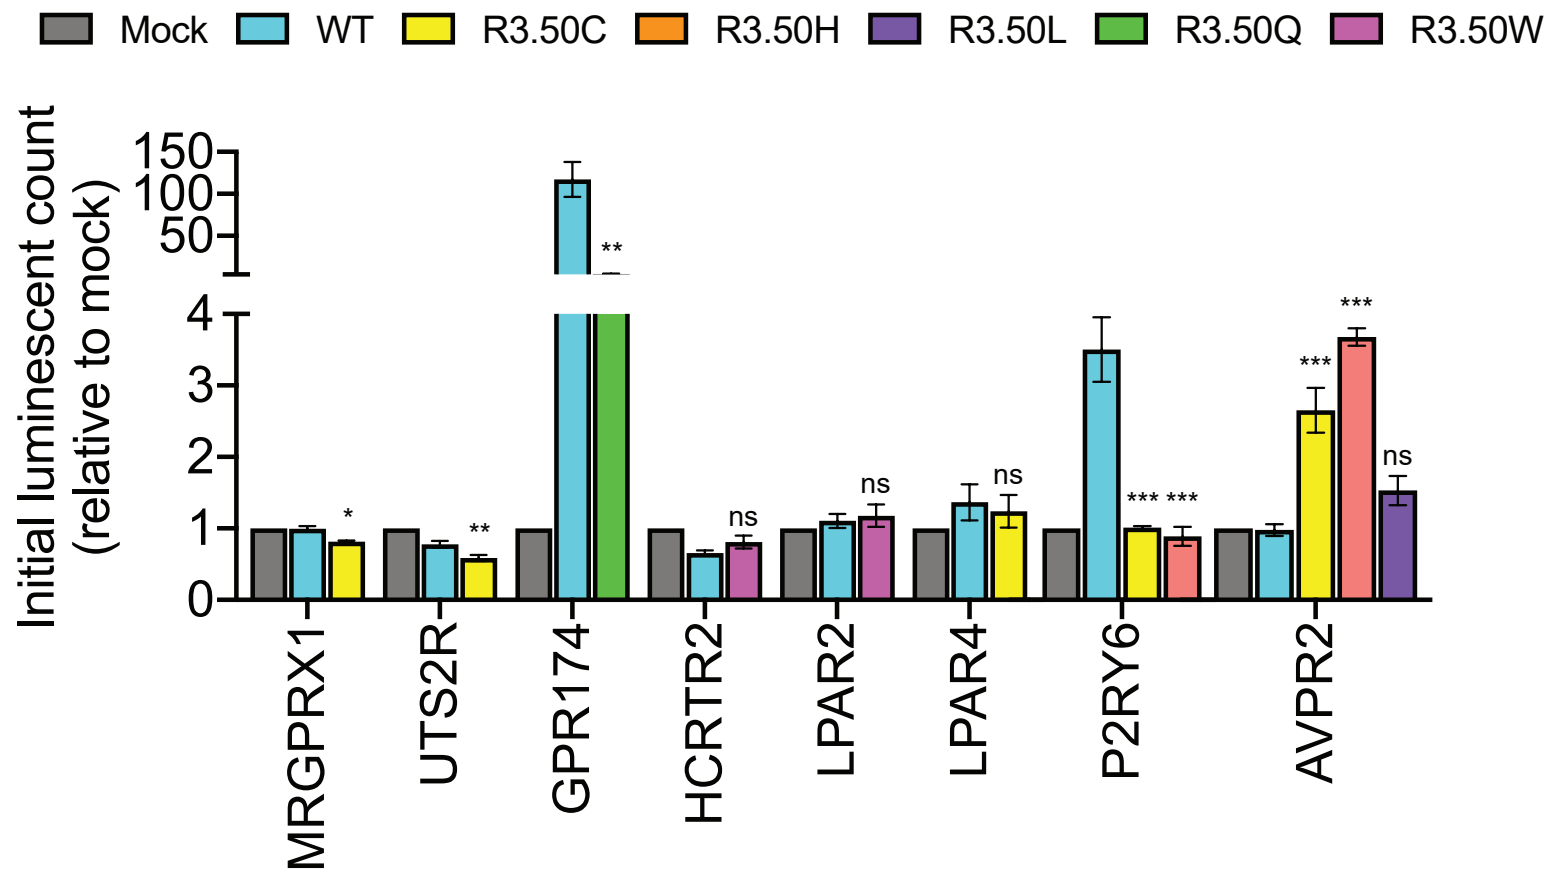

Figure S9

Gs

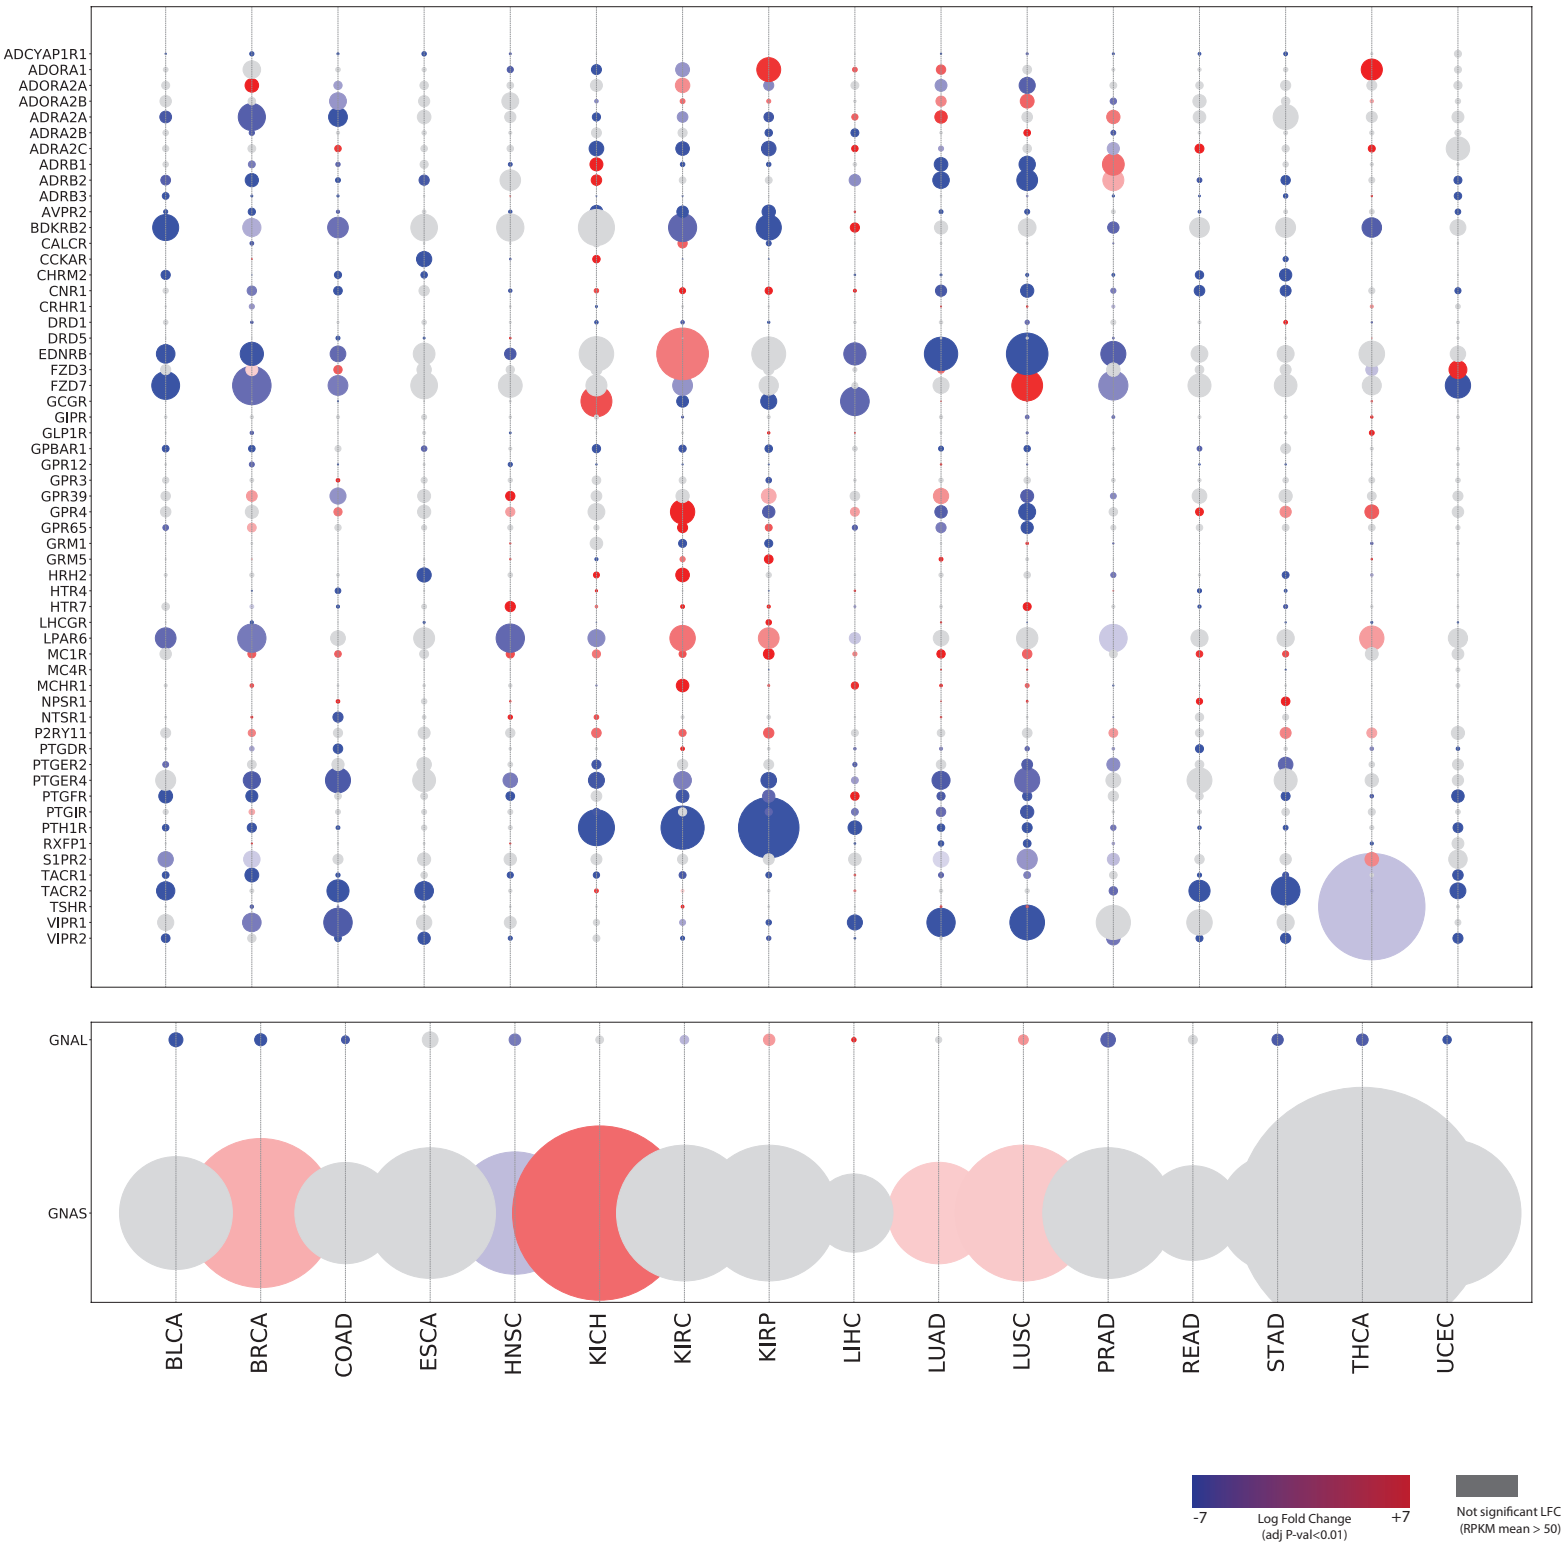

Figure S10

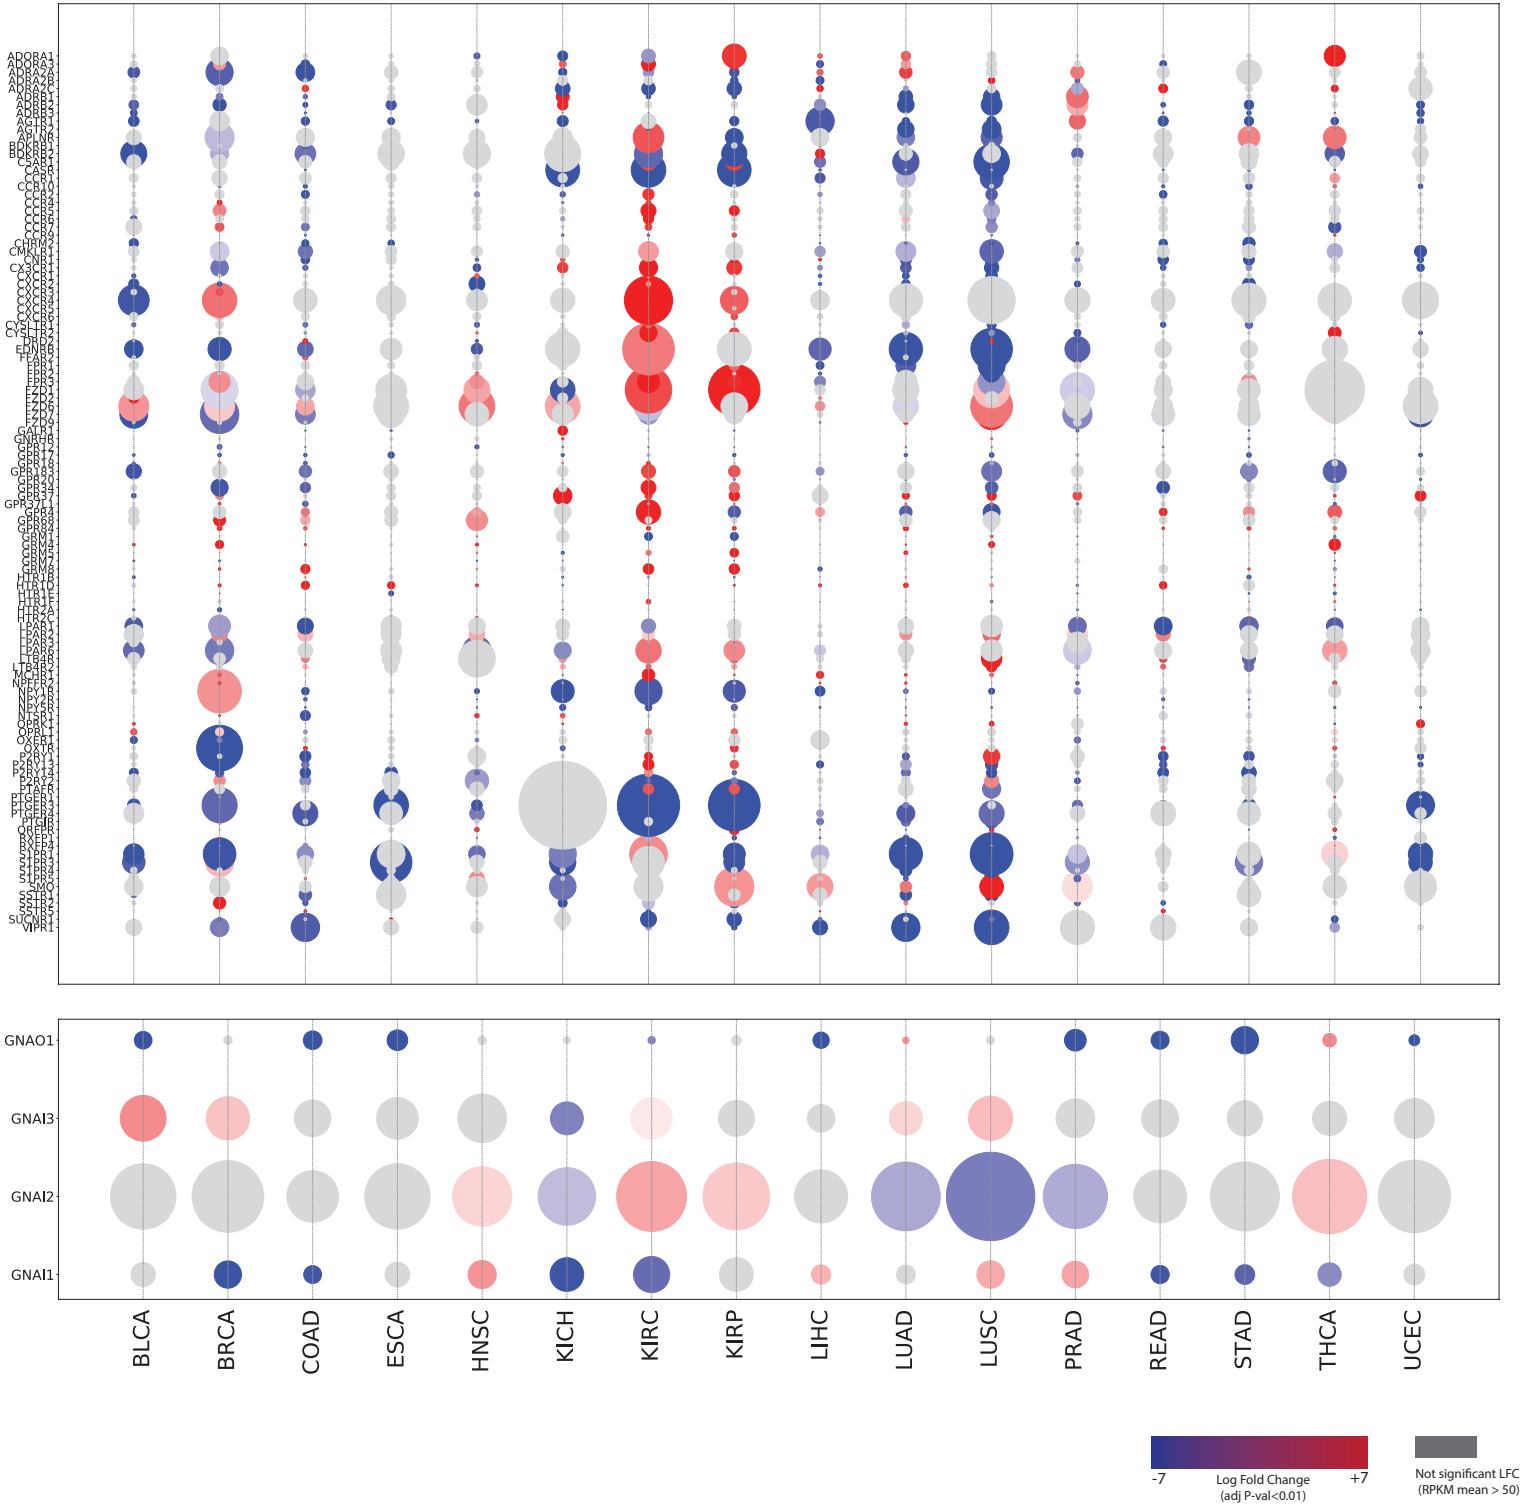

Figure S11

**A****Abnormality of epidermal morphology**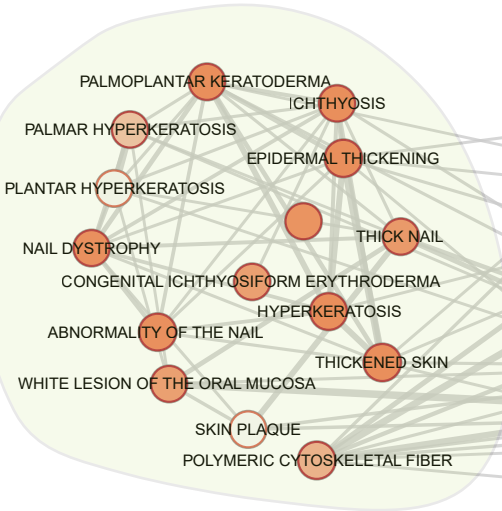**Epidermis development**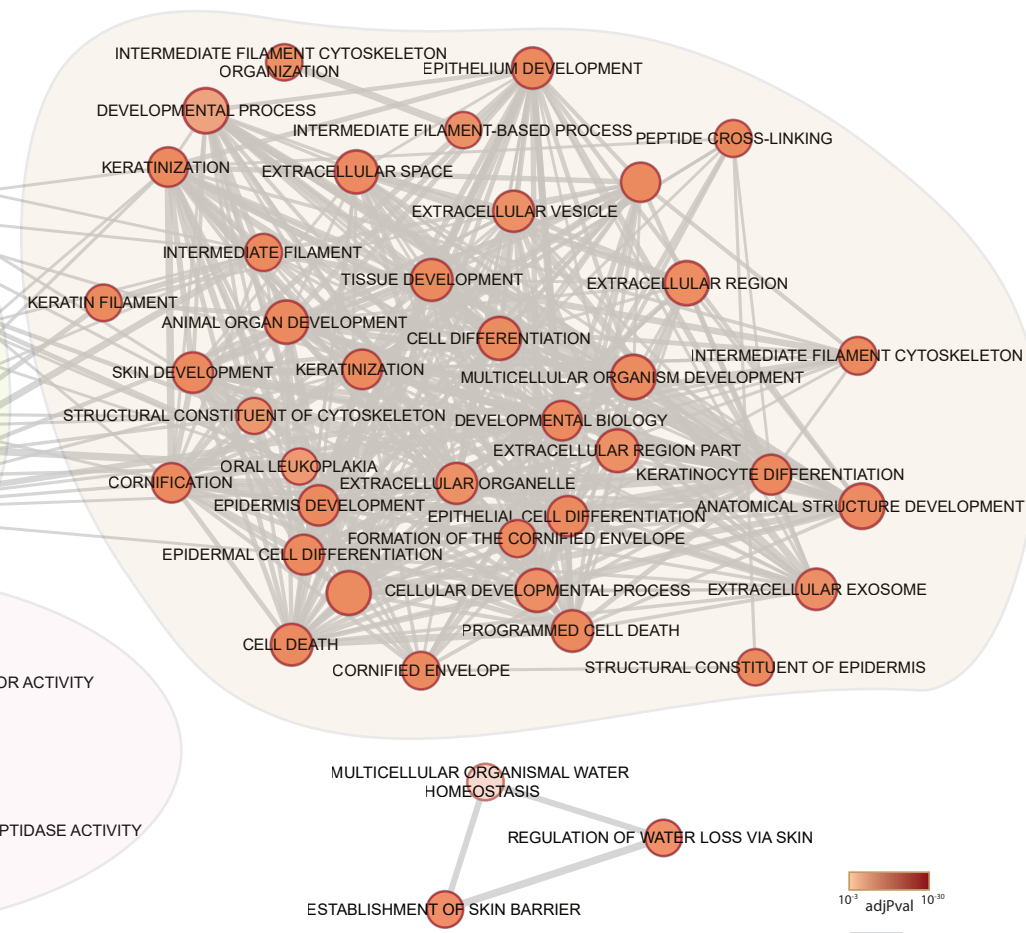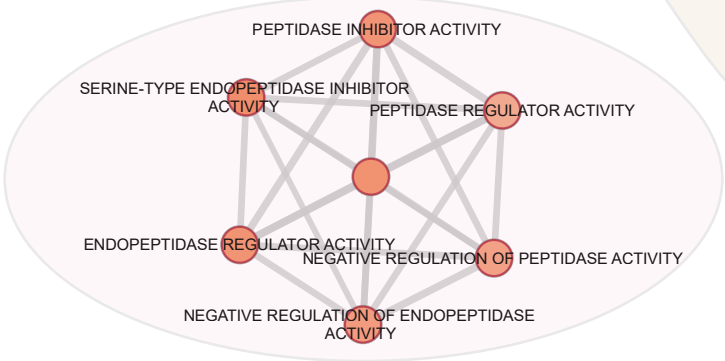**Endopeptidase inhibitor activity**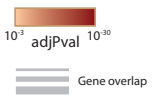**B****Skin**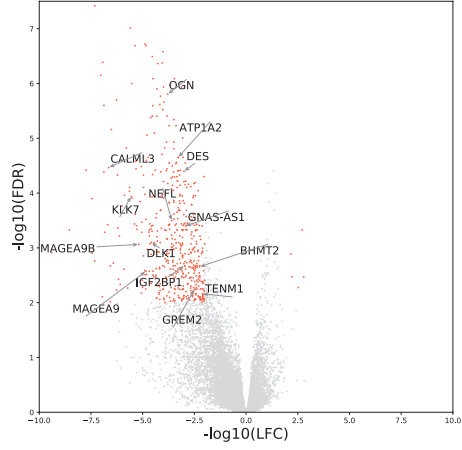**Stomach**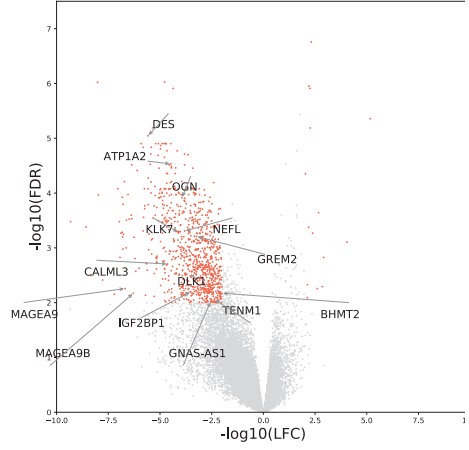**Uterus**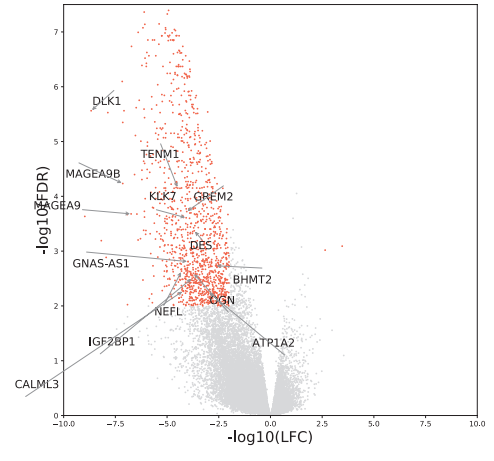

Gi/o

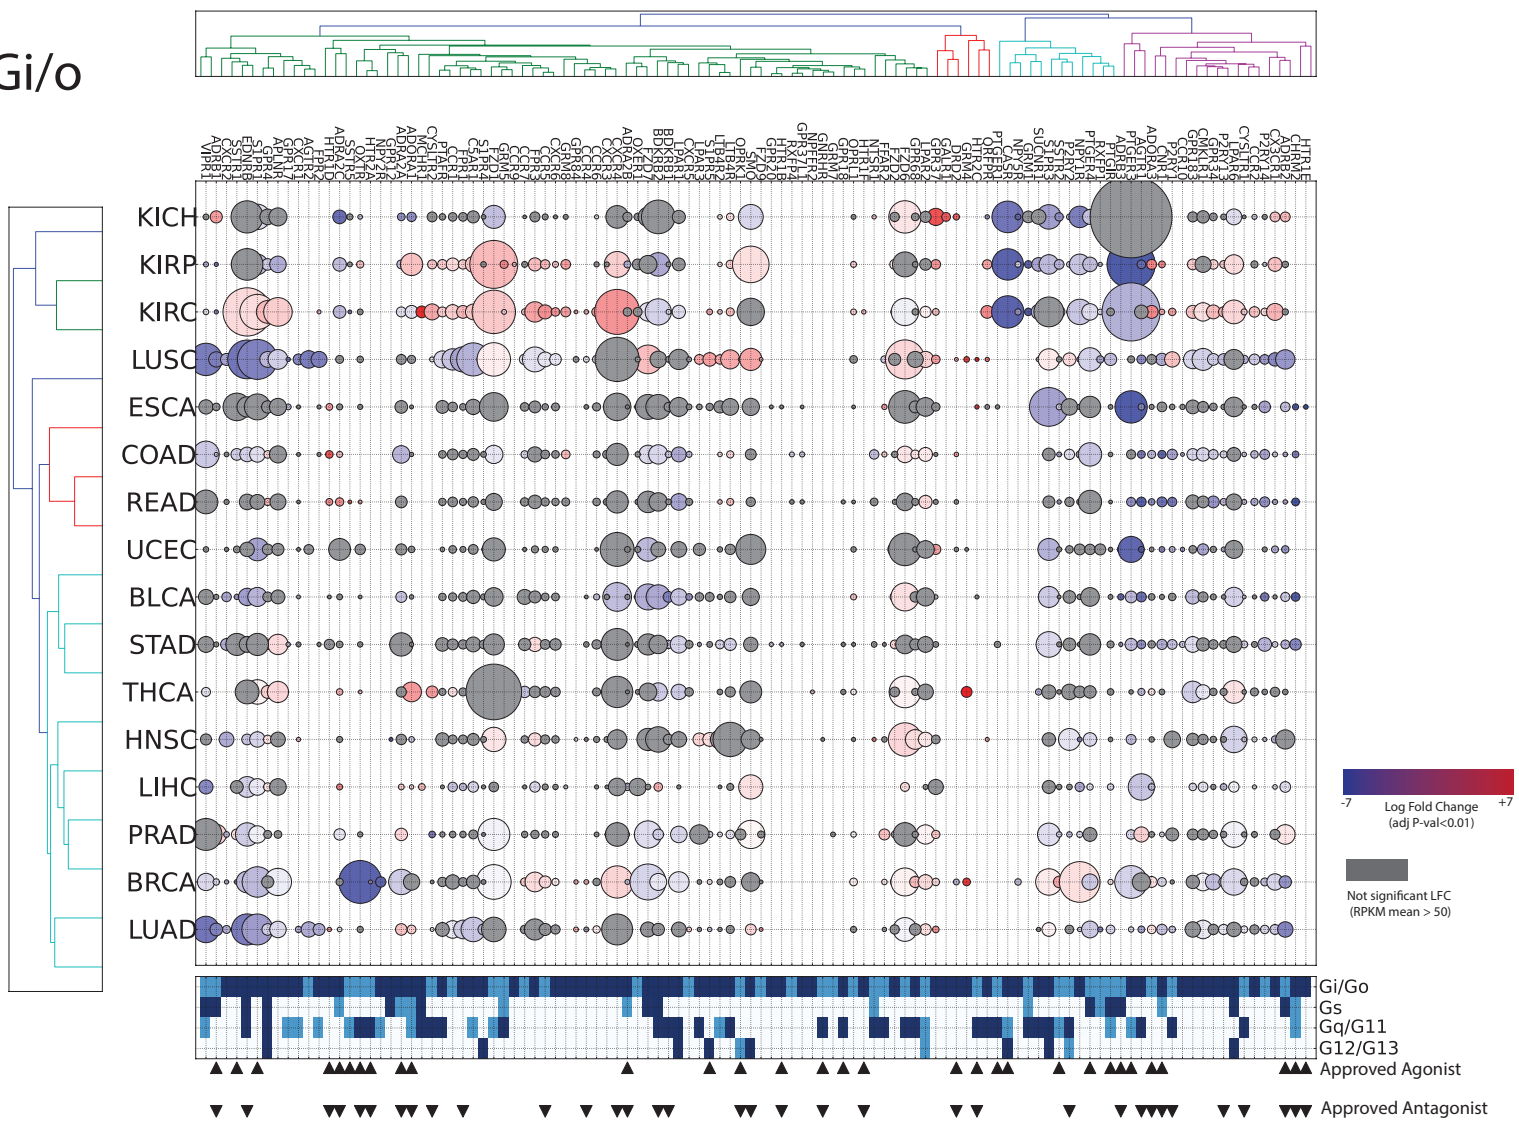

Gs

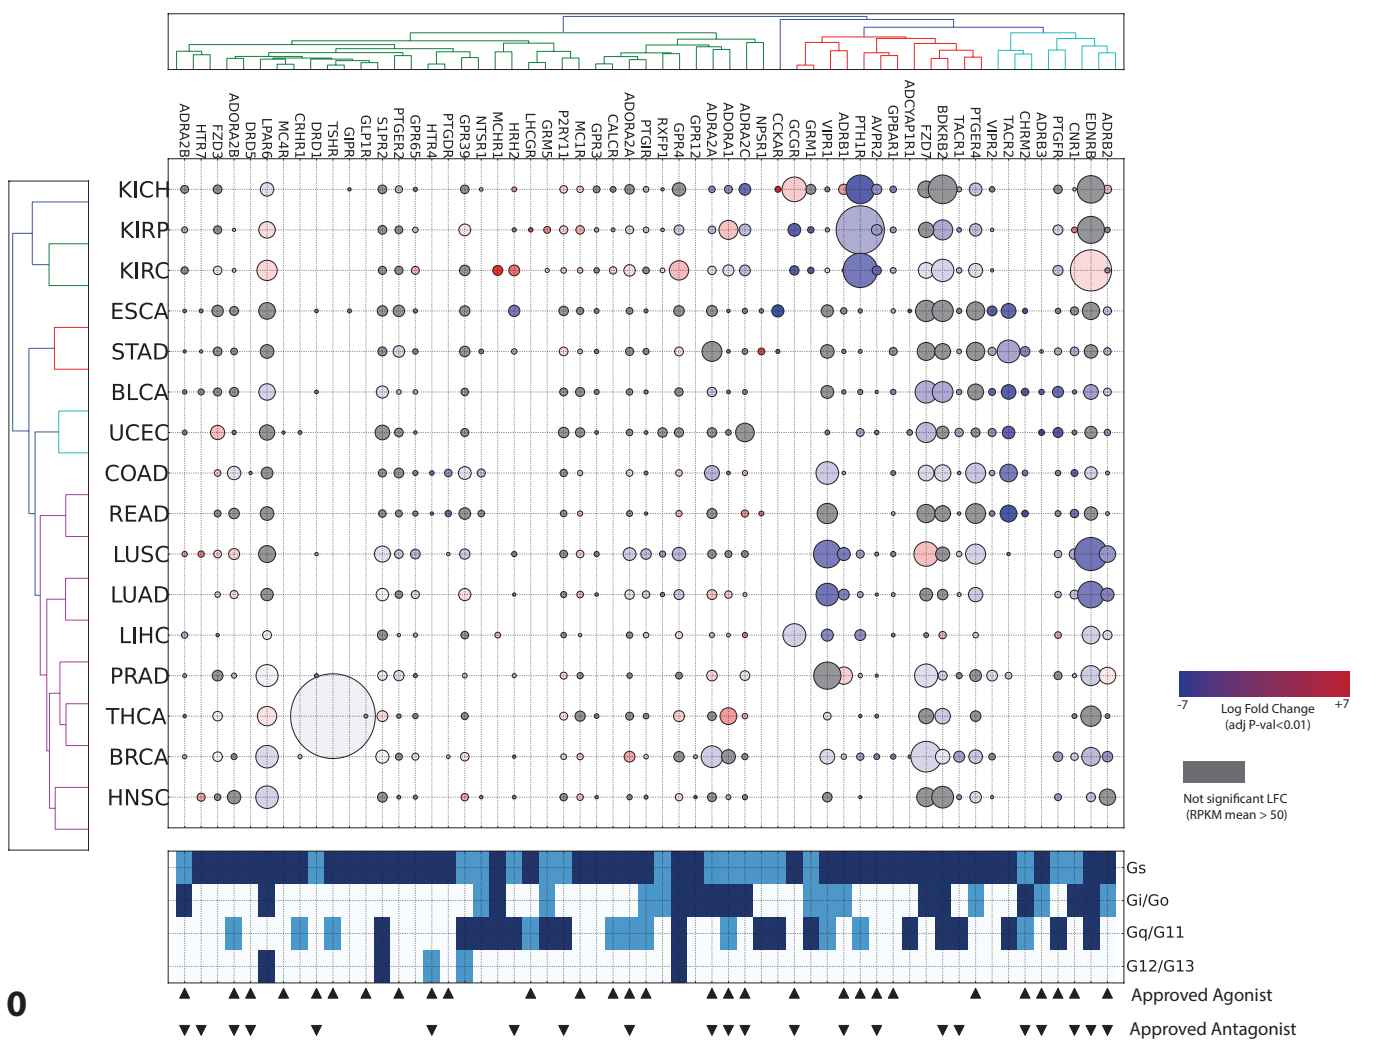

Figure S10

A

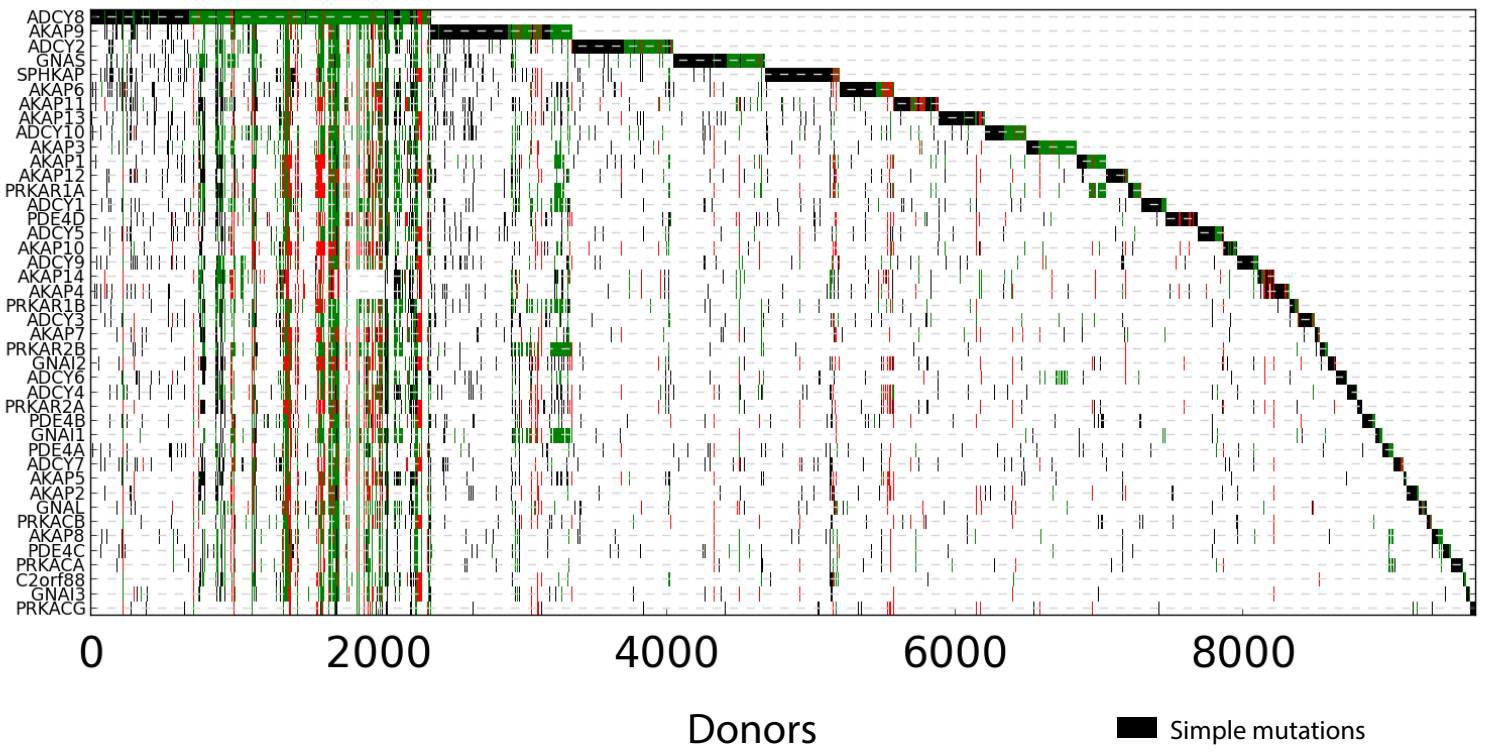

B

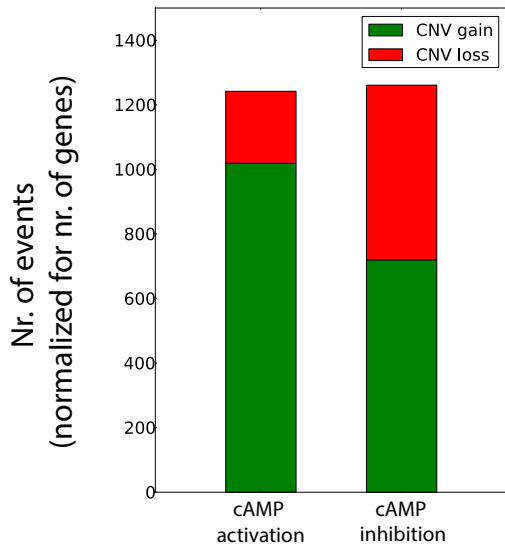

Supplement: MOESM3 [file 41388_2019_895_MOESM3_ESM.pdf]
