# Supplementary material for: Rare, functional, somatic variants in gene families linked to cancer genes: GPCR signaling as a paradigm
Source: Springer Nature journal article supplement (doi:10.1038/s41388-019-0895-2), 2019-07-23
Supplement: MOESM4 [file 41388_2019_895_MOESM4_ESM.pdf]

**A****Abnormality of epidermal morphology**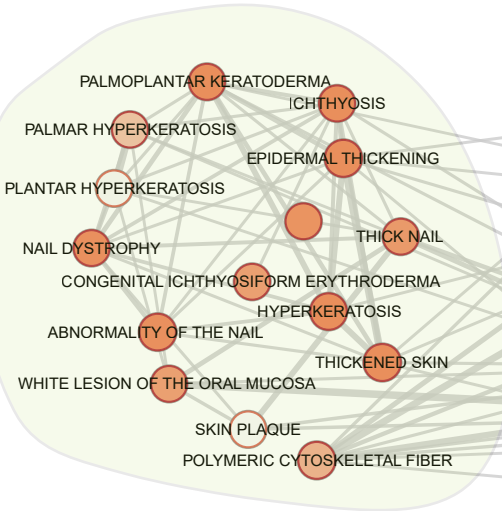**Epidermis development**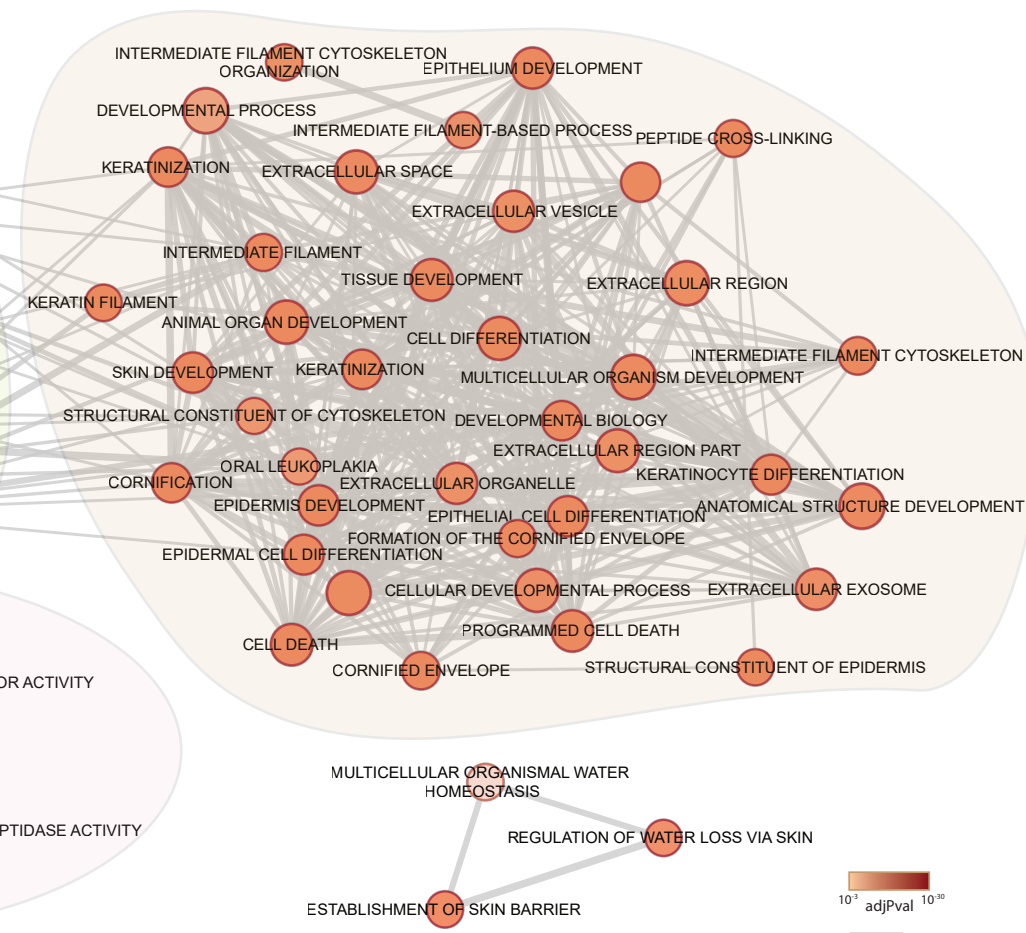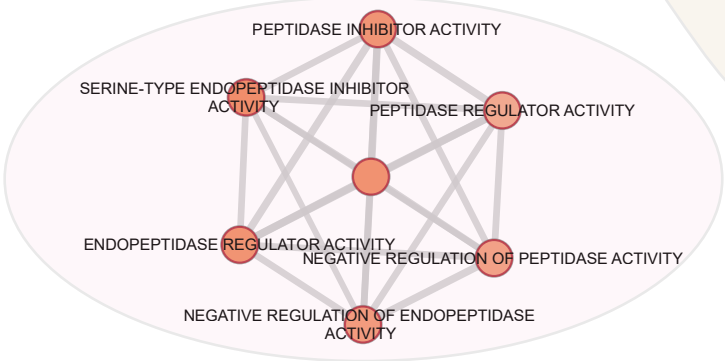**Endopeptidase inhibitor activity**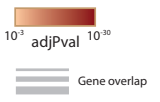**B****Skin**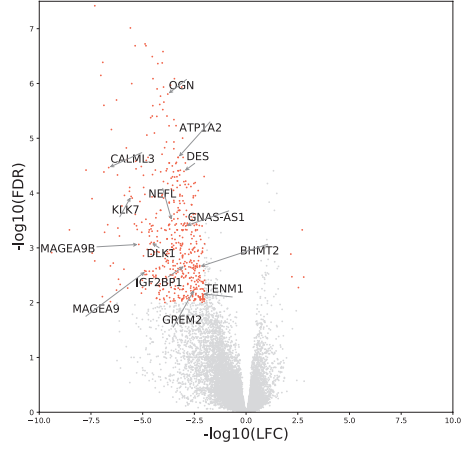**Stomach**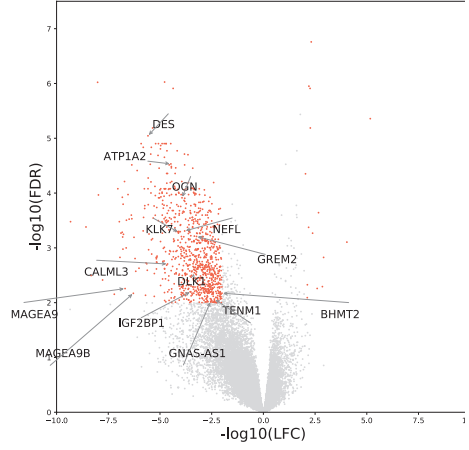**Uterus**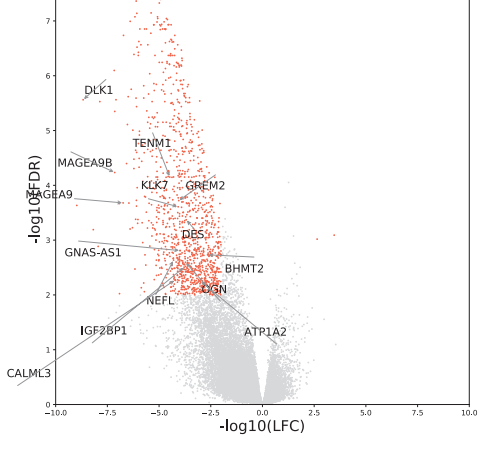**Figure S12**
