# Supplementary material for: Rare, functional, somatic variants in gene families linked to cancer genes: GPCR signaling as a paradigm
Source: Oncogene. 2019 Jul 23;38(38):6491–506. doi: 10.1038/s41388-019-0895-2 (PMC6756116; doi:10.1038/s41388-019-0895-2)
Supplement: Supplementary file 2 — Supplementary Tables [file 41388_2019_895_MOESM2_ESM.xlsx]

## Sheet: S1
Table S1: domain position mutational enrichment (pancancer;Binomial Q-val<0.1)
Domain position mutations	Nr mutations	Nr mutations (random)	Nr. unique sample affected	Nr. unique sample affected (random)	Odds Ratio	Nr Total Variants	Binomial P value	Binomial Q value	Domain length	Family members	Nr domain instances in the proteome	Nr mutated members	Mutated members
Myc_N:36:a	26	0	23	0	10.6831	19456	0	0	332	7	9	2	['MYCN', 'MYC']
Glyco_transf_8:139:r	75	0	20	0	11.0595	19456	0	0	256	20	20	3	['UGGT2', 'Q8IXV1', 'GXYLT1']
RGM_C:69:v	29	0	29	0	11.2033	19456	0	0	171	7	7	1	['RGMA']
Choline_transpo:298:i	22	0	15	0	9.36413	19456	0	0	326	19	19	3	['SLC44A3', 'SLC44A2', 'SLC44A4']
Ist1:98:r	58	0	30	0	12.6887	19456	0	0	164	5	5	2	['KIAA0174', 'IST1']
P53:81:r	1083	27	292	27	14.1891	19456	0	0	196	33	33	1	['TP53']
VWA_2:95:g	21	0	20	0	5.72477	19456	0	0	107	146	226	1	['DDX26B']
PI3Ka:27:a	420	4	387	4	14.5449	19456	0	0	185	10	10	2	['PIK3CA', 'PIK3CB']
Helicase_C_4:256:e	28	0	28	0	11.6381	19456	0	0	265	5	5	1	['SBNO1']
Xylo_C:11:g	56	0	55	0	13.375	19456	0	0	182	3	3	2	['XYLT2', 'XYLT1']
Pkinase_Tyr:153:d	1005	26	979	26	8.82183	19456	0	0	260	1213	1264	26	['FGFR2', 'BRAF', 'FLT3', 'FGFR4', 'EPHA8', 'LCK', 'KIT', 'TEK', 'FLT1', 'HCK', 'INSRR', 'STYK1', 'ANKK1', 'RAF1', 'EPHA2', 'TEX14', 'NTRK2', 'ERBB2', 'TGFBR2', 'FLT4', 'TEC', 'EGFR', 'MET', 'RIPK2', 'TIE1', 'KDR']
PDEase_I_N:22:r	22	0	10	0	9.80471	19456	0	0	61	14	14	2	['PDE1A', 'PDE1C']
SNARE_assoc:116:y	25	0	25	0	11.2115	19456	0	0	120	6	6	2	['TMEM41B', 'TMEM41A']
Arv1:159:k	29	0	29	0	14.0106	19456	0	0	209	1	1	1	['ARV1']
RBM39linker:44:a	23	0	23	0	10.8688	19456	0	0	89	7	7	1	['RBM23']
CKAP2_C:281:k	29	0	29	0	10.6887	19456	0	0	348	7	10	1	['CKAP2']
DUF1907:58:l	28	0	16	0	11.6381	19456	0	0	283	4	5	1	['C11orf54']
2-oxogl_dehyd_N:35:r	23	0	12	0	11.3543	19456	0	0	41	5	5	1	['OGDH']
GREB1:525:e	28	0	28	0	10.6381	19456	0	0	1955	7	10	1	['GREB1L']
DUF846:108:i	21	0	21	0	10.96	19456	0	0	139	6	6	1	['FAM18A']
Dynamitin:167:r	22	0	11	0	12.0271	19456	0	0	388	3	3	1	['DCTN2']
CDC27:276:r	37	0	26	0	12.7771	19456	0	0	427	3	3	1	['POLD3']
Ras:58:q	743	47	568	47	10.5503	19456	0	0	162	274	282	16	['RAC1', 'NRAS', 'KRAS', 'HRAS', 'RRAS2', 'RAB21', 'RAB6C', 'RHOU', 'RND3', 'RAB11A', 'GEM', 'RAB17', 'RAB1A', 'RAB14', 'RERGL', 'RAC3']
P53:155:r	1190	43	339	43	14.325	19456	0	0	196	33	33	1	['TP53']
Nramp:120:i	29	0	17	0	11.2033	19456	0	0	358	7	7	2	['SLC11A1', 'SLC11A2']
FRG2:103:r	23	0	23	0	11.6762	19456	0	0	184	4	4	2	['FRG2B', 'FRG2C']
Fumble:141:e	21	0	13	0	10.0855	19456	0	0	332	10	11	2	['PANK1', 'PANK4']
P53:189:r	624	26	163	26	13.3936	19456	0	0	196	33	33	1	['TP53']
PUFD:86:p	23	0	23	0	11.0912	19456	0	0	115	6	6	1	['BCORL1']
Ras:8:s	2961	39	1549	39	12.5449	19456	0	0	162	274	282	19	['MRAS', 'KRAS', 'NRAS', 'RALB', 'DIRAS3', 'RASEF', 'HRAS', 'RHOT2', 'RALA', 'RAP1B', 'RAP1A', 'RAP2B', 'RAB5B', 'RHOG', 'RRAS2', 'EFCAB4B', 'RAB7L1', 'RAB5C', 'REM1']
P53:152:g	575	43	159	43	13.2757	19456	0	0	196	33	33	1	['TP53']
DNA_pol_B_exo1:176:p	33	0	17	0	11.3897	19456	0	0	337	5	7	2	['POLE', 'REV3L']
G-alpha:185:r	264	2	148	2	12.1526	19456	0	0	354	35	33	8	['GNAI2', 'GNAQ', 'GNAS', 'GNA15', 'GNA13', 'GNAT3', 'GNAT1', 'GNA11']
Xan_ur_permease:266:k	42	0	42	0	11.223	19456	0	0	389	8	10	1	['SLC23A2']
CLCA:694:e	35	0	35	0	12.2819	19456	0	0	717	4	4	1	['CLCA4']
DUF3736:46:v	30	0	30	0	11.4746	19456	0	0	135	3	6	1	['KIAA0182']
PI-PLC-X:110:e	21	0	7	0	8.33549	19456	0	0	145	37	37	2	['PLCH1', 'PLCD1']
ALS2CR11:397:p	21	0	7	0	11.5449	19456	0	0	418	4	4	1	['ALS2CR11']
NAD_binding_2:110:k	27	0	27	0	10.4481	19456	0	0	158	13	11	1	['GLYR1']
P53:120:r	715	28	190	28	13.59	19456	0	0	196	33	33	1	['TP53']
JCAD:175:r	32	0	32	0	14.1526	19456	0	0	1358	1	1	1	['KIAA1462']
CENP-N:272:v	21	0	7	0	10.7376	19456	0	0	416	5	7	1	['CENPN']
DUF2431:142:l	22	0	11	0	13.6121	19456	0	0	162	1	1	1	['ENSG00000255561']
IF-2B:267:p	26	0	12	0	10.6831	19456	0	0	282	8	9	2	['MRI1', 'EIF2B4']
Iso_dh:127:R	505	1	502	1	14.8108	19456	0	0	348	10	10	4	['IDH3B', 'IDH2', 'IDH1', 'IDH3G']
Tmemb_185A:54:a	35	0	35	0	12.2819	19456	0	0	247	4	4	1	['TMEM60']
ecTbetaR2:79:a	39	0	38	0	13.438	19456	0	0	110	2	2	1	['TGFBR2']
AJAP1_PANP_C:24:l	28	0	28	0	12.375	19456	0	0	193	3	3	1	['AJAP1']
Plexin_cytopl:510:k	32	0	30	0	10.3453	19456	0	0	555	13	14	2	['PLXNA4', 'PLXNA2']
P53:180:r	1478	34	402	34	14.6377	19456	0	0	196	33	33	2	['TP53', 'TP63']
TORC_C:12:s	49	0	26	0	12.4454	19456	0	0	75	5	5	3	['CRTC1', 'CRTC2', 'CRTC3']
MutS_II:11:e	36	0	36	0	11.3226	19456	0	0	137	8	8	1	['MSH3']
Xpo1:29:d	37	0	35	0	11.0402	19456	0	0	149	11	10	2	['XPO6', 'XPOT']
TMEM37:64:s	33	0	33	0	14.197	19456	0	0	183	1	1	1	['TMEM37']
DOR:36:e	24	0	14	0	12.1526	19456	0	0	248	3	3	1	['TP53INP1']
Arfaptin:184:k	22	0	19	0	9.91162	19456	0	0	229	13	13	2	['ARFIP1', 'ICA1']
Tmemb_cc2:326:q	22	0	11	0	10.6121	19456	0	0	396	7	8	1	['TMCC1']
RB_B:16:r	21	0	11	0	11.5449	19456	0	0	132	4	4	2	['RB1', 'RBL1']
L6_membrane:16:p	28	0	28	0	10.96	19456	0	0	192	7	8	1	['TM4SF18']
DNA_pol_B_exo1:323:v	24	0	13	0	10.9302	19456	0	0	337	5	7	2	['POLE', 'REV3L']
Med15:220:q	24	0	12	0	11.7376	19456	0	0	780	3	4	2	['PCQAP', 'MED15']
Ras:9:a	492	39	296	39	9.95559	19456	0	0	162	274	282	25	['RIT2', 'RASL12', 'DIRAS2', 'RALB', 'RASEF', 'RAB34', 'NRAS', 'GEM', 'RAP2C', 'RAC1', 'RASD1', 'KRAS', 'HRAS', 'RAB11B', 'RHOBTB2', 'NKIRAS2', 'RAB5C', 'EFCAB4B', 'RAB6A', 'RAP1B', 'MRAS', 'RAB35', 'RAB1A', 'RRAS', 'RRAS2']
T-box:176:p	26	0	17	0	8.76561	19456	0	0	183	34	34	7	['EOMES', 'TBX3', 'TBX5', 'TBX10', 'T', 'TBX19', 'TBX22']
FAM75:119:s	36	0	18	0	10.1526	19456	0	0	381	16	18	1	['FAM205A']
HAT_KAT11:90:D	24	0	24	0	12.1526	19456	0	0	352	3	3	2	['CREBBP', 'EP300']
PI3Ka:24:k	207	3	187	3	13.5242	19456	1.07226e-304	7.44503e-303	185	10	10	1	['PIK3CA']
P53:127:y	475	65	128	65	13	19456	1.15737e-256	7.91774e-255	196	33	33	1	['TP53']
P53:156:r	335	26	94	26	12.4963	19456	3.47988e-256	2.34614e-254	196	33	33	2	['TP53', 'TP63']
P53:85:h	463	77	124	76	12.9631	19456	3.77089e-216	2.50603e-214	196	33	33	1	['TP53']
WD40:14:t	680	181	227	174	7.95747	19456	2.50517e-204	1.64142e-202	38	506	1557	59	['BRWD3', 'PLRG1', 'PRPF19', 'DNAI1', 'RBBP7', 'TBL1XR1', 'WDR74', 'WDR3', 'WDFY1', 'SEC13', 'WDTC1', 'WDR59', 'GTF3C2', 'BTRC', 'FBXW7', 'FBXW11', 'HIRA', 'COPA', 'SMU1', 'SPAG16', 'WDR26', 'RBBP4', 'POC1B', 'CDC40', 'STRN4', 'STXBP5', 'WDR69', 'ELP2', 'TSSC1', 'POC1A', 'WDR41', 'KIAA1875', 'PAFAH1B1', 'PRPF4', 'CIAO1', 'WSB1', 'ARPC1A', 'BRWD1', 'EML3', 'WDR89', 'PWP1', 'WDR5B', 'WDR5', 'ATG16L…
P53:148:s	238	16	62	16	12.0031	19456	2.72109e-196	1.75813e-194	196	33	33	1	['TP53']
zf-C2H2:21:r	919	324	419	293	7.30176	19456	2.1944e-194	1.39841e-192	23	1207	3315	262	['ZNF347', 'ZNF83', 'RBAK', 'ZNF420', 'ZNF846', 'ZNF264', 'ENSG00000221895', 'ZNF71', 'ZNF160', 'ZNF610', 'ZNF117', 'ZNF691', 'ZNF619', 'ZNF41', 'ZNF678', 'ZNF180', 'ZNF436', 'ZFP2', 'ZNF454', 'ZNF565', 'ZNF621', 'ZNF135', 'ZNF502', 'ZNF648', 'ZSCAN10', 'SNAI2', 'ZNF85', 'ZNF167', 'ZNF234', 'ZNF813', 'ZNF696', 'HIC2', 'ZBTB6', 'ZNF35', 'ZNF567', 'ZNF470', 'ZNF320', 'ZSCAN5C', 'ZNF418', 'ZNF534', …
P53_tetramer:26:k	211	12	104	12	12.1188	19456	1.08186e-188	6.8011e-187	42	27	27	1	['TP53']
DSPc:86:R	163	7	144	7	9.872	19456	3.66632e-165	2.2741e-163	133	144	99	18	['DUSP6', 'DUSP12', 'SSH1', 'PTEN', 'CDC14B', 'DUSP18', 'DUSP4', 'RNGTT', 'DUSP3', 'PTPDC1', 'DUSP23', 'DUSP19', 'DUSP5', 'DUSP26', 'TPTE2', 'SSH3', 'DUSP13', 'DUPD1']
P53:185:p	234	22	67	22	11.9786	19456	2.49538e-161	1.52743e-159	196	33	33	1	['TP53']
P53:173:g	263	32	73	32	12.1472	19456	1.82604e-154	1.10321e-152	196	33	33	1	['TP53']
DUF3454:39:P	92	1	46	1	14.0912	19456	9.22413e-148	5.50137e-146	64	3	3	1	['NOTCH1']
P53:100:h	361	76	98	75	12.6041	19456	8.08037e-138	4.69874e-136	196	33	33	1	['TP53']
P53:82:c	367	79	106	78	12.6279	19456	3.2846e-137	1.88642e-135	196	33	33	1	['TP53']
P53:57:p	144	10	39	10	11.2782	19456	1.61844e-117	9.07107e-116	196	33	33	2	['TP63', 'TP53']
Histone:28:s	89	2	89	2	9.67417	19456	2.52984e-115	1.40105e-113	132	61	62	3	['HIST2H3D', 'HIST1H3J', 'H3F3A']
7tm_4:92:r	597	228	486	209	9.54767	19456	6.67554e-112	3.65348e-110	280	469	454	204	['OR2W1', 'OR10W1', 'OR51D1', 'OR4P4', 'OR1A2', 'OR5T2', 'OR6V1', 'OR51B6', 'OR4F6', 'OR5AP2', 'OR13J1', 'OR10AD1', 'OR6C70', 'OR51E2', 'OR8J1', 'OR56A1', 'OR1D2', 'OR5T1', 'OR2G3', 'OR6F1', 'OR6C75', 'OR10K2', 'OR6T1', 'OR2J3', 'OR7G1', 'OR1D5', 'OR5AK2', 'OR8D1', 'OR13C3', 'OR51F1', 'OR9G1', 'OR5T3', 'OR5H1', 'OR10R2', 'OR14A16', 'OR2A14', 'OR5J2', 'OR2Y1', 'OR5AN1', 'OR4D1', 'OR2T3', 'OR13F1',…
Recep_L_domain:54:v	104	4	34	4	10.6436	19456	8.02838e-111	4.34279e-109	112	20	37	1	['ERBB3']
P53:187:r	224	35	61	35	11.9156	19456	2.04425e-110	1.09309e-108	196	33	33	2	['TP63', 'TP53']
SET:19:y	154	15	78	15	9.83445	19456	1.40902e-104	7.36488e-103	169	100	96	3	['KMT2D', 'EZH2', 'EZH1']
zf-C2H2_6:22:k	484	171	249	160	6.77171	19456	6.14436e-102	3.17595e-100	27	782	2521	149	['ZNF311', 'ZNF420', 'ZNF12', 'ZNF71', 'ZNF676', 'ZNF117', 'ZNF345', 'ZNF678', 'ZNF573', 'ZNF91', 'ZNF334', 'ZFP2', 'ZNF404', 'ZNF135', 'ZNF85', 'ZNF492', 'ZNF567', 'ZNF846', 'ZNF208', 'ZNF737', 'ZNF571', 'ZNF273', 'ZNF850', 'ZNF562', 'ZNF93', 'ZNF92', 'ZFP37', 'PRDM5', 'ZNF429', 'ZNF354C', 'ZNF506', 'ZNF140', 'ZNF317', 'ZNF569', 'PRDM1', 'ZNF14', 'ZNF225', 'ZNF121', 'ZNF267', 'ZNF425', 'ZFP62', …
Trypsin:163:n	175	23	77	22	8.79649	19456	4.12058e-98	2.10647e-96	221	210	224	19	['CTSG', 'MASP1', 'TMPRSS5', 'F2', 'PRSS42', 'TMPRSS15', 'TMPRSS9', 'PRSS3', 'TMPRSS11D', 'KLK6', 'CORIN', 'PRSS21', 'PRSS22', 'F11', 'PRSS8', 'PRSS27', 'OVCH1', 'KLK12', 'TPSG1']
7tm_4:187:s	329	90	241	84	8.68802	19456	3.3284e-96	1.68301e-94	280	469	454	156	['OR6C3', 'OR52J3', 'OR8D4', 'OR6N1', 'OR8S1', 'OR51B6', 'OR5H2', 'OR5T2', 'OR5AP2', 'OR4P4', 'OR14A16', 'OR5H6', 'OR51I1', 'OR10H3', 'OR10T2', 'OR51V1', 'OR5B3', 'OR13C3', 'OR4D2', 'OR4F15', 'OR6Q1', 'OR2Z1', 'OR52K1', 'OR4D10', 'OR7E24', 'OR51F2', 'OR2A5', 'OR2V1', 'OR14J1', 'OR5M3', 'OR2T2', 'OR51G2', 'OR1A1', 'OR6A2', 'OR5D14', 'OR1K1', 'OR5M9', 'OR5B12', 'OR1J1', 'OR2L13', 'OR5I1', 'OR2B11',…
P53:193:e	169	22	47	22	11.5091	19456	1.9905e-95	9.85086e-94	196	33	33	2	['TP73', 'TP53']
SPAN-X:35:s	61	1	31	1	11.7614	19456	8.17833e-88	3.96308e-86	95	10	10	2	['SPANXD', 'SPANX-N1']
P53:64:r	182	31	53	31	11.616	19456	3.48012e-84	1.63531e-82	196	33	33	3	['TP63', 'TP73', 'TP53']
Hydrolase_4:35:y	59	1	31	1	9.57584	19456	3.76729e-84	1.75254e-82	239	54	44	3	['ABHD12B', 'ABHD13', 'MGLL']
NPM1-C:44:w	70	2	68	2	14.2819	19456	6.0252e-84	2.77517e-82	49	2	2	1	['NPM1']
Furin-like:92:a	84	4	44	4	11.297	19456	2.34536e-82	1.05928e-80	149	20	19	4	['EGFR', 'ERBB4', 'ERBB3', 'ERBB2']
GF_recep_IV:94:g	58	1	29	1	10.7627	19456	2.49341e-82	1.11532e-80	132	21	19	2	['EGFR', 'ERBB3']
P53:33:s	157	23	44	23	11.4029	19456	1.05698e-81	4.68292e-80	196	33	33	1	['TP53']
PI3Ka:28:e	76	3	72	3	12.0786	19456	1.22691e-80	5.38453e-79	185	10	10	3	['PIK3CD', 'PIK3CA', 'PIK3CB']
MH2:42:r	82	4	77	4	11.5102	19456	1.2897e-79	5.60719e-78	186	16	16	2	['SMAD3', 'SMAD4']
RNA_bind:8:R	56	1	28	1	12.96	19456	1.03721e-78	4.46771e-77	79	15	4	1	['PARN']
zf-CCCH:22:k	99	8	56	8	9.00063	19456	2.90842e-75	1.23e-73	27	88	110	7	['U2AF1', 'ZC3H7A', 'ZFP36L1', 'PARP12', 'MBNL2', 'RBM27', 'ZC3H10']
Pkinase_Tyr:65:k	189	40	84	40	6.41109	19456	1.60023e-72	6.64668e-71	260	1213	1264	36	['NTRK3', 'FGFR2', 'AXL', 'MATK', 'FES', 'JAK2', 'MAP3K10', 'ERBB2', 'FGFR1', 'TNK2', 'PDGFRA', 'EPHA8', 'EGFR', 'RET', 'EPHA7', 'BLK', 'KDR', 'FLJ23356', 'ERBB4', 'IGF1R', 'FGFR4', 'EPHB3', 'MAP3K13', 'RIPK2', 'EPHA4', 'LYN', 'PTK7', 'MLKL', 'DDR1', 'KIT', 'MERTK', 'JAK1', 'NRBP1', 'EPHA2', 'EPHB1', 'PDGFRB']
P53:63:l	211	50	59	50	11.8293	19456	1.86096e-72	7.66124e-71	196	33	33	1	['TP53']
P53:79:v	185	39	53	39	11.6396	19456	2.79518e-71	1.14063e-69	196	33	33	2	['TP53', 'TP73']
P53:38:k	186	43	50	43	11.6474	19456	1.17839e-65	4.68537e-64	196	33	33	2	['TP53', 'TP73']
Acetyltransf_1:86:e	58	2	30	2	9.80116	19456	2.99223e-65	1.17965e-63	117	40	37	3	['AANAT', 'NAA20', 'NAT8']
P53:192:e	158	31	41	31	11.412	19456	3.58484e-65	1.4014e-63	196	33	33	1	['TP53']
P53:101:l	133	22	35	22	11.1635	19456	1.98471e-63	7.69404e-62	196	33	33	1	['TP53']
HAT_KAT11:101:k	47	1	46	1	13.1223	19456	8.00161e-63	3.05111e-61	352	3	3	2	['CREBBP', 'EP300']
7tm_4:63:s	283	97	214	92	8.47074	19456	1.00302e-62	3.79355e-61	280	469	454	133	['OR1L6', 'OR8H1', 'OR5B3', 'OR5M11', 'OR1F1', 'OR52E4', 'OR10Q1', 'OR3A1', 'OR2T1', 'OR2T2', 'OR6F1', 'OR1A1', 'OR51E1', 'OR2M5', 'OR5K2', 'OR6A2', 'OR2A2', 'OR10A3', 'OR5C1', 'OR5I1', 'OR5D16', 'OR8B12', 'OR10AG1', 'OR10H5', 'OR51A7', 'OR4A15', 'OR4P4', 'OR4C12', 'OR1I1', 'OR5B17', 'OR9G4', 'OR2T4', 'OR6C1', 'OR8D1', 'OR5A2', 'OR10S1', 'OR4A5', 'OR52E8', 'OR2AG1', 'OR4C15', 'OR2AG2', 'OR8I2', '…
Collagen:34:G	147	29	115	28	6.58909	19456	1.81676e-60	6.76127e-59	60	175	869	40	['COL24A1', 'COL4A3', 'COL5A1', 'COL11A1', 'COL9A1', 'COL4A5', 'COL23A1', 'COL3A1', 'COL4A4', 'COL4A2', 'COLEC10', 'MBL2', 'COL1A2', 'COL8A1', 'FCN1', 'COL2A1', 'COL6A2', 'COL4A6', 'COL4A1', 'COL18A1', 'COL9A3', 'COL28A1', 'C1QTNF9', 'COL9A2', 'OTOL1', 'FCN2', 'C1QTNF1', 'COL5A3', 'EMID1', 'COL22A1', 'MARCO', 'COL6A1', 'COLEC12', 'COL21A1', 'C1QTNF9B', 'COL13A1', 'COL1A1', 'COL27A1', 'COL14A1', '…
P53:58:p	105	14	30	14	10.8225	19456	5.4536e-59	2.0135e-57	196	33	33	1	['TP53']
Collagen:52:G	134	25	113	24	6.45551	19456	5.6556e-58	2.07164e-56	60	175	869	37	['COL5A2', 'COL7A1', 'COL23A1', 'COL4A5', 'COL4A2', 'COL9A2', 'COL2A1', 'COL20A1', 'COL9A1', 'EMID1', 'COL4A3', 'COL25A1', 'COL22A1', 'COL24A1', 'COL6A2', 'COLEC12', 'COL4A6', 'COL3A1', 'COL12A1', 'COL27A1', 'COL4A4', 'MSR1', 'COL1A1', 'COL6A6', 'COL4A1', 'C1QTNF9B', 'COL11A1', 'COL18A1', 'COL14A1', 'COL1A2', 'COL5A1', 'COL28A1', 'COL17A1', 'COL13A1', 'C1QL1', 'C1QTNF9', 'C1QB']
CTU2:27:T	44	1	22	1	13.0271	19456	1.09731e-57	3.98803e-56	112	3	3	1	['CTU2']
Ion_trans:105:r	198	55	141	54	7.20645	19456	1.59049e-57	5.73564e-56	245	359	763	57	['CACNA1H', 'SCN1A', 'KCNQ1', 'TRPC5', 'SCN3A', 'KCNH6', 'CNGA3', 'KCNS3', 'KCNS1', 'SCN2A', 'CACNA1A', 'KCNB1', 'CNGA1', 'SCN10A', 'CACNA1F', 'KCNC3', 'CACNA1C', 'KCNH5', 'KCNH8', 'SCN4A', 'SCN9A', 'SCN7A', 'NALCN', 'TRPM8', 'HCN4', 'KCNS2', 'SCN11A', 'CACNA1B', 'CACNA1D', 'KCNQ3', 'CACNA1G', 'KCNH7', 'KCNMA1', 'SCN5A', 'CACNA1E', 'TRPV3', 'CATSPER3', 'KCNH2', 'CNGA2', 'TRPV1', 'KCNG4', 'KCNA5',…
Homeobox:4:R	185	49	161	47	7.96977	19456	9.06248e-57	3.24298e-55	57	381	420	76	['PAX7', 'MNX1', 'BARHL1', 'PBX2', 'POU4F3', 'LHX2', 'ALX4', 'CDX1', 'HOXC8', 'POU5F1B', 'DUXA', 'SATB2', 'ZFHX4', 'VENTX', 'ISL1', 'EN1', 'HDX', 'LBX1', 'ALX3', 'LHX9', 'PAX4', 'HOXC9', 'CUX1', 'PBX4', 'DLX6', 'VAX1', 'POU3F4', 'HMBOX1', 'BSX', 'ZFHX2', 'DBX2', 'HOXA9', 'HOXA3', 'ZFHX3', 'HOXA1', 'SHOX', 'GBX2', 'HOXC13', 'MEOX2', 'HOXD3', 'CRX', 'DLX2', 'EVX2', 'HOXC6', 'PITX1', 'HOXA5', 'HOXB2…
P53:102:i	272	98	76	97	12.1957	19456	2.80948e-56	9.97685e-55	196	33	33	1	['TP53']
PI3K_P85_iSH2:129:k	43	1	15	1	11.409	19456	5.41312e-56	1.90771e-54	161	9	9	2	['PIK3R1', 'PIK3R2']
TSP_1:20:R	169	42	139	41	7.79196	19456	1.26361e-55	4.38679e-54	49	105	434	36	['ADAMTSL4', 'UNC5D', 'SEMA5B', 'ADAMTS20', 'THSD4', 'BAI2', 'HMCN1', 'CFP', 'ADAMTS1', 'ADAMTS14', 'ADAMTS13', 'THSD1', 'THSD7A', 'ADAMTS12', 'THSD7B', 'UNC5B', 'ADAMTS18', 'ADAMTS8', 'ISM1', 'ADAMTSL3', 'THBS1', 'THBS2', 'C8orf84', 'SEMA5A', 'ADAMTS19', 'ADAMTS6', 'UNC5C', 'ADAMTS17', 'WISP1', 'BAI3', 'C9', 'CTGF', 'PAPLN', 'ADAMTS3', 'ADAMTS7', 'C6']
P53:41:c	225	72	62	72	11.922	19456	5.9526e-55	2.05122e-53	196	33	33	1	['TP53']
P53_tetramer:21:r	94	12	45	12	10.9523	19456	1.44525e-54	4.94362e-53	42	27	27	1	['TP53']
PI3K_p85B:57:r	57	3	57	3	12.9855	19456	4.41809e-54	1.48935e-52	76	4	4	2	['PIK3CD', 'PIK3CA']
MATH:86:w	57	3	57	3	12.1782	19456	4.41809e-54	1.48935e-52	113	7	7	1	['SPOP']
Collagen:40:G	110	19	77	19	6.17078	19456	5.2604e-51	1.73556e-49	60	175	869	39	['COL8A1', 'COL4A5', 'COL20A1', 'COL28A1', 'COL9A2', 'EMID1', 'COL4A6', 'COL22A1', 'COL4A4', 'MARCO', 'COL9A1', 'COL21A1', 'COL24A1', 'COL4A2', 'OTOL1', 'MSR1', 'COL4A3', 'COL11A1', 'COL5A1', 'COL13A1', 'COL6A2', 'COL2A1', 'COL14A1', 'COL7A1', 'COL16A1', 'MBL2', 'C1QTNF1', 'COL4A1', 'COL9A3', 'COL1A2', 'COL3A1', 'GLDN', 'COL1A1', 'COLEC10', 'COL12A1', 'COL10A1', 'COL5A2', 'COL23A1', 'COL25A1']
DNA_pol3_delta2:58:k	40	1	20	1	11.6672	19456	5.64772e-51	1.83729e-49	163	7	7	1	['RFC3']
NDUF_C2:62:v	40	1	40	1	12.1526	19456	5.64772e-51	1.83729e-49	112	4	5	1	['NDUFC2']
P53:145:c	199	62	54	62	11.7449	19456	1.83782e-50	5.93717e-49	196	33	33	1	['TP53']
Cadherin_tail:117:g	79	9	5	9	10.0641	19456	1.24447e-49	3.9926e-48	133	42	42	15	['PCDHA10', 'PCDHA8', 'PCDHA13', 'PCDHA5', 'PCDHA7', 'PCDHA11', 'PCDHA9', 'PCDHA3', 'PCDHA2', 'PCDHA1', 'PCDHA6', 'PCDHA4', 'PCDHAC2', 'PCDHA12', 'PCDHAC1']
Collagen:22:G	132	29	102	29	6.43381	19456	1.94322e-49	6.19169e-48	60	175	869	39	['COL2A1', 'COL11A1', 'COL4A6', 'COL13A1', 'COL4A1', 'COL9A2', 'COL4A5', 'COL3A1', 'GLDN', 'COL4A2', 'COL1A1', 'COL22A1', 'COL18A1', 'COL8A1', 'COL4A3', 'COL21A1', 'COL14A1', 'COLEC12', 'COL6A2', 'COL6A1', 'COL4A4', 'MSR1', 'COL5A2', 'C1QTNF2', 'SFTPD', 'EMID1', 'CCBE1', 'C1QTNF8', 'SCARA3', 'OTOL1', 'COL28A1', 'COL24A1', 'ADIPOQ', 'COL23A1', 'COL1A2', 'COL9A1', 'MBL2', 'COL5A1', 'COL5A3']
PGM_PMM_I:76:l	47	2	47	2	11.0068	19456	4.7034e-49	1.48845e-47	138	10	13	1	['PGM5']
Pkinase:252:R	176	51	126	51	6.27555	19456	6.72032e-49	2.11236e-47	264	1221	1293	89	['TLK1', 'ACVR1B', 'STK35', 'CDK14', 'TSSK1B', 'NEK2', 'CAMK4', 'DYRK2', 'MOS', 'WEE2', 'TAOK1', 'PIM2', 'IKBKB', 'RPS6KB1', 'PRKACB', 'ADRBK2', 'CLK2', 'CDK13', 'MAPK9', 'HIPK4', 'DCLK3', 'PRKAA2', 'NUAK1', 'TRIB2', 'RPS6KA3', 'DYRK1A', 'CDC42BPB', 'SGK2', 'DYRK3', 'PRKD2', 'NEK9', 'PNCK', 'MAPK13', 'CDC42BPA', 'TTN', 'CHUK', 'ROCK2', 'CHEK2', 'PRKACG', 'RPS6KA1', 'MAP2K1', 'LATS1', 'PDIK1L', 'C…
P53:188:d	144	35	39	35	11.2782	19456	9.64923e-49	3.01263e-47	196	33	33	1	['TP53']
Helicase_C:109:R	81	10	58	10	7.86312	19456	2.60099e-48	8.06653e-47	111	196	198	22	['DDX41', 'DDX4', 'SHPRH', 'DDX53', 'CHD4', 'DDX28', 'SRCAP', 'ATRX', 'YTHDC2', 'CHD7', 'SMARCA2', 'SMARCA4', 'DDX31', 'INOC1', 'DHX35', 'BTAF1', 'DDX49', 'DDX3X', 'CHD1', 'DHX29', 'DDX17', 'CHD5']
Keratin_B2_2:7:c	66	6	61	6	7.58969	19456	1.21583e-47	3.74572e-46	45	53	195	11	['KRTAP4-5', 'KRTAP2-1', 'KRTAP5-2', 'KRTAP9-7', 'KRTAP10-9', 'KRTAP4-11', 'KRTAP16-1', 'KRTAP10-6', 'KRTAP9-4', 'KRTAP4-3', 'KRTAP4-8']
wnt:113:g	57	4	51	4	10.2851	19456	2.4349e-47	7.45207e-46	306	26	26	6	['WNT7B', 'WNT2', 'WNT16', 'WNT9A', 'WNT1', 'WNT11']
Trypsin:60:k	135	32	61	31	8.42209	19456	5.79151e-47	1.76092e-45	221	210	224	20	['PRSS3', 'F11', 'TMPRSS3', 'ELANE', 'PRSS54', 'TMPRSS15', 'HABP2', 'TMPRSS7', 'KLK2', 'PRSS55', 'PRSS1', 'TMPRSS9', 'KLK6', 'CELA3B', 'PRSS53', 'GZMM', 'GZMA', 'OVCH1', 'KLK8', 'MASP1']
Collagen:37:G	104	19	84	19	6.08986	19456	3.50172e-46	1.05779e-44	60	175	869	32	['MSR1', 'COL9A3', 'C1QB', 'COL4A3', 'COL7A1', 'COL4A4', 'COL4A1', 'COL3A1', 'COL4A6', 'COL4A2', 'COL23A1', 'C1QTNF1', 'COL21A1', 'COL11A1', 'COL2A1', 'COL8A1', 'COL22A1', 'CCBE1', 'COL24A1', 'FCN1', 'ADIPOQ', 'COL9A2', 'COL5A1', 'COL4A5', 'COL6A1', 'COL9A1', 'COL5A3', 'COL20A1', 'COL13A1', 'COL12A1', 'COL6A2', 'COL17A1']
Collagen:7:G	113	23	87	22	6.2096	19456	1.26468e-45	3.79568e-44	60	175	869	37	['COL4A2', 'COL4A3', 'COL3A1', 'COL4A6', 'COL22A1', 'COL11A1', 'COL27A1', 'COL4A5', 'COL16A1', 'C1QTNF9', 'COL25A1', 'MSR1', 'COL14A1', 'MARCO', 'COL6A1', 'COL9A3', 'COL8A2', 'COL17A1', 'COL4A4', 'COL1A1', 'COL9A1', 'COL5A1', 'COL23A1', 'COLEC10', 'C1QTNF3', 'OTOL1', 'COL9A2', 'COL24A1', 'COL4A1', 'COL28A1', 'COL6A2', 'COL5A3', 'ADIPOQ', 'COL8A1', 'COL1A2', 'COL6A6', 'COLEC12']
P53:151:g	153	42	44	42	11.3656	19456	1.95432e-45	5.82789e-44	196	33	33	2	['TP53', 'TP63']
Pkinase:84:e	173	53	94	53	6.25075	19456	5.18792e-45	1.53721e-43	264	1221	1293	35	['MAP2K4', 'IRAK3', 'CAMKV', 'RIPK4', 'MAPK8', 'TRIO', 'MAST3', 'PRKAA2', 'ICK', 'UHMK1', 'CHEK2', 'DYRK3', 'PRKCB', 'RPS6KA1', 'ENSG00000168038', 'STK16', 'PBK', 'MAP3K1', 'TGFBR1', 'PRKG2', 'CAMK2D', 'PIM1', 'STK33', 'NEK10', 'MAPK7', 'PRKCD', 'MARK2', 'MAP2K1', 'LRRK2', 'SIK2', 'CAMKK1', 'STK3', 'CDC42BPG', 'SRPK3', 'MST4']
DEP:5:k	44	2	24	2	8.34527	19456	8.07203e-45	2.37665e-43	72	70	77	4	['RGS6', 'PREX2', 'RGS7', 'DVL3']
Forkhead:3:p	59	5	33	5	8.73149	19456	1.96435e-44	5.74728e-43	82	78	79	10	['FOXR2', 'FOXO1', 'FOXS1', 'FOXF2', 'FOXA3', 'FOXP2', 'FOXD4L4', 'FOXL1', 'LOC442425', 'FOXD4L5']
P53:179:v	156	45	44	43	11.3936	19456	9.11177e-44	2.63279e-42	196	33	33	1	['TP53']
HPIP:83:v	35	1	19	1	12.6969	19456	7.8939e-43	2.26682e-41	133	2	3	1	['HCFC1R1']
Ras:143:A	158	47	93	47	8.31686	19456	9.67495e-43	2.76122e-41	162	274	282	21	['DIRAS2', 'RAC1', 'RAB40A', 'RAB20', 'RHOA', 'KRAS', 'RAB41', 'RHOV', 'RAB17', 'RAN', 'RERG', 'RHOF', 'RALA', 'EFCAB4B', 'RRAD', 'RAB35', 'RAB40C', 'RASD1', 'RAB1B', 'RHOD', 'DIRAS3']
Pkinase_Tyr:250:R	111	24	91	24	5.64326	19456	1.79039e-42	5.07861e-41	260	1213	1264	38	['MET', 'PTK2B', 'AXL', 'ABL2', 'DDR1', 'HCK', 'DDR2', 'SRMS', 'GUCY2F', 'ROS1', 'TYK2', 'TXK', 'MAP3K7', 'MST1R', 'ITK', 'EPHA2', 'BTK', 'LCK', 'NRBP1', 'FLT4', 'TNK2', 'PTK2', 'GUCY2C', 'EGFR', 'ARAF', 'TEX14', 'STYK1', 'TESK1', 'MAP3K13', 'JAK3', 'ACVR1C', 'JAK2', 'ERBB3', 'FER', 'EPHA5', 'TGFBR2', 'EPHB4', 'BMX']
Pkinase_Tyr:71:t	133	35	128	35	5.90413	19456	1.38554e-41	3.88286e-40	260	1213	1264	10	['INSR', 'MAP3K12', 'NTRK2', 'TESK1', 'MAP3K13', 'NTRK3', 'KSR2', 'TYK2', 'PTK2B', 'JAK2']
Furin-like:118:e	52	4	39	4	10.6051	19456	2.12927e-41	5.89605e-40	149	20	19	2	['ERBB2', 'ERBB3']
P53:141:y	199	72	57	72	11.7449	19456	2.28521e-41	6.29042e-40	196	33	33	1	['TP53']
DUF4561:65:i	34	1	17	1	13.2401	19456	3.09699e-41	8.42527e-40	166	2	2	1	['C9orf9']
Ig_4:32:t	34	1	34	1	12.2401	19456	3.09699e-41	8.42527e-40	76	76	4	1	['CD3G']
Gal_Lectin:65:d	56	5	56	5	10.7121	19456	4.33911e-41	1.17358e-39	80	17	19	2	['PKD1L2', 'C21orf63']
P53:69:y	216	84	58	84	11.8631	19456	3.1601e-40	8.49755e-39	196	33	33	1	['TP53']
P53:112:y	167	55	45	54	11.4919	19456	9.85925e-40	2.63593e-38	196	33	33	1	['TP53']
Collagen:43:G	122	31	90	30	6.32015	19456	1.00813e-39	2.6799e-38	60	175	869	34	['COL14A1', 'COLEC10', 'COL1A2', 'COL22A1', 'COL9A1', 'COL4A5', 'MARCO', 'COL4A3', 'COL4A2', 'COL4A6', 'COL6A6', 'COL15A1', 'COL7A1', 'COL24A1', 'COL11A1', 'COL4A4', 'OTOL1', 'COL3A1', 'COL9A3', 'COL25A1', 'COL9A2', 'COL4A1', 'COL12A1', 'COL13A1', 'C1QC', 'COL6A3', 'C1QA', 'COL27A1', 'COL10A1', 'COL5A2', 'COL8A1', 'COL2A1', 'SCARA3', 'COL5A1']
Glyco_transf_8:150:l	40	2	21	2	10.1526	19456	2.60148e-39	6.87619e-38	256	20	20	3	['GLT8D1', 'GXYLT1', 'Q8IXV1']
Collagen:13:G	102	22	90	22	6.06184	19456	2.9302e-39	7.7013e-38	60	175	869	37	['COL4A6', 'COL7A1', 'COL4A4', 'COL3A1', 'COL5A1', 'COL9A1', 'COL1A2', 'COL25A1', 'COL11A1', 'COL4A5', 'COL14A1', 'COL4A1', 'SCARA3', 'GLDN', 'COL22A1', 'COL24A1', 'COL5A2', 'COL6A6', 'COL27A1', 'COL6A1', 'COL4A3', 'COL28A1', 'FCN1', 'COL13A1', 'COL4A2', 'COL6A2', 'C1QTNF2', 'COL5A3', 'COL2A1', 'COL23A1', 'COL1A1', 'MSR1', 'CCBE1', 'COL18A1', 'COL6A3', 'COL8A1', 'OTOL1']
Pou:49:a	54	5	29	5	9.86312	19456	6.73969e-39	1.75157e-37	72	32	33	5	['POU2F1', 'POU3F2', 'POU3F4', 'POU4F2', 'POU3F3']
Cystatin:90:k	32	1	31	1	9.29465	19456	4.36602e-38	1.12837e-36	92	23	29	4	['KNG1', 'CST8', 'CST9L', 'AHSG']
CCDC66:79:r	39	2	28	2	13.438	19456	5.83582e-38	1.4999e-36	154	2	2	1	['CCDC66']
Ion_trans:102:r	181	66	131	65	7.07694	19456	2.31213e-37	5.8776e-36	245	359	763	54	['SLC9A10', 'CNGA4', 'CACNA1C', 'KCNA7', 'SCN2A', 'CACNA1I', 'CACNA1S', 'KCND1', 'TPCN2', 'CACNA1B', 'RYR2', 'CACNA1E', 'CACNA1G', 'KCNU1', 'TRPC3', 'SCN3A', 'KCNC4', 'ENSG00000254809', 'HVCN1', 'SCN5A', 'CACNA1D', 'KCNA4', 'KCNV1', 'SCN4A', 'SCN1A', 'SCN7A', 'KCNH6', 'CACNA1H', 'HCN4', 'KCNB1', 'HCN1', 'KCNC3', 'NALCN', 'SCN11A', 'CACNA1F', 'KCNH5', 'CACNA1A', 'TRPM5', 'KCNH2', 'KCNH4', 'KCNC1',…
P53:149:c	184	68	50	68	11.6318	19456	3.14769e-37	7.95818e-36	196	33	33	1	['TP53']
Collagen:31:G	112	28	104	27	6.19677	19456	3.17141e-37	7.9748e-36	60	175	869	40	['C1QL1', 'COL17A1', 'COL11A1', 'COL13A1', 'COL1A1', 'COLEC12', 'FCN1', 'COL4A3', 'COL18A1', 'COL4A6', 'COL6A2', 'COL9A2', 'COL22A1', 'COL9A1', 'COL4A5', 'COL4A1', 'CCBE1', 'COL4A4', 'COL12A1', 'SFTPD', 'MARCO', 'COL1A2', 'COL9A3', 'C1QB', 'COL5A1', 'COL23A1', 'COL28A1', 'COL7A1', 'C1QTNF9', 'EMID1', 'COL4A2', 'C1QTNF1', 'COL6A1', 'COL15A1', 'COL24A1', 'COL10A1', 'COL16A1', 'COL21A1', 'C1QTNF2', …
Pkinase:122:r	174	62	119	59	6.25907	19456	3.57424e-37	8.93944e-36	264	1221	1293	80	['CSNK1G1', 'STK31', 'MAST3', 'CAMK4', 'RPS6KC1', 'SGK1', 'ACVR1B', 'CSNK1E', 'IKBKB', 'NEK11', 'MAPKAPK3', 'RPS6KA4', 'MAPK8', 'MAP2K3', 'AKT2', 'CLK2', 'CDK20', 'MYO3B', 'DCLK1', 'RPS6KA2', 'STK4', 'CHUK', 'RIPK3', 'GRK7', 'CAMKK2', 'MARK2', 'TNIK', 'MAPK4', 'PRKG2', 'PNCK', 'GSK3A', 'CHEK2', 'BMP2K', 'WEE1', 'MST4', 'NEK2', 'WNK1', 'PHKG2', 'CDKL1', 'CDK16', 'RPS6KA6', 'TSSK3', 'HIPK1', 'TRIB1…
G-alpha:212:q	56	6	46	6	9.91559	19456	4.91587e-37	1.22292e-35	354	35	33	4	['GNAQ', 'GNAI3', 'GNAS', 'GNA11']
PI3K_P85_iSH2:126:n	31	1	11	1	10.9369	19456	1.56607e-36	3.87519e-35	161	9	9	2	['PIK3R1', 'PIK3R2']
zf-C2H2:12:r	547	341	429	300	6.55323	19456	2.21893e-36	5.46161e-35	23	1207	3315	194	['SP5', 'ZNF347', 'ENSG00000221895', 'ZNF665', 'ZNF480', 'ZNF660', 'ZNF135', 'ZNF236', 'ZFP2', 'ZNF587', 'ZNF420', 'ZNF624', 'ZNF192', 'ZNF780B', 'ZNF146', 'ZNF205', 'ZNF544', 'ZNF16', 'ZNF581', 'ZNF561', 'ZNF470', 'ZNF780A', 'ZNF845', 'ZNF233', 'ZNF569', 'ZNF629', 'ZNF766', 'ZNF546', 'ZNF48', 'ZNF35', 'ZNF91', 'ZNF679', 'ZKSCAN2', 'ZNF493', 'HIC2', 'ZNF251', 'ZNF491', 'ZNF697', 'RBAK', 'KLF3', '…
Collagen:25:G	88	18	73	17	5.84885	19456	9.19992e-36	2.24073e-34	60	175	869	32	['COL4A4', 'COL11A1', 'C1QTNF6', 'COL4A2', 'COL4A5', 'COL22A1', 'EMID1', 'COL4A1', 'MSR1', 'FCN2', 'COL18A1', 'COL4A6', 'COL13A1', 'COL5A2', 'FCN1', 'MBL2', 'SFTPD', 'CTHRC1', 'SCARA3', 'C1QTNF1', 'COL15A1', 'COL9A1', 'COL6A2', 'COL10A1', 'COL24A1', 'OTOL1', 'COL3A1', 'COL6A1', 'COL14A1', 'C1QTNF3', 'COL7A1', 'COL2A1']
Cadherin_tail:93:s	64	9	4	9	9.76031	19456	2.45395e-35	5.94572e-34	133	42	42	15	['PCDHA13', 'PCDHA8', 'PCDHA10', 'PCDHAC2', 'PCDHA2', 'PCDHA1', 'PCDHA6', 'PCDHA12', 'PCDHA7', 'PCDHA4', 'PCDHA5', 'PCDHA11', 'PCDHA9', 'PCDHAC1', 'PCDHA3']
P53:182:c	180	68	51	68	11.6001	19456	2.64604e-35	6.37792e-34	196	33	33	1	['TP53']
Iso_dh:96:a	42	3	41	3	11.223	19456	5.00354e-35	1.19367e-33	348	10	10	2	['IDH1', 'IDH2']
DSPn:114:l	30	1	10	1	10.6001	19456	5.44189e-35	1.28506e-33	141	11	11	1	['CDC14A']
RGS12_us2:73:k	30	1	15	1	11.2522	19456	5.44189e-35	1.28506e-33	75	7	7	1	['RGS12']
Y_phosphatase:6:R	46	4	31	4	7.13703	19456	1.52454e-34	3.58191e-33	235	152	186	15	['PTPRB', 'PTPRH', 'PTPRD', 'PTPN7', 'PTPRF', 'PTPRR', 'PTPRO', 'PTPRZ1', 'PTPRN', 'PTPN5', 'PTPRA', 'PTPRK', 'PTPN14', 'PTPRJ', 'PTPN6']
Bromodomain:43:k	60	8	25	8	7.28473	19456	1.8621e-34	4.353e-33	84	143	219	7	['BRWD1', 'TAF1', 'BAZ1A', 'PBRM1', 'CREBBP', 'ZMYND8', 'TAF1L']
P53:122:s	92	21	28	21	10.6318	19456	9.27609e-34	2.13626e-32	196	33	33	2	['TP73', 'TP53']
DUF3513:95:a	29	1	10	1	10.1037	19456	1.83001e-33	4.13263e-32	195	15	15	3	['BCAR1', 'NEDD9', 'CASS4']
MRVI1:466:t	29	1	29	1	10.5512	19456	1.83001e-33	4.13263e-32	533	11	11	1	['MRVI1']
PAZ:84:q	29	1	29	1	9.92315	19456	1.83001e-33	4.13263e-32	138	17	17	2	['EIF2C3', 'EIF2C1']
FGGY_C:3:v	29	1	29	1	9.92315	19456	1.83001e-33	4.13263e-32	198	17	17	1	['GK2']
Collagen:46:G	104	27	90	27	6.08986	19456	2.28286e-33	5.13036e-32	60	175	869	34	['COL9A2', 'COL8A1', 'COL12A1', 'COL3A1', 'COL7A1', 'COL5A1', 'COL21A1', 'COLEC10', 'COL4A1', 'COL1A1', 'COL4A6', 'COL18A1', 'C1QTNF9', 'COL2A1', 'COL11A1', 'COL6A1', 'COL27A1', 'COL4A3', 'COL4A2', 'COL22A1', 'COL4A5', 'COL16A1', 'COL9A1', 'COL13A1', 'C1QTNF7', 'COL1A2', 'COL4A4', 'C1QB', 'MARCO', 'COL6A2', 'COL5A2', 'EMID1', 'OTOL1', 'COL24A1']
PH:12:s	113	32	90	32	6.9449	19456	7.37667e-33	1.64982e-31	105	511	522	22	['PREX2', 'ARHGAP15', 'ARHGEF16', 'MPRIP', 'FAM109B', 'FGD6', 'VAV1', 'RASA2', 'AKT3', 'PLEKHO2', 'ARAP2', 'AKT2', 'AKT1', 'GAB1', 'PLEKHB2', 'AFAP1', 'AFAP1L1', 'ACAP1', 'IPCEF1', 'PLEKHD1', 'DOK1', 'FARP2']
Chorein_N:56:k	28	1	9	1	9.43642	19456	5.94897e-32	1.29321e-30	116	23	23	1	['VPS13B']
DUF4371:232:G	28	1	28	1	11.1526	19456	5.94897e-32	1.29321e-30	236	7	7	1	['FAM200A']
Aminotran_4:105:r	28	1	28	1	11.1526	19456	5.94897e-32	1.29321e-30	223	7	7	1	['BCAT2']
P53:144:m	174	69	46	69	11.5512	19456	9.06359e-32	1.96111e-30	196	33	33	1	['TP53']
Helicase_C:106:R	70	13	57	13	7.65256	19456	3.10277e-31	6.65165e-30	111	196	198	35	['DDX27', 'ASCC3', 'DHX30', 'DDX42', 'DDX25', 'EIF4A1', 'CHD8', 'CHD5', 'EIF4A2', 'HELLS', 'IFIH1', 'SMARCA4', 'DDX4', 'BTAF1', 'DDX41', 'TTF2', 'RECQL5', 'DHX58', 'DHX36', 'DDX43', 'DHX38', 'DDX50', 'DDX60L', 'DDX39A', 'TDRD9', 'DDX46', 'DHX9', 'SKIV2L2', 'DDX47', 'DDX55', 'ZRANB3', 'SRCAP', 'DDX58', 'RAD54L2', 'DDX60']
PTEN_C2:50:e	46	5	43	5	9.7693	19456	1.82994e-30	3.88716e-29	135	30	30	3	['TPTE2', 'PTEN', 'TENC1']
Fox-1_C:26:r	27	1	10	1	9.82005	19456	1.86724e-30	3.94837e-29	96	17	17	2	['RBFOX1', 'RBFOX2']
Hexokinase_2:87:r	38	3	17	3	10.0082	19456	2.6321e-30	5.54051e-29	239	12	21	4	['HK3', 'HK1', 'HK2', 'GCK']
IQ:17:R	66	12	58	12	7.1581	19456	4.66405e-30	9.72967e-29	21	109	263	21	['MYO5B', 'IQGAP3', 'SPATA17', 'ASPM', 'MYO5A', 'MYO1A', 'MYO1B', 'IQCF1', 'IQCF2', 'MYO7A', 'MYO5C', 'KIAA1683', 'IQGAP2', 'IQCE', 'SPA17', 'IQGAP1', 'IQCG', 'MYO3B', 'IQCF5', 'MYO7B', 'IQCF3']
HLH:2:R	63	11	34	11	7.36172	19456	1.05283e-29	2.1865e-28	55	218	218	14	['TCF12', 'MLXIP', 'MITF', 'TCF4', 'TFEC', 'OLIG2', 'ATOH1', 'ATOH8', 'NEUROG1', 'KIAA2018', 'ARNTL2', 'ARNT', 'NHLH1', 'TFAP4']
Pkinase:226:k	129	44	117	43	5.82735	19456	1.06308e-29	2.19798e-28	264	1221	1293	20	['DYRK3', 'MAST1', 'CDK16', 'MAPK6', 'CDKL5', 'CAMK1', 'NUAK1', 'CDK8', 'STK10', 'MAP3K9', 'SgK269', 'CAMK2G', 'MOS', 'CLK4', 'CDC42BPB', 'MAPKAPK2', 'TSSK1B', 'ACVR2A', 'ULK3', 'RPS6KA4']
Collagen:28:G	102	29	79	29	6.06184	19456	1.07234e-29	2.20732e-28	60	175	869	43	['COL18A1', 'COL4A6', 'C1QTNF9B', 'C1QA', 'OTOL1', 'COL7A1', 'COL13A1', 'COL22A1', 'COL9A1', 'COL3A1', 'COL5A2', 'COL2A1', 'COL24A1', 'COL4A5', 'COL6A3', 'COL16A1', 'COL4A4', 'COL1A2', 'MSR1', 'CCBE1', 'COL9A2', 'COL15A1', 'COL4A3', 'COL1A1', 'COL14A1', 'COL8A1', 'COL25A1', 'SFTPD', 'C1QC', 'COL6A2', 'COL9A3', 'COL27A1', 'C1QTNF7', 'COLEC10', 'COL28A1', 'COL6A6', 'MARCO', 'GLDN', 'COL11A1', 'COL8…
Pkinase:48:E	118	38	72	38	5.69877	19456	2.11979e-29	4.34417e-28	264	1221	1293	60	['TTBK1', 'PAK7', 'DCLK1', 'STRADB', 'CDK15', 'PRKACG', 'CDKL1', 'MAPK12', 'CAMKK2', 'CSNK1A1L', 'VRK2', 'MAP3K6', 'MGC42105', 'GAK', 'CSNK2A2', 'GRK5', 'MAP4K1', 'CAMKV', 'WEE2', 'ROCK2', 'PKN1', 'BMP2K', 'SGK1', 'PRKCB', 'HIPK4', 'NEK9', 'IKBKB', 'AMHR2', 'CDK17', 'TTK', 'SBK2', 'MAP2K3', 'DYRK1A', 'STRADA', 'ACVR2A', 'CSNK1A1', 'MYLK4', 'LRRK1', 'MAP3K15', 'IRAK3', 'PKN3', 'MAP2K4', 'SgK495', …
Ras:25:k	135	48	82	48	8.08989	19456	2.59482e-29	5.29434e-28	162	274	282	15	['RAB30', 'RABL2B', 'RAC1', 'DIRAS2', 'RAB32', 'RAB19B', 'RAC2', 'RASEF', 'RHOC', 'GEM', 'RAP2B', 'RIT2', 'RHOJ', 'RAB6B', 'RAB40A']
Collagen:19:G	101	29	83	29	6.04763	19456	4.24776e-29	8.55437e-28	60	175	869	34	['OTOL1', 'COL22A1', 'MBL2', 'COL3A1', 'COL4A3', 'COL4A5', 'COL9A2', 'COL4A6', 'COL5A2', 'COL7A1', 'COL5A1', 'COL4A4', 'COL15A1', 'MSR1', 'COL23A1', 'COL9A1', 'COL4A2', 'COLEC11', 'CCBE1', 'C1QTNF8', 'COL27A1', 'COL1A1', 'COL14A1', 'COL13A1', 'SFTPD', 'COL11A1', 'COL4A1', 'SCARA3', 'C1QB', 'C1QC', 'COL1A2', 'C1QTNF9B', 'COL6A2', 'EMID1']
Keratin_B2:75:t	26	1	26	1	9.53114	19456	5.65171e-29	1.13326e-27	164	26	20	3	['KRTAP1-5', 'KRTAP1-4', 'KRTAP1-3']
Collagen:58:g	59	10	50	10	5.27206	19456	1.42395e-28	2.83086e-27	60	175	869	25	['COL6A6', 'COL13A1', 'COL1A2', 'COL4A4', 'COL27A1', 'COL9A1', 'COL4A1', 'COL3A1', 'MBL2', 'C1QTNF7', 'ADIPOQ', 'COL14A1', 'COL4A6', 'C1QTNF9B', 'COL22A1', 'MARCO', 'COL20A1', 'COL11A1', 'COL4A3', 'COL6A2', 'OTOL1', 'COL4A2', 'COL6A1', 'COL7A1', 'COL4A5']
7tm_1:82:R	189	84	166	80	6.99548	19456	1.87422e-28	3.71016e-27	268	839	843	86	['OPN1SW', 'P2RY2', 'CXCR7', 'GPR84', 'CXCR2', 'AVPR1B', 'P2RY12', 'GPR153', 'OPN3', 'SUCNR1', 'HCRTR2', 'F2R', 'GPR87', 'GPR139', 'UTS2R', 'TAAR2', 'FFAR1', 'HRH1', 'LHCGR', 'MRGPRX3', 'AVPR1A', 'C3AR1', 'GALR1', 'FPR3', 'RGR', 'OPRL1', 'ADRA1B', 'P2RY13', 'CMKLR1', 'GPR75', 'OPRD1', 'GPR37L1', 'CYSLTR2', 'NPBWR1', 'LPAR5', 'P2RY11', 'TAAR5', 'GPR50', 'SSTR1', 'RRH', 'NPSR1', 'CCKBR', 'GPR61', '…
Ion_trans:99:r	164	68	119	67	6.93464	19456	5.32543e-28	1.04092e-26	245	359	763	41	['CACNA1E', 'CACNA1C', 'SCN9A', 'HCN1', 'KCNV1', 'SCN1A', 'HCN4', 'KCNC3', 'CACNA1F', 'SCN11A', 'TPCN1', 'CACNA1I', 'SCN8A', 'SCN5A', 'KCNQ4', 'SCN2A', 'SCN7A', 'KCNA1', 'KCNA5', 'KCNF1', 'SCN10A', 'KCNA7', 'CNGA4', 'KCNQ5', 'TPCN2', 'KCND3', 'CACNA1H', 'KCNG4', 'KCNQ3', 'HVCN1', 'CNGA3', 'CACNA1D', 'NALCN', 'SCN3A', 'CACNA1S', 'KCNV2', 'KCNG1', 'SCN4A', 'KCNS1', 'CNGA2', 'KCND2']
zf-C2H2_4:21:k	106	33	87	30	5.94834	19456	1.04115e-27	2.02655e-26	24	1179	977	48	['ZSCAN10', 'SNAI2', 'ZNF492', 'ZNF561', 'ZNF551', 'ZNF778', 'ZNF433', 'ZNF317', 'ZNF878', 'ZNF557', 'SALL1', 'PRDM15', 'GZF1', 'ZNF341', 'ZNF560', 'ZNF689', 'ZNF799', 'ZNF77', 'ZNF57', 'ZNF679', 'ZNF564', 'ZNF844', 'ZNF333', 'ZNF669', 'ZNF441', 'ZNF879', 'KLF13', 'ZNF121', 'ZNF442', 'ZNF124', 'OVOL2', 'ZNF710', 'HINFP', 'ZNF823', 'ZNF497', 'GFI1B', 'ZNF436', 'ZBTB26', 'PRDM5', 'ZNF596', 'PLAG1',…
Collagen:49:G	83	21	72	21	5.76446	19456	1.06742e-27	2.06902e-26	60	175	869	34	['COL25A1', 'COL23A1', 'COL22A1', 'C1QTNF9', 'C1QTNF3', 'COL24A1', 'COLEC10', 'OTOL1', 'MSR1', 'COL28A1', 'COL4A5', 'COLEC12', 'COL14A1', 'COL9A2', 'COL4A2', 'COL1A1', 'COL4A3', 'COL10A1', 'MARCO', 'EMID1', 'COL4A6', 'COL7A1', 'C1QB', 'COL4A4', 'COL6A1', 'COL9A1', 'COL3A1', 'COL6A2', 'COL5A2', 'COL11A1', 'COL20A1', 'COL4A1', 'COL8A1', 'COL5A1']
Galactosyl_T:110:s	31	2	31	2	9.64739	19456	1.41764e-27	2.70281e-26	195	23	22	3	['B3GALT1', 'B3GALT6', 'B3GNT9']
zf-FCS:26:d	31	2	30	2	8.01936	19456	1.41764e-27	2.70281e-26	41	22	68	3	['ZMYM6', 'ZMYM1', 'ZMYM3']
FAA_hydrolase:185:s	31	2	31	2	11.2995	19456	1.41764e-27	2.70281e-26	218	7	7	2	['FAHD2A', 'FAHD2B']
PI3K_C2:107:e	25	1	24	1	10.9891	19456	1.64736e-27	3.11524e-26	136	8	7	1	['PIK3CA']
Peptidase_S8:95:k	25	1	17	1	9.33705	19456	1.64736e-27	3.11524e-26	298	23	22	5	['PCSK5', 'PCSK2', 'PCSK9', 'PCSK7', 'FURIN']
OLF:39:k	43	5	18	5	9.57889	19456	1.8892e-27	3.55813e-26	247	32	32	3	['OLFM3', 'LPHN1', 'LPHN2']
Collagen:4:G	86	23	79	22	5.81568	19456	4.87106e-27	9.10047e-26	60	175	869	34	['GLDN', 'COL10A1', 'COL4A5', 'C1QA', 'MARCO', 'COL4A4', 'COL16A1', 'COL11A1', 'COL25A1', 'EMID1', 'COL7A1', 'COL4A3', 'COL2A1', 'COL21A1', 'COL22A1', 'COL5A3', 'COL27A1', 'COL3A1', 'COL4A6', 'COL12A1', 'SFTPD', 'COL13A1', 'COL8A1', 'COL18A1', 'COL4A1', 'COL14A1', 'COL9A2', 'COL5A1', 'COLEC12', 'COL24A1', 'COL23A1', 'C1QTNF2', 'COL1A2', 'COL28A1']
Myosin_head:434:e	39	4	26	4	7.63068	19456	5.64496e-27	1.05041e-25	677	99	112	8	['MYO16', 'MYH7B', 'MYO7B', 'MYO1G', 'MYO1B', 'MYO1F', 'MYH4', 'MYH9']
PI3K_C2:69:e	35	3	33	3	11.4746	19456	6.97753e-27	1.29321e-25	136	8	7	1	['PIK3CA']
Pkinase_Tyr:162:k	99	30	45	30	5.47821	19456	7.70631e-27	1.42261e-25	260	1213	1264	24	['JAK1', 'INSRR', 'FGFR4', 'CSF1R', 'FGFR3', 'FGFR2', 'MERTK', 'NTRK3', 'RIPK1', 'ACVRL1', 'FGFR1', 'LCK', 'ROS1', 'EPHA7', 'ROR2', 'FLT1', 'ERBB2', 'FLT4', 'NTRK2', 'PDGFRB', 'EPHB2', 'KSR2', 'YES1', 'EPHA1']
P53:65:a	106	34	29	34	10.8362	19456	1.02309e-26	1.87378e-25	196	33	33	2	['TP53', 'TP63']
Pkinase_Tyr:128:r	106	34	68	32	5.57677	19456	1.02309e-26	1.87378e-25	260	1213	1264	40	['BTK', 'EPHA3', 'FGFR2', 'TNK2', 'ABL1', 'FGFR3', 'DSTYK', 'TGFBR2', 'TEX14', 'EPHA8', 'TXK', 'LYN', 'ARAF', 'EPHA1', 'EPHB1', 'AXL', 'EGFR', 'SRMS', 'RET', 'ERBB4', 'ACVRL1', 'CSK', 'NTRK1', 'FES', 'LCK', 'LIMK2', 'EPHA6', 'ACVR1C', 'GUCY2F', 'MAP3K13', 'ALK', 'DDR1', 'MST1R', 'JAK1', 'JAK3', 'EPHA4', 'DDR2', 'NTRK2', 'MUSK', 'MLKL']
E2F_TDP:45:R	30	2	24	2	9.20154	19456	2.46535e-26	4.41108e-25	71	25	29	6	['TFDP1', 'E2F1', 'TFDP2', 'E2F2', 'E2F7', 'TFDP3']
Band_3_cyto:243:r	30	2	11	2	8.30463	19456	2.46535e-26	4.41108e-25	268	50	54	1	['SLC4A10']
ATG_C:81:n	30	2	10	2	10.4746	19456	2.46535e-26	4.41108e-25	96	12	12	1	['VPS13A']
Aminotran_1_2:225:l	30	2	30	2	8.97206	19456	2.46535e-26	4.41108e-25	363	35	34	3	['CCBL1', 'GOT2', 'SPTLC2']
RGS12_usC:58:q	24	1	13	1	11.7376	19456	4.61727e-26	8.1983e-25	144	4	4	1	['RGS12']
RNA_POL_M_15KD:23:e	24	1	24	1	12.7376	19456	4.61727e-26	8.1983e-25	36	2	2	1	['POLR3K']
WH2:5:R	38	4	36	4	8.94113	19456	6.18083e-26	1.09328e-24	30	33	44	5	['COBL', 'LMOD1', 'WASF3', 'WIPF2', 'WIPF3']
Patched:386:a	34	3	9	3	8.88254	19456	9.13833e-26	1.61028e-24	811	28	41	3	['PTCH2', 'PTCH1', 'PTCHD3']
P53:174:r	109	37	29	37	10.8764	19456	1.60596e-25	2.81922e-24	196	33	33	2	['TP53', 'TP63']
Glyco_transf_8:149:p	41	5	21	5	10.1883	19456	1.72222e-25	3.01194e-24	256	20	20	3	['GXYLT1', 'GLT8D2', 'Q8IXV1']
DAGK_acc:34:l	29	2	15	2	9.48705	19456	4.1494e-25	7.14926e-24	160	23	23	2	['DGKI', 'DGKG']
SRRM_C:11:e	29	2	29	2	13.0106	19456	4.1494e-25	7.14926e-24	67	2	2	1	['KIAA1853']
P53:123:v	103	34	27	34	10.7947	19456	4.30982e-25	7.39827e-24	196	33	33	1	['TP53']
Trypsin:82:p	101	33	47	32	8.00349	19456	5.87275e-25	1.00073e-23	221	210	224	12	['PRSS3', 'TMPRSS11F', 'HPN', 'HGF', 'TMPRSS9', 'KLK15', 'CELA2B', 'PRSS36', 'KLK10', 'PROZ', 'KLK2', 'CELA1']
Collagen:10:G	101	33	85	33	6.04763	19456	5.87275e-25	1.00073e-23	60	175	869	33	['COL7A1', 'COL3A1', 'COL4A6', 'COL23A1', 'COL9A2', 'COL9A1', 'COL13A1', 'COL1A1', 'COL9A3', 'COL4A3', 'COL27A1', 'C1QTNF3', 'COL15A1', 'COLEC10', 'COL5A1', 'COL4A5', 'COL11A1', 'COL21A1', 'COL20A1', 'COL12A1', 'COL6A2', 'C1QA', 'SFTPD', 'COL5A2', 'GLDN', 'CCBE1', 'COL1A2', 'C1QTNF1', 'COL4A2', 'C1QTNF8', 'COL4A4', 'COL4A1', 'COL22A1']
Sulfotransfer_1:112:R	37	4	27	4	8.74737	19456	6.59461e-25	1.11964e-23	267	49	49	15	['SULT1B1', 'SULT2B1', 'DSEL', 'HS3ST2', 'SULT4A1', 'HS3ST1', 'CHST2', 'HS3ST3A1', 'SULT1A1', 'SULT6B1', 'SULT1C2', 'SULT1A2', 'CHST4', 'HS3ST4', 'CHST3']
Trypsin:46:n	104	35	44	34	8.04571	19456	1.05824e-24	1.78367e-23	221	210	224	12	['KLK14', 'PRSS3', 'KLK2', 'GZMK', 'PRSS37', 'TMPRSS9', 'CTSG', 'PRSS1', 'AZU1', 'CELA2B', 'TMPRSS7', 'KLK11']
Tetraspannin:84:v	23	1	22	1	7.86884	19456	1.24247e-24	2.07912e-23	208	54	56	7	['CD82', 'CD37', 'TSPAN8', 'TSPAN32', 'TSPAN11', 'TSPAN4', 'TSPAN7']
Pro-rich:93:P	23	1	19	1	9.35426	19456	1.24247e-24	2.07912e-23	168	7	20	1	['PRB2']
Cadherin_C_2:9:a	56	11	42	11	8.75053	19456	3.42804e-24	5.71585e-23	85	86	74	15	['PCDHGA7', 'PCDHGA6', 'PCDHAC1', 'PCDHB2', 'PCDHB4', 'PCDHA5', 'PCDHGA1', 'PCDHB11', 'PCDHB8', 'PCDHGA3', 'PCDHG', 'PCDHGB3', 'PCDHB12', 'PCDHA7', 'PCDH10']
P53:16:k	116	43	29	43	10.9662	19456	5.34179e-24	8.81206e-23	196	33	33	2	['TP53', 'TP63']
Collagen:55:G	79	22	64	21	5.6932	19456	6.38206e-24	1.0454e-22	60	175	869	32	['COL6A2', 'COL23A1', 'COL22A1', 'COL3A1', 'COL21A1', 'COL17A1', 'COL11A1', 'COL16A1', 'COL4A6', 'COL2A1', 'COL4A2', 'MSR1', 'COL4A4', 'COL24A1', 'COL4A1', 'COL27A1', 'COL4A5', 'COL5A1', 'COL25A1', 'MARCO', 'COL7A1', 'C1QC', 'ADIPOQ', 'COL20A1', 'GLDN', 'FCN1', 'COL18A1', 'COL14A1', 'OTOL1', 'COL4A3', 'COL1A1', 'COL1A2']
Bax1-I:146:p	28	2	28	2	10.96	19456	6.75163e-24	1.09058e-22	207	8	8	2	['GRINA', 'TMBIM4']
BAF250_C:14:R	28	2	27	2	11.1526	19456	6.75163e-24	1.09058e-22	255	7	7	2	['ARID1A', 'ARID1B']
La:4:Q	28	2	28	2	9.79006	19456	6.75163e-24	1.09058e-22	59	18	18	1	['LARP4B']
CTNNB1_binding:138:h	28	2	10	2	8.63806	19456	6.75163e-24	1.09058e-22	202	40	40	2	['TCF7', 'TCF7L2']
SNF2_N:188:t	36	4	26	4	7.94751	19456	6.8516e-24	1.09909e-22	350	80	83	10	['RAD54L2', 'EP400', 'CHD4', 'SMARCA2', 'CHD2', 'CHD6', 'SMARCA4', 'CHD3', 'CHD1', 'CHD5']
FAM47:225:e	36	4	19	4	9.6787	19456	6.8516e-24	1.09909e-22	257	7	25	2	['FAM47A', 'FAM47C']
TSP_1:32:e	102	35	55	35	7.0635	19456	1.17517e-23	1.87223e-22	49	105	434	15	['ADAMTSL3', 'ADAMTS5', 'ADAMTS13', 'ADAMTSL4', 'HMCN1', 'ADAMTSL2', 'THSD1', 'THSD7A', 'PAPLN', 'ADAMTS2', 'ADAMTS18', 'C8B', 'BAI3', 'THBS2', 'THSD7B']
Cadherin_tail:111:s	32	3	2	3	8.76031	19456	1.43607e-23	2.28006e-22	133	42	42	15	['PCDHA4', 'PCDHA3', 'PCDHA5', 'PCDHA11', 'PCDHAC1', 'PCDHA1', 'PCDHA13', 'PCDHA8', 'PCDHA10', 'PCDHA2', 'PCDHA7', 'PCDHA6', 'PCDHA12', 'PCDHAC2', 'PCDHA9']
Trypsin:179:G	72	19	44	19	7.5152	19456	3.09965e-23	4.88799e-22	221	210	224	24	['GZMA', 'F11', 'PRSS8', 'CORIN', 'PRSS1', 'PLAU', 'F12', 'HPR', 'HGF', 'MASP2', 'PRSS3', 'KLK5', 'CFI', 'CTSG', 'PRSS42', 'PRSS21', 'CMA1', 'TMPRSS7', 'KLK1', 'OVCH1', 'TPSD1', 'PRSS58', 'PRSS12', 'KLK14']
Biotin_lipoyl:23:v	22	1	22	1	9.29013	19456	3.20433e-23	5.01904e-22	73	19	20	2	['DLAT', 'MCCC1']
CD36:59:v	22	1	4	1	9.80471	19456	3.20433e-23	5.01904e-22	467	11	14	2	['SCARB1', 'CD36']
Cadherin:7:E	298	178	199	158	6.95923	19456	5.09543e-23	7.92773e-22	93	227	1363	67	['PCDHB1', 'CDH8', 'DCHS1', 'FAT3', 'PCDHB7', 'DSG3', 'PCDH11Y', 'PCDHGB2', 'PCDHA2', 'FAT2', 'PCDHA8', 'PCDHB12', 'FAT', 'PCDH10', 'PCDHGA11', 'PCDHGA1', 'FAT4', 'DSC2', 'CDH1', 'PCDHA13', 'PCDHA4', 'PCDHA3', 'PCDH9', 'CDH18', 'DSG4', 'CDH7', 'CDHR2', 'PCDH7', 'PCDHA5', 'PCDHA6', 'PCDH17', 'DSC1', 'CDH9', 'PCDHA9', 'CDH24', 'PCDHB10', 'PCDHGB3', 'CDH10', 'PCDHGA6', 'PCDHGB7', 'PCDHB4', 'PCDHA10'…
Plectin:26:A	52	10	12	10	6.87579	19456	5.56945e-23	8.63636e-22	41	20	252	2	['PLEC', 'DSP']
Furin-like:71:r	27	2	15	2	9.65959	19456	1.06081e-22	1.62332e-21	149	20	19	4	['ERBB4', 'EGFR', 'IGF1R', 'INSRR']
Pkinase:196:p	141	61	78	60	5.95567	19456	1.13005e-22	1.7236e-21	264	1221	1293	64	['NEK5', 'TSSK1B', 'MAP2K4', 'MAP2K3', 'TAOK1', 'CIT', 'TRIO', 'CSNK1E', 'RIPK4', 'SgK269', 'CAMK2G', 'STK16', 'CDK20', 'STK4', 'BRSK2', 'SBK2', 'MAP3K3', 'GAK', 'TAOK2', 'SIK1', 'BMP2K', 'CDK13', 'VRK2', 'PRKCB', 'PAK1', 'LRRK2', 'PRKACA', 'CLK1', 'RPS6KA1', 'MASTL', 'TRIB3', 'WNK3', 'STK36', 'SGK2', 'RPS6KA4', 'CAMK2A', 'MYLK2', 'TBK1', 'MAP2K7', 'NEK9', 'NEK2', 'PAK7', 'RPS6KA6', 'PRKD1', 'TNI…
Laminin_G_2:2:r	75	21	52	21	7.34803	19456	1.15921e-22	1.7623e-21	126	111	262	17	['CNTNAP2', 'EGFLAM', 'CNTNAP4', 'USH2A', 'NRXN1', 'FAT3', 'CELSR3', 'NRXN2', 'PROS1', 'CRB2', 'FAT4', 'CRB1', 'CELSR2', 'LAMA3', 'CSPG4', 'CNTNAP5', 'CNTNAP3']
Annexin:27:R	41	6	38	6	7.88082	19456	1.27421e-22	1.92456e-21	66	24	99	8	['ANXA6', 'ANXA9', 'ANXA7', 'ANXA4', 'ANXA1', 'ANXA10', 'ANXA2', 'ANXA5']
DED:66:r	41	6	14	6	8.5329	19456	1.27421e-22	1.92456e-21	82	37	63	1	['CASP8']
P53:83:p	49	9	16	9	9.72295	19456	1.43927e-22	2.16682e-21	196	33	33	2	['TP53', 'TP73']
UQ_con:31:k	31	3	30	3	7.8589	19456	1.7201e-22	2.58126e-21	140	75	76	7	['UBE2U', 'UBE2G2', 'BIRC6', 'UBE2E2', 'UBE2T', 'UBE2F', 'UBE2D1']
Pkinase_Tyr:133:r	84	26	69	26	5.24117	19456	1.82201e-22	2.7254e-21	260	1213	1264	38	['JAK2', 'ERBB4', 'DDR1', 'ILK', 'INSRR', 'LMTK2', 'EPHB2', 'EPHB3', 'EPHA2', 'EPHA6', 'GUCY2C', 'LTK', 'NTRK1', 'ROR1', 'MATK', 'FGFR3', 'DDR2', 'TYK2', 'DSTYK', 'FLT4', 'FLT3', 'ZAP70', 'ROR2', 'EPHA4', 'PTK2', 'PDGFRA', 'NTRK3', 'KDR', 'EPHA3', 'TNK1', 'BMX', 'EPHA7', 'BTK', 'GUCY2D', 'MET', 'ALK', 'LIMK2', 'TYRO3']
7tm_2:36:r	56	12	36	12	7.86195	19456	1.87049e-22	2.78895e-21	245	136	137	16	['GIPR', 'GPR116', 'GPR110', 'GPR126', 'LPHN2', 'GPR111', 'ADCYAP1R1', 'GLP2R', 'GPR97', 'CRHR1', 'SCTR', 'CD97', 'GPR133', 'BAI2', 'GCGR', 'GPR124']
7tm_4:37:a	176	86	143	85	7.78551	19456	3.37967e-22	5.00708e-21	280	469	454	103	['OR1M1', 'OR2T1', 'OR5B12', 'OR14J1', 'OR4D9', 'OR5D18', 'OR4E2', 'OR5M1', 'OR1N2', 'OR4A47', 'OR6K3', 'OR56A3', 'OR4K2', 'OR10AG1', 'OR13C3', 'OR2Y1', 'OR5T1', 'OR5L2', 'OR51E1', 'OR2D3', 'OR51E2', 'OR6C74', 'OR5M10', 'OR2M5', 'OR10R2', 'OR6C4', 'OR51B5', 'OR6C70', 'OR2T4', 'OR10T2', 'OR51A4', 'OR6C65', 'OR6Y1', 'OR5B21', 'OR2T12', 'OR51Q1', 'OR13G1', 'OR4K5', 'OR6K6', 'OR6V1', 'OR6B2', 'OR6F1'…
Cadherin:29:s	312	192	236	174	7.02546	19456	4.2626e-22	6.27519e-21	93	227	1363	79	['PCDHB5', 'PCDHA9', 'PCDHA5', 'PCDH17', 'PCDHB4', 'PCDHB10', 'CDH19', 'PCDH9', 'PCDHB1', 'PCDHA8', 'DCHS1', 'CDHR2', 'PCDHA6', 'PCDHGA3', 'PCDHA4', 'PCDHB7', 'FAT3', 'PCDH11X', 'PCDHGB3', 'FAT4', 'PCDHGB7', 'PCDHB11', 'PCDHGA6', 'PCDHA2', 'FAT', 'CDH20', 'PCDHA1', 'PCDHB2', 'PCDHA3', 'PCDHB13', 'PCDHA13', 'FAT2', 'CDH9', 'CDH5', 'PCDHGB2', 'PCDH1', 'PCDHGA7', 'PCDH18', 'PCDHAC1', 'PCDHA7', 'CDH7…
fn3:72:r	285	170	232	160	5.74855	19456	4.35666e-22	6.39343e-21	85	419	3017	60	['TTN', 'COL14A1', 'PTPRU', 'TNR', 'TNN', 'TIE1', 'MYBPH', 'LRRN3', 'CNTN1', 'COL20A1', 'PTPRF', 'PTPRB', 'USH2A', 'FNDC3A', 'TNC', 'CNTFR', 'PTPRH', 'TNXB', 'DCC', 'MYBPC1', 'OBSCN', 'NRCAM', 'MYOM1', 'SDK1', 'PTPRG', 'ITGB4', 'IL6ST', 'FNDC3B', 'DSCAM', 'FN1', 'CNTN5', 'KAL1', 'MYOM2', 'FSD1', 'PTPRM', 'LIFR', 'NEO1', 'AXL', 'MYBPHL', 'LRFN4', 'NFASC', 'BOC', 'CNTN6', 'COL12A1', 'SDK2', 'IGSF9'…
Collagen:16:G	83	26	70	26	5.76446	19456	6.63193e-22	9.70181e-21	60	175	869	32	['COL4A5', 'COL3A1', 'COL24A1', 'COL16A1', 'COL9A1', 'COL23A1', 'COL4A4', 'COL21A1', 'FCN1', 'COL4A6', 'COL5A1', 'COL13A1', 'COL4A2', 'COLEC11', 'COL22A1', 'OTOL1', 'C1QTNF2', 'COL4A3', 'COL2A1', 'COL7A1', 'C1QC', 'C1QA', 'COL6A3', 'COL15A1', 'COL12A1', 'C1QTNF6', 'COL27A1', 'MBL2', 'COLEC10', 'COLEC12', 'COL4A1', 'COL1A1']
Cation_ATPase:66:k	34	4	22	4	7.61074	19456	6.80949e-22	9.86846e-21	91	101	99	10	['ATP12A', 'ATP10A', 'ATP2B3', 'ATP11B', 'ATP2A1', 'ATP8B3', 'ATP9A', 'ATP8B4', 'ATP2A2', 'ATP8A1']
PTEN_C2:105:t	34	4	29	4	9.3332	19456	6.80949e-22	9.86846e-21	135	30	30	1	['PTEN']
Cadherin_tail:27:s	34	4	2	4	8.84777	19456	6.80949e-22	9.86846e-21	133	42	42	15	['PCDHA12', 'PCDHAC1', 'PCDHA6', 'PCDHA4', 'PCDHA1', 'PCDHA3', 'PCDHA5', 'PCDHA13', 'PCDHA10', 'PCDHA8', 'PCDHAC2', 'PCDHA11', 'PCDHA9', 'PCDHA2', 'PCDHA7']
PKD_channel:125:p	21	1	11	1	5.84451	19456	7.90551e-22	1.12811e-20	426	173	208	2	['PKD2L1', 'PKD2L2']
PI3_PI4_kinase:13:r	21	1	14	1	8.37502	19456	7.90551e-22	1.12811e-20	250	31	36	6	['MTOR', 'PIK3CA', 'PIK3C2G', 'PIK3C2A', 'PIK3CG', 'PIK3C3']
DUF1053:17:n	21	1	21	1	10.223	19456	7.90551e-22	1.12811e-20	103	10	10	1	['ADCY8']
PI3K_P85_iSH2:135:L	21	1	7	1	10.375	19456	7.90551e-22	1.12811e-20	161	9	9	1	['PIK3R1']
EGF:10:G	113	44	82	44	6.85646	19456	8.16467e-22	1.16153e-20	32	245	555	29	['SLIT2', 'CRB2', 'NOTCH1', 'JAG1', 'PTGS1', 'HABP2', 'DNER', 'DLK1', 'LRP1B', 'NRXN1', 'JAG2', 'SELE', 'PTGS2', 'SNED1', 'EYS', 'CRB1', 'NOTCH2', 'MMRN1', 'NOTCH2NL', 'PROS1', 'F9', 'MEP1A', 'EGFLAM', 'NOTCH4', 'NOTCH3', 'CELSR1', 'PLAT', 'SLIT1', 'SLIT3']
Sulfotransfer_1:117:v	48	9	45	9	9.12288	19456	8.81449e-22	1.25015e-20	267	49	49	12	['HS3ST1', 'WSCD1', 'HS3ST4', 'CHST1', 'HS3ST2', 'CHST2', 'NDST1', 'NDST4', 'CHST3', 'CHST5', 'CHST6', 'CHST7']
EGF_CA:32:g	148	67	111	63	6.59555	19456	9.37576e-22	1.32571e-20	42	189	871	37	['NOTCH1', 'FBN1', 'FAT4', 'MATN3', 'LRP1B', 'COMP', 'NELL2', 'CRELD2', 'LTBP4', 'FBLN5', 'SCUBE3', 'FBN3', 'EGF', 'LTBP1', 'NPNT', 'NOTCH2', 'FBN2', 'EMR1', 'HMCN1', 'CCBE1', 'JAG1', 'NELL1', 'EGFL6', 'CD97', 'FBLN2', 'CD93', 'MATN2', 'NID1', 'MEGF8', 'THBS2', 'SCUBE1', 'LTBP2', 'THBS4', 'LTBP3', 'TPO', 'NOTCH2NL', 'TLL1']
Pep_M12B_propep:56:n	55	12	32	12	8.33408	19456	9.82326e-22	1.38478e-20	140	97	97	6	['ADAM7', 'ADAM28', 'ADAMTS3', 'ADAMTS12', 'ADAMTS18', 'ADAM19']
hEGF:4:G	88	29	66	29	6.25671	19456	9.89748e-22	1.39103e-20	22	104	655	18	['NOTCH4', 'NOTCH1', 'NOTCH2', 'NOTCH3', 'MEGF10', 'FBN2', 'DNER', 'SLIT2', 'JAG2', 'CRB1', 'MEGF6', 'MEGF11', 'SNED1', 'DLL3', 'SLIT1', 'CRB2', 'EDIL3', 'FBN3']
hEGF:6:t	137	60	53	59	6.89531	19456	1.486e-21	2.08219e-20	22	104	655	7	['NOTCH1', 'MEGF10', 'NOTCH4', 'NOTCH2', 'DLL1', 'NOTCH3', 'JAG2']
CIMR:140:d	26	2	26	2	9.94618	19456	1.60742e-21	2.24556e-20	143	2	15	1	['IGF2R']
P53_tetramer:15:q	71	20	33	20	10.5475	19456	2.10264e-21	2.91984e-20	42	27	27	2	['TP63', 'TP53']
Collagen:1:G	61	15	57	14	5.32015	19456	2.14155e-21	2.96502e-20	60	175	869	27	['COL3A1', 'COL4A2', 'COLEC11', 'COL4A4', 'COL24A1', 'COL15A1', 'COL28A1', 'COL6A3', 'COL22A1', 'COL5A2', 'COL13A1', 'COLEC12', 'COL11A1', 'COL4A1', 'COL27A1', 'COL23A1', 'OTOL1', 'COL2A1', 'MSR1', 'COL4A3', 'COL5A1', 'COL1A2', 'MARCO', 'COL4A6', 'COLEC10', 'COL17A1', 'COL18A1']
hEGF:21:G	80	25	47	25	6.11921	19456	3.10205e-21	4.25686e-20	22	104	655	17	['NOTCH1', 'FAT4', 'JAG2', 'SNED1', 'CRB1', 'SLIT2', 'FBN3', 'JAG1', 'CRB2', 'NOTCH2', 'MEGF6', 'FBN2', 'NOTCH3', 'MEGF10', 'DLL1', 'WIF1', 'DNER']
Plexin_cytopl:341:t	33	4	17	4	10.3897	19456	6.50367e-21	8.87245e-20	555	13	14	1	['PLXNB3']
Trypsin:153:k	86	29	42	28	7.77154	19456	1.14432e-20	1.55201e-19	221	210	224	11	['CFB', 'PRSS3', 'TMPRSS15', 'KLK12', 'GZMB', 'PRSS45', 'HGF', 'AZU1', 'CELA3B', 'PRSS58', 'HPN']
Recep_L_domain:56:r	44	8	24	8	9.40261	19456	1.34654e-20	1.81568e-19	112	20	37	5	['ERBB3', 'EGFR', 'IGF1R', 'ERBB4', 'INSRR']
Neur_chan_LBD:17:r	44	8	43	8	8.10427	19456	1.34654e-20	1.81568e-19	216	88	91	18	['CHRNA2', 'GABRG2', 'CHRNB4', 'GABRA4', 'CHRNA1', 'GABRD', 'GABRE', 'HTR3A', 'GABRG1', 'GABRA5', 'CHRNB2', 'GABRA6', 'CHRNA10', 'CHRNA9', 'CHRNA5', 'HTR3C', 'GABRB1', 'GABRA3']
SRCR:49:s	51	11	33	10	6.74824	19456	1.75971e-20	2.36594e-19	100	56	270	7	['DMBT1', 'SCARA5', 'MARCO', 'LOXL3', 'CD163L1', 'SRCRB4D', 'CD163']
Myosin_tail_1:539:a	29	3	29	3	8.72521	19456	2.24222e-20	2.99735e-19	1081	35	39	6	['MYH7', 'MYH6', 'MYH1', 'MYH4', 'MYH13', 'MYH2']
FAM47:230:k	29	3	18	3	9.36675	19456	2.24222e-20	2.99735e-19	257	7	25	3	['FAM47C', 'FAM47A', 'FAM47B']
APOBEC_N:140:d	25	2	25	2	9.27292	19456	2.34582e-20	3.12686e-19	175	18	23	2	['APOBEC3F', 'APOBEC3H']
MIP:168:a	41	7	26	7	9.98662	19456	2.97169e-20	3.93855e-19	227	23	23	2	['AQP9', 'AQP7']
UDPGT:318:s	41	7	6	7	8.95559	19456	2.97169e-20	3.93855e-19	499	41	47	10	['UGT1A1', 'UGT1A5', 'UGT1A7', 'UGT1A3', 'UGT1A4', 'UGT2A1', 'UGT1A8', 'UGT1A6', 'UGT1A9', 'UGT1A10']
SH2:27:R	83	28	59	28	7.62078	19456	5.38681e-20	7.09899e-19	77	215	240	32	['PIK3R3', 'BCAR3', 'SHE', 'SOCS4', 'SH2B1', 'TNS1', 'ZAP70', 'SHC3', 'VAV1', 'SOCS3', 'SH2D3C', 'TNS3', 'PTPN6', 'GRB10', 'SLA2', 'SYK', 'FYN', 'ABL1', 'SH2B3', 'SHC4', 'CSK', 'SH2D3A', 'SHF', 'BLNK', 'SHB', 'PIK3R1', 'SHC1', 'FGR', 'STAT3', 'PIK3R2', 'CHN2', 'NCK1']
Filamin:101:P	48	10	29	9	6.48966	19456	5.80015e-20	7.62211e-19	103	28	304	4	['FLNB', 'FLNC', 'KDELC2', 'FLNA']
P53:146:n	112	46	34	46	10.9156	19456	5.92217e-20	7.71892e-19	196	33	33	2	['TP53', 'TP63']
I-set:69:G	276	169	173	161	5.36937	19456	5.92359e-20	7.71892e-19	90	839	3800	49	['IGSF22', 'CNTN6', 'MDGA2', 'TTN', 'CADM3', 'KIRREL3', 'PXDNL', 'FGFR2', 'MYOM3', 'DCC', 'DSCAM', 'OBSCN', 'MYBPC2', 'ROBO2', 'CNTN4', 'CNTN1', 'FLT1', 'CNTN3', 'FGFRL1', 'LSAMP', 'CNTN5', 'UNC5C', 'IGDCC3', 'SIGLEC11', 'IGSF5', 'PTPRD', 'IGSF10', 'FLT4', 'PDGFRB', 'ALPK3', 'NCAM2', 'HMCN1', 'NEO1', 'KDR', 'LRRN1', 'MYBPC1', 'OPCML', 'ROBO1', 'NEGR1', 'SIGLEC6', 'MYPN', 'TMIGD1', 'PXDN', 'VCAM1'…
P53:47:c	143	67	40	66	11.2681	19456	5.96325e-20	7.74889e-19	196	33	33	1	['TP53']
Kinesin:3:R	32	4	21	4	7.42471	19456	6.02984e-20	7.8136e-19	333	104	106	7	['KIF15', 'KIF23', 'KIF1A', 'KIF2C', 'KIF2B', 'KIF4B', 'KIF2A']
Sugar_tr:109:R	43	8	35	8	7.78448	19456	8.33204e-20	1.07074e-18	452	106	111	17	['SLC22A11', 'SLC2A5', 'SLC22A6', 'SLC22A17', 'SLC22A14', 'SLC2A9', 'SLC22A10', 'SLC2A11', 'SLC2A12', 'SLC2A8', 'SLC2A14', 'SLC2A7', 'SV2B', 'SVOPL', 'SLC2A10', 'SLC22A15', 'SLC22A2']
BTB:28:a	68	20	38	20	7.33923	19456	1.28845e-19	1.64667e-18	111	223	239	9	['KBTBD3', 'ZBTB20', 'RHOBTB1', 'ZBTB5', 'BTBD19', 'KLHL6', 'KBTBD4', 'KBTBD7', 'BACH2']
zf-C2H2_4:17:l	108	44	94	44	5.9753	19456	1.52085e-19	1.92255e-18	24	1179	977	34	['ZNF490', 'ZNF878', 'ZNF791', 'SNAI2', 'MAZ', 'ZNF441', 'ZNF555', 'ZNF700', 'PRDM8', 'ZNF668', 'ZNF556', 'ZNF442', 'ZNF699', 'ZNF563', 'ZNF775', 'ZNF57', 'PLAG1', 'ZNF710', 'HINFP', 'ZNF77', 'ZNF433', 'ZNF136', 'ZNF439', 'ZNF564', 'ZNF844', 'ZNF440', 'ZNF497', 'ZNF354A', 'ZNF124', 'ZNF408', 'SP4', 'PRDM4', 'ZSCAN10', 'ZNF669']
Cadherin:45:r	356	238	248	219	7.21579	19456	1.99171e-19	2.51095e-18	93	227	1363	73	['FAT2', 'PCDHGA3', 'PCDH19', 'CDHR3', 'PCDHGA7', 'PCDHA4', 'PCDHGA6', 'CDH1', 'CDH9', 'PCDHA13', 'CDH17', 'CDH8', 'PCDH9', 'FAT4', 'CDH2', 'PCDHGA12', 'PCDHB5', 'PCDHGA9', 'PCDH7', 'PCDHA8', 'DSG4', 'CDH24', 'PCDHB13', 'PCDHA10', 'PCDH11X', 'PCDHB14', 'FAT3', 'FAT', 'PCDHB12', 'PCDHA1', 'PCDHGA8', 'PCDHB1', 'CDHR2', 'PCDH10', 'PCDHGB1', 'PCDHGA1', 'CDHR1', 'CDH5', 'PCDH12', 'CDH11', 'PCDHB7', 'P…
zf-RING_2:17:l	47	10	35	10	6.83685	19456	3.13365e-19	3.93993e-18	44	249	234	17	['RNF43', 'RNF149', 'RNF139', 'RNF148', 'RNF38', 'RNF150', 'TTC3', 'RNF167', 'ZNRF2', 'RNF103', 'RNF128', 'RNF10', 'RNF133', 'ZNRF3', 'AMFR', 'RNF11', 'RLIM']
WD40:30:d	267	164	145	157	6.60877	19456	3.63321e-19	4.54347e-18	38	506	1557	66	['WDR33', 'WDR88', 'SPAG16', 'PLAA', 'WDR77', 'TBL3', 'TBL1XR1', 'CORO1A', 'WDFY2', 'STRN4', 'FBXW11', 'FBXW7', 'EML4', 'TRAF7', 'STRAP', 'PHIP', 'NBEA', 'MLST8', 'RBBP7', 'HIRA', 'EML5', 'EML2', 'WSB1', 'ELP2', 'WDR70', 'GNB3', 'WDR72', 'GNB5', 'LOC340578', 'POC1B', 'WDR47', 'BRWD1', 'TAF5L', 'FBXW9', 'WDR5B', 'WDFY1', 'GNB2L1', 'WDR31', 'CORO1C', 'BRWD3', 'WDR3', 'POC1A', 'BTRC', 'GNB4', 'TBL1X…
Myosin_head:22:R	34	5	26	5	7.43274	19456	5.65838e-19	6.98216e-18	677	99	112	15	['MYH4', 'MYO1F', 'MYO7B', 'MYO18A', 'MYO1A', 'MYO1H', 'MYH8', 'MYH6', 'MYO9A', 'MYO1B', 'MYH2', 'MYO5C', 'MYO16', 'MYO5B', 'MYH7']
PDEase_I:185:e	34	5	18	5	7.76436	19456	5.65838e-19	6.98216e-18	238	89	89	6	['PDE1B', 'PDE1C', 'PDE11A', 'PDE7A', 'PDE2A', 'PDE8B']
TSP_1:16:G	82	29	71	28	6.74863	19456	1.33137e-18	1.6256e-17	49	105	434	26	['ADAMTS2', 'UNC5D', 'BAI3', 'ADAMTS12', 'ADAMTS20', 'C7', 'THSD4', 'ISM1', 'ADAMTS17', 'ADAMTS1', 'HMCN1', 'ADAMTSL3', 'C6', 'CFP', 'THSD7A', 'C9', 'THSD7B', 'SEMA5B', 'CILP', 'ADAMTS13', 'THBS1', 'ADAMTSL2', 'SEMA5A', 'ADAMTSL1', 'ADAMTS19', 'BAI2']
P53:181:v	107	45	31	45	10.8497	19456	1.93722e-18	2.35299e-17	196	33	33	2	['TP53', 'TP73']
Cadherin:61:r	412	291	292	263	7.42656	19456	2.21363e-18	2.68172e-17	93	227	1363	76	['FAT3', 'PCDHB15', 'PCDHGA12', 'PCDHA2', 'PCDHA8', 'PCDHGB6', 'FAT', 'CDH11', 'PCDHA1', 'PCDHGA5', 'PCDH1', 'PCDHA7', 'DCHS1', 'PCDHA9', 'PCDHB5', 'PCDHA10', 'PCDHB1', 'PCDHB4', 'CELSR3', 'CDHR3', 'PCDHGC5', 'PCDHAC1', 'PCDHA6', 'PCDHA11', 'CDH12', 'PCDHGB7', 'CDHR2', 'CELSR2', 'PCDHA13', 'FAT2', 'DSG4', 'PCDHB2', 'CDH1', 'FAT4', 'CDH15', 'PCDHB7', 'CDH9', 'DSC3', 'CDH22', 'CELSR1', 'PCDHA3', 'P…
SCAN:5:r	48	11	37	10	8.09374	19456	2.35696e-18	2.84794e-17	90	100	100	20	['ZSCAN1', 'ZNF449', 'ZNF215', 'ZNF498', 'ZNF397', 'ZSCAN23', 'ZNF394', 'ZKSCAN1', 'ZNF323', 'ZSCAN4', 'ZNF396', 'ZKSCAN3', 'ZNF192', 'ZSCAN29', 'ZSCAN12', 'ZNF24', 'MZF1', 'SCAND3', 'ZSCAN18', 'ZSCAN30']
Kinesin:329:r	27	3	21	3	7.1796	19456	2.55374e-18	3.06185e-17	333	104	106	15	['KIF21B', 'KIF5A', 'KIF3A', 'KIF13B', 'KIF1B', 'KIF7', 'KIF17', 'KIF1A', 'KIF19', 'KIF18A', 'KIF3C', 'KIF3B', 'KIF4A', 'KIF25', 'KIF26B']
CAMSAP_CKK:88:m	27	3	14	3	10.9075	19456	2.55374e-18	3.06185e-17	119	8	8	4	['KIAA1543', 'CAMSAP3', 'CAMSAP2', 'CAMSAP1L1']
EamA:72:l	27	3	27	3	9.15263	19456	2.55374e-18	3.06185e-17	137	38	27	1	['SLC35F5']
EGF:11:t	151	76	64	73	7.27469	19456	2.79065e-18	3.3373e-17	32	245	555	14	['NOTCH1', 'CUBN', 'NOTCH3', 'EGFLAM', 'NRG4', 'NOTCH2', 'EGF', 'PROZ', 'JAG2', 'CRB1', 'LTBP2', 'DLL4', 'MMRN1', 'NOTCH2NL']
RasGEF_N:80:v	33	5	13	5	8.38967	19456	4.32727e-18	5.16165e-17	105	56	56	2	['RALGDS', 'KNDC1']
Filaggrin:44:g	23	2	23	2	9.15263	19456	4.43674e-18	5.23851e-17	56	1	23	1	['FLG']
zf-DHHC:73:l	23	2	13	2	8.28387	19456	4.43674e-18	5.23851e-17	134	42	42	3	['ZDHHC13', 'ZDHHC14', 'ZDHHC3']
Peptidase_C14:186:d	23	2	12	2	8.00377	19456	4.43674e-18	5.23851e-17	248	50	51	6	['CASP5', 'CASP8', 'CASP14', 'CASP10', 'CASP12', 'MALT1']
BAR:128:r	23	2	14	2	8.03234	19456	4.43674e-18	5.23851e-17	239	49	50	6	['SH3GLB2', 'ARHGAP44', 'BIN2', 'SH3GL3', 'SNX30', 'DNMBP']
PI-PLC-X:54:e	30	4	11	4	8.85007	19456	4.72423e-18	5.56382e-17	145	37	37	5	['PLCB1', 'PLCH1', 'PLCG1', 'PLCZ1', 'PLCB2']
Pkinase_Tyr:51:e	67	21	58	21	4.91494	19456	5.41173e-18	6.35742e-17	260	1213	1264	25	['FGR', 'JAK2', 'INSRR', 'ERBB2', 'PTK7', 'TGFBR2', 'ANKK1', 'NPR2', 'KSR2', 'PDGFRB', 'ABL2', 'NPR1', 'STYK1', 'EPHA2', 'EPHB2', 'ZAP70', 'LYN', 'GUCY2C', 'BRAF', 'BTK', 'EPHA6', 'ROR2', 'PTK2B', 'MLKL', 'JAK3']
TSP_1:22:R	115	51	101	51	7.23657	19456	5.45756e-18	6.39511e-17	49	105	434	32	['THSD7A', 'THBS2', 'ADAMTS3', 'BAI3', 'C8orf84', 'SEMA5A', 'HMCN1', 'PAPLN', 'SEMA5B', 'THSD7B', 'CILP', 'UNC5B', 'ADAMTS16', 'ADAMTSL3', 'ADAMTS14', 'THBS1', 'C7', 'C6', 'ADAMTS20', 'ADAMTSL2', 'ADAMTS12', 'ADAMTS2', 'ADAMTS7', 'ADAMTS6', 'CFP', 'UNC5D', 'ADAMTS19', 'BAI2', 'ADAMTS4', 'THSD4', 'ADAMTS18', 'ADAMTS13']
V-set:61:r	95	38	71	38	6.58806	19456	6.98262e-18	8.14114e-17	109	958	562	47	['VSIG1', 'BTNL2', 'BTN3A1', 'SCN3B', 'CEACAM7', 'BTN2A2', 'GPA33', 'PVRL3', 'CEACAM3', 'MPZL2', 'TREM2', 'NCAN', 'HAPLN3', 'SIGLEC14', 'VSTM2L', 'MOG', 'VTCN1', 'CD276', 'SLAMF6', 'CADM2', 'SIGLEC10', 'PIGR', 'IGSF3', 'TMIGD2', 'Q5JXA8', 'CD300LD', 'C10orf54', 'HEPACAM', 'CD300A', 'HAVCR1', 'MPZL3', 'AMICA1', 'BCAN', 'BCAM', 'TIGIT', 'VSIG4', 'SIGLEC12', 'SIGLEC6', 'PVRL4', 'HHLA2', 'CEACAM21', …
Pkinase:56:k	126	59	94	56	5.7934	19456	1.18497e-17	1.37468e-16	264	1221	1293	54	['MAP3K6', 'CSNK1A1L', 'SCYL3', 'DAPK2', 'STRADB', 'ACVR2B', 'ENSG00000168038', 'MYLK4', 'MAST4', 'RNASEL', 'STK3', 'STK39', 'HIPK4', 'AURKB', 'ACVR1', 'PRKCE', 'PIM3', 'MAPK6', 'MAP4K1', 'VRK1', 'DYRK2', 'MAP2K2', 'RPS6KA1', 'BRSK1', 'CDC42BPG', 'IRAK1', 'MYO3B', 'CAMK4', 'MAST1', 'NEK10', 'TGFBR1', 'PRKAA1', 'STK32A', 'MAP3K15', 'PIM1', 'CSNK2A2', 'ROCK2', 'ACVR1B', 'TSSK4', 'PRKACG', 'PSKH2', …
P53:169:g	75	26	22	26	10.3371	19456	1.31514e-17	1.52189e-16	196	33	33	1	['TP53']
7tm_4:11:G	272	174	212	162	8.41354	19456	2.3714e-17	2.73741e-16	280	469	454	136	['OR10AG1', 'OR5B3', 'OR51I2', 'OR7C2', 'OR2T12', 'OR4K15', 'OR2T5', 'OR10H2', 'OR11H6', 'OR2A14', 'OR13C9', 'OR52K2', 'OR5V1', 'OR4K13', 'OR5H15', 'OR8D4', 'OR2AG1', 'OR4C6', 'OR6V1', 'OR10G7', 'OR1I1', 'OR7D4', 'OR1J1', 'OR5M9', 'OR10G3', 'OR4N2', 'OR5AN1', 'OR51V1', 'OR14A16', 'OR13D1', 'OR4N4', 'OR5A2', 'OR2T6', 'OR5D18', 'OR11G2', 'OR10A3', 'OR51H1P', 'OR52N1', 'OR5AU1', 'OR10A5', 'OR4S2', '…
zf-CXXC:46:R	26	3	8	3	8.09818	19456	2.58317e-17	2.97448e-16	48	37	54	3	['TET1', 'MBD1', 'DNMT1']
hEGF:5:G	109	48	74	48	6.56546	19456	3.08888e-17	3.53928e-16	22	104	655	16	['FBN3', 'CRB2', 'NOTCH1', 'JAG1', 'FBN2', 'DNER', 'JAG2', 'SNED1', 'NOTCH2', 'CRB1', 'SLIT2', 'NOTCH4', 'MEGF10', 'NOTCH3', 'EDIL3', 'SLIT1']
Cadherin_tail:92:G	32	5	2	5	8.76031	19456	3.21268e-17	3.65413e-16	133	42	42	15	['PCDHA10', 'PCDHA7', 'PCDHAC2', 'PCDHA6', 'PCDHA5', 'PCDHA12', 'PCDHA3', 'PCDHA9', 'PCDHA8', 'PCDHA11', 'PCDHA13', 'PCDHAC1', 'PCDHA2', 'PCDHA1', 'PCDHA4']
RGS:52:e	32	5	18	5	7.34527	19456	3.21268e-17	3.65413e-16	118	107	112	6	['RGS5', 'RGS7', 'AXIN1', 'RGS4', 'GRK6', 'SNX13']
Recep_L_domain:6:e	32	5	13	5	8.94318	19456	3.21268e-17	3.65413e-16	112	20	37	2	['EGFR', 'ERBB3']
BTB:5:r	62	19	50	18	7.20596	19456	3.23796e-17	3.6739e-16	111	223	239	33	['BACH2', 'PATZ1', 'ZBTB37', 'ZBTB7B', 'ZBTB34', 'ZBTB33', 'KLHL25', 'KLHL4', 'ZBTB2', 'KLHL13', 'KLHL24', 'ZBTB45', 'KLHL26', 'KLHL3', 'ZBTB20', 'KLHL15', 'KLHL28', 'KLHL6', 'ZBTB17', 'KLHL14', 'RHOBTB3', 'KLHL34', 'NACC1', 'ZNF295', 'ZBTB49', 'LZTR1', 'KLHL36', 'GZF1', 'SPOPL', 'SPOP', 'KEAP1', 'ZBTB7A', 'ZNF278']
zf-C2H2:14:s	371	260	290	239	5.99311	19456	3.77649e-17	4.27451e-16	23	1207	3315	194	['ZNF678', 'ZNF43', 'ZNF74', 'ZNF260', 'ZNF302', 'ZNF571', 'ZNF775', 'ZNF774', 'ZNF345', 'ZNF22', 'ZNF572', 'ZNF549', 'ZNF182', 'ZNF681', 'ZNF483', 'SP1', 'ZNF135', 'ZNF646', 'ZNF528', 'ZNF134', 'ZNF814', 'ZNF665', 'ZNF543', 'ZNF329', 'ZNF575', 'ZNF691', 'WT1', 'ZNF737', 'ZNF777', 'ZNF319', 'ZSCAN5B', 'ZNF3', 'ZNF26', 'ZSCAN10', 'ZIC1', 'ZNF267', 'ZNF573', 'SNAI2', 'ZNF606', 'ZNF254', 'ZNF264', '…
GAGE:91:k	29	4	5	4	9.01061	19456	3.98431e-17	4.45553e-16	107	31	32	7	['GAGE12J', 'GAGE12F', 'GAGE12D', 'GAGE12G', 'GAGE1', 'GAGE2A', 'GAGE12H']
Bcl-2:35:a	29	4	16	4	9.61829	19456	3.98431e-17	4.45553e-16	100	21	21	4	['BCL2', 'MCL1', 'BCL2L13', 'BAX']
Pkinase_C:34:t	29	4	15	4	7.84069	19456	3.98431e-17	4.45553e-16	46	72	72	4	['PKN2', 'RPS6KA4', 'RPS6KA1', 'RPS6KB1']
PX:40:r	29	4	24	4	7.32411	19456	3.98431e-17	4.45553e-16	113	104	103	13	['NCF4', 'ARHGAP32', 'SNX18', 'SNX33', 'SNX15', 'SNX11', 'SNX8', 'SNX20', 'SNX31', 'PIK3C2G', 'KIF16B', 'SNX16', 'SNX24']
Cadherin_2:20:a	44	10	27	10	7.62338	19456	4.35193e-17	4.85496e-16	83	178	127	17	['PCDHA3', 'PCDHA4', 'PCDH18', 'PCDHGA1', 'PCDHA6', 'PCDHA13', 'PCDHB3', 'PCDHA10', 'PCDHA2', 'PCDHA12', 'PCDHA5', 'PCDHGA7', 'PCDH1', 'PCDHA11', 'PCDHA9', 'PCDH19', 'PCDHGA12']
Ets:57:r	37	7	25	7	8.2328	19456	4.82226e-17	5.35398e-16	81	70	70	13	['ETV1', 'ERG', 'ELF3', 'GABPA', 'ETS1', 'ETV6', 'ELK4', 'ELF4', 'EHF', 'ETV3L', 'ETV4', 'ELF2', 'SPI1']
Filament:308:G	37	7	30	7	7.68966	19456	4.82226e-17	5.35398e-16	312	104	102	16	['KRT76', 'GFAP', 'KRT23', 'KRT6C', 'NEFH', 'KRT80', 'KRT7', 'KRT1', 'SYNM', 'NEFM', 'KRT73', 'KRT17', 'KRT78', 'KRT12', 'KRT2', 'KRT9']
Forkhead:50:r	46	11	37	11	8.37241	19456	5.57418e-17	6.14481e-16	82	78	79	19	['FOXN2', 'FOXA1', 'FOXN1', 'FOXJ2', 'FOXO3', 'FOXK1', 'FOXN4', 'FOXB1', 'FOXS1', 'FOXJ1', 'FOXD3', 'FOXP4', 'FOXA2', 'FOXK2', 'FOXJ3', 'FOXO1', 'FOXR2', 'FOXF2', 'FOXD2']
Aldedh:239:k	22	2	16	2	7.93964	19456	5.73121e-17	6.25859e-16	462	43	51	4	['ALDH2', 'ALDH1A3', 'ALDH1A1', 'ALDH3B2']
Plexin_cytopl:13:r	22	2	17	2	9.80471	19456	5.73121e-17	6.25859e-16	555	13	14	7	['PLXNA3', 'PLXNA4', 'PLXNA1', 'PLXNA2', 'PLXND1', 'PLXNC1', 'PLXNB3']
SPAN-X:61:k	22	2	13	2	10.2901	19456	5.73121e-17	6.25859e-16	95	10	10	3	['SPANX-N1', 'SPANXD', 'SPANXN3']
Helicase_C:55:r	39	8	31	8	6.80867	19456	9.66982e-17	1.05103e-15	111	196	198	20	['SMARCA2', 'DDX17', 'DDX4', 'DDX27', 'CHD4', 'CHD2', 'EP400', 'DDX24', 'DDX47', 'IFIH1', 'SKIV2L', 'HLTF', 'ERCC6L', 'YTHDC2', 'SMARCAL1', 'SMARCA4', 'WRN', 'DDX3X', 'EIF4A3', 'SNRNP200']
Homeobox:51:r	100	43	91	42	7.08224	19456	1.16535e-16	1.26369e-15	57	381	420	54	['CUX2', 'HOXD11', 'NKX2-8', 'ALX1', 'GBX2', 'OTX2', 'ESX1', 'HOXC13', 'LBX1', 'HOXD9', 'DUXA', 'SIX5', 'ZHX1', 'VSX2', 'DPRX', 'POU3F4', 'HOXD10', 'ZFHX4', 'CRX', 'VENTX', 'POU6F2', 'ALX4', 'PITX2', 'DMBX1', 'MSX2', 'HESX1', 'HOXB13', 'GSX1', 'SHOX', 'HOXA1', 'HOXB9', 'PAX4', 'VAX2', 'SIX3', 'HOPX', 'HOXC6', 'HOXA3', 'PAX3', 'HOXC9', 'POU2F2', 'HOXC5', 'HOXA9', 'OTX1', 'PAX6', 'HOXD13', 'DLX3', …
Glycos_transf_2:60:r	34	6	31	6	8.88254	19456	1.17439e-16	1.26758e-15	170	44	41	12	['GALNTL4', 'GALNT10', 'GALNT14', 'GALNT5', 'GALNTL6', 'GALNTL5', 'GALNT7', 'GALNT12', 'GALNT8', 'GALNT13', 'WBSCR17', 'B3GNTL1']
Cadherin_C:121:r	34	6	28	6	9.1957	19456	1.17439e-16	1.26758e-15	132	34	33	10	['CDH1', 'CDH11', 'CDH6', 'CDH9', 'CDH15', 'CDH19', 'CDH8', 'CDH7', 'CDH10', 'CDH12']
P53:157:p	57	17	17	17	9.94113	19456	1.86763e-16	2.00652e-15	196	33	33	1	['TP53']
Reprolysin:18:g	31	5	16	5	7.56767	19456	2.31348e-16	2.46277e-15	199	93	93	10	['ADAM22', 'ADAMTS18', 'ADAMTS2', 'ADAM32', 'ADAM12', 'ADAM33', 'ADAM11', 'ADAM18', 'ADAM19', 'ADAM28']
F5_F8_type_C:124:r	31	5	26	5	8.04074	19456	2.31348e-16	2.46277e-15	127	50	67	8	['F5', 'F8', 'MFGE8', 'NRP2', 'RS1', 'CNTNAP4', 'EDIL3', 'AEBP1']
AMP-binding:286:r	31	5	24	5	7.7849	19456	2.31348e-16	2.46277e-15	423	73	80	12	['DIP2B', 'DIP2A', 'AASDH', 'ACSM2B', 'ACSL6', 'SLC27A2', 'ACSL5', 'ACSM4', 'DIP2C', 'ACSF3', 'SLC27A5', 'ACSBG1']
Cystatin:49:t	25	3	22	3	8.9385	19456	2.51682e-16	2.65493e-15	92	23	29	4	['CST1', 'KNG1', 'CST4', 'CSTA']
Interferon:49:e	25	3	25	3	9.79649	19456	2.51682e-16	2.65493e-15	160	16	16	5	['IFNA13', 'IFNA17', 'IFNE', 'IFNB1', 'IFNA4']
SET:12:k	25	3	14	3	7.21152	19456	2.51682e-16	2.65493e-15	169	100	96	5	['WHSC1', 'SETD2', 'EZH1', 'SUV39H2', 'NSD1']
Furin-like:115:e	25	3	13	3	9.54856	19456	2.51682e-16	2.65493e-15	149	20	19	2	['ERBB3', 'EGFR']
SH2:16:l	79	30	36	30	7.54952	19456	2.52299e-16	2.65542e-15	77	215	240	11	['PIK3R2', 'PIK3R1', 'SLA', 'JAK2', 'BMX', 'SHC3', 'SHB', 'RASA1', 'PTPN11', 'TNS4', 'CRKL']
DAO:213:q	28	4	28	4	9.05309	19456	3.24912e-16	3.40426e-15	336	48	30	2	['PDPR', 'FOXRED1']
Pkinase_Tyr:169:p	70	25	46	25	4.97813	19456	6.44147e-16	6.68878e-15	260	1213	1264	26	['TIE1', 'ACVRL1', 'ABL2', 'NTRK1', 'FGFR2', 'SYK', 'BRAF', 'FGR', 'ITK', 'LYN', 'LCK', 'LTK', 'ROR2', 'CSK', 'MAP3K13', 'PTK2B', 'TYK2', 'NPR2', 'JAK1', 'PDGFRB', 'EPHB2', 'NTRK2', 'TESK2', 'HCK', 'EPHA5', 'SRMS']
Homeobox:52:R	89	37	78	36	6.91412	19456	6.70102e-16	6.912e-15	57	381	420	53	['ZHX1', 'HOXA6', 'GSX2', 'SIX6', 'NOTO', 'MIXL1', 'HMX1', 'PITX1', 'HHEX', 'HOXA4', 'LASS6', 'EN1', 'MSX1', 'ZFHX4', 'ONECUT1', 'LASS3', 'OTX1', 'HOXD1', 'PAX3', 'ZFHX3', 'PITX2', 'NKX6-2', 'LBX1', 'BSX', 'PBX3', 'MNX1', 'PITX3', 'CDX1', 'VAX2', 'NKX2-5', 'DLX3', 'HDX', 'DLX6', 'PAX7', 'CUX1', 'ISX', 'MEOX1', 'EN2', 'NKX3-1', 'MEOX2', 'LEUTX', 'OTX2', 'HOXB1', 'ZFHX2', 'HOXC5', 'ISL1', 'HESX1', …
MH1:65:r	21	2	13	2	8.45748	19456	7.08342e-16	7.19477e-15	103	34	34	6	['SMAD5', 'SMAD3', 'SMAD6', 'SMAD9', 'NFIB', 'SMAD2']
CRAL_TRIO:128:r	21	2	13	2	8.05309	19456	7.08342e-16	7.19477e-15	159	45	45	5	['SEC14L5', 'SEC14L1', 'CLVS2', 'MOSPD2', 'SEC14L4']
Clat_adaptor_s:41:a	21	2	21	2	8.37502	19456	7.08342e-16	7.19477e-15	142	35	36	5	['AP3S1', 'AP2M1', 'AP2S1', 'AP1S1', 'AP4M1']
OST3_OST6:285:r	21	2	11	2	10.7376	19456	7.08342e-16	7.19477e-15	293	19	7	1	['TUSC3']
DUF4749:65:e	21	2	7	2	9.08552	19456	7.08342e-16	7.19477e-15	97	22	22	2	['PDLIM5', 'LDB3']
SNF2_N:114:e	21	2	17	2	7.16991	19456	7.08342e-16	7.19477e-15	350	80	83	8	['BTAF1', 'SHPRH', 'ATRX', 'CHD1', 'RAD54L2', 'C9orf102', 'SMARCA4', 'CHD5']
AMP-binding:413:v	33	6	17	6	7.8751	19456	7.49142e-16	7.56392e-15	423	73	80	1	['AASDH']
P53:105:e	78	30	22	30	10.3936	19456	7.49563e-16	7.56392e-15	196	33	33	2	['TP73', 'TP53']
Pkinase_Tyr:224:r	68	24	55	24	4.93631	19456	9.45536e-16	9.47982e-15	260	1213	1264	27	['EGFR', 'TNK2', 'DSTYK', 'EPHA7', 'SYK', 'HCK', 'TGFBR2', 'FYN', 'ILK', 'EPHA5', 'EPHA1', 'ABL2', 'RET', 'TESK1', 'TYRO3', 'GUCY2F', 'KIT', 'ACVR1C', 'EPHB2', 'MST1R', 'MAP3K7', 'ZAP70', 'KDR', 'LCK', 'MATK', 'EPHB1', 'TESK2']
Filament:186:r	42	10	38	10	7.87252	19456	1.04496e-15	1.04541e-14	312	104	102	24	['KRT75', 'KRT86', 'KRT35', 'KRT38', 'KRT33A', 'KRT40', 'KRT17', 'KRT28', 'KRT31', 'KRT76', 'KRT18', 'KRT7', 'KRT6A', 'KRT33B', 'KRT5', 'KRT25', 'KRT26', 'KRT84', 'KRT12', 'SYNC', 'BFSP2', 'KRT16', 'KRT36', 'KRT27']
Aa_trans:192:k	30	5	18	5	8.73759	19456	1.61435e-15	1.59447e-14	409	35	40	4	['SLC38A10', 'SLC38A4', 'SLC38A1', 'SLC36A2']
PAS:15:f	35	7	35	7	7.46173	19456	1.66195e-15	1.63801e-14	113	88	113	1	['CLOCK']
Trypsin:9:k	57	18	29	18	7.17816	19456	2.03087e-15	1.99317e-14	221	210	224	14	['GZMM', 'PRSS3', 'TPSAB1', 'F11', 'MASP2', 'CELA3B', 'OVCH1', 'F12', 'GZMB', 'PLAU', 'AZU1', 'PRSS38', 'TMPRSS11B', 'KLK8']
Sushi:34:r	204	124	134	115	7.16684	19456	2.1881e-15	2.13897e-14	56	146	808	21	['CSMD3', 'CSMD2', 'SRPX', 'CFHR5', 'C4BPB', 'CR1', 'CFHR3', 'CFH', 'CR1L', 'CFHR4', 'SRPX2', 'CR2', 'APOH', 'GABBR1', 'IL2RA', 'F13B', 'CFHR2', 'FBLN7', 'C4BPA', 'SELE', 'CFHR1']
PHD:38:e	24	3	14	3	6.13768	19456	2.35857e-15	2.28585e-14	52	167	194	5	['SP140L', 'DPF1', 'PHF19', 'KDM5B', 'CXXC1']
Peptidase_C14:236:g	24	3	10	3	8.06517	19456	2.35857e-15	2.28585e-14	248	50	51	2	['CASP2', 'CASP8']
PX:83:r	24	3	18	3	7.05109	19456	2.35857e-15	2.28585e-14	113	104	103	9	['SNX11', 'SNX24', 'SNX15', 'SNX18', 'SNX7', 'NCF4', 'SNX19', 'SNX21', 'SNX25']
BAH:31:n	27	4	11	4	8.69806	19456	2.55898e-15	2.46467e-14	121	26	37	3	['MTA3', 'DNMT1', 'PBRM1']
zf-C2H2_6:24:H	249	162	176	157	5.81285	19456	2.95998e-15	2.82748e-14	27	782	2521	98	['ZNF283', 'ZNF677', 'ZNF208', 'ZNF721', 'ZNF93', 'ZNF568', 'ZNF780B', 'ZNF701', 'ZNF311', 'ZNF91', 'ZNF586', 'ZNF652', 'ZNF320', 'ZNF98', 'ZSCAN12', 'ZNF668', 'ZNF267', 'ZNF573', 'PRDM2', 'ZNF85', 'ZNF678', 'ZNF773', 'OSR1', 'ZNF333', 'ZNF135', 'ZNF667', 'ZNF621', 'ZSCAN30', 'ZNF43', 'ZNF331', 'ZNF479', 'ZNF107', 'ZNF117', 'ZNF492', 'ZNF141', 'ZNF566', 'ZNF90', 'ZFP28', 'ZNF878', 'ZNF169', 'ZNF1…
7tm_4:33:l	115	56	108	55	7.17157	19456	3.25877e-15	3.10016e-14	280	469	454	77	['OR7D2', 'OR1G1', 'OR8H2', 'OR5H14', 'OR2K2', 'Q8NH80', 'OR4C46', 'OR2H2', 'OR4C6', 'OR13D1', 'OR4B1', 'OR6P1', 'OR2T6', 'OR2AT4', 'OR8J3', 'OR7G1', 'OR9I1', 'OR4D5', 'OR6Q1', 'OR5B3', 'OR5M1', 'OR2G3', 'OR56A1', 'OR5H6', 'OR5K2', 'OR5H2', 'OR5I1', 'OR5AU1', 'OR4D10', 'OR8H1', 'OR1S2', 'OR2AE1', 'OR5D14', 'OR9Q2', 'OR4K2', 'OR5AS1', 'OR10J1', 'OR52N5', 'OR52A5', 'OR1I1', 'OR5AK2', 'OR2B2', 'OR5L…
Neur_chan_memb:27:t	32	6	25	6	7.59804	19456	4.63956e-15	4.36025e-14	238	87	94	15	['GABRB1', 'GLRA2', 'GABRR1', 'CHRNA4', 'HTR3A', 'GABRB3', 'GABRG1', 'GLRB', 'CHRNE', 'HTR3D', 'CHRNB2', 'CHRNA2', 'GLRA1', 'CHRNB4', 'CHRNA10']
Keratin_B2_2:16:C	32	6	31	6	6.5453	19456	4.63956e-15	4.36025e-14	45	53	195	15	['KRTAP9-9', 'KRTAP4-5', 'KRTAP10-6', 'KRTAP10-11', 'KRTAP10-1', 'KRTAP9-8', 'KRTAP10-10', 'KRTAP9-1', 'KRTAP10-4', 'KRTAP16-1', 'KRTAP10-5', 'KRTAP4-7', 'KRTAP4-2', 'KRTAP4-3', 'KRTAP9-3']
Kinesin:284:p	32	6	21	6	7.42471	19456	4.63956e-15	4.36025e-14	333	104	106	16	['KIF21A', 'KIF21B', 'KIF1A', 'KIF2C', 'KIF14', 'KIF1B', 'KIF3C', 'KIF25', 'KIFC1', 'KIF26B', 'KIF20A', 'KIF5A', 'KIF13B', 'KIF2B', 'KIF1C', 'KIF6']
Pkinase_Tyr:152:r	89	38	70	38	5.32458	19456	4.68761e-15	4.39653e-14	260	1213	1264	31	['PTK2', 'TNK2', 'DDR2', 'FGFR4', 'ERBB2', 'FGFR1', 'LIMK1', 'ILK', 'INSRR', 'ROR1', 'FGFR3', 'PDGFRB', 'KDR', 'ALK', 'PTK7', 'GUCY2F', 'EPHA2', 'IGF1R', 'ITK', 'FLT4', 'EPHA8', 'BTK', 'TIE1', 'EPHA7', 'LCK', 'NTRK2', 'AXL', 'EPHA3', 'MAP3K10', 'EPHA5', 'TGFBR2']
Cadherin:62:E	266	177	190	171	6.79534	19456	4.86559e-15	4.54513e-14	93	227	1363	77	['DSC1', 'FAT', 'CDH9', 'PCDHGA11', 'FAT2', 'PCDHB4', 'FAT4', 'CDHR2', 'PCDHA11', 'PCDHAC1', 'CDH6', 'PCDHA2', 'PCDHGA7', 'CDH18', 'PCDHGB1', 'PCDHB8', 'PCDHB15', 'CDH10', 'PCDHGB4', 'PCDHB5', 'PCDHA9', 'CDH26', 'CDH13', 'DSG1', 'PCDHGA12', 'PCDHA13', 'CDH20', 'PCDHA6', 'DSC2', 'CDH8', 'CDH19', 'PCDHA7', 'CDH1', 'PCDHB13', 'PCDHGA1', 'PCDH12', 'CELSR3', 'PCDHGA8', 'PCDHB3', 'DCHS1', 'CDHR1', 'CDH…
Y_phosphatase:17:r	41	10	23	10	6.97102	19456	4.94604e-15	4.61102e-14	235	152	186	11	['PTPN14', 'PTPRD', 'PTPN12', 'PTPRU', 'PTPRM', 'PTPRE', 'PTPRB', 'PTPRG', 'PTPRJ', 'PTPRH', 'PTPN18']
Laminin_G_2:97:G	47	13	28	13	6.6738	19456	5.23441e-15	4.8701e-14	126	111	262	13	['CNTNAP5', 'NRXN1', 'CSPG4', 'LAMA3', 'NRXN2', 'FAT3', 'COL24A1', 'CNTNAP2', 'CELSR3', 'CELSR1', 'FAT4', 'PROS1', 'CNTNAP3']
P53:99:s	104	49	28	49	10.8087	19456	8.97006e-15	8.31249e-14	196	33	33	1	['TP53']
Spectrin:99:r	66	24	51	24	5.77706	19456	9.52036e-15	8.80492e-14	105	94	685	13	['SPTBN2', 'SPTB', 'SPTAN1', 'DST', 'MACF1', 'ACTN2', 'KALRN', 'SPTBN1', 'SPTBN5', 'TRIO', 'UTRN', 'ACTN1', 'SPTBN4']
P53:97:p	52	16	14	16	9.80867	19456	1.23069e-14	1.13369e-13	196	33	33	1	['TP53']
P53:67:a	83	35	24	35	10.4833	19456	1.29312e-14	1.18885e-13	196	33	33	1	['TP53']
Keratin_B2_2:30:s	50	15	50	15	7.18916	19456	1.53573e-14	1.40911e-13	45	53	195	17	['KRTAP10-2', 'KRTAP10-10', 'KRTAP12-1', 'KRTAP4-6', 'KRTAP4-1', 'KRTAP4-8', 'KRTAP10-11', 'KRTAP4-12', 'KRTAP9-9', 'KRTAP4-5', 'KRTAP9-3', 'KRTAP4-11', 'KRTAP4-3', 'KRTAP9-7', 'KRTAP10-4', 'KRTAP4-2', 'KRTAP4-4']
RhoGAP:65:r	48	14	32	14	7.25378	19456	1.84934e-14	1.6902e-13	152	178	179	17	['ARHGAP25', 'SRGAP3', 'ARHGAP39', 'ARHGAP40', 'ARHGAP19', 'ARHGAP22', 'ARHGAP20', 'BCR', 'ARHGAP27', 'ARHGAP24', 'ARHGAP1', 'STARD13', 'ARHGAP8', 'RACGAP1', 'SYDE1', 'ARHGAP15', 'ARHGAP36']
Sushi:37:g	132	70	93	69	6.53881	19456	1.92289e-14	1.75055e-13	56	146	808	25	['F13B', 'CSMD3', 'CSMD2', 'CFH', 'CR1', 'C7', 'CFHR4', 'SELL', 'CFHR2', 'SEZ6', 'C2', 'CR2', 'CFHR5', 'CFHR1', 'C6', 'CFHR3', 'SUSD3', 'PAPPA', 'CFB', 'SEZ6L', 'CR1L', 'C4BPA', 'APOH', 'SELE', 'SRPX']
Ephrin_lbd:76:r	26	4	14	4	8.72379	19456	1.94411e-14	1.75358e-13	178	35	35	8	['EPHB2', 'EPHA8', 'EPHA4', 'EPHA5', 'EPHB1', 'EPHA3', 'EPHA2', 'EPHB3']
SNF2_N:289:f	26	4	16	4	7.47803	19456	1.94411e-14	1.75358e-13	350	80	83	6	['CHD2', 'BTAF1', 'SMARCA4', 'CHD5', 'C9orf102', 'CHD4']
zf-C2H2_4:8:k	67	25	49	25	5.2865	19456	1.94507e-14	1.75358e-13	24	1179	977	26	['ZNF644', 'ZNF169', 'ZNF672', 'ZBTB17', 'KLF17', 'ZSCAN10', 'EGR3', 'ZNF775', 'ZNF551', 'ZNF581', 'ZNF337', 'ZNF238', 'SALL1', 'ZNF423', 'ZNF668', 'OSR2', 'ZNF556', 'ZNF878', 'ZNF256', 'ZNF333', 'ZNF439', 'MAZ', 'ZNF443', 'ZNF530', 'ZNF699', 'PRDM8']
Defensin_beta_2:1:k	26	4	25	3	9.09818	19456	1.94411e-14	1.75358e-13	30	28	27	8	['DEFB123', 'DEFB106B', 'DEFB127', 'DEFB126', 'DEFB121', 'DEFB118', 'DEFB112', 'DEFB114']
zf-DHHC:49:k	26	4	14	4	8.46075	19456	1.94411e-14	1.75358e-13	134	42	42	8	['ZDHHC24', 'ZDHHC7', 'ZDHHC20', 'ZDHHC16', 'ZDHHC13', 'ZDHHC22', 'ZDHHC23', 'ZDHHC4']
Lig_chan-Glu_bd:48:e	38	9	30	9	8.9087	19456	1.96422e-14	1.76401e-13	115	45	45	7	['GRIA1', 'GRIK5', 'GRIN3A', 'GRIK2', 'GRIK3', 'GRID1', 'GRID2']
PH:21:r	103	49	78	48	6.81122	19456	1.96247e-14	1.76401e-13	105	511	522	43	['PLEKHA5', 'CNKSR2', 'CYTH3', 'SKAP1', 'ARAP1', 'ARHGAP15', 'COL4A3BP', 'AKT2', 'ARHGEF6', 'PLEKHM3', 'DEF6', 'SH3BP2', 'GAB3', 'CYTH1', 'ARHGAP22', 'PLEKHA6', 'MCF2', 'PLEKHA3', 'DOCK11', 'ARHGEF9', 'DOCK10', 'SKAP2', 'KALRN', 'PREX2', 'SPATA13', 'PLEKHA1', 'PHLPP1', 'GAB4', 'DOCK9', 'PLEK2', 'ACAP2', 'BTK', 'MPRIP', 'ADRBK2', 'RASGRF1', 'FGD6', 'AFAP1L1', 'PLEKHG3', 'MYO10', 'ITK', 'PRKD1', 'C…
SET:41:s	23	3	16	3	7.09123	19456	2.12259e-14	1.89526e-13	169	100	96	8	['SUV39H2', 'SETD1B', 'EHMT1', 'EZH2', 'SETD5', 'KMT2D', 'MLL3', 'SETD1A']
SSF:342:v	23	3	12	3	8.58873	19456	2.12259e-14	1.89526e-13	406	26	34	2	['SLC5A4', 'SLC5A10']
MHC_I_C:13:s	23	3	14	3	7.46674	19456	2.12259e-14	1.89526e-13	28	74	74	2	['HLA-B', 'HLA-C']
EGF:9:g	82	35	65	35	6.39384	19456	3.46211e-14	3.07361e-13	32	245	555	23	['NOTCH4', 'SLIT3', 'NOTCH1', 'CRB1', 'NOTCH2', 'SNED1', 'VCAN', 'NOTCH3', 'MMRN1', 'DLL4', 'DNER', 'SLIT2', 'JAG2', 'CUBN', 'HGFAC', 'VWA2', 'DLL3', 'HSPG2', 'EYS', 'BCAN', 'EDIL3', 'CRB2', 'LRP1B']
EGF_CA:16:t	112	56	80	53	6.19346	19456	3.78201e-14	3.35122e-13	42	189	871	19	['FBN1', 'CD97', 'CUBN', 'FBN3', 'CRTAC1', 'UMODL1', 'LTBP2', 'LTBP4', 'FBN2', 'LTBP1', 'SUSD1', 'NOTCH1', 'EGFL6', 'EMR2', 'NOTCH2', 'NID1', 'NOTCH3', 'NELL1', 'JAG2']
P53:116:k	94	43	24	43	10.6628	19456	4.23443e-14	3.73787e-13	196	33	33	2	['TP63', 'TP53']
CH:108:q	33	7	15	7	6.12021	19456	5.12321e-14	4.51385e-13	109	187	270	8	['PLEC', 'ACTN1', 'PLS3', 'MICAL2', 'SPTB', 'PARVB', 'ACTN2', 'LCP1']
Laminin_G_2:59:e	66	25	35	25	7.1636	19456	5.88401e-14	5.16461e-13	126	111	262	10	['USH2A', 'EGFLAM', 'NRXN1', 'CNTNAP4', 'NRXN2', 'CELSR3', 'CRB1', 'LAMA3', 'CNTNAP2', 'COL24A1']
HLH:12:R	56	19	47	19	7.1918	19456	6.27074e-14	5.49369e-13	55	218	218	30	['NEUROG1', 'HES7', 'MAX', 'TCF4', 'TFEB', 'TCF12', 'OLIG3', 'TCF3', 'HES3', 'BHLHE41', 'SREBF1', 'TFAP4', 'NEUROG3', 'MSC', 'ARNT', 'FERD3L', 'TCF23', 'CLOCK', 'NCOA1', 'TCF21', 'NHLH2', 'HAND1', 'PTF1A', 'HES1', 'BHLHE23', 'HEYL', 'NEUROD1', 'SREBF2', 'HEY2', 'MSGN1']
EGF:30:G	69	27	52	27	6.14481	19456	7.17891e-14	6.25399e-13	32	245	555	25	['DLL1', 'EDIL3', 'HGFAC', 'MFGE8', 'EGFLAM', 'EYS', 'CRB1', 'CELSR1', 'SNED1', 'NOTCH2NL', 'DNER', 'SLIT3', 'NOTCH2', 'PTGS2', 'CELSR3', 'NOTCH1', 'NOTCH3', 'DLK1', 'FAT2', 'HABP2', 'JAG2', 'PTGS1', 'DLL4', 'NOTCH4', 'SLIT2']
F5_F8_type_C:109:r	35	8	27	8	8.21582	19456	7.50873e-14	6.51691e-13	127	50	67	13	['DDR1', 'EDIL3', 'DCBLD1', 'CNTNAP2', 'DCBLD2', 'F8', 'CNTNAP5', 'NRP2', 'DDR2', 'F5', 'CPXM2', 'MFGE8', 'CNTNAP1']
UDPGT:432:r	35	8	35	8	8.72732	19456	7.50873e-14	6.51691e-13	499	41	47	9	['UGT2B11', 'UGT2B10', 'UGT8', 'UGT2B4', 'UGT2B28', 'UGT2B17', 'UGT2B7', 'UGT2A1', 'UGT2A3']
Pkinase_Tyr:171:k	72	29	44	29	5.01877	19456	8.20662e-14	7.10935e-13	260	1213	1264	24	['MAP3K10', 'EPHB2', 'JAK1', 'FGFR2', 'TIE1', 'NTRK1', 'NTRK3', 'BMPR1B', 'EPHA7', 'TGFBR2', 'DDR2', 'EPHB4', 'ACVRL1', 'TEK', 'AXL', 'ROR2', 'BRAF', 'EPHA1', 'IGF1R', 'ROR1', 'INSRR', 'LMTK2', 'JAK3', 'ROS1']
Y_phosphatase:231:e	37	9	14	8	6.82292	19456	9.35018e-14	8.06995e-13	235	152	186	4	['PTPRU', 'PTPRD', 'PTPRF', 'PTPRK']
Cadherin_C_2:31:k	43	12	36	12	8.36944	19456	9.67233e-14	8.33254e-13	85	86	74	17	['PCDHG', 'PCDHGA1', 'PCDHB8', 'PCDHGB1', 'PCDHGB6', 'PCDHB13', 'PCDHB14', 'PCDHGA5', 'PCDHAC1', 'PCDHGA7', 'PCDHB1', 'PCDHGA8', 'PCDHGA3', 'PCDHGA11', 'PCDHAC2', 'PCDHGA6', 'PCDHA7']
P53:178:e	81	35	23	35	10.4481	19456	1.16461e-13	9.95767e-13	196	33	33	1	['TP53']
I-set:75:a	226	148	143	136	5.08102	19456	1.16658e-13	9.95767e-13	90	839	3800	46	['PALLD', 'HMCN1', 'PTPRK', 'NRG1', 'TTN', 'AMIGO1', 'NFASC', 'MYPN', 'LSAMP', 'OBSL1', 'DSCAML1', 'FGFR2', 'CNTN4', 'IGSF9', 'FLT1', 'CNTN6', 'NTRK3', 'NRCAM', 'LRIG2', 'IGSF10', 'PDGFRB', 'FLT4', 'MYOM2', 'NCAM2', 'OPCML', 'SDK2', 'CNTN5', 'OBSCN', 'VCAM1', 'UNC5D', 'LINGO2', 'NEO1', 'NTRK2', 'ROBO3', 'EMB', 'PXDNL', 'TYRO3', 'PRTG', 'DCC', 'IGFBPL1', 'PXDN', 'LINGO1', 'HSPG2', 'CADM3', 'MUSK',…
CUB:18:p	88	40	53	39	7.0729	19456	1.35791e-13	1.15696e-12	110	128	372	16	['CUBN', 'CSMD3', 'CSMD2', 'TLL1', 'GPR126', 'PDGFD', 'SEZ6L', 'MASP1', 'MASP2', 'TMPRSS15', 'PDGFC', 'ST14', 'ATRN', 'DMBT1', 'NRP2', 'SCUBE3']
Reprolysin:90:a	25	4	12	4	7.25733	19456	1.42282e-13	1.20784e-12	199	93	93	7	['ADAM12', 'ADAMTS16', 'ADAMTS20', 'ADAM2', 'ADAMTS5', 'ADAM18', 'ADAMTS2']
zf-CXXC:30:k	25	4	10	4	8.0416	19456	1.42282e-13	1.20784e-12	48	37	54	3	['MBD1', 'CXXC4', 'CXXC5']
FKBP_C:61:r	30	6	27	6	8.53596	19456	1.62266e-13	1.37497e-12	94	32	46	5	['FKBP9', 'FKBP10', 'FKBP5', 'FKBP7', 'FKBP15']
Lipase_GDSL:63:e	22	3	11	3	9.91162	19456	1.83136e-13	1.53504e-12	200	9	13	1	['PLB1']
Pentaxin:122:e	22	3	13	3	9.44214	19456	1.83136e-13	1.53504e-12	194	18	18	3	['PTX4', 'CRP', 'NPTXR']
Hexokinase_2:203:r	22	3	9	3	9.21974	19456	1.83136e-13	1.53504e-12	239	12	21	2	['HK1', 'HK3']
DED:69:r	22	3	8	3	7.63478	19456	1.83136e-13	1.53504e-12	82	37	63	2	['CASP8', 'PEA15']
Hist_deacetyl:7:R	22	3	12	3	8.15263	19456	1.83136e-13	1.53504e-12	306	42	44	4	['HDAC7', 'HDAC9', 'HDAC1', 'HDAC6']
DEAD:166:S	32	7	24	7	7.13026	19456	2.72254e-13	2.26976e-12	176	128	130	12	['DDX20', 'DDX50', 'DDX31', 'RECQL', 'EIF4A2', 'DDX60', 'SKIV2L2', 'DDX59', 'EIF4A1', 'BLM', 'DDX60L', 'SKIV2L']
ABC_membrane:219:k	32	7	31	7	7.39774	19456	2.72254e-13	2.26976e-12	274	68	108	6	['ABCC3', 'ABCB7', 'ABCC5', 'ABCC6', 'ABCC8', 'ABCC4']
p450:404:P	34	8	27	8	7.43274	19456	3.70415e-13	3.07709e-12	463	102	112	19	['CYP7A1', 'CYP2C19', 'CYP4V2', 'CYP27C1', 'CYP4F11', 'CYP4F3', 'CYP26A1', 'CYP7B1', 'CYP4A22', 'CYP2C9', 'CYP2J2', 'CYP2A7', 'CYP2F1', 'CYP24A1', 'CYP27B1', 'CYP2S1', 'CYP2A6', 'CYP4F2', 'CYP2U1']
EGF_CA:23:G	100	49	72	48	6.02996	19456	3.73381e-13	3.0962e-12	42	189	871	27	['FBLN2', 'FBN3', 'HMCN1', 'NOTCH2', 'FBN2', 'LTBP1', 'TLL2', 'FBN1', 'NELL2', 'LRP1B', 'NOTCH1', 'FBLN1', 'NELL1', 'CD93', 'EMR1', 'MATN2', 'THBS3', 'SCUBE1', 'FAT4', 'NOTCH3', 'CUBN', 'CCBE1', 'LTBP4', 'EGFL8', 'EMR3', 'MATN3', 'LRP2']
7tm_4:2:s	101	50	97	50	6.98429	19456	3.87942e-13	3.21122e-12	280	469	454	54	['OR51J1', 'OR5M1', 'OR5W2', 'OR4K2', 'OR9A4', 'OR2A25', 'OR4S2', 'OR4A5', 'OR56A3', 'OR5M3', 'OR1I1', 'OR4A16', 'OR5B3', 'OR2F2', 'OR5AS1', 'OR1L3', 'OR5H15', 'OR8H2', 'OR8I2', 'OR52K1', 'OR52N5', 'OR6P1', 'OR51I2', 'OR51F2', 'OR2A7', 'OR5F1', 'OR10A4', 'OR2A4', 'OR10Z1', 'OR5B21', 'OR4C6', 'OR4L1', 'OR2A2', 'OR11G2', 'OR6B1', 'ENSG00000176900', 'OR56B1', 'OR10R2', 'OR6S1', 'OR10AG1', 'OR10J5', …
VWA:113:G	40	11	33	11	6.52036	19456	4.35577e-13	3.59912e-12	175	144	248	9	['COL6A6', 'COL6A3', 'ITGAD', 'COL12A1', 'VIT', 'MATN2', 'COL7A1', 'COL14A1', 'ITGA2']
PHD:41:e	27	5	26	5	6.3076	19456	4.49453e-13	3.70719e-12	52	167	194	7	['KMT2D', 'PHF21A', 'PHF2', 'TAF3', 'MLL', 'DPF2', 'KDM5A']
Ig_2:71:v	70	29	43	29	4.59541	19456	6.36206e-13	5.22903e-12	79	811	1648	20	['HSPG2', 'CD244', 'CEACAM1', 'PSG1', 'FCRL4', 'SIGLEC12', 'SIGLEC1', 'IGSF1', 'FCRL5', 'FCRLB', 'CNTN5', 'PSG5', 'SIGLEC10', 'PSG4', 'FCRL1', 'SIGLEC7', 'PSG2', 'CD22', 'CEACAM6', 'CLMP']
fn3:80:g	165	100	124	99	4.96005	19456	7.49836e-13	6.11972e-12	85	419	3017	51	['EPHA3', 'USH2A', 'TTN', 'SORL1', 'TNR', 'NCAM2', 'CHL1', 'MYBPC2', 'TEK', 'CNTN1', 'SDK2', 'ROBO1', 'MYOM2', 'SDK1', 'TNN', 'NRCAM', 'IL6ST', 'FNDC4', 'COL12A1', 'PTPRF', 'CNTN4', 'DCC', 'NFASC', 'IGFN1', 'AXL', 'CNTN6', 'EGFLAM', 'FN1', 'ROBO2', 'CNTN3', 'EPHA7', 'IGDCC4', 'PTPRB', 'CNTN5', 'DSCAML1', 'PTPRD', 'FNDC3B', 'TNXB', 'TNC', 'MYBPC3', 'PTPRM', 'IGDCC3', 'TRIM9', 'CDON', 'DSCAM', 'MYO…
Ig_3:71:G	172	106	112	101	5.21203	19456	7.90672e-13	6.44169e-12	79	936	2641	48	['CNTN6', 'MDGA2', 'CADM3', 'KIRREL3', 'PXDNL', 'PSG1', 'HEPACAM2', 'PSG4', 'DSCAM', 'ROBO2', 'CNTN4', 'CNTN1', 'FLT1', 'CNTN3', 'FGFRL1', 'CADM2', 'LSAMP', 'CD22', 'CNTN5', 'IGDCC3', 'SIGLEC11', 'PTPRD', 'IGSF10', 'FLT4', 'PDGFRB', 'NCAM2', 'HMCN1', 'PSG5', 'NEO1', 'KDR', 'JAM2', 'OPCML', 'SIGLEC12', 'NPHS1', 'CD276', 'ROBO1', 'NEGR1', 'VCAM1', 'MDGA1', 'SDK2', 'FGFR2', 'ROBO3', 'FCRL1', 'L1CAM'…
Filament:94:e	29	6	27	6	7.33819	19456	9.14586e-13	7.3994e-12	312	104	102	15	['BFSP1', 'KRT75', 'KRT76', 'KRT79', 'KRT83', 'KRT24', 'SYNC', 'KRT12', 'KRT27', 'KRT31', 'KRT25', 'KRT5', 'KRT6A', 'BFSP2', 'KRT71']
ANF_receptor:196:r	29	6	23	6	7.50282	19456	9.14586e-13	7.3994e-12	352	92	91	12	['GRIK4', 'GRM3', 'GRM8', 'GRIA2', 'TAS1R2', 'GRIN2D', 'GPRC6A', 'GRID1', 'GRM2', 'GRM5', 'GRIN2A', 'GRM1']
UDPGT:129:p	29	6	27	6	8.45602	19456	9.14586e-13	7.3994e-12	499	41	47	9	['UGT2B15', 'UGT2B4', 'UGT1A6', 'UGT1A7', 'UGT2A3', 'UGT2B28', 'UGT2B11', 'UGT2B17', 'UGT2B7']
HLH:40:K	65	26	34	26	7.40681	19456	9.38362e-13	7.57857e-12	55	218	218	13	['NCOA1', 'TCF21', 'SOHLH2', 'TFEC', 'NEUROG1', 'MAX', 'TFAP4', 'MLX', 'ID3', 'NEUROD2', 'NHLH1', 'TAL2', 'MXD1']
ZZ:19:R	24	4	9	4	7.6715	19456	1.0017e-12	8.06215e-12	45	81	67	6	['DTNA', 'ZZEF1', 'SQSTM1', 'DYTN', 'AC022601.1', 'MIB1']
T-box:128:r	24	4	15	4	8.65013	19456	1.0017e-12	8.06215e-12	183	34	34	10	['TBX15', 'T', 'TBX1', 'TBX20', 'TBR1', 'TBX3', 'TBX5', 'TBX4', 'TBX18', 'TBX10']
p450:358:p	45	14	35	14	7.83713	19456	1.00492e-12	8.07405e-12	463	102	112	15	['CYP2E1', 'CYP7A1', 'CYP2A13', 'CYP3A43', 'PTGIS', 'CYP11A1', 'CYP2C19', 'CYP4F22', 'CYP4F3', 'CYP2A6', 'CYP2A7', 'CYP3A7', 'CYP2B6', 'CYP4B1', 'CYP7B1']
Cadherin:48:t	296	213	218	199	6.94951	19456	1.01894e-12	8.17258e-12	93	227	1363	73	['CDH22', 'DCHS1', 'PCDHA6', 'PCDHA13', 'FAT4', 'PCDHA10', 'CDH5', 'PCDHGC3', 'PCDHB12', 'CDH3', 'PCDHA7', 'PCDH11Y', 'PCDHGA6', 'PCDHA4', 'PCDHB8', 'PCDHB10', 'FAT3', 'FAT', 'CDH6', 'CDH9', 'PCDHA2', 'PCDH10', 'PCDHAC1', 'FAT2', 'PCDHA5', 'PCDH9', 'PCDHB4', 'PCDHGB6', 'PCDH8', 'PCDHB1', 'DSC2', 'PCDHA9', 'DSC1', 'CELSR2', 'PCDHB5', 'CDH11', 'DSG1', 'PCDH18', 'PCDHA3', 'PCDHB6', 'PCDH19', 'PCDHGA…
Filament:12:r	43	13	42	13	7.90647	19456	1.27099e-12	1.01592e-11	312	104	102	21	['NEFM', 'KRT35', 'KRT33A', 'KRT23', 'INA', 'KRT10', 'KRT36', 'KRT28', 'KRT73', 'KRT33B', 'KRT17', 'KRT15', 'KRT4', 'KRT26', 'SYNM', 'GFAP', 'KRT16', 'KRT19', 'KRT85', 'KRT32', 'KRT18']
PI3K_P85_iSH2:122:e	21	3	9	3	10.375	19456	1.51209e-12	1.20038e-11	161	9	9	2	['PIK3R1', 'PIK3R2']
Tubulin:107:r	21	3	21	3	8.25954	19456	1.51209e-12	1.20038e-11	197	39	39	11	['TUBB3', 'TUBAL3', 'TUBA1B', 'TUBA3E', 'TUBB6', 'TUBB2A', 'TUBA1C', 'TUBD1', 'TUBA1A', 'TUBA3C', 'TUBA8']
UCH:126:k	21	3	13	3	6.33549	19456	1.51209e-12	1.20038e-11	257	148	148	7	['USP35', 'USP21', 'USP46', 'USP3', 'USP19', 'USP20', 'USP38']
KH_1:2:l	33	8	33	8	6.32666	19456	1.7758e-12	1.40017e-11	66	101	234	6	['PCBP1', 'MEX3A', 'NOVA1', 'KHDRBS1', 'IGF2BP1', 'MEX3B']
Filament:143:E	33	8	25	8	7.5246	19456	1.7758e-12	1.40017e-11	312	104	102	12	['GFAP', 'KRT80', 'KRT35', 'KRT84', 'KRT31', 'KRT37', 'NEFM', 'KRT26', 'KRT10', 'KRT24', 'KRT39', 'KRT25']
SET:123:g	33	8	23	8	7.61206	19456	1.7758e-12	1.40017e-11	169	100	96	10	['SETD1B', 'SETD4', 'EZH1', 'PRDM2', 'SETD2', 'MLL', 'EZH2', 'NSD1', 'MLL5', 'SUV420H1']
Pkinase_Tyr:198:E	58	22	37	22	4.70683	19456	1.94404e-12	1.52765e-11	260	1213	1264	26	['FGFR2', 'ABL2', 'BLK', 'MUSK', 'BTK', 'ACVR1C', 'MAP3K11', 'FLT1', 'LCK', 'NTRK3', 'EPHA7', 'ALK', 'KSR2', 'EPHA5', 'LIMK2', 'JAK3', 'TXK', 'FLT3', 'MAP3K12', 'FGFR4', 'BRAF', 'RIPK1', 'FGR', 'LYN', 'FGFR3', 'EPHA8']
zf-C2H2:23:H	377	288	263	268	6.01626	19456	2.28352e-12	1.78537e-11	23	1207	3315	174	['ZNF3', 'ZNF624', 'ZKSCAN1', 'ZNF33A', 'ZNF234', 'ZNF771', 'ZNF665', 'ZNF486', 'ZNF347', 'ZNF454', 'ZNF202', 'ZNF192', 'ZNF436', 'ZNF568', 'ZNF780B', 'ZNF701', 'ZNF586', 'ZNF432', 'ZNF678', 'ZNF652', 'ZNF283', 'ZNF484', 'ZNF35', 'ZNF776', 'ZNF286A', 'ZNF569', 'ZNF37A', 'PRDM12', 'ZNF19', 'ZFP90', 'ZNF85', 'ZNF41', 'ZNF233', 'ZNF785', 'ZNF880', 'ZFP2', 'ZNF383', 'ZNF250', 'ZNF691', 'ZNF528', 'ZNF…
VWC:51:g	26	5	22	5	7.09818	19456	2.73581e-12	2.13182e-11	57	51	108	11	['VWC2', 'ECM2', 'THBS1', 'COL3A1', 'VWCE', 'CRIM1', 'CHRD', 'THBS2', 'PXDNL', 'FRAS1', 'COL2A1']
SH3_1:47:P	56	21	37	21	5.65392	19456	2.98918e-12	2.32536e-11	48	489	633	27	['PACSIN2', 'SORBS2', 'ITSN2', 'ARHGEF37', 'YES1', 'SPATA13', 'TRIO', 'NCK2', 'SPTAN1', 'DNMBP', 'SH3YL1', 'SRGAP3', 'CD2AP', 'SLA2', 'NOXA1', 'BTK', 'SORBS1', 'ITSN1', 'DOCK5', 'CSK', 'BLK', 'FCHSD2', 'NCF1', 'SKAP1', 'SH3RF2', 'LCK', 'OSTF1']
zf-C2H2_4:2:k	86	41	79	41	5.64668	19456	3.70239e-12	2.87058e-11	24	1179	977	27	['ZNF716', 'ZNF799', 'ZNF238', 'ZNF791', 'ZNF264', 'ZNF668', 'ZNF700', 'ZNF439', 'PRDM4', 'ZNF560', 'ZNF823', 'ZNF530', 'ZNF398', 'ZNF644', 'ZNF555', 'ZNF436', 'ZNF672', 'ZNF878', 'ZNF500', 'ZNF775', 'ZNF679', 'ZNF710', 'KLF9', 'ZNF236', 'ZNF441', 'ZNF497', 'IKZF4']
Cadherin:58:p	258	182	191	167	6.75129	19456	4.50899e-12	3.49016e-11	93	227	1363	71	['PCDH17', 'PCDHGB1', 'FAT3', 'PCDHB3', 'CDH3', 'CDH17', 'FAT2', 'PCDH11X', 'PCDHA8', 'DSG3', 'PCDHA6', 'CDH19', 'CDH22', 'PCDHA13', 'CDH6', 'PCDHB1', 'CDH9', 'PCDHB12', 'CDH7', 'FAT4', 'PCDHA7', 'PCDHGA11', 'PCDHGB2', 'DSC1', 'PCDHAC1', 'CDH8', 'PCDHA4', 'PCDHB8', 'PCDHA2', 'PCDHA5', 'PCDHB11', 'PCDHA11', 'DCHS1', 'PCDHA1', 'PCDHB4', 'PCDHB15', 'PCDH19', 'CDH20', 'FAT', 'CDH24', 'PCDHAC2', 'CDH1…
Filamin:94:g	42	13	22	13	6.29702	19456	4.74691e-12	3.66821e-11	103	28	304	3	['FLNC', 'FLNA', 'FLNB']
HCO3_cotransp:318:r	28	6	16	6	8.15263	19456	4.9854e-12	3.83975e-11	508	50	56	5	['SLC4A5', 'SLC4A10', 'SLC4A8', 'SLC4A7', 'SLC4A4']
GAGE:89:D	28	6	7	6	8.95998	19456	4.9854e-12	3.83975e-11	107	31	32	8	['GAGE2A', 'GAGE12J', 'GAGE12D', 'GAGE12H', 'PIWIL1', 'GAGE12F', 'GAGE12G', 'GAGE1']
Pkinase_Tyr:93:r	78	36	52	36	5.13425	19456	6.2591e-12	4.78117e-11	260	1213	1264	30	['MATK', 'LIMK2', 'EGFR', 'EPHA7', 'MET', 'INSR', 'ALK', 'JAK1', 'INSRR', 'ACVRL1', 'EPHB2', 'DDR2', 'NTRK2', 'EPHB3', 'TYK2', 'ITK', 'NTRK1', 'ABL2', 'TEK', 'EPHB1', 'TIE1', 'MERTK', 'FGFR4', 'MLKL', 'BRAF', 'FES', 'NTRK3', 'AATK', 'MUSK', 'SRMS']
Filament:98:r	47	16	45	16	8.03479	19456	6.70853e-12	5.11608e-11	312	104	102	24	['KRT32', 'KRT39', 'KRT31', 'KRT10', 'KRT36', 'KRT15', 'KRT6C', 'KRT74', 'KRT76', 'LMNA', 'BFSP2', 'KRT71', 'KRT12', 'NEFH', 'KRT82', 'KRT13', 'KRT8', 'KRT28', 'KRT40', 'KRT6A', 'KRT24', 'KRT75', 'LMNB1', 'NEFM']
P53:143:y	125	71	33	71	11.074	19456	6.74019e-12	5.13181e-11	196	33	33	1	['TP53']
Peptidase_M14:111:r	23	4	19	4	8.03234	19456	6.77357e-12	5.13203e-11	289	44	50	8	['CPB2', 'CPA6', 'CPO', 'CPB1', 'CPA4', 'CPXM2', 'CPD', 'CPE']
Reprolysin:30:e	23	4	18	4	7.13703	19456	6.77357e-12	5.13203e-11	199	93	93	11	['ADAM19', 'ADAMTS12', 'ADAM22', 'ADAMTS6', 'ADAM23', 'ADAMTS16', 'ADAM11', 'ADAMTS15', 'ADAM12', 'ADAM32', 'ADAM29']
OATP:46:e	23	4	23	4	8.46674	19456	6.77357e-12	5.13203e-11	543	37	37	7	['SLCO2A1', 'SLCO1B7', 'SLCO1C1', 'SLCO6A1', 'SLCO4C1', 'SLCO1B3', 'SLCO1B1']
PMG:97:f	30	7	30	7	10.1526	19456	7.01251e-12	5.29581e-11	180	14	15	3	['KRTAP13-1', 'KRTAP26-1', 'KRTAP13-3']
Neur_chan_LBD:107:r	30	7	27	7	7.55173	19456	7.01251e-12	5.29581e-11	216	88	91	14	['GABRB2', 'GABRP', 'GABRE', 'GABRR1', 'GABRA5', 'GABRG1', 'GABRB1', 'GLRA3', 'GABRB3', 'CHRNA5', 'GLRB', 'GABRA2', 'GABRA6', 'GLRA4']
p450:302:E	38	11	37	11	7.5932	19456	7.15537e-12	5.39494e-11	463	102	112	16	['CYP4F22', 'CYP2E1', 'CYP2F1', 'CYP2D6', 'CYP19A1', 'CYP2C18', 'CYP2C8', 'CYP4X1', 'CYP4Z1', 'CYP4A22', 'CYP7B1', 'CYP3A7', 'CYP24A1', 'CYP11B1', 'CYP3A5', 'CYP17A1']
WD40:12:s	198	131	115	126	6.17743	19456	7.3809e-12	5.55598e-11	38	506	1557	65	['RBBP4', 'ATG16L1', 'FBXW7', 'RRP9', 'CDC20B', 'GEMIN5', 'WDR27', 'APAF1', 'TLE3', 'KATNB1', 'STRN4', 'WDSUB1', 'NWD1', 'EML2', 'SPAG16', 'HERC1', 'ARPC1A', 'WDR69', 'NBEA', 'SMU1', 'WDR12', 'GRWD1', 'WDR1', 'TBL1X', 'ATG16L2', 'TBL1XR1', 'RFWD2', 'MLST8', 'CORO1C', 'CORO6', 'NUP43', 'EML3', 'STRAP', 'GNB1', 'WDR49', 'CDC40', 'DDB2', 'WDR36', 'CORO2A', 'TSSC1', 'WDR5B', 'TEP1', 'GNB4', 'RBBP7', …
Keratin_B2_2:22:C	32	8	32	8	6.5453	19456	8.26663e-12	6.17277e-11	45	53	195	10	['KRTAP9-2', 'KRTAP10-6', 'KRTAP4-11', 'KRTAP4-2', 'KRTAP9-8', 'KRTAP10-9', 'KRTAP4-7', 'KRTAP10-5', 'KRTAP10-11', 'KRTAP4-5']
VWC:27:s	32	8	24	8	7.39774	19456	8.26663e-12	6.17277e-11	57	51	108	10	['CHRD', 'WISP1', 'VWC2', 'ECM2', 'VWF', 'NELL2', 'CHRDL2', 'NELL1', 'COL5A2', 'PXDN']
WW:15:r	32	8	24	8	6.42471	19456	8.26663e-12	6.17277e-11	31	129	212	11	['MAGI3', 'SMURF2', 'NEDD4L', 'PIN1', 'WWP2', 'FNBP4', 'MAGI2', 'WWP1', 'SAV1', 'ITCH', 'PCIF1']
Spectrin:8:q	75	34	50	34	5.96149	19456	8.51299e-12	6.34654e-11	105	94	685	12	['SPTBN2', 'SPTBN4', 'SPTBN1', 'SPTAN1', 'SPTBN5', 'ACTN1', 'SYNE2', 'UTRN', 'SPTB', 'KALRN', 'DST', 'ACTN2']
Y_phosphatase:119:r	45	15	28	15	7.10532	19456	9.42357e-12	7.01415e-11	235	152	186	10	['PTPRK', 'PTPRD', 'PTPRG', 'PTPRR', 'PTPRU', 'PTPRZ1', 'PTPRF', 'PTPN1', 'PTPRA', 'PTPRH']
RRM_1:4:g	79	37	58	37	5.72849	19456	1.10987e-11	8.20842e-11	70	540	848	37	['HNRNPA1', 'EIF4B', 'HNRNPCL1', 'HNRNPH1', 'PABPC3', 'A1CF', 'HNRNPH3', 'MKI67IP', 'BOLL', 'RBM15', 'IGF2BP1', 'G3BP1', 'PPARGC1A', 'PPIL4', 'SYNCRIP', 'RBM19', 'RBM46', 'TIAL1', 'RBMS3', 'SPEN', 'RBM14', 'MSI1', 'ELAVL4', 'SART3', 'FLJ20273', 'RBM12', 'RBM47', 'CELF3', 'HNRPF', 'HNRNPH2', 'HNRPLL', 'RBM12B', 'RBM3', 'RALYL', 'ENOX1', 'IGF2BP2', 'NONO']
7tm_4:213:s	153	94	139	91	7.58347	19456	1.18934e-11	8.7822e-11	280	469	454	89	['OR4A16', 'OR6C74', 'OR2AK2', 'OR13D1', 'OR2H1', 'OR4K5', 'OR52E2', 'OR6C4', 'OR51E1', 'OR56B4', 'OR8H2', 'OR8H1', 'OR2AG2', 'OR51V1', 'OR8D1', 'OR4F6', 'OR5M11', 'OR51Q1', 'OR13J1', 'OR2B3', 'OR11G2', 'OR11H6', 'OR5F1', 'OR5B12', 'OR8K5', 'OR2AG1', 'OR51F1', 'OR8B4', 'OR2T27', 'OR2M3', 'OR9A4', 'OR9Q2', 'OR4C13', 'OR10J3', 'OR6N1', 'OR6P1', 'OR51A4', 'OR4A47', 'OR2T8', 'OR5J2', 'OR9A2', 'OR10G3…
CUB:10:g	64	27	40	26	6.61347	19456	1.24119e-11	9.15058e-11	110	128	372	13	['SEZ6', 'CSMD3', 'NETO1', 'TLL1', 'TMPRSS7', 'CUBN', 'TNFAIP6', 'BMP1', 'TLL2', 'PCOLCE', 'CSMD2', 'PDGFD', 'OVCH1']
Cadherin_2:33:r	70	31	51	31	8.29323	19456	1.27283e-11	9.369e-11	83	178	127	30	['PCDHA4', 'PCDHA2', 'PCDHGA6', 'PCDHB13', 'PCDHAC1', 'PCDHA12', 'PCDHGC4', 'PCDHA10', 'PCDHB4', 'PCDHB6', 'PCDHB2', 'PCDHGC5', 'PCDHB15', 'PCDHGA11', 'PCDHGB2', 'PCDHGA5', 'PCDHB1', 'PCDHA13', 'PCDHGB1', 'PCDHA3', 'PCDH10', 'PCDHGB7', 'PCDHA7', 'PCDHB12', 'PCDHGA12', 'PCDHA11', 'PCDH9', 'PCDHB5', 'PCDHA6', 'PCDHB11']
MFS_1:119:r	43	14	34	14	6.61311	19456	1.2948e-11	9.51564e-11	353	229	250	20	['SLC17A2', 'SLC17A6', 'SLC37A2', 'SLC17A1', 'SLC17A5', 'SPNS2', 'SLC22A24', 'SLC18A3', 'SLC16A5', 'SLC16A7', 'SLC43A1', 'SLC16A4', 'SV2B', 'HIATL1', 'SLC17A3', 'SLC16A14', 'SLC16A9', 'SPNS3', 'SV2A', 'MFSD10']
I-set:46:r	227	157	179	150	5.08739	19456	1.34141e-11	9.82715e-11	90	839	3800	63	['TTN', 'MYOM1', 'KIRREL2', 'CHL1', 'NCAM2', 'TMIGD1', 'PXDNL', 'FGFR3', 'CNTN3', 'OPCML', 'MYOM3', 'MYBPH', 'HMCN1', 'OBSCN', 'NTM', 'CNTN5', 'IGSF9', 'MDGA2', 'CADM3', 'LRRN3', 'FGFR2', 'ROBO1', 'NTRK3', 'PTPRD', 'PXDN', 'MUSK', 'CNTN4', 'CNTN6', 'IGDCC4', 'DSCAM', 'LSAMP', 'WFIKKN2', 'NEGR1', 'LRIG1', 'PDGFRB', 'FLT4', 'ROBO3', 'FLT1', 'MYBPC1', 'CNTN1', 'L1CAM', 'LRRC4B', 'IL1RL1', 'SPEG', 'L…
Cadherin_C:48:r	25	5	22	5	8.75209	19456	1.60444e-11	1.17172e-10	132	34	33	10	['CDH19', 'CDH8', 'DSG1', 'CDH6', 'CDH11', 'CDH15', 'CDH12', 'CDH18', 'CDH7', 'CDH10']
I-set:15:G	201	135	150	125	4.9119	19456	2.01679e-11	1.46595e-10	90	839	3800	49	['TTN', 'NFASC', 'SIGLEC1', 'SIGLEC6', 'PRTG', 'DSCAM', 'HSPG2', 'BOC', 'MUSK', 'CNTN1', 'NEGR1', 'L1CAM', 'PALLD', 'IGSF22', 'NTM', 'SDK2', 'NCAM2', 'ROBO2', 'NRCAM', 'CHL1', 'OPCML', 'MYBPHL', 'IGSF10', 'ROBO1', 'OBSCN', 'MDGA2', 'CNTN4', 'HMCN1', 'EMB', 'CNTN3', 'MYOM2', 'ROBO4', 'ISLR', 'MYPN', 'KDR', 'VCAM1', 'LRFN2', 'FGFR4', 'CNTN5', 'CNTN6', 'LRFN5', 'DSCAML1', 'WFIKKN2', 'PXDNL', 'PTPRK'…
Filament:208:s	27	6	26	6	7.23509	19456	2.62519e-11	1.89046e-10	312	104	102	14	['KRT36', 'KRT81', 'GFAP', 'KRT18', 'KRT73', 'KRT83', 'KRT74', 'KRT77', 'KRT71', 'DES', 'KRT35', 'NEFM', 'KRT86', 'KRT85']
Filamin:13:G	27	6	17	6	5.65959	19456	2.62519e-11	1.89046e-10	103	28	304	5	['FLNB', 'FLNA', 'FLNC', 'TRIM71', 'KDELC2']
Bromodomain:23:p	27	6	15	6	6.13273	19456	2.62519e-11	1.89046e-10	84	143	219	7	['PBRM1', 'TRIM24', 'BRWD1', 'BAZ1B', 'TIF1', 'ATAD2', 'SMARCA4']
LRR_6:14:d	54	21	44	20	6.20708	19456	2.66616e-11	1.91404e-10	24	158	416	19	['NLRP3', 'NLRP14', 'NLRP9', 'AMN1', 'FBXL7', 'NLRP2', 'NLRP4', 'FBXL14', 'LRRC23', 'NLRP12', 'NLRP5', 'B7', 'NLRC5', 'NOD1', 'C14orf166B', 'LRRC16A', 'NLRP13', 'TLR4', 'NLRP7']
zf-C2H2:8:k	253	181	204	169	5.44083	19456	2.74918e-11	1.9706e-10	23	1207	3315	119	['ZNF501', 'ZNF678', 'ZNF287', 'ZNF165', 'ZFP37', 'ZNF721', 'ZNF135', 'ZNF570', 'ZNF182', 'ZNF419', 'ZNF530', 'ZNF565', 'PRDM9', 'ZNF708', 'ZNF248', 'ZNF672', 'ZNF841', 'ZNF782', 'ZNF354C', 'ZNF25', 'ZNF765', 'ZNF343', 'SNAI3', 'ZBTB20', 'ZNF454', 'ZNF41', 'ZNF227', 'ZNF12', 'HKR1', 'ZNF605', 'ZNF16', 'ZNF345', 'ZNF22', 'ZSCAN10', 'SALL1', 'ZNF234', 'ZNF28', 'RBAK', 'ZNF83', 'PRDM16', 'ZNF845', '…
p450:99:R	37	11	34	11	7.55473	19456	2.79198e-11	1.99207e-10	463	102	112	24	['CYP4Z1', 'CYP4X1', 'CYP7A1', 'CYP2F1', 'CYP2C8', 'CYP17A1', 'CYP2B6', 'CYP26B1', 'CYP4F3', 'CYP4F11', 'CYP11A1', 'CYP3A4', 'CYP19A1', 'CYP4F2', 'CYP3A5', 'CYP3A7', 'CYP4F22', 'CYP1A2', 'CYP39A1', 'CYP46A1', 'CYP11B1', 'CYP27A1', 'CYP3A43', 'CYP4A22']
zf-C4:52:R	37	11	33	11	7.11416	19456	2.79198e-11	1.99207e-10	70	152	152	16	['RXRG', 'PPARD', 'THRA', 'HNF4G', 'THRB', 'NR4A2', 'NR3C1', 'NR5A1', 'AR', 'NR1D1', 'NR4A1', 'NR2E1', 'RORC', 'NR1H4', 'VDR', 'ESRRB']
Trypsin:99:k	60	25	27	25	7.25217	19456	3.27735e-11	2.32767e-10	221	210	224	9	['PRSS3', 'PROZ', 'ACR', 'TMPRSS15', 'PROC', 'KLK3', 'TMPRSS11E', 'PLG', 'KLK5']
ANF_receptor:98:r	35	10	28	10	7.77412	19456	3.3034e-11	2.33903e-10	352	92	91	17	['GRM7', 'GRID2', 'GABBR1', 'CASR', 'GRM5', 'GRM4', 'GRIA3', 'GRIN1', 'GRIK2', 'TAS1R1', 'NPR3', 'NPR2', 'GRM8', 'GRM1', 'GRM2', 'GRM6', 'GABBR2']
ABC_tran:121:r	35	10	30	10	6.67458	19456	3.3034e-11	2.33903e-10	137	141	195	14	['ABCC11', 'ABCB4', 'ABCB11', 'ABCC6', 'ABCD3', 'ABCC4', 'ABCC12', 'ABCB10', 'ABCC3', 'ABCC1', 'ABCB8', 'ABCA2', 'ABCD2', 'ABCB5']
7tm_4:192:l	119	68	115	68	7.2209	19456	3.36236e-11	2.37355e-10	280	469	454	71	['OR9G4', 'OR51S1', 'OR51F1', 'OR2AK2', 'OR4Q3', 'OR10S1', 'OR4A47', 'OR4N5', 'OR52E2', 'OR10G9', 'OR8U1', 'OR4A5', 'OR6M1', 'OR14C36', 'OR14A16', 'OR10V1', 'OR52N1', 'OR1M1', 'OR5M8', 'OR6Y1', 'OR52D1', 'OR52B2', 'OR56B4', 'OR13F1', 'OR52A5', 'OR52E4', 'OR2C3', 'OR52B6', 'OR51A2', 'OR51A4', 'OR6F1', 'OR4N4', 'OR4D10', 'OR5AP2', 'OR6C75', 'OR4K1', 'OR13C2', 'OR1L6', 'OR8S1', 'OR10G8', 'OR5B3', 'O…
RhoGAP:92:r	29	7	24	7	6.52679	19456	3.39242e-11	2.39114e-10	152	178	179	16	['ARHGAP36', 'ARHGAP12', 'ARHGAP11B', 'OPHN1', 'STARD8', 'ARAP3', 'ARHGAP8', 'ARHGAP29', 'ARHGAP22', 'ARAP2', 'ARHGAP10', 'ARHGAP40', 'ARHGAP26', 'ARHGAP30', 'ARHGAP20', 'ARHGAP15']
PYRIN:31:p	31	8	18	8	8.29947	19456	3.73349e-11	2.61898e-10	74	57	56	6	['NLRP3', 'NLRP9', 'PYHIN1', 'IFI16', 'NLRP4', 'MEFV']
ABC_tran:122:a	31	8	23	8	6.4995	19456	3.73349e-11	2.61898e-10	137	141	195	10	['ABCC10', 'ABCC9', 'ABCG1', 'ABCA9', 'ABCA4', 'ABCA12', 'ABCD4', 'ABCB5', 'ABCB1', 'ABCC4']
Cadherin_tail:71:r	52	20	2	20	9.46075	19456	4.16811e-11	2.91142e-10	133	42	42	19	['PCDHGB7', 'PCDHGC4', 'PCDHGA12', 'PCDHGB1', 'PCDHGB4', 'PCDHGA7', 'PCDHGA6', 'PCDHGA1', 'PCDHGA5', 'PCDHGB6', 'PCDHGA3', 'PCDHGC3', 'PCDHGA9', 'PCDHGB2', 'PCDHGB3', 'PCDHGA8', 'PCDHGA11', 'PCDHGC5', 'PCDHG']
PI3_PI4_kinase:242:k	22	4	16	4	8.44214	19456	4.39203e-11	3.05864e-10	250	31	36	6	['TRRAP', 'PIK3CA', 'ATM', 'PIK3CD', 'PIK3C2A', 'PIK3C3']
Glyco_hydro_31:234:a	22	4	12	4	10.0271	19456	4.39203e-11	3.05864e-10	435	9	12	2	['MGAM', 'SI']
IQ:12:R	47	17	46	17	6.6683	19456	4.87224e-11	3.38799e-10	21	109	263	20	['IQGAP1', 'ASPM', 'IQCF1', 'PPEF1', 'MYO5B', 'IQCF3', 'NRGN', 'MYO3A', 'MYO15A', 'IQCF2', 'MYO5A', 'SPA17', 'MYO7A', 'IQGAP3', 'MYO5C', 'MYO1D', 'MYO7B', 'SPATA17', 'MYO1A', 'IQCF5']
Pkinase:146:k	107	59	87	58	5.55759	19456	4.92906e-11	3.41729e-10	264	1221	1293	57	['TTBK2', 'RPS6KA3', 'CSNK2A2', 'NLK', 'NUAK2', 'MYO3A', 'VRK3', 'STK11', 'CHEK2', 'MAP2K4', 'ULK1', 'LATS1', 'PAK4', 'PIK3R4', 'NUAK1', 'NEK6', 'PIM1', 'CDKL2', 'PLK1', 'MAPK7', 'VRK1', 'GRK7', 'CDK19', 'STK32B', 'GRK4', 'CAMK1', 'LATS2', 'CDK13', 'NEK9', 'NEK7', 'MAPK1', 'STK35', 'MAP2K2', 'CDK9', 'PRKG1', 'PRKX', 'IKBKB', 'SCYL1', 'CDK8', 'STK31', 'IRAK3', 'SCYL3', 'MYLK2', 'MARK1', 'TAOK1', '…
Pkinase:109:e	107	59	69	58	5.55759	19456	4.92906e-11	3.41729e-10	264	1221	1293	49	['PAK3', 'DCLK1', 'IKBKB', 'SgK269', 'TRIB3', 'MAP3K1', 'NEK11', 'PIM2', 'CDK14', 'CAMK2G', 'PRKCH', 'PNCK', 'CDK8', 'CAMK2D', 'PXK', 'MAPK11', 'CAMK4', 'CDKL3', 'MAP3K15', 'MAP3K3', 'GSK3B', 'MAPK1', 'WEE1', 'RPS6KA4', 'NLK', 'CAMK1G', 'MARK4', 'MAPK14', 'MAPK4', 'PAK7', 'AKT2', 'RPS6KA2', 'ERN1', 'TNIK', 'GSK3A', 'TBK1', 'CDK10', 'MAPK3', 'NEK4', 'WNK2', 'TTBK2', 'PRKCE', 'RPS6KA6', 'ACVR2B', '…
Sushi:4:P	122	71	78	71	6.42516	19456	5.86794e-11	4.0501e-10	56	146	808	24	['CSMD2', 'CSMD3', 'CD55', 'SEZ6L2', 'SEZ6', 'CR2', 'CFHR4', 'CFH', 'SEZ6L', 'SUSD4', 'CFHR5', 'F13B', 'C4BPB', 'CFHR2', 'C1S', 'NCAN', 'SELE', 'MASP2', 'C4BPA', 'PAPPA2', 'CR1L', 'CFHR1', 'CR1', 'PAPPA']
Pkinase_Tyr:13:G	53	21	42	21	4.57677	19456	7.75165e-11	5.30377e-10	260	1213	1264	20	['FYN', 'BRAF', 'HCK', 'RET', 'TEC', 'TYK2', 'EPHA3', 'ABL2', 'NTRK3', 'FGR', 'EPHB1', 'EPHA8', 'CSK', 'EGFR', 'BMX', 'BLK', 'EPHA5', 'FLT3', 'TIE1', 'LCK']
Cadherin_2:63:R	75	36	50	36	8.39276	19456	8.93618e-11	6.09547e-10	83	178	127	33	['PCDHA4', 'PCDHA1', 'PCDHA10', 'PCDHA5', 'PCDHA2', 'PCDHB4', 'PCDHB7', 'PCDHA12', 'PCDHB15', 'PCDH11Y', 'PCDH10', 'PCDH18', 'PCDHG', 'PCDHGA7', 'PCDHA11', 'PCDHA3', 'PCDH11X', 'PCDHGA5', 'PCDHB3', 'PCDHB5', 'PCDHA13', 'PCDHGA12', 'PCDHGB1', 'PCDH19', 'PCDHA9', 'PCDHGA3', 'PCDHA8', 'PCDHGB3', 'PCDHB12', 'PCDH17', 'PCDH9', 'PCDHGA6', 'PCDHB6']
Crystall:80:r	24	5	24	5	7.95623	19456	9.05284e-11	6.12119e-10	82	20	55	7	['CRYBB2', 'CRYBB3', 'CRYBA1', 'CRYGN', 'CRYGC', 'CRYGS', 'AIM1']
AMP-binding:265:e	24	5	19	5	7.41566	19456	9.05284e-11	6.12119e-10	423	73	80	9	['SLC27A3', 'ACSM3', 'ACSS2', 'ACSM4', 'SLC27A5', 'ACSM2A', 'ACSM1', 'SLC27A6', 'ACSM2B']
Plectin:41:l	24	5	5	5	5.76031	19456	9.05284e-11	6.12119e-10	41	20	252	2	['PLEC', 'EVPL']
Myosin_head:83:k	24	5	23	5	6.93024	19456	9.05284e-11	6.12119e-10	677	99	112	9	['MYO15A', 'MYH1', 'MYH6', 'MYO1C', 'MYH10', 'MYH8', 'MYH13', 'MYH9', 'MYH15']
Pro-rich:113:p	24	5	23	5	9.41566	19456	9.05284e-11	6.12119e-10	168	7	20	2	['PRB2', 'PRB3']
BACK:5:l	24	5	17	5	7.07938	19456	9.05284e-11	6.12119e-10	103	106	101	8	['KLHL4', 'KLHL18', 'KLHL3', 'KBTBD7', 'KLHL20', 'KLHL5', 'KLHL25', 'LGALS3BP']
I-set:40:e	247	178	166	164	5.20921	19456	9.51027e-11	6.42116e-10	90	839	3800	56	['ROBO2', 'NCAM2', 'ROBO4', 'PXDN', 'TTN', 'HMCN1', 'MYBPC1', 'LRRN2', 'OBSCN', 'NFASC', 'LRFN2', 'PXDNL', 'CNTN5', 'MYPN', 'IGSF10', 'KIRREL3', 'CNTN4', 'CHL1', 'DSCAML1', 'FGFR2', 'LRRC4C', 'FLT1', 'NRG1', 'SPEG', 'HSPG2', 'CNTN6', 'IL1RAPL1', 'OBSL1', 'LRRN1', 'PAPLN', 'PTK7', 'NEGR1', 'L1CAM', 'ROBO1', 'MYBPC2', 'LRIT1', 'ADAMTSL3', 'MUSK', 'FGFR3', 'IGFN1', 'IGSF9', 'SIGLEC6', 'MYOM3', 'ROBO…
P53:89:s	43	15	10	15	9.5345	19456	1.05932e-10	7.12135e-10	196	33	33	1	['TP53']
VWA:100:R	43	15	33	15	6.6247	19456	1.05932e-10	7.12135e-10	175	144	248	9	['COL6A3', 'MATN4', 'COL6A6', 'VWF', 'ITGAD', 'MATN2', 'ITGA10', 'COL6A2', 'FLJ35880']
Y_phosphatase:25:g	36	11	16	10	6.7834	19456	1.06126e-10	7.12406e-10	235	152	186	7	['PTPRE', 'PTPRK', 'PTPRD', 'PTPRB', 'PTPRF', 'PTPN12', 'PTPRZ1']
ANF_receptor:7:k	26	6	20	6	7.34527	19456	1.33378e-10	8.88932e-10	352	92	91	8	['GRIK4', 'GRIA4', 'GRIK3', 'GRM2', 'GRM5', 'TAS1R1', 'TAS1R2', 'GRID2']
UDPGT:455:d	26	6	9	6	8.29848	19456	1.33378e-10	8.88932e-10	499	41	47	12	['UGT1A6', 'UGT1A5', 'UGT2B4', 'UGT2A1', 'UGT1A9', 'UGT1A3', 'UGT1A10', 'UGT1A4', 'UGT1A1', 'UGT1A7', 'UGT2B7', 'UGT1A8']
Reprolysin:88:d	26	6	16	6	7.31391	19456	1.33378e-10	8.88932e-10	199	93	93	5	['ADAMTS6', 'ADAMTS18', 'ADAMTS20', 'ADAMTS8', 'ADAMTS2']
Reprolysin:94:s	26	6	14	6	7.31391	19456	1.33378e-10	8.88932e-10	199	93	93	7	['ADAM22', 'ADAM12', 'ADAMTS19', 'ADAM15', 'ADAMTS3', 'ADAM32', 'ADAM18']
FGF:93:k	26	6	18	6	8.56767	19456	1.33378e-10	8.88932e-10	125	40	39	7	['FGF18', 'FGF13', 'FGF11', 'FGF12', 'FGF17', 'FGF3', 'FGF6']
C2:42:k	83	42	68	40	6.22161	19456	1.39899e-10	9.31061e-10	103	325	633	33	['PLCH1', 'SYT1', 'OTOF', 'MYOF', 'UNC13A', 'DYSF', 'SYTL5', 'SYTL1', 'SYT13', 'PIK3C2A', 'ESYT1', 'MCTP1', 'PRKCG', 'ITSN2', 'SYT11', 'CPNE4', 'SYT2', 'RPH3A', 'SYT14', 'UNC13C', 'RPGRIP1', 'CPNE6', 'SYT5', 'CPNE8', 'ESYT3', 'SYT7', 'PLCB3', 'RPGRIP1L', 'PRKCA', 'PCLO', 'RIMS1', 'CAPN6', 'RIMS4']
P53:36:l	79	39	24	39	10.412	19456	1.451e-10	9.64293e-10	196	33	33	1	['TP53']
Pkinase:40:k	104	58	69	58	5.51656	19456	1.47431e-10	9.78389e-10	264	1221	1293	51	['MAST4', 'HIPK2', 'SIK1', 'SGK1', 'PRKG1', 'ROCK1', 'PIM1', 'PLK4', 'CDK14', 'TSSK1B', 'CDKL2', 'ENSG00000168038', 'ACVR2A', 'ERN1', 'CAMK4', 'RPS6KB2', 'PSKH1', 'MAPK10', 'C9orf96', 'LATS1', 'RPS6KA1', 'TRIO', 'MAPK8', 'PKN2', 'RPS6KA4', 'MAP2K4', 'MASTL', 'DYRK3', 'ROCK2', 'HIPK4', 'DYRK2', 'PRKACA', 'RPS6KA6', 'MAPK13', 'MYO3A', 'PAK7', 'NEK5', 'PAK2', 'MAST1', 'STK24', 'CDC42BPA', 'AMHR2', '…
FAM47:235:r	32	9	21	9	9.50877	19456	1.51796e-10	1.00592e-09	257	7	25	2	['FAM47C', 'FAM47A']
Helicase_C:103:r	46	17	41	17	7.04683	19456	1.52316e-10	1.00793e-09	111	196	198	26	['FANCM', 'SMARCAD1', 'DDX53', 'DHX34', 'DHX35', 'DDX55', 'DDX43', 'DHX9', 'DDX18', 'C9orf102', 'DDX49', 'DDX4', 'TTF2', 'DDX27', 'SMARCA4', 'ASCC3', 'DDX1', 'SHPRH', 'DDX50', 'SMARCA5', 'SMARCA2', 'DDX56', 'DDX3X', 'DDX20', 'DDX31', 'DDX54']
Lig_chan:72:R	28	7	17	7	8.56767	19456	1.58735e-10	1.04743e-09	149	42	42	6	['GRIK3', 'GRID1', 'GRIK5', 'GRIA2', 'GRIK2', 'GRIA1']
Filamin:84:g	28	7	17	7	5.71206	19456	1.58735e-10	1.04743e-09	103	28	304	4	['FLNC', 'FLNB', 'TRIM2', 'FLNA']
GATA:13:R	30	8	25	8	8.77412	19456	1.63438e-10	1.07541e-09	36	34	39	7	['GATA3', 'GATA5', 'TRPS1', 'GATAD2A', 'GATA1', 'GATA6', 'GATA2']
PRY:25:e	30	8	18	8	7.75574	19456	1.63438e-10	1.07541e-09	49	82	79	11	['TRIM7', 'TRIM68', 'RFPL2', 'TRIM27', 'TRIM11', 'BTN3A3', 'TRIM50', 'RFPL3', 'TRIM25', 'MID1', 'TRIML1']
Cadherin:41:g	229	163	165	154	6.57926	19456	1.6599e-10	1.09066e-09	93	227	1363	63	['PCDHB1', 'FAT2', 'CDH6', 'PCDHA5', 'FAT3', 'PCDHAC1', 'PCDHA4', 'DSG2', 'CDH15', 'CDH7', 'PCDHB14', 'FAT4', 'PCDHGC3', 'CDH19', 'CDH12', 'FAT', 'CDH11', 'PCDHB8', 'DSG4', 'CDH18', 'CDH24', 'PCDHA11', 'PCDHB6', 'PCDHGB7', 'PCDHA3', 'CDH16', 'PCDHA8', 'PCDHGB3', 'PCDHAC2', 'CELSR2', 'PCDHB5', 'DSG1', 'CDHR1', 'CDH9', 'PCDHB2', 'CDHR2', 'CDH22', 'PCDHB7', 'PCDH19', 'PCDHGC5', 'PCDH9', 'CDH1', 'DCH…
Ldl_recept_b:24:r	52	21	51	21	7.44368	19456	2.21283e-10	1.44175e-09	42	28	170	10	['LRP2', 'LRP1', 'LRP5', 'LDLR', 'LRP4', 'SORL1', 'VLDLR', 'LRP6', 'LRP1B', 'NID1']
SPRY:70:G	44	16	34	16	7.23702	19456	2.30157e-10	1.49747e-09	120	148	166	17	['TRIM50', 'BTNL8', 'HNRNPU', 'HERC1', 'SPSB3', 'RFPL3', 'RFPL2', 'RANBP9', 'TRIM60', 'HNRPU', 'TRIM58', 'FSD1L', 'TRIM69', 'TRIM14', 'BTN3A3', 'FBXO45', 'TRIML2']
Cadherin:77:s	259	191	178	172	6.75687	19456	2.55686e-10	1.66125e-09	93	227	1363	78	['CDH1', 'PCDHA8', 'PCDHB8', 'PCDH9', 'PCDH7', 'PCDHAC2', 'FAT2', 'FAT', 'PCDHA13', 'PCDHGA6', 'PCDHGA11', 'PCDHAC1', 'PCDHGA1', 'PCDHB12', 'CDH10', 'CDH18', 'PCDHGB6', 'PCDHGA9', 'CDH12', 'PCDH17', 'PCDHA3', 'PCDHA5', 'PCDHA9', 'CDH11', 'PCDHGC3', 'PCDHA4', 'PCDHB7', 'DSC1', 'PCDHA10', 'PCDHB11', 'PCDH11X', 'PCDHGA7', 'PCDHB10', 'PCDHA11', 'FAT4', 'CDH6', 'PCDHB5', 'PCDHB3', 'PCDHGA3', 'FAT3', '…
CUB:81:p	61	27	39	26	6.54421	19456	2.60139e-10	1.68782e-09	110	128	372	9	['CSMD3', 'CSMD2', 'CUBN', 'SEZ6L2', 'C1S', 'TNFAIP6', 'ST14', 'LRP10', 'BMP1']
EGF:27:G	82	42	54	42	6.39384	19456	2.7085e-10	1.75147e-09	32	245	555	22	['NOTCH1', 'JAG2', 'SNED1', 'HABP2', 'CRB1', 'SLIT2', 'EYS', 'VCAN', 'JAG1', 'CRB2', 'NOTCH2', 'NOTCH3', 'AGRN', 'CELSR1', 'FAT', 'NOTCH2NL', 'EGFLAM', 'DLL1', 'DLL4', 'SLIT3', 'CUBN', 'DNER']
GAF:117:l	21	4	13	4	8.45748	19456	2.72585e-10	1.75147e-09	131	19	34	5	['PDE11A', 'PDE5A', 'PDE10A', 'PDE6C', 'PDE6B']
Kunitz_BPTI:17:r	21	4	16	4	7.93024	19456	2.72585e-10	1.75147e-09	53	36	49	10	['SPINT1', 'TFPI2', 'WFIKKN1', 'SPINLW1', 'SPINT3', 'SPINT2', 'APP', 'WFDC8', 'COL28A1', 'TFPI']
PDZ:35:p	82	42	52	42	6.05897	19456	2.7085e-10	1.75147e-09	82	388	700	29	['GRIP1', 'USH1C', 'LIN7A', 'PTPN13', 'PARD3', 'LNX1', 'DLG2', 'DLG5', 'PDLIM5', 'DLG4', 'MAGI2', 'NOS1', 'MAST4', 'LRRC7', 'MAGI1', 'SCRIB', 'MAGI3', 'PDZRN3', 'DLG1', 'AHNAK', 'MPDZ', 'IL16', 'TJP2', 'PCLO', 'GRASP', 'MAST1', 'APBA2', 'LNX2', 'CNKSR2']
UDPGT:146:l	21	4	18	4	7.99036	19456	2.72585e-10	1.75147e-09	499	41	47	8	['UGT8', 'UGT1A9', 'UGT3A2', 'UGT1A8', 'UGT3A1', 'UGT1A4', 'UGT2B11', 'UGT1A3']
AAA_8:176:r	21	4	19	4	8.90109	19456	2.72585e-10	1.75147e-09	268	25	25	5	['DNAH5', 'DNAH14', 'DNAH3', 'DNAH8', 'DNAH7']
DENN:84:v	21	4	19	4	7.87252	19456	2.72585e-10	1.75147e-09	186	51	51	2	['DENND1C', 'DENND1A']
Cadherin:23:a	240	174	186	163	6.64695	19456	2.89433e-10	1.85716e-09	93	227	1363	66	['PCDHGA1', 'PCDHB5', 'PCDHB12', 'PCDH19', 'PCDHA3', 'PCDH7', 'PCDHA9', 'FAT3', 'DSC1', 'FAT2', 'PCDHGA7', 'PCDHA12', 'CDH26', 'PCDHB2', 'FAT', 'FAT4', 'PCDHB10', 'PCDHA5', 'PCDHB1', 'PCDHGA6', 'DCHS1', 'CDH1', 'PCDH11Y', 'PCDHGA5', 'PCDHAC1', 'DSC2', 'PCDHA2', 'PCDH10', 'PCDHB4', 'DSG4', 'PCDH17', 'PCDHA10', 'PCDHGA3', 'PCDHB7', 'CDH2', 'PCDHGB4', 'PCDHA4', 'CDH10', 'DSG1', 'CDH3', 'PCDHGB3', 'P…
Laminin_G_2:99:l	47	18	26	18	6.6738	19456	3.00846e-10	1.92773e-09	126	111	262	12	['COL24A1', 'CELSR2', 'LAMA5', 'LAMA2', 'CNTNAP4', 'EGFLAM', 'CNTNAP1', 'NRXN1', 'COL11A1', 'NRXN2', 'CNTNAP2', 'CRB1']
Pkinase_Tyr:149:G	50	20	39	20	4.4927	19456	3.53512e-10	2.24663e-09	260	1213	1264	24	['YES1', 'ACVRL1', 'MAP3K10', 'FGFR3', 'FER', 'TEC', 'NPR1', 'FYN', 'TYRO3', 'BRAF', 'MLKL', 'LMTK2', 'FGFR2', 'EPHA5', 'RIPK2', 'BMX', 'GUCY2D', 'AXL', 'TGFBR2', 'JAK1', 'EPHA3', 'INSRR', 'ALK', 'TIE1']
Neur_chan_LBD:54:k	50	20	50	20	8.28869	19456	3.53512e-10	2.24663e-09	216	88	91	12	['GLRA1', 'CHRNA6', 'GABRA6', 'GABRA3', 'GABRA2', 'GLRA3', 'GLRA4', 'GABRG2', 'GABRA5', 'CHRND', 'CHRNA10', 'GABRA1']
P53:165:e	65	30	17	30	10.1306	19456	3.76165e-10	2.38734e-09	196	33	33	2	['TP53', 'TP63']
HEAT:18:e	23	5	22	5	7.79355	19456	4.90698e-10	3.08894e-09	31	146	59	3	['PPP2R1A', 'BRAT1', 'PPP2R1B']
7tm_3:77:r	23	5	18	5	8.1216	19456	4.90698e-10	3.08894e-09	234	47	47	7	['GRM6', 'CASR', 'GRM8', 'GRM7', 'GPRC5B', 'GRM2', 'GRM5']
AAA_8:25:r	23	5	23	5	9.03234	19456	4.90698e-10	3.08894e-09	268	25	25	6	['DNAH5', 'DNAH8', 'DNAH1', 'DNAH17', 'DNAH12', 'DNAH9']
Cadherin_tail:5:a	40	14	2	14	9.08224	19456	5.04889e-10	3.16116e-09	133	42	42	33	['PCDHA4', 'PCDHGC3', 'PCDHGA9', 'PCDHGA6', 'PCDHA1', 'PCDHA9', 'PCDHAC1', 'PCDHGB3', 'PCDHA10', 'PCDHGA8', 'PCDHGC5', 'PCDHGA12', 'PCDHGB7', 'PCDHGB1', 'PCDHA6', 'PCDHAC2', 'PCDHGB6', 'PCDHA13', 'PCDHGA1', 'PCDHA3', 'PCDHG', 'PCDHGA7', 'PCDHA7', 'PCDHA5', 'PCDHGC4', 'PCDHGB4', 'PCDHA12', 'PCDHGA3', 'PCDHA2', 'PCDHGA11', 'PCDHGB2', 'PCDHA8', 'PCDHGA5']
SPRY:68:v	40	14	34	14	7.09952	19456	5.04889e-10	3.16116e-09	120	148	166	23	['BTNL3', 'TRIM50', 'TRIM5', 'TRIM22', 'TRIM7', 'FBXO45', 'TRIM25', 'TRIM49', 'TRIML1', 'TRIM62', 'TRIM39', 'ENSG00000182053', 'RYR2', 'TRIM6', 'TRIM35', 'MID2', 'TRIM41', 'MID1', 'SPRYD3', 'TRIM27', 'SPSB1', 'SPSB3', 'ASH2L']
Filamin:45:q	25	6	15	6	5.54856	19456	6.52993e-10	4.04491e-09	103	28	304	4	['FLNB', 'FLNC', 'FLNA', 'TRIM3']
Kinesin:192:r	25	6	18	6	7.06857	19456	6.52993e-10	4.04491e-09	333	104	106	12	['KIF16B', 'KIF2A', 'KIF13A', 'KIF5C', 'KIF1B', 'KIF3A', 'KIF7', 'KIF18B', 'KIF6', 'KIF21B', 'KIF19', 'KIF27']
P53:111:e	63	29	19	29	10.0855	19456	6.70841e-10	4.14442e-09	196	33	33	1	['TP53']
Pkinase_Tyr:36:l	63	29	42	29	4.82613	19456	6.70841e-10	4.14442e-09	260	1213	1264	18	['INSRR', 'MAP3K7', 'ACVR1C', 'AXL', 'EGFR', 'HCK', 'EPHA1', 'JAK3', 'DDR2', 'ARAF', 'ERBB2', 'SYK', 'BRAF', 'FYN', 'MUSK', 'JAK1', 'ZAP70', 'SRMS']
MFS_1:193:p	29	8	27	8	6.04483	19456	6.92822e-10	4.26324e-09	353	229	250	6	['C6orf192', 'SLC22A25', 'SLC17A2', 'SLC17A3', 'SLC22A9', 'SLC17A6']
I-set:53:e	219	157	150	145	5.03563	19456	6.91891e-10	4.26324e-09	90	839	3800	55	['CNTN4', 'TTN', 'OBSCN', 'NEGR1', 'CNTN6', 'IGDCC3', 'LRRN1', 'ROBO1', 'MYBPC1', 'LRFN2', 'NTRK3', 'PAPLN', 'PALLD', 'KIRREL3', 'ROBO2', 'HSPG2', 'IGSF10', 'MDGA2', 'NTM', 'UNC5C', 'MYPN', 'L1CAM', 'MYBPC2', 'IGSF22', 'SDK1', 'TRIO', 'HMCN1', 'MYBPH', 'MYOM2', 'LRIG1', 'SDK2', 'LRFN5', 'ROBO4', 'CNTN3', 'PDGFRA', 'CADM3', 'MYBPC3', 'CNTN5', 'VCAM1', 'PRTG', 'DSCAM', 'SPEG', 'OPCML', 'NTRK2', 'IG…
Histone:119:T	29	8	29	8	8.05641	19456	6.92822e-10	4.26324e-09	132	61	62	11	['H2AFZ', 'HIST1H2AA', 'HIST1H2AC', 'HIST1H2AJ', 'HIST2H3D', 'HIST1H3J', 'H2AFX', 'H2BFWT', 'HIST1H2AH', 'H2AFV', 'HIST1H2BE']
SET:27:k	27	7	17	7	7.32255	19456	7.17593e-10	4.40401e-09	169	100	96	6	['WHSC1', 'SETD5', 'NSD1', 'SETD2', 'SETDB2', 'SETD6']
SRCR:71:g	38	13	35	13	6.32374	19456	7.28884e-10	4.46742e-09	100	56	270	10	['CD5L', 'MSR1', 'CD163', 'CFI', 'CD163L1', 'CD6', 'LOXL2', 'CD5', 'LOXL4', 'PRSS12']
C2:77:k	75	38	49	38	6.07539	19456	9.51031e-10	5.81366e-09	103	325	633	30	['PLCZ1', 'RIMS2', 'MCTP1', 'SYT17', 'RASA3', 'HECW2', 'ABR', 'PRKCB', 'SYTL5', 'PCLO', 'RASA2', 'SYTL4', 'ESYT1', 'SYT5', 'SYT13', 'WWP1', 'RIMS4', 'SYT12', 'SYT3', 'PLCD4', 'SYT10', 'SYT14', 'RAB11FIP2', 'SYT4', 'PRKCG', 'PLA2G4A', 'NEDD4L', 'BCR', 'MCTP2', 'MYOF']
Pkinase:161:r	105	61	71	59	5.53037	19456	1.06271e-09	6.4793e-09	264	1221	1293	51	['PAK4', 'ENSG00000168038', 'NEK10', 'MAPK9', 'CAMK2D', 'CSNK1A1', 'PRKCZ', 'TAOK1', 'MAPK8', 'EIF2AK4', 'MINK1', 'MAPK14', 'MGC42105', 'DYRK1B', 'MARK2', 'PRKAA2', 'SIK2', 'MAPK11', 'LATS1', 'MYO3B', 'CAMK2G', 'STK24', 'BRSK1', 'PIM1', 'TTBK1', 'MAPK10', 'MAP3K2', 'RPS6KB2', 'MAP2K3', 'PRKD2', 'CSNK2A1', 'ACVR2A', 'PRKCB', 'SCYL1', 'AKT3', 'MAPK13', 'GSK3A', 'ULK1', 'TBCK', 'MAP4K2', 'MYO3A', 'D…
Lectin_C:75:n	44	17	39	17	6.83727	19456	1.39685e-09	8.43917e-09	108	165	219	21	['PKD1L2', 'CD248', 'REG3G', 'SFTPD', 'FREM1', 'PRG3', 'LY75', 'OLR1', 'REG1B', 'PLA2R1', 'CLEC1B', 'REG4', 'COLEC12', 'CLEC4D', 'NCAN', 'SFTPA1', 'COLEC10', 'ASGR1', 'THBD', 'CLEC10A', 'CLEC3B']
Filament:175:r	34	11	33	11	7.56767	19456	1.41359e-09	8.51815e-09	312	104	102	20	['GFAP', 'KRT37', 'KRT83', 'KRT32', 'KRT14', 'KRT17', 'NEFM', 'KRT27', 'KRT16', 'KRT86', 'KRT77', 'KRT74', 'NEFH', 'KRT19', 'KRT73', 'KRT9', 'KRT18', 'KRT4', 'KRT7', 'KRT76']
fn3:13:s	181	125	127	110	5.09358	19456	1.42313e-09	8.56458e-09	85	419	3017	44	['CNTN5', 'TNXB', 'TTN', 'TNN', 'COL20A1', 'PTPRU', 'DSCAML1', 'PTPRB', 'TNR', 'AXL', 'COL12A1', 'MYOM2', 'FNDC3A', 'MYBPC2', 'MYOM1', 'TNC', 'SDK1', 'NEO1', 'MYBPC1', 'FN1', 'NFASC', 'PTPRD', 'CDON', 'EPHB2', 'DCC', 'USH2A', 'KAL1', 'IGDCC4', 'CNTN1', 'IGDCC3', 'EPHB1', 'PTPRK', 'CNTN3', 'CHL1', 'LIFR', 'PTPRF', 'TIE1', 'IGFN1', 'EPHA3', 'CMYA5', 'EPHA8', 'NCAM2', 'ITGB4', 'IL7R']
I-set:26:G	222	161	155	149	5.05526	19456	1.46078e-09	8.77975e-09	90	839	3800	58	['ROBO2', 'CNTN1', 'NRG1', 'TTN', 'PTPRK', 'PRTG', 'DSCAML1', 'MYOM3', 'LSAMP', 'IGSF10', 'PXDNL', 'HMCN1', 'FGFR3', 'LRIG1', 'UNC5D', 'CNTN4', 'MDGA2', 'FLT1', 'LINGO2', 'DSCAM', 'KIRREL3', 'ISLR', 'OBSL1', 'NTRK3', 'OBSCN', 'MYBPC1', 'HSPG2', 'IGSF9', 'MYBPC3', 'IL1RL1', 'NEGR1', 'LINGO4', 'MYBPH', 'PTK7', 'SIGLEC1', 'CNTN2', 'NEO1', 'KDR', 'CNTN6', 'MYOM2', 'NFASC', 'ROBO1', 'PTPRD', 'MYOM1', …
Calx-beta:35:r	39	14	33	14	7.55539	19456	1.63253e-09	9.77417e-09	100	26	118	5	['GPR98', 'SLC8A1', 'SLC8A3', 'ITGB4', 'FREM2']
Pkinase:58:p	117	71	88	70	5.68649	19456	1.63659e-09	9.78589e-09	264	1221	1293	49	['MAPK1', 'CSNK2A1', 'MAPK7', 'MYO3B', 'RIPK4', 'PAK3', 'LATS2', 'DCLK1', 'MAST2', 'LRRK1', 'HIPK1', 'TSSK2', 'MYLK4', 'PIM1', 'STK24', 'SBK1', 'TTBK1', 'RPS6KA6', 'CDKL5', 'MAP2K1', 'MAPK6', 'BUB1', 'PRKCB', 'STRADA', 'PRKAA2', 'MAPKAPK2', 'PRKACA', 'RAGE', 'NEK5', 'RPS6KA2', 'NUAK2', 'PRKCQ', 'MAP3K15', 'STK32A', 'WEE1', 'STK4', 'MYO3A', 'PNCK', 'ACVR1B', 'CDK1', 'AMHR2', 'ACVR2A', 'MAPK8', 'C9…
HLH:10:r	53	23	43	23	7.11237	19456	1.69758e-09	1.01245e-08	55	218	218	30	['ARNT', 'NEUROD6', 'MITF', 'TCF12', 'TFEC', 'TFE3', 'NEUROD1', 'ATOH1', 'TCF3', 'HAND1', 'MSGN1', 'BHLHE23', 'PTF1A', 'TCF4', 'MYCL1', 'MNT', 'TWIST1', 'TFEB', 'OLIG3', 'MESP2', 'TCF21', 'NEUROD4', 'MSC', 'SREBF2', 'ASCL1', 'NHLH1', 'SIM1', 'USF2', 'TAL2', 'TFAP4']
P53:172:l	50	21	12	21	9.75209	19456	1.7046e-09	1.01534e-08	196	33	33	1	['TP53']
DnaJ:22:r	32	10	24	10	8.02335	19456	1.87506e-09	1.1126e-08	63	73	70	12	['DNAJB5', 'DNAJC8', 'DNAJC6', 'DNAJC7', 'DNAJB8', 'DNAJC11', 'DNAJC5', 'DNAJC19', 'DNAJB6', 'DNAJC21', 'DNAJC5G', 'DNAJC10']
Cadherin_tail:100:r	32	10	2	10	8.76031	19456	1.87506e-09	1.1126e-08	133	42	42	15	['PCDHAC1', 'PCDHA10', 'PCDHA4', 'PCDHAC2', 'PCDHA1', 'PCDHA6', 'PCDHA8', 'PCDHA12', 'PCDHA5', 'PCDHA9', 'PCDHA7', 'PCDHA3', 'PCDHA2', 'PCDHA13', 'PCDHA11']
hEGF:20:P	82	44	57	44	6.15483	19456	2.15308e-09	1.27432e-08	22	104	655	19	['SNED1', 'SLIT1', 'NOTCH2', 'NOTCH4', 'NOTCH1', 'DLL1', 'NOTCH3', 'DNER', 'JAG1', 'MEGF11', 'DLL3', 'FBN2', 'MEGF10', 'FBN3', 'SLIT2', 'JAG2', 'CRB1', 'FAT4', 'MEGF6']
7tm_4:259:P	243	181	196	172	8.25089	19456	2.23009e-09	1.31822e-08	280	469	454	154	['OR2C3', 'OR2G3', 'OR4M1', 'OR6C75', 'OR6C68', 'OR51D1', 'OR10R2', 'OR6C6', 'OR4N5', 'OR5L2', 'OR4N4', 'OR6C65', 'OR51A4', 'OR4E2', 'OR10G8', 'OR8U1', 'OR51B5', 'OR1L8', 'OR2T12', 'OR1G1', 'OR2T33', 'OR2B2', 'Q8NH80', 'OR4C13', 'OR13C4', 'OR2G2', 'OR52I2', 'OR6V1', 'OR5B2', 'OR51G2', 'OR14K1', 'OR8D4', 'OR5H2', 'OR5K3', 'OR9A4', 'OR1E1', 'OR52E8', 'OR52B2', 'OR5M9', 'OR1J1', 'OR5H15', 'OR5H1', '…
zf-C2H2_6:21:k	280	215	222	196	5.98213	19456	2.49924e-09	1.47544e-08	27	782	2521	113	['ZNF560', 'ZNF117', 'MECOM', 'ZNF208', 'ENSG00000221895', 'ZNF345', 'ZNF490', 'ZNF273', 'ZNF135', 'ZNF672', 'ZNF317', 'ZNF160', 'ZNF154', 'ZNF419', 'ZNF773', 'ZNF554', 'ZNF211', 'ZNF668', 'ZNF667', 'GZF1', 'ZNF16', 'ZNF799', 'ZNF256', 'ZNF404', 'ZNF808', 'ZNF43', 'ZNF14', 'ZNF677', 'ZNF107', 'ZNF492', 'ZNF567', 'GFI1B', 'ZNF844', 'ZNF320', 'ZNF493', 'ZNF267', 'ZNF483', 'ZFP2', 'ZSCAN2', 'ZNF813'…
Cadherin_C:25:d	22	5	22	5	8.56767	19456	2.55094e-09	1.49647e-08	132	34	33	8	['CDH9', 'CDH2', 'CDH10', 'CDH5', 'CDH12', 'CDH1', 'CDH20', 'CDH6']
Ephrin_lbd:38:r	22	5	14	5	8.48278	19456	2.55094e-09	1.49647e-08	178	35	35	7	['EPHA10', 'EPHA4', 'EPHA7', 'EPHB1', 'EPHA8', 'EPHA3', 'EPHB4']
Cadherin_C_2:74:p	22	5	20	5	7.40261	19456	2.55094e-09	1.49647e-08	85	86	74	13	['PCDHB8', 'PCDHB5', 'PCDHGA7', 'PCDHB15', 'PCDHA5', 'PCDHB10', 'PCDHB7', 'PCDHGA6', 'PCDHGB6', 'PCDHGB2', 'PCDHGB1', 'PCDHB4', 'PCDH10']
EGF:26:e	86	47	63	47	6.46255	19456	2.54985e-09	1.49647e-08	32	245	555	26	['SLIT1', 'F12', 'NOTCH2', 'SNED1', 'NOTCH4', 'DLL4', 'PROZ', 'HABP2', 'NOTCH1', 'PLAT', 'CUBN', 'DLL1', 'NOTCH3', 'DNER', 'JAG1', 'DLL3', 'SLIT3', 'CRB2', 'CELSR3', 'CRB1', 'EYS', 'JAG2', 'SLIT2', 'VCAN', 'F7', 'LTBP2']
Lig_chan-Glu_bd:112:k	22	5	20	5	8.12021	19456	2.55094e-09	1.49647e-08	115	45	45	6	['GRIK4', 'GRIN3B', 'GRIK3', 'GRID2', 'GRID1', 'GRIA1']
Kelch_1:2:r	64	31	57	31	6.48374	19456	3.01109e-09	1.76418e-08	46	122	407	25	['KLHL3', 'KLHL20', 'ATRN', 'KBTBD10', 'KEAP1', 'KLHL4', 'KLHL14', 'KLHL34', 'LZTR1', 'KLHL8', 'KLHL29', 'KLHL13', 'KLHL1', 'KBTBD5', 'KLHL28', 'KLHL10', 'KLHL36', 'KLHDC8B', 'KLHL23', 'KLHL35', 'HCFC2', 'KLHL9', 'KLHL15', 'KLHL2', 'KLHL32']
BACK:8:A	24	6	18	6	7.07938	19456	3.07632e-09	1.78665e-08	103	106	101	13	['KLHL6', 'KEAP1', 'KLHL7', 'IPP', 'KLHL18', 'BTBD2', 'KLHL33', 'BTBD17', 'KLHL30', 'KLHL13', 'KLHL1', 'ENC1', 'KBTBD10']
Glycos_transf_2:71:l	24	6	20	6	8.38004	19456	3.07632e-09	1.78665e-08	170	44	41	13	['GALNT3', 'WBSCR17', 'GALNT8', 'GALNTL6', 'GALNT10', 'GALNT13', 'GALNT16', 'B4GALNT1', 'GALNTL1', 'GALNT6', 'GALNTL4', 'GALNT7', 'ALG5']
UCH:179:p	24	6	18	6	6.52814	19456	3.07632e-09	1.78665e-08	257	148	148	16	['USP21', 'USP40', 'USP25', 'USP33', 'USP35', 'USP47', 'USP28', 'USP2', 'USP36', 'USP43', 'USP10', 'USP37', 'USP17L2', 'USP39', 'USP48', 'USP31']
SCAN:9:r	24	6	23	6	7.09374	19456	3.07632e-09	1.78665e-08	90	100	100	11	['ZNF498', 'ZKSCAN3', 'ZNF174', 'ZSCAN21', 'ZSCAN18', 'ZNF445', 'MZF1', 'PEG3', 'PGBD1', 'ZNF323', 'ZNF232']
NACHT:7:G	24	6	18	6	7.6932	19456	3.07632e-09	1.78665e-08	166	73	66	10	['NLRP7', 'NLRP8', 'NLRP14', 'NLRP5', 'NLRP3', 'NLRC4', 'NLRP1', 'NLRC5', 'NLRP4', 'NOD1']
RhoGEF:4:E	24	6	20	6	6.05811	19456	3.07632e-09	1.78665e-08	181	200	205	15	['NET1', 'TIAM2', 'FARP1', 'PLEKHG1', 'ECT2L', 'ITSN1', 'FGD6', 'FGD4', 'TIAM1', 'VAV1', 'FGD2', 'ARHGEF9', 'NGEF', 'ARHGEF1', 'ARHGEF19']
Cadherin_C:90:G	24	6	17	6	8.6932	19456	3.07632e-09	1.78665e-08	132	34	33	8	['CDH7', 'DSG4', 'CDH18', 'CDH19', 'CDH10', 'DSC2', 'CDH1', 'CDH9']
PID:114:e	26	7	18	7	7.15263	19456	3.13046e-09	1.81356e-08	140	93	104	7	['APBB2', 'APBB1', 'NOS1AP', 'APBA2', 'RABGAP1', 'SHC3', 'MAPK8IP2']
Cadherin_C_2:49:a	26	7	20	7	7.64362	19456	3.13046e-09	1.81356e-08	85	86	74	15	['PCDHGC5', 'PCDHG', 'PCDHA9', 'PCDHB4', 'PCDHAC1', 'PCDHB12', 'PCDHGA1', 'PCDH10', 'PCDHGA11', 'PCDHGB6', 'PCDHB15', 'PCDHB13', 'PCDHB14', 'PCDHGB1', 'PCDHA4']
SH2:72:e	54	24	37	23	7.00063	19456	3.1429e-09	1.8185e-08	77	215	240	21	['PTPN11', 'SH2D6', 'SLA', 'TENC1', 'LCP2', 'GRB2', 'PIK3R1', 'CRK', 'ABL2', 'ITK', 'SH2D1B', 'GRB10', 'CHN1', 'SHE', 'MATK', 'FER', 'SH2B1', 'PTPN6', 'SHB', 'PLCG1', 'SHF']
I-set:28:p	195	139	145	127	4.86818	19456	4.1917e-09	2.41036e-08	90	839	3800	52	['HMCN1', 'TTN', 'MYOM2', 'L1CAM', 'ROBO2', 'MYPN', 'TRAD', 'CHL1', 'MYBPC1', 'NTRK3', 'DSCAM', 'CNTN4', 'CNTN6', 'MUSK', 'LRIG1', 'CNTN5', 'ROBO4', 'IGSF22', 'NEGR1', 'LRIG3', 'MYBPC2', 'PAPLN', 'PTK7', 'OBSCN', 'DSCAML1', 'NFASC', 'IGSF9', 'NTM', 'PTPRD', 'FGFR2', 'MYBPH', 'VCAM1', 'FLT1', 'SIGLEC1', 'PDGFRA', 'OPCML', 'PXDNL', 'CDON', 'NCAM2', 'PRTG', 'MYBPC3', 'HSPG2', 'CNTN3', 'NRCAM', 'KAZA…
SH2:68:s	55	25	45	25	7.0271	19456	4.27519e-09	2.44928e-08	77	215	240	14	['SOCS2', 'PIK3R1', 'LYN', 'VAV1', 'SH2D7', 'SHC4', 'PLCG1', 'ITK', 'PTPN11', 'LCK', 'SYK', 'INPPL1', 'SH2D1B', 'STAT5B']
LIM:47:k	55	25	36	25	6.26156	19456	4.27519e-09	2.44928e-08	58	181	408	18	['LPXN', 'ZYX', 'FBLIM1', 'PRICKLE4', 'FHL5', 'PDLIM5', 'FHL1', 'LIMA1', 'LHX6', 'ABLIM3', 'PDLIM7', 'ENSG00000093100', 'JUB', 'LMO2', 'PXN', 'LHX5', 'PRICKLE1', 'CSRP3']
V-set:95:s	97	56	64	54	6.61812	19456	4.3018e-09	2.4615e-08	109	958	562	28	['CD48', 'VPREB1', 'PIGR', 'PSG6', 'PSG8', 'CEACAM3', 'VSIG1', 'VSTM2A', 'SIRPA', 'CEACAM7', 'CD300LG', 'PSG1', 'SIRPB1', 'ERMAP', 'PDCD1', 'VSTM2L', 'SCN3B', 'IGSF3', 'VSTM4', 'TREML4', 'PSG9', 'IGSF8', 'IGSF6', 'CADM4', 'VSIG2', 'BTNL3', 'CADM1', 'CD79B']
Y_phosphatase:183:R	49	21	28	21	7.22818	19456	4.59671e-09	2.62701e-08	235	152	186	13	['PTPRM', 'PTPRK', 'PTPN13', 'PTPRE', 'PTPRF', 'PTPRN', 'PTPN7', 'PTPRD', 'PTPN6', 'PTPRU', 'PTPN18', 'PTPN2', 'PTPRJ']
I-set:80:g	198	142	141	138	4.8902	19456	4.69317e-09	2.67885e-08	90	839	3800	48	['TTN', 'CNTN1', 'PTPRK', 'NTRK3', 'DSCAML1', 'PALLD', 'MYPN', 'FGFR3', 'VCAM1', 'CNTN5', 'ROBO2', 'CNTN4', 'MYOM2', 'HMCN1', 'CD101', 'ADAMTSL3', 'ROBO3', 'PRTG', 'NTM', 'SDK1', 'IL1RAPL1', 'ROBO1', 'OPCML', 'PTPRD', 'PXDNL', 'TRAD', 'LSAMP', 'IGFN1', 'CNTN2', 'OBSL1', 'DCC', 'LRIG3', 'MDGA2', 'IGSF9', 'DSCAM', 'NEO1', 'LINGO4', 'MYBPC1', 'NRG2', 'PXDN', 'IGFBP7', 'MYOM3', 'IGSF10', 'HSPG2', 'IG…
FAM47:247:r	38	14	25	14	9.7567	19456	5.14977e-09	2.93204e-08	257	7	25	3	['FAM47C', 'FAM47B', 'FAM47A']
Pkinase_Tyr:150:L	69	35	63	35	4.95737	19456	5.15565e-09	2.93204e-08	260	1213	1264	14	['ACVR1C', 'FLT3', 'ERBB4', 'RAF1', 'FLT4', 'KIT', 'BRAF', 'KDR', 'TEC', 'ANKK1', 'PTK2B', 'EGFR', 'MST1R', 'LIMK2']
Sema:146:R	38	14	27	14	8.23063	19456	5.14977e-09	2.93204e-08	428	70	72	13	['SEMA3F', 'SEMA3G', 'SEMA3D', 'SEMA5B', 'SEMA3C', 'PLXNA4', 'SEMA3A', 'PLXNA1', 'SEMA4D', 'SEMA5A', 'SEMA7A', 'SEMA4C', 'PLXNA2']
Pkinase_Tyr:115:k	59	28	37	27	4.73149	19456	5.60232e-09	3.1758e-08	260	1213	1264	23	['CSK', 'ABL1', 'MATK', 'NTRK1', 'EPHA7', 'BMPR1B', 'NTRK2', 'ARAF', 'EPHB4', 'ROR2', 'EPHA4', 'MST1R', 'INSRR', 'MAP3K11', 'FGFR3', 'PDGFRA', 'ITK', 'EPHB3', 'NPR1', 'ACVR1C', 'TGFBR2', 'FLT4', 'FGFR2']
ig:21:s	66	33	40	33	4.12422	19456	5.72846e-09	3.24194e-08	87	1005	2154	17	['NFASC', 'IGSF1', 'LILRA4', 'FLT1', 'KIR3DL1', 'IL6R', 'PDGFRB', 'FCRL4', 'SEMA3E', 'LILRA2', 'FCRL3', 'LILRB5', 'KIR2DL4', 'LILRB4', 'KDR', 'MCAM', 'CEACAM1']
Filament:14:A	31	10	31	10	7.4344	19456	6.79298e-09	3.83042e-08	312	104	102	17	['NEFM', 'KRT18', 'KRT84', 'KRT24', 'KRT37', 'KRT14', 'KRT6A', 'KRT20', 'KRT85', 'KRT74', 'KRT4', 'KRT79', 'KRT32', 'KRT15', 'KRT16', 'KRT71', 'KRT35']
GPS:9:d	31	10	13	10	7.69743	19456	6.79298e-09	3.83042e-08	42	85	85	4	['LPHN3', 'CELSR2', 'EMR2', 'ELTD1']
C2:47:P	88	50	55	50	6.306	19456	8.49e-09	4.76998e-08	103	325	633	33	['SMURF2', 'DYSF', 'UNC13C', 'SYTL1', 'PLCZ1', 'OTOF', 'MYOF', 'DOC2A', 'SYT10', 'RASA2', 'TOLLIP', 'BAIAP3', 'PCLO', 'RIMS3', 'MCTP2', 'SYT5', 'PLA2G4D', 'PLCD4', 'ITCH', 'UNC13D', 'CPNE5', 'HECW2', 'RPH3A', 'CPNE9', 'PLCB4', 'SYT1', 'PLA2G4A', 'SYNGAP1', 'MCTP1', 'SYT12', 'CC2D1A', 'CPNE8', 'UNC13B']
p450:100:r	29	9	28	9	7.20326	19456	8.97309e-09	5.02273e-08	463	102	112	14	['CYP4A11', 'CYP2C19', 'CYP2D6', 'CYP4F2', 'CYP2J2', 'CYP4X1', 'CYP7B1', 'CYP2R1', 'CYP2A13', 'CYP7A1', 'CYP1A1', 'CYP3A4', 'CYP4F11', 'CYP11B1']
Kringle:72:e	29	9	18	9	7.31017	19456	8.97309e-09	5.02273e-08	79	39	104	3	['PLG', 'HGF', 'LPA']
SOCS_box:13:R	29	9	25	8	8.20326	19456	8.97309e-09	5.02273e-08	35	61	56	14	['ASB10', 'ASB11', 'ASB18', 'ASB3', 'ASB12', 'ASB9', 'SOCS6', 'ASB2', 'ASB16', 'RAB40B', 'SPSB2', 'ASB7', 'ASB8', 'ASB5']
Kelch_1:9:v	57	27	51	27	6.31663	19456	9.64191e-09	5.37819e-08	46	122	407	30	['ENC1', 'KLHL7', 'KLHL5', 'KBTBD12', 'KLHL35', 'KLHDC5', 'KLHDC10', 'KLHL21', 'IVNS1ABP', 'KLHL4', 'KLHL2', 'KLHDC8A', 'KLHL17', 'KLHL31', 'ATRNL1', 'KLHL3', 'KLHL1', 'KLHL36', 'KLHL18', 'KEAP1', 'KLHL8', 'KLHL34', 'KLHL33', 'KLHDC8B', 'KBTBD5', 'KLHL29', 'KLHL22', 'KLHL24', 'KLHDC7A', 'KLHL14']
Ldl_recept_a:9:q	84	47	75	47	7.30654	19456	1.08939e-08	6.06928e-08	37	82	302	16	['LRP1B', 'LRP1', 'LRP2', 'LDLR', 'SORL1', 'C6', 'CORIN', 'RXFP1', 'LRP12', 'LRP3', 'TMPRSS9', 'LRP4', 'HSPG2', 'TMPRSS15', 'LRP6', 'RXFP2']
MFS_1:64:v	27	8	20	8	5.94173	19456	1.1257e-08	6.24168e-08	353	229	250	11	['SLC16A7', 'SLC16A6', 'SV2B', 'SLC17A2', 'SLC37A1', 'SV2C', 'SLC45A3', 'MFSD7', 'MFSD9', 'SLC17A6', 'SLC17A1']
WW:8:v	27	8	17	8	6.1796	19456	1.1257e-08	6.24168e-08	31	129	212	7	['HECW1', 'NEDD4', 'SETD2', 'SMURF2', 'MAGI1', 'WWP1', 'MAGI2']
RabGAP-TBC:32:e	27	8	26	8	7.02487	19456	1.1257e-08	6.24168e-08	215	118	118	4	['GRTP1', 'TBCK', 'TBC1D20', 'USP6']
Cadherin_2:16:v	34	12	23	12	7.25141	19456	1.15465e-08	6.39455e-08	83	178	127	13	['PCDHAC2', 'PCDHGA5', 'PCDHA9', 'PCDHGA6', 'PCDHA2', 'PCDHA5', 'PCDHGA11', 'PCDHGA1', 'PCDHA11', 'PCDHA1', 'PCDHA4', 'PCDHGA8', 'PCDHGB1']
SH3_1:8:a	42	17	26	17	5.23889	19456	1.17335e-08	6.4904e-08	48	489	633	20	['EPS8L1', 'NGEF', 'SH3RF3', 'SORBS2', 'SH3PXD2A', 'GRAP2', 'HCLS1', 'FYN', 'DNMBP', 'ARHGEF37', 'SORBS3', 'NCF4', 'DLG3', 'BLK', 'NCK2', 'STAM', 'AHI1', 'ITSN1', 'NCF2', 'SH3RF1']
C1-set:19:n	21	5	16	5	5.63206	19456	1.26963e-08	6.90796e-08	89	334	241	10	['CD1C', 'HLA-G', 'TAPBP', 'B2M', 'HFE', 'SIRPA', 'HHLA2', 'HLA-DPA1', 'HLA-DOB', 'HLA-F']
Myosin_head:145:r	21	5	20	5	6.73759	19456	1.26963e-08	6.90796e-08	677	99	112	10	['MYO1E', 'MYH7', 'MYO1H', 'MYO1C', 'MYO7A', 'MYO1F', 'MYO1A', 'MYO1G', 'MYO5C', 'MYO7B']
I-set:50:t	218	162	159	155	5.02903	19456	1.26002e-08	6.90796e-08	90	839	3800	48	['FGFR1', 'TTN', 'MUSK', 'SDK1', 'DSCAM', 'CNTN6', 'IL1RL1', 'IGSF22', 'ROBO1', 'IGSF10', 'HMCN1', 'MYBPC2', 'MYBPC1', 'NTRK2', 'MYBPC3', 'PTPRD', 'LRIG3', 'LRIG2', 'MYOM1', 'NRCAM', 'ROR2', 'PALLD', 'ROBO3', 'NTRK3', 'LRRC4C', 'LRRC4B', 'CD101', 'MYPN', 'CNTN5', 'MYBPHL', 'UNC5C', 'CNTN4', 'FLT4', 'LRRN1', 'IGFN1', 'PDGFRB', 'OBSL1', 'OBSCN', 'AMIGO1', 'DSCAML1', 'ROR1', 'NCAM2', 'PXDNL', 'MDGA2…
UDPGT:370:g	21	5	10	5	7.99036	19456	1.26963e-08	6.90796e-08	499	41	47	16	['UGT2B17', 'UGT2B11', 'UGT1A4', 'UGT1A5', 'UGT2B10', 'UGT1A10', 'UGT1A3', 'UGT2B28', 'UGT1A1', 'UGT1A6', 'UGT2A1', 'UGT2B7', 'UGT1A8', 'UGT2B4', 'UGT1A7', 'UGT1A9']
Ephrin_lbd:112:k	21	5	12	5	8.41566	19456	1.26963e-08	6.90796e-08	178	35	35	3	['EPHA3', 'EPHA5', 'EPHA1']
Furin-like:149:e	21	5	11	5	9.29702	19456	1.26963e-08	6.90796e-08	149	20	19	3	['ERBB2', 'INSRR', 'ERBB3']
Myosin_head:582:R	21	5	21	4	6.73759	19456	1.26963e-08	6.90796e-08	677	99	112	14	['MYO16', 'MYH7', 'MYO7B', 'MYH6', 'MYO1D', 'MYO6', 'MYH4', 'MYO15A', 'MYO5B', 'MYO3A', 'MYO1F', 'MYO5C', 'MYH10', 'MYH9']
Guanylate_kin:165:n	21	5	9	5	6.87252	19456	1.26963e-08	6.90796e-08	182	102	102	5	['LRGUK', 'CACNB2', 'CACNB3', 'DLG2', 'DLG5']
OLF:146:n	21	5	9	5	8.54495	19456	1.26963e-08	6.90796e-08	247	32	32	3	['LPHN1', 'LPHN2', 'GLDN']
Cation_ATPase:74:r	21	5	11	5	6.91559	19456	1.26963e-08	6.90796e-08	91	101	99	8	['ATP1A1', 'ATP2B3', 'ATP2B1', 'ATP2B2', 'ATP1A2', 'ATP8B3', 'ATP8A1', 'ATP2B4']
SET:117:k	21	5	15	5	6.95998	19456	1.26963e-08	6.90796e-08	169	100	96	9	['MLL3', 'SUV420H2', 'EZH2', 'WHSC1', 'PRDM1', 'EZH1', 'NSD1', 'SMYD2', 'SMYD4']
zf-C4:61:k	25	7	17	7	6.54856	19456	1.31617e-08	7.15281e-08	70	152	152	10	['ESR2', 'RORA', 'NR3C1', 'PPARG', 'ESR1', 'ESRRG', 'NR2C2', 'RARA', 'NR1H3', 'RXRG']
FAM47:236:l	23	6	13	6	9.03234	19456	1.39254e-08	7.55902e-08	257	7	25	3	['FAM47C', 'FAM47B', 'FAM47A']
Nebulin:2:t	69	36	43	35	6.51969	19456	1.52152e-08	8.23992e-08	29	13	428	2	['NEB', 'NRAP']
Cation_ATPase_C:39:r	37	14	25	14	8.21234	19456	1.58386e-08	8.56758e-08	182	71	71	5	['ATP2C1', 'ATP2A1', 'ATP12A', 'ATP1A2', 'ATP2A2']
zf-C2H2_6:3:e	250	192	208	176	5.81863	19456	1.61879e-08	8.74634e-08	27	782	2521	101	['ZNF568', 'ZNF208', 'ZNF43', 'ZNF423', 'ZNF212', 'ZNF780A', 'ZNF195', 'ZNF404', 'ZNF253', 'ZNF117', 'ZNF418', 'ZNF791', 'ZNF799', 'ZNF317', 'ZNF555', 'ZNF700', 'ZNF546', 'ZNF429', 'ZNF560', 'ZNF283', 'ZNF71', 'ZNF334', 'ZNF93', 'ZNF211', 'ZNF184', 'ZNF85', 'PRDM1', 'ZNF675', 'ZNF676', 'ZNF530', 'ZNF562', 'ZNF141', 'ZFP62', 'ZNF721', 'ZFP90', 'ZNF649', 'ZNF157', 'ZNF449', 'ZNF816', 'ZNF492', 'ZNF…
Keratin_B2_2:32:c	32	11	32	11	6.5453	19456	1.68108e-08	9.06186e-08	45	53	195	10	['KRTAP4-6', 'KRTAP10-6', 'KRTAP9-2', 'KRTAP10-10', 'KRTAP10-9', 'KRTAP12-3', 'KRTAP4-11', 'KRTAP10-3', 'KRTAP2-3', 'KRTAP9L2']
PX:92:q	32	11	32	11	7.46613	19456	1.68108e-08	9.06186e-08	113	104	103	8	['ARHGAP32', 'NCF1', 'SNX4', 'HS1BP3', 'SNX22', 'NISCH', 'SH3PXD2A', 'SNX21']
zf-met:21:r	59	29	50	29	6.30056	19456	1.9461e-08	1.043e-07	25	281	426	27	['ZNF454', 'ZNF234', 'ZSCAN5C', 'BCL6', 'SALL3', 'ZMAT1', 'ZMAT4', 'HIC2', 'ZBTB49', 'ZNF808', 'ZNF28', 'ZNF814', 'ZNF319', 'ZNF701', 'ZSCAN5A', 'ZNF850', 'ZNF385A', 'GZF1', 'ZBTB20', 'PRDM5', 'ZNF600', 'ZBTB24', 'ZNF205', 'ZNF860', 'ZFP64', 'ZFR', 'SALL1']
Ig_3:8:p	103	63	73	62	4.47226	19456	2.25158e-08	1.20256e-07	79	936	2641	36	['MDGA1', 'IGSF10', 'ROBO2', 'FGFRL1', 'CNTN1', 'NTM', 'CNTN4', 'PDGFRL', 'NFASC', 'PSG2', 'CEACAM5', 'SDK2', 'CEACAM6', 'DSCAM', 'VCAM1', 'NCAM2', 'FCRL1', 'LRIG3', 'PXDNL', 'HMCN1', 'PSG1', 'SDK1', 'NRCAM', 'KIRREL3', 'CADM3', 'IGDCC4', 'CHL1', 'OBSL1', 'PRTG', 'BOC', 'CNTN5', 'IGSF9B', 'HSPG2', 'BCAM', 'MALT1', 'JAM2']
VWA:84:a	30	10	22	10	6.10532	19456	2.38593e-08	1.27286e-07	175	144	248	11	['COL6A3', 'COL6A2', 'COL21A1', 'FLJ35880', 'ITGAX', 'COL6A1', 'ITGAD', 'COL22A1', 'ITGA1', 'COL6A6', 'COL12A1']
7tm_4:74:i	150	103	132	99	7.5549	19456	2.61338e-08	1.39101e-07	280	469	454	77	['OR7E24', 'OR6X1', 'OR2C3', 'OR4C15', 'OR8B2', 'OR10H5', 'OR1E2', 'OR51F1', 'OR6C70', 'OR5K3', 'OR2B11', 'OR2G6', 'OR8H2', 'OR51B5', 'OR8K1', 'OR51I1', 'OR2T4', 'OR2Y1', 'OR8B12', 'OR7D4', 'OR2A7', 'OR5P2', 'OR5AS1', 'OR52K2', 'OR2A42', 'OR5M3', 'OR7C2', 'OR13F1', 'OR4A47', 'OR1J4', 'OR52N5', 'OR4A5', 'OR9G4', 'OR4A16', 'OR5B21', 'OR14C36', 'OR2K2', 'OR1A1', 'OR5D16', 'OR13C2', 'OR10A4', 'OR52N2…
Laminin_EGF:33:r	67	35	63	35	6.73894	19456	2.71587e-08	1.44226e-07	49	68	357	20	['LAMA5', 'LAMA2', 'CELSR2', 'HSPG2', 'LAMB1', 'LAMA1', 'LAMC3', 'LAMB4', 'NTN5', 'MEGF11', 'LAMB2', 'EGFL4', 'LAMC1', 'NTN1', 'LAMB3', 'PEAR1', 'LAMC2', 'USH2A', 'NTN4', 'LAMA3']
CUB:3:g	52	24	33	24	6.31391	19456	2.76492e-08	1.46664e-07	110	128	372	13	['CSMD3', 'TLL2', 'CSMD2', 'CUBN', 'OVCH1', 'SEZ6', 'GPR126', 'NETO1', 'NRP1', 'TLL1', 'SEZ6L', 'ATRN', 'DMBT1']
CUB:36:g	76	42	45	42	6.8614	19456	2.88553e-08	1.52713e-07	110	128	372	16	['CSMD3', 'NRP2', 'SEZ6', 'ATRN', 'TLL1', 'CSMD2', 'C1S', 'CUBN', 'CDCP2', 'KREMEN1', 'DCBLD2', 'TNFAIP6', 'CUZD1', 'TMPRSS15', 'MASP2', 'TLL2']
Pkinase_Tyr:147:D	68	36	54	36	4.93631	19456	2.8989e-08	1.53246e-07	260	1213	1264	21	['EPHB1', 'TYK2', 'RET', 'NTRK3', 'BRAF', 'MAP3K7', 'SYK', 'NPR1', 'ABL1', 'MUSK', 'RIPK1', 'CSK', 'EPHB4', 'ALK', 'TNK2', 'EPHA6', 'ERBB4', 'EPHA4', 'HCK', 'KSR2', 'PTK2B']
p450:387:R	38	15	33	15	7.5932	19456	2.9985e-08	1.58332e-07	463	102	112	23	['CYP26A1', 'CYP4B1', 'CYP2U1', 'CYP19A1', 'CYP27A1', 'CYP3A4', 'CYP27B1', 'CYP4F11', 'CYP3A7', 'CYP4A11', 'PTGIS', 'CYP4F3', 'CYP2J2', 'CYP11A1', 'CYP4V2', 'CYP39A1', 'CYP2A6', 'CYP4A22', 'CYP27C1', 'CYP8B1', 'CYP1A2', 'CYP11B1', 'CYP4F2']
SH3_2:48:P	28	9	22	9	4.64257	19456	3.27616e-08	1.71823e-07	55	488	638	15	['ITSN2', 'MYO15A', 'SH3GL3', 'SH3BP4', 'MPP1', 'DNMBP', 'RIMBP2', 'SORBS1', 'MPP6', 'MIA2', 'TJP2', 'DLG1', 'SH3RF2', 'MIA3', 'DOCK4']
RhoGAP:23:R	28	9	21	9	6.47617	19456	3.27616e-08	1.71823e-07	152	178	179	16	['ARHGAP11B', 'STARD13', 'ARHGAP19', 'ARHGAP30', 'GMIP', 'ARHGAP35', 'ARHGAP31', 'ARAP3', 'TAGAP', 'HMHA1', 'CHN2', 'ARHGAP5', 'ARHGAP27', 'SYDE1', 'SYDE2', 'OPHN1']
Kinesin:187:k	28	9	16	9	7.23206	19456	3.27616e-08	1.71823e-07	333	104	106	8	['KIF13A', 'KIF16B', 'STARD9', 'KIF6', 'KIF3B', 'KIF21A', 'KIF9', 'KIF20A']
Trypsin:4:g	28	9	26	9	6.15263	19456	3.27616e-08	1.71823e-07	221	210	224	21	['PRSS55', 'PRSS36', 'KLK3', 'PRSS38', 'KLK15', 'F7', 'CTRB1', 'CTRB2', 'ELANE', 'GZMB', 'F10', 'F9', 'GZMA', 'KLK5', 'AZU1', 'TMPRSS9', 'CORIN', 'TMPRSS11B', 'GZMM', 'CFI', 'F11']
Ras:120:r	41	17	39	17	6.37063	19456	3.28666e-08	1.71986e-07	162	274	282	27	['RND3', 'AGAP1', 'RAB5C', 'NKIRAS2', 'RIT2', 'RAB28', 'RASD2', 'DIRAS1', 'RALB', 'RASL11A', 'RAB21', 'IFT27', 'RAB3C', 'RAB15', 'RHOBTB2', 'RAP1A', 'RRAD', 'AGAP2', 'ARHGAP35', 'RSG1', 'RAB3D', 'RAB11B', 'RAB10', 'RAB2A', 'RERGL', 'AGAP3', 'RAB2B']
RhoGAP:12:e	41	17	19	17	7.02637	19456	3.28666e-08	1.71986e-07	152	178	179	8	['ARHGAP11A', 'ABR', 'ARHGAP36', 'ARHGAP5', 'STARD8', 'ARHGAP22', 'ARHGAP33', 'ARAP1']
CUB:105:G	57	28	37	28	6.44636	19456	3.39665e-08	1.77542e-07	110	128	372	16	['CUZD1', 'TMPRSS15', 'CSMD3', 'CDCP2', 'MASP1', 'PDGFC', 'CSMD2', 'TLL1', 'MASP2', 'CUBN', 'OVCH1', 'TLL2', 'ST14', 'LRP3', 'DMBT1', 'C1S']
Pkinase:262:p	85	49	56	49	5.22551	19456	3.51638e-08	1.83183e-07	264	1221	1293	43	['MARK2', 'SLK', 'ROCK2', 'SGK1', 'TRIB2', 'HIPK2', 'HIPK3', 'MYLK2', 'CAMK2G', 'RPS6KA6', 'PIM1', 'GRK4', 'MAP2K7', 'CAMKK1', 'SNRK', 'MAPK13', 'STK38L', 'CDKL3', 'HUNK', 'PRKD2', 'DCLK3', 'LATS2', 'ENSG00000168038', 'RPS6KA2', 'TTK', 'ICK', 'CAMK2B', 'STK10', 'STK36', 'MAPK12', 'PAK2', 'STK32A', 'CAMK4', 'MAPK11', 'PRPF4B', 'RPS6KB1', 'CDKL5', 'DMPK', 'MAP3K4', 'RPS6KC1', 'CDK10', 'ERN1', 'CDC4…
E1-E2_ATPase:93:k	33	12	27	12	6.98757	19456	3.70854e-08	1.92977e-07	221	117	148	14	['ATP8B2', 'ATP1A4', 'ATP13A3', 'ATP1A3', 'ATP2C1', 'ATP12A', 'ATP10D', 'ATP13A1', 'ATP8B4', 'ATP11C', 'ATP10A', 'ATP4A', 'ATP1A2', 'ATP9A']
Cadherin_C_2:54:p	26	8	19	8	7.64362	19456	4.30497e-08	2.22767e-07	85	86	74	8	['PCDHB1', 'PCDHGB4', 'PCDHGB3', 'PCDHB7', 'PCDHGA5', 'PCDHGB2', 'PCDHGA1', 'PCDHB11']
Myosin_head:350:r	26	8	24	8	7.04571	19456	4.30497e-08	2.22767e-07	677	99	112	15	['MYO9A', 'MYH2', 'MYO3B', 'MYO5B', 'MYO7B', 'MYH6', 'MYH1', 'MYO3A', 'MYO5C', 'MYH15', 'MYH8', 'MYO1A', 'MYO1B', 'MYO1D', 'MYH4']
Ion_trans:58:g	109	69	67	68	6.34527	19456	4.66407e-08	2.40546e-07	245	359	763	29	['CACNA1C', 'SCN1A', 'SCN8A', 'KCNC2', 'KCNH5', 'CACNA1I', 'CACNA1F', 'SCN10A', 'CACNA1E', 'KCNQ4', 'TRPC4', 'KCNA10', 'SCN2A', 'CACNA1A', 'CACNA1S', 'CACNA1H', 'KCNV1', 'HCN1', 'KCNMA1', 'KCNC3', 'KCNA2', 'SCN11A', 'NALCN', 'KCNS3', 'SCN9A', 'TRPC3', 'SCN7A', 'SCN5A', 'SCN3A']
Filamin:80:p	36	14	23	14	6.07463	19456	4.74653e-08	2.44528e-07	103	28	304	4	['FLNC', 'FLNB', 'TRIM71', 'FLNA']
EGF_CA:9:t	129	86	91	84	6.39733	19456	4.80047e-08	2.46978e-07	42	189	871	37	['FBLN5', 'FBLN1', 'LTBP4', 'MEGF6', 'FBN1', 'NOTCH2NL', 'CRELD1', 'NELL2', 'CRELD2', 'NID1', 'NOTCH1', 'LRP2', 'EFEMP2', 'FBN3', 'FBN2', 'LTBP2', 'NOTCH4', 'MATN2', 'FBLN2', 'EGF', 'FBLN7', 'NOTCH2', 'CD93', 'UMOD', 'EMR1', 'JAG2', 'PROS1', 'EMR2', 'CUBN', 'FAT4', 'LTBP1', 'THBS2', 'LRP1', 'SCUBE3', 'NID2', 'NOTCH3', 'LDLR']
Cadherin:20:a	230	176	178	168	6.58555	19456	4.8047e-08	2.46978e-07	93	227	1363	62	['CDH2', 'PCDHGB6', 'CDH24', 'PCDHA9', 'CDH8', 'PCDHG', 'PCDHGB3', 'PCDHB11', 'PCDHGA6', 'CDH5', 'PCDHGB1', 'PCDHB1', 'PCDHA10', 'PCDHGB4', 'FAT4', 'PCDHA1', 'PCDHA5', 'PCDHB12', 'PCDHGB7', 'CDH19', 'PCDHB10', 'FAT', 'PCDHA3', 'PCDHGA1', 'PCDHA4', 'CELSR1', 'PCDHA12', 'PCDHA8', 'PCDHGA5', 'PCDHA7', 'CDH20', 'PCDHA6', 'PCDH17', 'FAT3', 'PCDHGA8', 'PCDHGA3', 'FAT2', 'PCDHA13', 'CDHR1', 'PCDHA11', '…
bZIP_1:14:R	24	7	20	7	7.16774	19456	5.32591e-08	2.72565e-07	64	96	95	9	['CREB5', 'FOSB', 'CREB3L2', 'BATF', 'ATF6', 'JUN', 'CREB1', 'BATF3', 'ATF2']
Cadherin_C:87:a	24	7	16	7	8.6932	19456	5.32591e-08	2.72565e-07	132	34	33	7	['CDH11', 'CDH6', 'CDH24', 'CDH5', 'CDH18', 'CDH15', 'CDH7']
Guanylate_cyc:103:r	24	7	23	7	8.21403	19456	5.32591e-08	2.72565e-07	183	32	46	10	['NPR1', 'ADCY2', 'ADCY1', 'ADCY7', 'ADCY3', 'GUCY1A3', 'GUCY2F', 'ADCY8', 'ADCY4', 'ADCY9']
Kazal_2:35:h	24	7	16	7	6.11554	19456	5.32591e-08	2.72565e-07	42	92	197	6	['SPINK5', 'SPOCK2', 'C6', 'HTRA4', 'FST', 'TMEFF2']
P53:17:l	42	18	11	18	9.50055	19456	5.46792e-08	2.79525e-07	196	33	33	1	['TP53']
Filament:179:e	31	11	30	11	7.4344	19456	5.5448e-08	2.81291e-07	312	104	102	21	['KRT16', 'SYNM', 'KRT4', 'KRT78', 'KRT8', 'KRT7', 'KRT83', 'KRT6B', 'NEFM', 'KRT77', 'KRT35', 'KRT71', 'KRT73', 'KRT32', 'KRT17', 'KRT1', 'KRT28', 'KRT24', 'KRT36', 'KRT6C', 'KRT13']
Y_phosphatase:14:d	31	11	14	11	6.56767	19456	5.5448e-08	2.81291e-07	235	152	186	5	['PTPN11', 'PTPRK', 'PTPRU', 'PTPRB', 'PTPRZ1']
cEGF:16:G	31	11	23	11	6.06791	19456	5.5448e-08	2.81291e-07	24	136	263	9	['EMR1', 'EFEMP2', 'MATN2', 'LRP4', 'FBN1', 'FBLN2', 'FBN2', 'SCUBE3', 'LTBP3']
ANF_receptor:118:g	31	11	23	11	7.59903	19456	5.5448e-08	2.81291e-07	352	92	91	8	['GRID1', 'GRIA4', 'GRM6', 'GRM8', 'TAS1R2', 'CASR', 'GRM7', 'GPRC6A']
RhoGEF:14:r	31	11	20	11	6.42735	19456	5.5448e-08	2.81291e-07	181	200	205	11	['AKAP13', 'MCF2', 'VAV3', 'PREX2', 'ARHGEF40', 'TRIO', 'OBSCN', 'PREX1', 'PLEKHG4', 'DNMBP', 'PLEKHG4B']
ANF_receptor:123:a	31	11	20	11	7.59903	19456	5.5448e-08	2.81291e-07	352	92	91	9	['GUCY2D', 'GRIK3', 'GRM8', 'GRIK2', 'GRM6', 'TAS1R1', 'GRM7', 'GRID1', 'GRM5']
zf-C4:51:k	31	11	19	11	6.8589	19456	5.5448e-08	2.81291e-07	70	152	152	8	['NR1I3', 'ESR2', 'NR3C1', 'PPARG', 'NR4A3', 'PGR', 'RXRA', 'AR']
EGF_CA:4:E	132	89	87	83	6.43049	19456	6.03723e-08	3.05939e-07	42	189	871	30	['LTBP1', 'FBN3', 'FBLN2', 'LTBP2', 'PROS1', 'FBN2', 'LTBP3', 'NOTCH2', 'LRP1B', 'FBLN1', 'NOTCH3', 'FBLN5', 'EGFL6', 'LTBP4', 'FBLN7', 'FBN1', 'NOTCH1', 'SCUBE1', 'EMR1', 'THBS3', 'CUBN', 'HMCN1', 'MEGF6', 'THBS4', 'CD93', 'SCUBE3', 'ELTD1', 'NOTCH2NL', 'MATN3', 'VWCE']
Neur_chan_LBD:76:r	22	6	19	6	7.10427	19456	6.04695e-08	3.06098e-07	216	88	91	13	['GABRG1', 'HTR3B', 'GLRA4', 'CHRNA6', 'CHRNE', 'GABRA5', 'GABRB3', 'CHRNG', 'GABRB2', 'GABRA2', 'GABRA1', 'GABRG2', 'CHRNA5']
Pkinase:184:G	99	61	82	59	5.44548	19456	6.39895e-08	3.23564e-07	264	1221	1293	52	['CAMK4', 'RPS6KA6', 'CHEK1', 'CSNK1A1', 'MARK1', 'ACVR2A', 'MAP4K3', 'TAOK3', 'CDK8', 'TRIB2', 'DAPK1', 'GRK7', 'PRKCB', 'IRAK3', 'STRADA', 'DCLK1', 'MAPK11', 'PAK3', 'DYRK1A', 'ACVR1B', 'CAMK2B', 'CAMK1D', 'ULK1', 'SRPK2', 'CDK15', 'PRKD3', 'PAK4', 'RPS6KA2', 'MAP3K3', 'TAOK1', 'PRKG2', 'STK32B', 'PRKCD', 'SLK', 'RPS6KA3', 'CAMK1G', 'HIPK3', 'CLK2', 'PAK7', 'RIPK3', 'PSKH1', 'HIPK4', 'SBK1', 'P…
Neur_chan_memb:51:S	29	10	23	10	7.45602	19456	8.11699e-08	4.07778e-07	238	87	94	13	['CHRNA6', 'CHRNE', 'GABRB1', 'GABRB2', 'GLRB', 'HTR3B', 'GABRP', 'GABRB3', 'GABRG2', 'GLRA3', 'CHRNB3', 'CHRNB4', 'GABRA3']
p450:408:G	29	10	29	10	7.20326	19456	8.11699e-08	4.07778e-07	463	102	112	13	['CYP4A22', 'CYP2C8', 'CYP2C18', 'CYP4X1', 'CYP2A7', 'CYP2A13', 'CYP3A7', 'CYP26B1', 'CYP7A1', 'CYP2C19', 'CYP2C9', 'CYP39A1', 'PTGIS']
Sugar_tr:384:R	29	10	24	9	7.21619	19456	8.11699e-08	4.07778e-07	452	106	111	12	['SLC22A10', 'SLC22A16', 'SLC2A1', 'SLC2A3', 'SLC2A14', 'SLC2A6', 'SLC2A5', 'SLC22A17', 'SLC22A6', 'SLC22A13', 'SLC2A4', 'SVOPL']
VWC:39:s	29	10	19	10	7.25572	19456	8.11699e-08	4.07778e-07	57	51	108	7	['NELL1', 'NELL2', 'FRAS1', 'CHRDL2', 'BMPER', 'COL2A1', 'VWC2']
Ig_2:57:g	64	34	44	33	4.46613	19456	8.77742e-08	4.40481e-07	79	811	1648	26	['FCRL5', 'PSG1', 'SIGLEC12', 'PSG3', 'FCRL3', 'CD22', 'IGSF1', 'CD86', 'LILRB2', 'LAIR1', 'FCRLA', 'AGER', 'PSG5', 'FCRL6', 'FCRL1', 'SIGLEC10', 'GP6', 'FCRL2', 'LILRA5', 'VSTM1', 'CD48', 'PSG9', 'LILRA2', 'LILRB4', 'IL1RAPL2', 'SIGLEC14']
Pkinase:5:e	72	40	57	40	4.98605	19456	8.80692e-08	4.41485e-07	264	1221	1293	36	['ENSG00000168038', 'STK32C', 'SBK1', 'AURKC', 'CAMK1G', 'PLK1', 'STK32B', 'MAP3K1', 'PRKACG', 'MYO3A', 'TBK1', 'EIF2AK1', 'ADRBK1', 'SGK1', 'TAOK3', 'CDK20', 'MAP2K5', 'CSNK1A1', 'NEK2', 'DCLK2', 'CDC7', 'GRK5', 'STK32A', 'RPS6KB1', 'CLK2', 'CSNK1A1L', 'MAPK7', 'ADRBK2', 'MGC42105', 'NUAK1', 'CSNK2A2', 'HIPK3', 'PRKD2', 'MAP2K3', 'PIK3R4', 'PRKD3']
SH3_9:28:e	49	23	37	23	5.64581	19456	9.5302e-08	4.76715e-07	49	409	557	10	['BAIAP2', 'SORBS2', 'NCK1', 'NOSTRIN', 'ABI3', 'ASAP2', 'MYO1F', 'SH3RF1', 'FNBP1', 'PPP1R13L']
Spectrin:79:e	60	31	42	30	5.63956	19456	9.76818e-08	4.88094e-07	105	94	685	12	['SPTBN2', 'SPTBN4', 'SPTAN1', 'SPTBN1', 'MCF2L', 'DST', 'SPTBN5', 'ACTN1', 'SPTB', 'MACF1', 'UTRN', 'SYNE2']
Sushi:47:g	116	76	82	74	6.3524	19456	1.0189e-07	5.08574e-07	56	146	808	24	['CR1', 'CSMD2', 'CFH', 'CFHR5', 'SELL', 'SRPX2', 'PAPPA', 'C4BPA', 'CR2', 'CSMD3', 'F13B', 'C6', 'SELE', 'CFHR2', 'SUSD3', 'SUSD4', 'TPO', 'C2', 'SUSD1', 'C7', 'MASP1', 'CR1L', 'CFHR1', 'APOH']
P53:87:r	61	32	15	32	10.039	19456	1.05806e-07	5.26993e-07	196	33	33	1	['TP53']
Laminin_EGF:18:g	61	32	57	32	6.60359	19456	1.05806e-07	5.26993e-07	49	68	357	16	['USH2A', 'LAMA1', 'LAMA3', 'LAMB4', 'LAMB2', 'CELSR1', 'LAMA2', 'MEGF11', 'AGRN', 'MEGF10', 'MEGF8', 'LAMB1', 'LAMA5', 'LAMC1', 'LAMC3', 'LAMB3']
Ig_2:23:a	56	28	43	28	4.27348	19456	1.07071e-07	5.3272e-07	79	811	1648	24	['PSG1', 'FCGR3B', 'FCER1A', 'PSG9', 'LILRB4', 'FCRL5', 'FCGR2B', 'FCRL2', 'HSPG2', 'LILRA1', 'PSG5', 'FCGR1A', 'FCRL4', 'GP6', 'FCRL6', 'CEACAM1', 'PSG2', 'IGSF1', 'IL18RAP', 'CEACAM5', 'PSG3', 'CNTN5', 'SEMA7A', 'VSIG10L']
fn3:36:e	183	135	143	130	5.10943	19456	1.0783e-07	5.35923e-07	85	419	3017	46	['IGDCC4', 'DCC', 'NEO1', 'FN1', 'PTPRB', 'TTN', 'IGSF9', 'IL31RA', 'NPHS1', 'TNR', 'ROBO1', 'IL6ST', 'TNXB', 'FNDC3B', 'LIFR', 'IGSF22', 'IL12RB2', 'PTPRH', 'FNDC1', 'AXL', 'PTPRJ', 'EPHB3', 'TNC', 'COL12A1', 'MYBPH', 'MYOM1', 'TNN', 'USH2A', 'LRFN3', 'CNTN6', 'EPHA4', 'CNTN2', 'MYBPC1', 'CHL1', 'PTPRF', 'SDK2', 'NFASC', 'COL7A1', 'L1CAM', 'EPHA5', 'LRRN4', 'CNTN3', 'LRFN1', 'MYOM3', 'LRFN4', 'C…
P53:78:v	69	38	18	38	10.2168	19456	1.08256e-07	5.37466e-07	196	33	33	1	['TP53']
Pkinase:24:g	93	57	56	57	5.35528	19456	1.0987e-07	5.44897e-07	264	1221	1293	44	['MKNK2', 'TGFBR1', 'ADRBK2', 'IRAK2', 'PIM2', 'GRK4', 'DYRK3', 'CSNK1A1L', 'RPS6KA2', 'PRKG2', 'CDK10', 'CHEK1', 'MAPK10', 'MAP3K5', 'SCYL2', 'SGK1', 'ENSG00000168038', 'RNASEL', 'CDK15', 'MAP3K4', 'PSKH2', 'STK24', 'CDK17', 'CAMKV', 'PAK7', 'PRKCB', 'STRADA', 'PIK3R4', 'ICK', 'MAP3K15', 'STK32A', 'PRKG1', 'PNCK', 'STK38', 'EIF2AK3', 'DCLK2', 'PKMYT1', 'TAOK3', 'CDK14', 'HIPK3', 'ROCK2', 'CLK3',…
Guanylate_kin:42:r	27	9	12	9	7.23509	19456	1.156e-07	5.71405e-07	182	102	102	7	['DLG2', 'CACNB3', 'DLG1', 'MAGI1', 'MPP7', 'MPP5', 'CACNB4']
SPRY:81:s	32	12	25	12	6.77759	19456	1.15706e-07	5.71405e-07	120	148	166	17	['TRIM14', 'TRIM4', 'RYR2', 'TRIM11', 'RNF123', 'MID1', 'BTN3A3', 'TRIM9', 'HNRPU', 'TRIM60', 'TRIM35', 'RFPL1', 'BTNL3', 'RFPL2', 'TRIM58', 'SPSB4', 'HNRNPU']
Filament:190:e	32	12	26	12	7.4802	19456	1.15706e-07	5.71405e-07	312	104	102	18	['KRT14', 'KRT6B', 'KRT6C', 'KRT74', 'KRT9', 'KRT80', 'KRT86', 'KRT28', 'KRT2', 'KRT6A', 'KRT31', 'NEFM', 'KRT25', 'GFAP', 'KRT1', 'KRT32', 'KRT17', 'KRT79']
Neur_chan_LBD:134:P	27	9	27	8	7.39972	19456	1.156e-07	5.71405e-07	216	88	91	17	['CHRNB4', 'GLRA3', 'CHRNA4', 'GABRA1', 'CHRND', 'GABRA4', 'GABRG1', 'GABRB1', 'CHRNA1', 'CHRNA9', 'GLRB', 'GABRA3', 'CHRNB3', 'HTR3B', 'CHRNB1', 'HTR3A', 'CHRNA5']
PH:44:p	54	27	45	27	5.87961	19456	1.25127e-07	6.16622e-07	105	511	522	31	['NGEF', 'ARHGAP22', 'ADAP2', 'ADRBK1', 'GRB14', 'PLEK', 'FGD4', 'RASA3', 'SKAP2', 'PLEK2', 'SH3BP2', 'AKT1', 'DOCK11', 'OSBPL9', 'AFAP1L2', 'PLEKHH1', 'CIT', 'PRKD3', 'TRIO', 'CYTH4', 'ADAP1', 'PLEKHA1', 'ARHGAP10', 'AKT3', 'OSBPL5', 'TBC1D2', 'STAP1', 'FARP1', 'RASGRF1', 'CYTH1', 'ARHGEF16']
Ion_trans:111:s	107	69	73	67	6.31856	19456	1.40682e-07	6.89624e-07	245	359	763	36	['KCNH1', 'TRPM1', 'ITPR1', 'KCNF1', 'HCN1', 'KCND3', 'TRPC4', 'SCN11A', 'CACNA1C', 'KCNC2', 'SCN5A', 'CACNA1D', 'KCNG2', 'CACNA1E', 'SCN2A', 'KCNA3', 'CACNA1A', 'KCNH2', 'KCNA6', 'KCND2', 'KCNQ5', 'SCN7A', 'SCN10A', 'KCNA10', 'KCNH3', 'SCN4A', 'KCNQ1', 'SCN3A', 'KCNC3', 'CATSPER3', 'KCNC4', 'CACNA1B', 'KCNA1', 'KCNS1', 'TRPM7', 'CACNA1G']
Sushi:32:G	126	85	90	82	6.4717	19456	1.42327e-07	6.96953e-07	56	146	808	26	['CFHR4', 'CSMD3', 'SUSD1', 'SELE', 'GABBR1', 'CFHR3', 'SUSD2', 'CR1', 'SRPX', 'CSMD2', 'CFHR1', 'CFHR2', 'CFH', 'CR2', 'C4BPA', 'APOH', 'SEZ6L2', 'SELL', 'PAPPA2', 'CFB', 'SUSD4', 'F13B', 'SEZ6L', 'CFHR5', 'MASP1', 'C7']
P53:51:v	41	18	12	18	9.46579	19456	1.44806e-07	7.08347e-07	196	33	33	1	['TP53']
SRCR:73:e	38	16	27	16	6.32374	19456	1.47548e-07	7.21004e-07	100	56	270	8	['DMBT1', 'PRSS12', 'LOXL2', 'CD163', 'MARCO', 'CD6', 'MSR1', 'CD163L1']
Plectin:29:r	44	20	10	20	6.63478	19456	1.50795e-07	7.36094e-07	41	20	252	3	['PLEC', 'DSP', 'DST']
FAM47:211:k	25	8	17	8	9.15263	19456	1.58697e-07	7.71429e-07	257	7	25	3	['FAM47C', 'FAM47A', 'FAM47B']
ANF_receptor:254:k	25	8	16	8	7.28869	19456	1.58697e-07	7.71429e-07	352	92	91	10	['GPRC6A', 'GRIK2', 'GRID2', 'GRM7', 'GRM2', 'GRIA2', 'TAS1R3', 'GRIK3', 'TAS1R2', 'GRM8']
Serpin:166:G	25	8	22	8	7.70902	19456	1.58697e-07	7.71429e-07	370	63	68	12	['SERPINB10', 'SERPINA10', 'SERPINB5', 'SERPINB9', 'SERPINF1', 'SERPINB1', 'SERPINA6', 'SERPINB2', 'SERPINB7', 'SERPINB6', 'SERPINB3', 'SERPIND1']
Kelch_1:12:g	75	43	65	43	6.71256	19456	1.66042e-07	8.05452e-07	46	122	407	32	['KLHL31', 'KLHDC10', 'KLHL4', 'ATRNL1', 'KLHL11', 'KLHL13', 'LZTR1', 'KLHL26', 'KLHL14', 'KLHDC8A', 'KLHL9', 'CCIN', 'KLHL35', 'KLHL1', 'KEAP1', 'KLHL3', 'KBTBD11', 'ENC1', 'MKLN1', 'KLHL18', 'HCFC2', 'KLHL33', 'KLHL24', 'KLHL20', 'KLHL36', 'KLHDC5', 'KLHL32', 'KLHL17', 'KLHL10', 'IPP', 'KLHDC7A', 'KLHL25']
Laminin_G_2:79:a	47	22	30	22	6.6738	19456	1.76786e-07	8.54896e-07	126	111	262	16	['CRB1', 'CNTNAP4', 'NRXN1', 'CNTNAP2', 'CSPG4', 'CNTNAP5', 'NELL2', 'FAT3', 'NRXN2', 'EGFLAM', 'CNTNAP1', 'LAMA3', 'FAT2', 'CNTNAP3', 'GAS6', 'SLIT1']
Trypsin:194:G	47	22	40	22	6.89986	19456	1.76786e-07	8.54896e-07	221	210	224	26	['TMPRSS6', 'TMPRSS15', 'KLK6', 'CTSG', 'PRSS37', 'TMPRSS2', 'PRSS3', 'PRSS1', 'PRSS38', 'F11', 'HGF', 'HABP2', 'ELANE', 'TMPRSS11D', 'GZMK', 'KLK3', 'TMPRSS3', 'CTRB2', 'PRSS27', 'PRSS45', 'CTRB1', 'F2', 'PRSS42', 'KLK5', 'HGFAC', 'PRSS58']
p450:6:p	30	11	22	11	7.25217	19456	1.77333e-07	8.56649e-07	463	102	112	13	['CYP4F2', 'CYP4F3', 'CYP4B1', 'CYP3A43', 'CYP2W1', 'CYP8B1', 'CYP4A22', 'CYP1A1', 'CYP2C19', 'PTGIS', 'CYP2A7', 'CYP4X1', 'CYP2E1']
Mito_carr:70:p	45	21	32	21	6.61658	19456	2.05805e-07	9.91103e-07	97	100	261	19	['SLC25A39', 'SLC25A37', 'SLC25A30', 'SLC25A33', 'SLC25A42', 'UCP2', 'SLC25A38', 'SLC25A11', 'SLC25A23', 'SLC25A3', 'MTCH2', 'SLC25A10', 'SLC25A32', 'SLC25A21', 'SLC25A25', 'SLC25A48', 'MTCH1', 'SLC25A2', 'SLC25A29']
Calx-beta:24:E	23	7	20	7	6.79355	19456	2.0712e-07	9.94349e-07	100	26	118	6	['ITGB4', 'GPR98', 'SLC8A3', 'FREM2', 'FREM1', 'SLC8A1']
Cation_ATPase_C:71:l	23	7	22	7	7.52644	19456	2.0712e-07	9.94349e-07	182	71	71	4	['ATP2B1', 'ATP13A3', 'ATP2C1', 'ATP4A']
Pkinase_Tyr:98:k	23	7	12	7	3.37241	19456	2.0712e-07	9.94349e-07	260	1213	1264	9	['LYN', 'ABL2', 'TEK', 'PDGFRB', 'KDR', 'INSR', 'CSK', 'FGFR1', 'ROS1']
7tm_4:77:l	103	66	95	65	7.01258	19456	2.0825e-07	9.98741e-07	280	469	454	49	['OR4X1', 'OR4N4', 'OR14C36', 'OR11G2', 'OR13F1', 'OR9Q2', 'OR51B6', 'OR4S1', 'OR4S2', 'OR4A47', 'OR1J1', 'OR4C13', 'OR51S1', 'OR4P4', 'OR5M11', 'OR2L13', 'OR5AC2', 'OR6P1', 'OR6C4', 'OR13J1', 'OR52J3', 'OR6K6', 'OR2T1', 'OR4A16', 'OR10A7', 'OR8K1', 'OR4C15', 'OR51M1', 'OR4K2', 'OR52L1', 'OR10A4', 'OR6C65', 'OR51L1', 'OR5A1', 'OR10A2', 'OR2T2', 'OR8H3', 'OR7D2', 'OR7E24', 'OR52K1', 'OR6C1', 'OR2D…
PH:81:r	52	26	41	25	5.82516	19456	2.17248e-07	1.03868e-06	105	511	522	27	['PLEKHG3', 'FGD4', 'ARHGEF7', 'SBF1', 'DNM1', 'KALRN', 'FGD1', 'TIAM1', 'PLEKHH2', 'ADAP1', 'KIF1A', 'GAB3', 'ASAP3', 'ARAP2', 'FAM109A', 'APPL1', 'GAB2', 'PLEKHA1', 'ARHGAP26', 'GAB4', 'PRKD1', 'CNKSR1', 'FGD3', 'ADAP2', 'GAB1', 'OSBPL5', 'MYO10']
CUB:2:g	52	26	32	26	6.31391	19456	2.17248e-07	1.03868e-06	110	128	372	13	['TLL1', 'CSMD3', 'CUBN', 'TLL2', 'SCUBE1', 'CSMD2', 'SEZ6', 'SEZ6L', 'TMPRSS15', 'PCOLCE', 'NRP2', 'GPR126', 'CDCP2']
Laminin_EGF:44:d	33	13	32	13	5.71724	19456	2.21192e-07	1.05429e-06	49	68	357	13	['MEGF8', 'NTN4', 'LAMA3', 'NTN5', 'USH2A', 'LAMA2', 'HSPG2', 'LAMA1', 'LAMC1', 'MEGF6', 'LAMB2', 'PEAR1', 'LAMB1']
Bromodomain:54:l	33	13	19	13	6.42224	19456	2.21192e-07	1.05429e-06	84	143	219	7	['BRD3', 'TAF1L', 'TAF1', 'PBRM1', 'ZMYND11', 'AL589988.1', 'CREBBP']
P53:98:a	33	13	11	13	9.15263	19456	2.21192e-07	1.05429e-06	196	33	33	1	['TP53']
P53:121:q	105	68	30	68	10.8225	19456	2.28712e-07	1.08849e-06	196	33	33	1	['TP53']
Homeobox:56:k	64	35	59	35	6.43838	19456	2.33416e-07	1.10914e-06	57	381	420	33	['ARGFX', 'BARX2', 'BARHL1', 'PHOX2B', 'BARHL2', 'CUX1', 'SIX6', 'ZFHX3', 'HOXB3', 'PROP1', 'CUX2', 'HOPX', 'PAX7', 'SHOX', 'TLX3', 'DBX2', 'PAX4', 'POU1F1', 'DRGX', 'NKX3-1', 'HDX', 'OTX2', 'DPRX', 'NKX6-2', 'ZFHX4', 'ALX1', 'HOXA1', 'SIX3', 'HOXD9', 'HOXB2', 'ISX', 'BSX', 'HLX']
Cadherin_2:59:e	39	17	32	17	7.44935	19456	2.40263e-07	1.14051e-06	83	178	127	19	['PCDHGC5', 'PCDHGA6', 'PCDHGA1', 'PCDH8', 'PCDHGA9', 'PCDH18', 'PCDHB11', 'PCDHA2', 'PCDHGA8', 'PCDHB4', 'PCDHGA7', 'PCDHB6', 'PCDH10', 'PCDHA5', 'PCDHB12', 'PCDH11X', 'PCDHB3', 'PCDHGB7', 'PCDHB5']
SH3_9:7:p	36	15	21	15	5.20102	19456	2.41347e-07	1.14449e-06	49	409	557	14	['SH3RF3', 'SORBS2', 'NEB', 'FCHSD1', 'BZRAP1', 'SORBS3', 'UBASH3B', 'BAIAP2', 'RIMBP2', 'NCK2', 'PEX13', 'ITSN1', 'PPP1R13L', 'SH3RF1']
Calponin:5:M	21	6	12	6	8.90109	19456	2.5146e-07	1.18042e-06	25	11	25	2	['CNN2', 'CNN3']
UDPGT:363:m	21	6	2	5	7.99036	19456	2.5146e-07	1.18042e-06	499	41	47	10	['UGT1A1', 'UGT1A3', 'UGT1A8', 'UGT1A10', 'UGT1A6', 'UGT1A7', 'UGT1A5', 'UGT1A4', 'UGT2B11', 'UGT1A9']
SPRY:1:k	21	6	20	6	6.16991	19456	2.5146e-07	1.18042e-06	120	148	166	13	['TRIML2', 'RYR2', 'RYR1', 'RFPL2', 'TRIM60', 'TRIM16', 'TRIM11', 'TRIM68', 'TRIML1', 'RFPL1', 'BTN3A1', 'TRIM25', 'TRIM14']
Glyco_transf_29:103:v	21	6	17	6	7.81703	19456	2.5146e-07	1.18042e-06	271	52	53	8	['ST3GAL3', 'ST6GAL1', 'ST6GAL2', 'ST6GALNAC4', 'ST6GALNAC3', 'ST6GALNAC6', 'ST3GAL4', 'ST3GAL6']
RPEL:4:r	21	6	15	6	7.81703	19456	2.5146e-07	1.18042e-06	24	22	53	5	['PHACTR1', 'MYOCD', 'PHACTR4', 'MKL1', 'PHACTR3']
Ion_trans_2:74:g	21	6	9	6	6.26882	19456	2.5146e-07	1.18042e-06	79	131	155	7	['KCNK15', 'KCNK10', 'KCNK2', 'KCNK16', 'KCNN2', 'KCNK6', 'LOC145814']
Gelsolin:39:q	21	6	14	6	6.84451	19456	2.5146e-07	1.18042e-06	76	33	104	3	['SVIL', 'SCIN', 'VIL1']
MFS_1:149:g	21	6	20	6	5.57916	19456	2.5146e-07	1.18042e-06	353	229	250	13	['SLC16A1', 'SLC16A10', 'SLC16A12', 'FLVCR1', 'SLC16A14', 'MFSD7', 'SV2A', 'SLC16A9', 'SLC16A4', 'SLC22A9', 'SPNS2', 'SV2B', 'SLC17A8']
PYRIN:24:e	21	6	11	6	7.73759	19456	2.5146e-07	1.18042e-06	74	57	56	3	['PYHIN1', 'AIM2', 'MEFV']
SOCS_box:28:s	21	6	12	6	7.73759	19456	2.5146e-07	1.18042e-06	35	61	56	6	['CISH', 'ASB8', 'ASB10', 'NEURL2', 'ASB17', 'ASB14']
7tm_4:137:k	188	141	163	130	7.88067	19456	2.51722e-07	1.18045e-06	280	469	454	105	['OR6C70', 'OR8B8', 'OR2A14', 'OR4F15', 'OR52N4', 'OR7D4', 'OR1C1', 'OR10H3', 'OR4D11', 'OR2AT4', 'OR6C4', 'OR2B2', 'OR14K1', 'OR10H1', 'OR51D1', 'OR51A7', 'OR5I1', 'OR52N1', 'OR56A4', 'OR4A47', 'OR2D3', 'OR51G2', 'OR51S1', 'OR4K2', 'OR5K1', 'OR14C36', 'OR5L2', 'OR52E6', 'OR52N5', 'OR51L1', 'OR2L1P', 'OR5M1', 'OR2T33', 'OR51B6', 'OR2T4', 'OR52A1', 'OR2K2', 'OR5D16', 'OR6C65', 'OR4F5', 'OR2M4', 'O…
Cadherin_2:71:e	42	19	30	19	7.55626	19456	2.65432e-07	1.24224e-06	83	178	127	19	['PCDHGA7', 'PCDHA4', 'PCDHA13', 'PCDHGA6', 'PCDHA11', 'PCDHA9', 'PCDHA6', 'PCDHB3', 'PCDHB1', 'PCDHA2', 'PCDHA3', 'PCDHGA3', 'PCDHA10', 'PCDHB11', 'PCDHB5', 'PCDHA12', 'PCDHA7', 'PCDHA1', 'PCDHG']
BTB_2:48:R	28	10	26	10	7.75053	19456	2.672e-07	1.24926e-06	94	74	74	17	['KCND3', 'KCNA10', 'KCNS2', 'KCTD8', 'KCNV2', 'KCNA1', 'KCTD16', 'KCTD18', 'KCND2', 'KCTD4', 'KCNF1', 'KCNA5', 'KCNB2', 'KCTD15', 'KCNA2', 'KCNS3', 'KCTD1']
CUB:77:G	60	32	41	32	6.52036	19456	2.73958e-07	1.27701e-06	110	128	372	14	['DMBT1', 'CSMD3', 'CSMD2', 'BMP1', 'OVCH1', 'TMPRSS15', 'CUBN', 'KREMEN1', 'ST14', 'C1S', 'EGFL4', 'CUZD1', 'TLL2', 'TLL1']
C2:90:t	60	32	41	32	5.75346	19456	2.73958e-07	1.27701e-06	103	325	633	28	['OTOF', 'CPNE4', 'RPGRIP1L', 'RIMS4', 'MCTP2', 'SYT3', 'TC2N', 'MCTP1', 'SYNGAP1', 'RIMS1', 'PRKCB', 'SYT4', 'RAB11FIP2', 'PIK3C2G', 'SYT7', 'CPNE6', 'PCLO', 'UNC13A', 'PLCB4', 'CPNE7', 'SYTL2', 'SYTL5', 'DYSF', 'CPNE5', 'KIAA0528', 'PLCD4', 'PLCG1', 'SYT2']
Cadherin:81:p	236	186	162	170	6.6227	19456	3.14871e-07	1.46478e-06	93	227	1363	71	['CDH10', 'PCDH11X', 'FAT', 'CDH9', 'PCDHB1', 'FAT2', 'CDH16', 'CDH20', 'DSG4', 'PCDHGB2', 'PCDHGB3', 'PCDH12', 'CLSTN2', 'PCDHA8', 'PCDH10', 'PCDH18', 'PCDHA4', 'PCDHGA9', 'PCDHGC3', 'PCDHGB4', 'PCDHGC5', 'CDH18', 'PCDHB13', 'PCDHAC1', 'CELSR3', 'CDH7', 'PCDHA1', 'PCDHAC2', 'CDH12', 'PCDHA13', 'PCDHA7', 'CDH5', 'PCDHGA6', 'PCDHB12', 'CDH11', 'PCDHB10', 'PCDHB8', 'PCDHA12', 'FAT3', 'CELSR2', 'PCD…
Ldl_recept_a:31:g	57	30	51	30	6.74711	19456	3.21706e-07	1.49508e-06	37	82	302	16	['LRP1', 'TMPRSS3', 'LRP3', 'LRP1B', 'C8A', 'LRP2', 'VLDLR', 'SORL1', 'LRP10', 'LRP12', 'ST14', 'TMPRSS6', 'CORIN', 'SPINT1', 'RXFP2', 'NETO2']
PH:62:e	53	27	47	27	5.85264	19456	3.4687e-07	1.60561e-06	105	511	522	17	['SPATA13', 'BTK', 'C10orf81', 'PLEKHO2', 'CIT', 'KIF1A', 'PLEKHS1', 'GRB10', 'GRB14', 'RTKN2', 'FGD6', 'ARHGAP15', 'PLEKHD1', 'ARAP2', 'PLEKHA1', 'AFAP1L2', 'SH2B3']
SPRY:27:l	31	12	29	12	6.73179	19456	3.50389e-07	1.61868e-06	120	148	166	18	['RNF135', 'BTNL8', 'FSD1L', 'RANBP10', 'TRIM16', 'TRIM14', 'TRIM49C', 'TRIM69', 'RFPL1', 'TRIM17', 'SPSB1', 'TRIML2', 'LOC493829', 'TRIM65', 'RYR2', 'ENSG00000188683', 'TRIM21', 'BTNL9']
MORN:12:G	31	12	27	12	6.8122	19456	3.50389e-07	1.61868e-06	23	29	157	12	['JPH2', 'LOC728194', 'MORN2', 'ALS2', 'SETD7', 'MORN1', 'JPH3', 'RSPH10B', 'ALS2CL', 'JPH4', 'JPH1', 'MORN5']
P53:42:q	84	51	23	51	10.5006	19456	3.51576e-07	1.62094e-06	196	33	33	1	['TP53']
fn3:4:s	140	99	118	95	4.72301	19456	3.71964e-07	1.71155e-06	85	419	3017	42	['CNTN3', 'EGFLAM', 'TTN', 'DCC', 'DSCAM', 'NFASC', 'CNTN2', 'EPHB4', 'NRCAM', 'EPHA5', 'NCAM2', 'IL27RA', 'LRFN2', 'IL12RB1', 'IGDCC4', 'COL12A1', 'MYOM1', 'PTPRH', 'TIE1', 'DSCAML1', 'EPHA1', 'COL20A1', 'PTPRD', 'IGSF22', 'TNR', 'AXL', 'NEO1', 'TEK', 'SDK2', 'TNXB', 'PTPRO', 'FNDC3A', 'ROBO3', 'PRTG', 'TNC', 'MYBPC2', 'COL7A1', 'EPHB1', 'MYOM2', 'IGDCC3', 'FNDC3B', 'TNN']
Na_trans_assoc:179:R	26	9	21	9	8.99509	19456	3.9375e-07	1.8011e-06	184	29	29	7	['SCN4A', 'SCN7A', 'SCN8A', 'SCN3A', 'SCN5A', 'SCN11A', 'SCN10A']
FXa_inhibition:26:G	26	9	23	9	6.77625	19456	3.9375e-07	1.8011e-06	36	113	135	15	['MATN3', 'LRP8', 'LDLR', 'FBN1', 'LRP4', 'CD248', 'ASTN2', 'MATN2', 'LRP1', 'LRP1B', 'FBLN2', 'LRP5', 'F9', 'SCUBE2', 'MASP1']
SPRY:78:g	26	9	22	9	6.47803	19456	3.9375e-07	1.8011e-06	120	148	166	18	['TRIM58', 'FSD2', 'BTN1A1', 'TRIM22', 'RYR2', 'TRIM10', 'FBXO45', 'TRIML2', 'TRIM11', 'TRIM39', 'RFPL1', 'SPSB2', 'BTN3A1', 'RYR1', 'SPSB1', 'RFPL4B', 'TRIM5', 'TRIM16']
zf-met:12:s	62	34	54	33	6.37212	19456	4.06716e-07	1.85859e-06	25	281	426	28	['ZNF205', 'ZNF155', 'ZMAT4', 'ZNF320', 'ZNF808', 'ZNF28', 'WT1', 'ZBTB24', 'ZMAT1', 'ZNF701', 'ZNF700', 'ZNF652', 'SALL1', 'ZNF552', 'ZNF611', 'ZNF814', 'PRDM5', 'ZNF687', 'ZNF234', 'ZNF385D', 'BCL6B', 'ZNF582', 'ZFHX4', 'ZBTB49', 'ZNF530', 'GZF1', 'ZNF319', 'ZNF860']
Plectin:28:k	47	23	10	23	6.72994	19456	4.28333e-07	1.95162e-06	41	20	252	4	['PLEC', 'DSP', 'EVPL', 'DST']
Homeobox:1:r	67	38	54	38	6.50447	19456	4.58126e-07	2.08533e-06	57	381	420	39	['NKX2-1', 'LHX5', 'PAX7', 'RHOXF1', 'HOXA6', 'ESX1', 'CRX', 'EVX2', 'HOXD12', 'HOXC13', 'DUXA', 'ALX4', 'PROP1', 'DMBX1', 'BARHL1', 'PHOX2B', 'POU3F4', 'HOXC4', 'DLX5', 'PRRX1', 'VSX1', 'NKX2-2', 'PBX3', 'MEOX2', 'POU3F2', 'PAX3', 'LBX1', 'RAX', 'BARHL2', 'LHX6', 'POU6F2', 'PBX1', 'EVX1', 'HOXB13', 'ALX3', 'NOBOX', 'BSX', 'BARX1', 'NKX2-6']
EGF_CA:39:e	87	54	70	54	5.82904	19456	5.20153e-07	2.35614e-06	42	189	871	29	['CCBE1', 'LRP2', 'FBN1', 'HMCN1', 'FBN2', 'EMR1', 'MATN2', 'LRP1B', 'VWCE', 'FBLN7', 'SUSD1', 'FBN3', 'EMR2', 'FBLN2', 'LTBP3', 'NID1', 'SCUBE3', 'FBLN1', 'CD93', 'TLL1', 'NELL2', 'MATN3', 'EMR3', 'TPO', 'NELL1', 'LTBP4', 'EFEMP2', 'CD97', 'EGF']
Neur_chan_LBD:214:R	29	11	29	11	7.50282	19456	5.4941e-07	2.48382e-06	216	88	91	14	['GABRA3', 'CHRNB3', 'GABRA6', 'CHRNA5', 'HTR3C', 'GLRA4', 'GABRA4', 'GABRA1', 'CHRNB4', 'CHRNE', 'HTR3A', 'GABRA2', 'GABRR1', 'GLRA1']
ANF_receptor:337:g	24	8	16	8	7.2298	19456	5.63167e-07	2.53616e-06	352	92	91	11	['GRIK2', 'GRID2', 'NPR3', 'GRM5', 'GRIA4', 'GABBR2', 'GRM3', 'GRM8', 'GRIA2', 'GRM7', 'GRM1']
Helicase_C:107:t	24	8	23	8	6.10824	19456	5.63167e-07	2.53616e-06	111	196	198	14	['EIF4A1', 'CHD1L', 'DHX15', 'YTHDC2', 'RECQL', 'DDX41', 'DDX19B', 'DDX49', 'SMARCAL1', 'DDX3X', 'DHX34', 'DDX39A', 'DHX9', 'CHD4']
Sema:137:f	24	8	8	8	7.56767	19456	5.63167e-07	2.53616e-06	428	70	72	4	['SEMA6D', 'SEMA7A', 'PLXNA4', 'MET']
Mito_carr:60:G	24	8	24	8	5.70969	19456	5.63167e-07	2.53616e-06	97	100	261	16	['SLC25A13', 'SLC25A20', 'SLC25A4', 'SLC25A42', 'SLC25A40', 'SLC25A37', 'SLC25A31', 'SLC25A34', 'SLC25A28', 'UCP1', 'SLC25A35', 'SLC25A43', 'SLC25A29', 'MCART2', 'SLC25A45', 'SLC25A5']
Homeobox:2:r	69	40	63	40	6.54691	19456	6.21753e-07	2.79458e-06	57	381	420	35	['ZFHX4', 'PBX4', 'HOXD9', 'NKX2-1', 'HOXB13', 'HOXA10', 'POU2F3', 'LHX9', 'DRGX', 'HOXC4', 'HOXD4', 'POU3F1', 'GSX2', 'OTP', 'EVX2', 'LMX1A', 'POU4F2', 'NKX3-1', 'HOXC13', 'HOXA4', 'EMX1', 'ONECUT1', 'PAX4', 'ISL1', 'MNX1', 'DUXA', 'HOXB7', 'EN1', 'PROP1', 'CRX', 'ZFHX3', 'MEOX1', 'BSX', 'OTX1', 'OTX2']
ABC_tran:125:k	32	13	30	13	6.5453	19456	6.3802e-07	2.85117e-06	137	141	195	18	['ABCG8', 'ABCB4', 'ABCA6', 'TAP2', 'ABCC11', 'ABCC12', 'ABCA9', 'ABCC6', 'ABCA3', 'ABCC9', 'ABCD3', 'ABCA12', 'ABCE1', 'ABCA8', 'ABCB9', 'ABCB5', 'ABCD2', 'ABCA4']
ANF_receptor:312:g	32	13	25	13	7.64483	19456	6.3802e-07	2.85117e-06	352	92	91	11	['GRIK2', 'GRM7', 'GRIA2', 'GRIK1', 'GRIA4', 'GRM5', 'GRM2', 'GRIK3', 'GRIA1', 'GRID2', 'GRIK4']
Sulfotransfer_1:151:v	32	13	21	13	8.53792	19456	6.3802e-07	2.85117e-06	267	49	49	5	['HS3ST5', 'SULT4A1', 'SULT1E1', 'HS3ST4', 'HS3ST2']
ABC_membrane:170:k	32	13	21	13	7.39774	19456	6.3802e-07	2.85117e-06	274	68	108	8	['ABCC9', 'ABCC5', 'ABCC4', 'ABCC6', 'ABCC1', 'ABCC2', 'ABCC8', 'ABCB11']
Filament:280:r	32	13	32	13	7.4802	19456	6.3802e-07	2.85117e-06	312	104	102	21	['KRT38', 'KRT73', 'IFFO2', 'KRT19', 'KRT40', 'KRT12', 'KRT85', 'KRT8', 'DES', 'LMNB1', 'KRT9', 'KRT20', 'KRT33A', 'KRT84', 'KRT6A', 'KRT32', 'KRT76', 'KRT72', 'KRT2', 'KRT79', 'KRT3']
BACK:89:R	35	15	30	15	7.6237	19456	6.58243e-07	2.93309e-06	103	106	101	16	['KLHL2', 'KLHL9', 'KLHL29', 'KLHL32', 'KLHL17', 'KLHL12', 'KBTBD7', 'KLHL3', 'KLHL34', 'KLHL13', 'KLHL8', 'KLHL22', 'KLHL33', 'KLHL28', 'BTBD17', 'IPP']
SRCR:20:g	35	15	33	15	6.2051	19456	6.58243e-07	2.93309e-06	100	56	270	8	['LOXL2', 'CD163', 'SRCRB4D', 'CD5L', 'DMBT1', 'CD163L1', 'LOXL4', 'SSC5D']
LRR_8:18:d	151	110	122	106	6.36867	19456	6.71937e-07	2.98839e-06	61	364	1040	60	['FMOD', 'TLR9', 'PODN', 'VASN', 'IGFALS', 'RSU1', 'SLITRK1', 'NYX', 'LRIG1', 'LGR5', 'LRIG3', 'ISLR2', 'TLR8', 'RXFP1', 'PXDNL', 'LRRTM1', 'ERBB2IP', 'LGI2', 'LRRC1', 'NTRK3', 'LRRC40', 'LRRIQ4', 'LRRTM4', 'LRRC10', 'LRRC8A', 'LRCH2', 'LINGO2', 'LRRN2', 'LRRC4B', 'LRRK2', 'LRRC52', 'LRTM1', 'SLITRK5', 'LRIG2', 'LRFN3', 'SLIT3', 'LRG1', 'LRRC7', 'SLIT1', 'SLIT2', 'LRRC38', 'RTN4R', 'SLITRK3', 'LR…
zf-C2H2:2:k	297	246	242	219	5.67216	19456	7.06152e-07	3.13755e-06	23	1207	3315	167	['ZNF568', 'ZNF660', 'ZNF19', 'ZNF43', 'ZNF236', 'ZBTB37', 'ZNF253', 'ZNF117', 'ZNF648', 'ZNF418', 'KLF3', 'ZNF480', 'ZNF251', 'ZNF691', 'ZNF665', 'ZNF268', 'ZNF248', 'ZFP90', 'ZNF700', 'ZIC4', 'ZNF3', 'ZNF256', 'SALL1', 'ZNF429', 'ZNF560', 'ZNF419', 'ZNF33B', 'ZNF71', 'ZNF70', 'ZNF337', 'ZNF83', 'ZNF491', 'ZNF354C', 'ZKSCAN4', 'ZNF93', 'ZNF772', 'ZNF805', 'ZNF467', 'ZNF211', 'MZF1', 'ZNF22', 'ZN…
Ion_trans:108:k	117	80	78	76	6.44745	19456	7.59645e-07	3.36239e-06	245	359	763	33	['CACNA1C', 'KCNH8', 'KCNQ3', 'KCNQ2', 'KCND2', 'SCN3A', 'CACNA1H', 'SCN5A', 'SCN1A', 'SCN10A', 'KCNH7', 'CACNA1I', 'NALCN', 'SCN2A', 'KCNG4', 'RYR2', 'SCN11A', 'KCNH3', 'HCN4', 'CNGA3', 'KCNH2', 'TPCN1', 'KCNC4', 'CACNA1A', 'SCN7A', 'CACNA1S', 'TRPV4', 'CACNA1D', 'CACNA1F', 'KCNH1', 'KCNQ5', 'KCNQ4', 'HCN1']
Myosin_head:614:r	22	7	21	7	6.80471	19456	7.72885e-07	3.39515e-06	677	99	112	12	['MYH7', 'MYH6', 'MYO1E', 'MYH9', 'MYO18A', 'MYH4', 'MYO5C', 'MYH10', 'MYO1A', 'MYH2', 'MYH1', 'MYH8']
SEA:28:e	22	7	22	7	6.7417	19456	7.72885e-07	3.39515e-06	106	51	117	2	['MUC16', 'TMPRSS7']
GPS:14:s	22	7	14	7	7.20267	19456	7.72885e-07	3.39515e-06	42	85	85	5	['GPR128', 'GPR113', 'GPR112', 'BAI3', 'GPR114']
MHC_I:45:a	22	7	16	7	6.8307	19456	7.72885e-07	3.39515e-06	179	110	110	3	['HLA-B', 'HLA-C', 'HLA-A']
FGF:110:k	22	7	19	6	8.32666	19456	7.72885e-07	3.39515e-06	125	40	39	5	['FGF14', 'FGF9', 'FGF22', 'FGF20', 'FGF13']
UCH:190:e	22	7	19	7	6.40261	19456	7.72885e-07	3.39515e-06	257	148	148	6	['USP29', 'USP47', 'USP3', 'USP41', 'USP49', 'USP9Y']
MH1:62:r	22	7	15	7	8.5246	19456	7.72885e-07	3.39515e-06	103	34	34	6	['SMAD9', 'NFIX', 'SMAD3', 'NFIC', 'NFIB', 'SMAD4']
Frizzled:211:r	22	7	22	7	9.91162	19456	7.72885e-07	3.39515e-06	324	13	13	9	['FZD6', 'FZD8', 'FZD7', 'FZD3', 'FZD2', 'FZD1', 'FZD4', 'FZD10', 'FZD9']
P53:32:y	119	82	35	80	11.0031	19456	7.89963e-07	3.46689e-06	196	33	33	2	['TP53', 'TP63']
Kelch_1:19:G	65	37	55	36	6.50611	19456	7.93777e-07	3.48035e-06	46	122	407	27	['KLHDC5', 'KLHL10', 'KLHL25', 'KLHL32', 'KLHDC8A', 'KLHL5', 'KLHL4', 'KLHL13', 'ENC1', 'KLHL23', 'KLHL1', 'KLHDC8B', 'KLHL34', 'KLHL24', 'KLHL8', 'KLHL3', 'KEAP1', 'KLHL11', 'KLHL29', 'KLHL35', 'HCFC1', 'KLHL15', 'KLHL12', 'KLHL17', 'KLHL38', 'LZTR1', 'ATRNL1']
VWA:41:g	38	17	31	17	6.44636	19456	8.74634e-07	3.83126e-06	175	144	248	12	['COL6A1', 'ANTXR2', 'COL6A6', 'COL6A3', 'COL12A1', 'COL6A2', 'FLJ35880', 'MATN4', 'ITGAM', 'COL14A1', 'ANTXR1', 'VIT']
fn3:70:e	200	155	145	142	5.23759	19456	8.81179e-07	3.8563e-06	85	419	3017	53	['SDK2', 'KAL1', 'PTPRF', 'ROBO2', 'CNTN5', 'FNDC3A', 'CNTN4', 'DCC', 'TNXB', 'FN1', 'FLRT2', 'TNR', 'FNDC3B', 'SDK1', 'COL12A1', 'TTN', 'PTPRD', 'USH2A', 'TNC', 'PTPRJ', 'CHL1', 'CNTN6', 'PTPRB', 'IGFN1', 'PTPRO', 'MYBPH', 'IL7R', 'PTPRK', 'IL12RB1', 'VWA1', 'EGFLAM', 'GHR', 'CNTN3', 'LRRN4', 'PRTG', 'IGSF9', 'CNTN1', 'PTPRM', 'FSD2', 'ITGB4', 'EPHA3', 'PTPRH', 'NFASC', 'EPHA5', 'OBSCN', 'COL14A…
ABC_tran:65:p	33	14	29	14	6.58969	19456	1.086e-06	4.7304e-06	137	141	195	16	['ABCB11', 'ABCC10', 'ABCC5', 'ABCB6', 'ABCC4', 'CFTR', 'ABCC1', 'ABCC8', 'ABCC2', 'ABCD2', 'ABCB1', 'ABCA8', 'ABCA3', 'ABCE1', 'ABCG8', 'ABCB4']
7tm_1:27:a	71	42	59	41	5.58299	19456	1.08366e-06	4.7304e-06	268	839	843	43	['GPR78', 'RRH', 'GPR101', 'HTR1A', 'MRGPRX1', 'PROKR1', 'ADRA1A', 'ADORA1', 'LHCGR', 'GPR132', 'NPY2R', 'GPR142', 'NPFFR2', 'GPR52', 'FPR1', 'MC4R', 'TACR2', 'NPY1R', 'CCKBR', 'CCR6', 'MRGPRX3', 'NPSR1', 'NMUR2', 'GPR109B', 'AGTR1', 'CNR1', 'GALR2', 'OPRK1', 'OPRL1', 'NPY5R', 'NPBWR2', 'GPR12', 'OPN4', 'TAAR1', 'CCBP2', 'RXFP4', 'HCRTR1', 'P2RY2', 'CHRM2', 'RGR', 'CCR7', 'HTR7', 'HTR2A']
RhoGEF:141:R	33	14	27	14	6.51754	19456	1.086e-06	4.7304e-06	181	200	205	17	['PLEKHG5', 'KALRN', 'FGD4', 'TRAD', 'ARHGEF7', 'ARHGEF1', 'MCF2', 'VAV3', 'TIAM2', 'FGD5', 'ITSN1', 'FGD6', 'PLEKHG1', 'ARHGEF15', 'TRIO', 'ARHGEF33', 'FGD1']
fn3:23:p	171	129	128	119	5.01158	19456	1.10531e-06	4.81001e-06	85	419	3017	53	['FSD1', 'TTN', 'USH2A', 'DSCAML1', 'CNTN2', 'BOC', 'IL12RB1', 'SDK1', 'NCAM2', 'MYBPH', 'EPHA7', 'CNTFR', 'CNTN4', 'TIE1', 'DSCAM', 'IGFN1', 'PTPRB', 'PTPRD', 'SDK2', 'PTPRK', 'TNXB', 'CNTN1', 'COL20A1', 'PTPRH', 'MYOM2', 'FNDC3B', 'NFASC', 'LRFN1', 'ROS1', 'COL14A1', 'TNR', 'ROBO1', 'MYOM3', 'NRCAM', 'MYBPC1', 'TNC', 'COL12A1', 'MYOM1', 'PRTG', 'PTPRG', 'GHR', 'EPHA8', 'EPHB1', 'DCC', 'EPHA4', …
PDZ:49:k	89	57	57	56	6.17715	19456	1.11803e-06	4.86081e-06	82	388	700	40	['APBA1', 'HTRA1', 'INADL', 'LRRC7', 'RIMS1', 'PDZRN4', 'DLG2', 'MPDZ', 'MAGI3', 'LNX1', 'RAPGEF6', 'MAGI1', 'SLC9A3R1', 'ARHGEF12', 'ARHGEF11', 'DVL1', 'PDZD3', 'PDZRN3', 'DLG1', 'GRID2IP', 'SIPA1', 'PDZD4', 'SHROOM3', 'PDZD7', 'PICK1', 'APBA2', 'SNTG2', 'MPP7', 'LNX2', 'SNTB1', 'PARD3', 'SHROOM2', 'PARD6B', 'SCRIB', 'PTPN13', 'LIMK2', 'MAGI2', 'PARD3B', 'TJP1', 'PDZD11']
Filament:223:r	42	20	42	20	7.87252	19456	1.13747e-06	4.93609e-06	312	104	102	23	['KRT79', 'KRT40', 'KRT75', 'KRT28', 'KRT26', 'KRT33B', 'KRT6B', 'KRT25', 'KRT23', 'DES', 'KRT73', 'KRT77', 'KRT35', 'NEFM', 'KRT1', 'KRT13', 'NES', 'KRT33A', 'KRT222', 'KRT86', 'KRT4', 'KRT6A', 'KRT9']
Pkinase_Tyr:116:G	42	20	28	20	4.24117	19456	1.13747e-06	4.93609e-06	260	1213	1264	21	['GUCY2C', 'JAK2', 'FGFR2', 'NTRK1', 'FLT3', 'TYK2', 'NPR1', 'ZAP70', 'TNK2', 'MAP3K11', 'SYK', 'KDR', 'DSTYK', 'BRAF', 'FGFR1', 'ARAF', 'BTK', 'STYK1', 'EPHA2', 'DDR2', 'FLT4']
Cadherin:63:s	230	184	164	175	6.58555	19456	1.15387e-06	4.99332e-06	93	227	1363	62	['CDH24', 'CDH12', 'PCDHAC2', 'PCDHB13', 'CDH18', 'FAT3', 'PCDHA13', 'PCDHB3', 'PCDHB5', 'CDH10', 'PCDH18', 'PCDHGA12', 'PCDHA9', 'PCDH10', 'DSC1', 'DSG2', 'CDH1', 'PCDHA8', 'DSG3', 'CDH9', 'PCDH7', 'PCDHA4', 'PCDHB1', 'FAT', 'PCDHA7', 'DSC2', 'PCDHB11', 'CDH7', 'CDHR3', 'PCDHA2', 'PCDHB14', 'PCDHGA8', 'PCDHB7', 'FAT4', 'FAT2', 'PCDHA3', 'PCDHB6', 'PCDHB12', 'PCDHA5', 'PCDHGB4', 'PCDHGA6', 'PCDHG…
I-set:23:t	200	156	132	148	4.9047	19456	1.20349e-06	5.20321e-06	90	839	3800	48	['TTN', 'LRRN1', 'OPCML', 'LRRC4B', 'OBSL1', 'OBSCN', 'HSPG2', 'FGFR3', 'SDK1', 'IGFBPL1', 'MYBPH', 'NTRK2', 'DSCAM', 'NFASC', 'NTRK3', 'CNTN5', 'HMCN1', 'PDGFRA', 'ROBO2', 'NRG1', 'MYOM2', 'CNTN1', 'LRIG3', 'IL1RL1', 'CNTN4', 'MYOM1', 'LINGO1', 'FGFR1', 'NEO1', 'DSCAML1', 'UNC5A', 'ROBO1', 'L1CAM', 'VCAM1', 'LSAMP', 'MDGA2', 'PALLD', 'PTPRF', 'LRRC4C', 'MYPN', 'ROBO3', 'CDON', 'FGFRL1', 'DCC', '…
Pkinase:13:G	88	56	63	56	5.27555	19456	1.21753e-06	5.25901e-06	264	1221	1293	53	['CAMK2D', 'STK32A', 'TRIO', 'CHEK2', 'RPS6KA2', 'MAP3K15', 'CAMKV', 'GRK7', 'PIM2', 'PKMYT1', 'PRKAA1', 'ADRBK1', 'SRPK2', 'MAPK14', 'MYLK4', 'MAPK8', 'PASK', 'ENSG00000168038', 'MST4', 'NEK5', 'AKT1', 'EIF2AK3', 'ERN2', 'GRK5', 'GSK3B', 'CAMK4', 'SNRK', 'CAMK1D', 'MAP2K7', 'PRKCD', 'CDK10', 'ULK1', 'EIF2AK2', 'CDK8', 'CAMK2A', 'STK32B', 'PKN3', 'MAP2K1', 'ACVR2B', 'IRAK1', 'STK38L', 'DCLK1', 'M…
ANF_receptor:165:r	25	9	18	9	7.28869	19456	1.29307e-06	5.55434e-06	352	92	91	10	['GRM6', 'GRM2', 'GPRC6A', 'GRM8', 'GRIA2', 'GRIK3', 'GRM1', 'GRIK2', 'GRM3', 'GRIA1']
VWA:37:g	43	21	38	21	6.6247	19456	1.29042e-06	5.55434e-06	175	144	248	15	['ITGA10', 'ITIH3', 'VIT', 'COL6A2', 'COL12A1', 'VWA2', 'COL6A6', 'COL22A1', 'COL6A3', 'COL21A1', 'COL6A1', 'ITGAL', 'COL7A1', 'MATN4', 'COL28A1']
Filament:307:E	25	9	24	9	7.12406	19456	1.29307e-06	5.55434e-06	312	104	102	18	['KRT25', 'KRT6A', 'KRT33A', 'KRT83', 'KRT5', 'KRT38', 'KRT24', 'DES', 'KRT1', 'KRT222', 'KRT17', 'KRT28', 'INA', 'KRT37', 'KRT19', 'KRT23', 'KRT84', 'KRT80']
7tm_4:233:r	189	146	184	142	7.88832	19456	1.28887e-06	5.55434e-06	280	469	454	84	['OR10A4', 'OR5W2', 'OR2W3', 'OR51B5', 'OR7A5', 'OR51F2', 'OR6B1', 'OR2M7', 'OR51I1', 'OR8J3', 'OR51E2', 'OR1Q1', 'OR52D1', 'OR11H6', 'OR7D2', 'OR51A7', 'OR10Z1', 'OR2A5', 'OR2L13', 'OR2B11', 'OR10P1', 'OR9A2', 'OR52N5', 'OR1M1', 'OR10A5', 'OR10G8', 'OR52K2', 'OR5M9', 'OR1I1', 'OR51M1', 'OR6K2', 'OR51F1', 'OR2A12', 'OR13J1', 'OR6C70', 'OR2M2', 'OR51A4', 'OR13F1', 'OR1J4', 'OR5AC2', 'OR2AG2', 'OR2…
Filamin:53:p	25	9	16	9	5.54856	19456	1.29307e-06	5.55434e-06	103	28	304	6	['FLNB', 'KDELC2', 'FLNA', 'TRIM3', 'KDELC1', 'FLNC']
Cadherin:73:a	219	174	165	166	6.51485	19456	1.30583e-06	5.60398e-06	93	227	1363	62	['CELSR3', 'PCDHGA8', 'PCDHA5', 'PCDHGB7', 'PCDHB4', 'FAT4', 'CDH18', 'PCDHB15', 'PCDH10', 'PCDHA2', 'PCDHGB2', 'PCDH9', 'CDH3', 'DCHS1', 'PCDHB6', 'PCDHA6', 'CDH26', 'CDH11', 'PCDHA12', 'PCDHB10', 'FAT', 'PCDHB3', 'PCDHGA6', 'PCDHA7', 'DSG4', 'PCDHGA1', 'PCDHGA12', 'PCDHA11', 'FAT3', 'PCDHA8', 'CELSR2', 'PCDHA10', 'PCDHB11', 'CDH10', 'CDH22', 'CDH19', 'PCDH17', 'PCDHA1', 'PCDHGA11', 'PCDHGB4', '…
V-set:37:p	77	47	65	46	6.28499	19456	1.31812e-06	5.6515e-06	109	958	562	29	['HEPACAM', 'CD300LG', 'CD48', 'HAVCR2', 'VCAN', 'C10orf54', 'CEACAM5', 'BCAN', 'CD86', 'NCAN', 'CEACAM7', 'VPREB1', 'CD8B', 'CD33', 'PIGR', 'HAPLN3', 'SIGLEC11', 'VSTM2A', 'TIMD4', 'CTLA4', 'SIGLEC6', 'CD83', 'SIGLEC12', 'SIGLEC9', 'PSG9', 'CEACAM6', 'HAVCR1', 'SCN2B', 'SLAMF6']
7tm_1:79:s	73	44	54	44	5.62307	19456	1.32732e-06	5.6857e-06	268	839	843	39	['AVPR2', 'OPRM1', 'GPR173', 'HTR2A', 'HTR1A', 'GPR151', 'PROKR1', 'GPR37', 'CHRM3', 'ADRA1A', 'GPR4', 'GHSR', 'PPYR1', 'PTGER3', 'TAAR2', 'S1PR3', 'GPR50', 'HCRTR2', 'TACR3', 'AVPR1B', 'HTR2C', 'DRD4', 'MRGPRX2', 'PTGFR', 'ADORA1', 'CCR1', 'TRHR', 'C5AR1', 'MTNR1B', 'CXCR2', 'CCR2', 'HCRTR1', 'CCRL2', 'GPR142', 'GPR65', 'GPR162', 'TAAR5', 'NMUR2', 'BRS3']
Pkinase:101:k	90	58	68	57	5.30798	19456	1.34613e-06	5.75571e-06	264	1221	1293	42	['CDK9', 'MARK2', 'ENSG00000132356', 'TAOK2', 'PRKAA2', 'ACVR2A', 'ULK3', 'SNRK', 'BUB1B', 'MAP3K15', 'CDK20', 'MGC42105', 'EIF2AK4', 'CDK18', 'HIPK3', 'STK24', 'DYRK1B', 'CHEK1', 'PRPF4B', 'STK36', 'PRKACA', 'LATS1', 'STK17A', 'MAP3K3', 'SIK1', 'GRK1', 'TLK1', 'SCYL1', 'ROCK2', 'TLK2', 'CHEK2', 'LATS2', 'TRIO', 'MYO3B', 'PRKD1', 'CSNK2A2', 'PKN1', 'MYLK4', 'MAST2', 'CLK2', 'PSKH2', 'PRKAA1']
Ank_2:33:A	91	59	68	58	5.04388	19456	1.63494e-06	6.97136e-06	84	529	1570	45	['ANKRD50', 'MYO16', 'ANK1', 'ASAP3', 'ESPN', 'EHMT1', 'BCL3', 'TRPC6', 'ASZ1', 'NOTCH3', 'NOTCH4', 'IBTK', 'DGKZ', 'EHMT2', 'ANKRD52', 'ASB10', 'ANKRD44', 'ANKRD27', 'RNASEL', 'HACE1', 'ANKRD5', 'ANKMY1', 'ACBD6', 'ANKHD1', 'GIT2', 'TANC2', 'INVS', 'ESPNL', 'FANK1', 'OSBPL1A', 'SHANK1', 'ANKRD53', 'ABTB2', 'RP11-268F1.2', 'ASB15', 'ANKRD22', 'CLIP4', 'POTEH', 'TRPC3', 'ANKRD33', 'PPP1R12C', 'DGK…
Helicase_C:48:g	28	11	23	11	6.33063	19456	1.64733e-06	6.9985e-06	111	196	198	17	['RAD54L', 'SNRNP200', 'WRN', 'DHX37', 'DDX47', 'SMARCA2', 'DDX39A', 'DDX17', 'DDX53', 'CHD1', 'CHD5', 'CHD4', 'SKIV2L2', 'EIF4A2', 'DDX46', 'CHD8', 'SHPRH']
Trypsin:29:G	28	11	25	11	6.15263	19456	1.64733e-06	6.9985e-06	221	210	224	19	['F7', 'PRSS54', 'CTSG', 'HGFAC', 'PRSS23', 'PRSS1', 'PRSS3', 'PRSS22', 'CTRC', 'TMPRSS15', 'PRSS38', 'KLK1', 'CELA3A', 'PRSS58', 'PRSS53', 'TMPRSS11D', 'F10', 'HPN', 'PRSS55']
7tm_3:199:l	28	11	11	11	8.4054	19456	1.64733e-06	6.9985e-06	234	47	47	1	['GRM7']
Sugar_tr:136:R	28	11	19	11	7.16557	19456	1.64733e-06	6.9985e-06	452	106	111	12	['SLC2A9', 'SLC22A16', 'SLC2A11', 'SLC22A5', 'SV2B', 'SLC2A10', 'SLC22A6', 'SV2A', 'SLC22A8', 'SLC2A1', 'SLC2A6', 'SLC22A12']
Pkinase:164:l	121	85	102	83	5.73499	19456	1.6533e-06	7.01746e-06	264	1221	1293	48	['CDK17', 'CDC42BPA', 'SRPK3', 'MKNK2', 'LRRK2', 'CDK8', 'MAPK9', 'RPS6KC1', 'MAPK13', 'PAK7', 'CDKL5', 'CDK15', 'RPS6KA2', 'CDK10', 'TRIB3', 'DCLK3', 'PLK1', 'CDK19', 'CDK20', 'ULK3', 'DYRK1A', 'SGK2', 'DMPK', 'AAK1', 'STK39', 'HUNK', 'PKN2', 'MELK', 'PRKACA', 'MOS', 'MAP2K3', 'SLK', 'TRIB1', 'UHMK1', 'MAST2', 'MARK1', 'RPS6KA1', 'PRKCG', 'CLK2', 'CHEK2', 'PRPF4B', 'ACVR2A', 'MAK', 'STK11', 'CDK…
Kelch_1:22:g	60	34	50	34	6.39063	19456	1.74311e-06	7.37848e-06	46	122	407	25	['KLHL4', 'IVNS1ABP', 'KLHDC10', 'KBTBD6', 'KEAP1', 'HCFC1', 'KBTBD2', 'LZTR1', 'HCFC2', 'KLHL1', 'KLHL5', 'KLHL32', 'KLHL3', 'KLHL33', 'KLHL25', 'KLHL14', 'KLHL23', 'KLHL12', 'KLHL36', 'KLHL9', 'KLHDC8A', 'KLHL24', 'KLHL17', 'KBTBD5', 'KBTBD7']
Filamin:4:p	31	13	17	13	5.8589	19456	1.7865e-06	7.5347e-06	103	28	304	3	['FLNB', 'FLNA', 'FLNC']
E1-E2_ATPase:40:r	31	13	21	13	6.89737	19456	1.7865e-06	7.5347e-06	221	117	148	10	['ATP2B3', 'ATP4A', 'ATP8A1', 'ATP12A', 'ATP2C1', 'ATP2B4', 'ATP10B', 'ATP13A4', 'ATP10A', 'ATP1A3']
Filament:220:e	31	13	30	13	7.4344	19456	1.7865e-06	7.5347e-06	312	104	102	15	['KRT25', 'BFSP2', 'KRT23', 'KRT37', 'KRT75', 'KRT13', 'DES', 'KRT36', 'GFAP', 'KRT86', 'KRT19', 'KRT26', 'KRT76', 'KRT77', 'KRT2']
Cadherin:34:s	227	182	160	166	6.56661	19456	1.80382e-06	7.60088e-06	93	227	1363	70	['CDH10', 'DSG3', 'PCDHA1', 'PCDH11Y', 'PCDHGA12', 'DSG4', 'CDH16', 'FAT3', 'PCDHGA6', 'PCDHGC4', 'PCDHA9', 'CDH18', 'CDH17', 'CDH8', 'FAT2', 'PCDHGB7', 'PCDHA5', 'PCDH17', 'PCDHA10', 'PCDHB2', 'PCDHGB6', 'FAT', 'PCDHA4', 'DSC1', 'PCDHB13', 'DSC3', 'CDHR2', 'PCDHB11', 'PCDHG', 'PCDH12', 'PCDHA6', 'PCDHB8', 'FAT4', 'PCDHA8', 'PCDHGA9', 'PCDHB6', 'PCDH9', 'PCDHA13', 'PCDHGA7', 'CDH22', 'CLSTN1', 'C…
Ldl_recept_b:37:g	37	17	35	17	6.95269	19456	1.84078e-06	7.74417e-06	42	28	170	11	['VLDLR', 'LRP5', 'LRP4', 'LRP2', 'LRP1B', 'LRP6', 'LRP5L', 'LRP8', 'LRP1', 'LDLR', 'SORL1']
VWA:152:a	23	8	19	8	5.722	19456	1.92113e-06	8.02973e-06	175	144	248	13	['ITGA1', 'ANTXR1', 'MATN1', 'VWA1', 'ITIH5L', 'COL6A3', 'MATN2', 'ITGA10', 'VIT', 'COL14A1', 'VWF', 'COL21A1', 'ITGAE']
Ricin_B_lectin:49:r	23	8	16	8	8.39079	19456	1.92113e-06	8.02973e-06	127	39	39	8	['GALNT1', 'GALNT13', 'GALNT10', 'GALNT6', 'GALNT14', 'GALNT3', 'GALNTL6', 'GALNT12']
PDEase_I:190:g	23	8	8	8	7.20046	19456	1.92113e-06	8.02973e-06	238	89	89	5	['PDE3B', 'PDE4A', 'PDE1A', 'PDE2A', 'PDE4C']
Filament:142:e	23	8	23	8	7.00377	19456	1.92113e-06	8.02973e-06	312	104	102	9	['DES', 'PRPH', 'KRT81', 'KRT78', 'NEFH', 'KRT15', 'KRT82', 'KRT28', 'KRT13']
Cadherin_2:36:r	48	25	35	25	7.74891	19456	2.07315e-06	8.64957e-06	83	178	127	23	['PCDHB2', 'PCDHA7', 'PCDHGA1', 'PCDHA2', 'PCDHGA3', 'PCDHGA5', 'PCDHA10', 'PCDHB11', 'PCDHA9', 'PCDHAC1', 'PCDHGC4', 'PCDH10', 'PCDHB12', 'PCDHB3', 'PCDHGB1', 'PCDHGA12', 'PCDHG', 'PCDHA3', 'PCDHA12', 'PCDHA1', 'PCDHB5', 'PCDHGA11', 'PCDHA13']
SH3_9:44:P	40	19	25	19	5.35302	19456	2.12694e-06	8.86607e-06	49	409	557	19	['NEBL', 'PRMT2', 'SORBS2', 'ITSN2', 'SH3BP4', 'NCK2', 'ARHGEF16', 'BAIAP2L1', 'DNMBP', 'RIMBP2', 'CD2AP', 'SORBS1', 'ITSN1', 'ASAP2', 'MAP3K11', 'FUT8', 'BAIAP2L2', 'FCHSD2', 'ARHGAP26']
Ig_2:41:n	56	31	45	28	4.27348	19456	2.23555e-06	9.30214e-06	79	811	1648	23	['FCRL5', 'IL1RL2', 'PSG9', 'CEACAM1', 'VSTM1', 'FCRL2', 'PSG4', 'HSPG2', 'CNTN5', 'PSG2', 'LILRB4', 'FCRL1', 'CEACAM6', 'LILRA4', 'BCAM', 'FCRL6', 'FCRL3', 'LILRA1', 'IGSF1', 'LILRB2', 'LILRB5', 'FCER1A', 'FCRLA']
Pkinase:10:G	96	64	63	64	5.40109	19456	2.31556e-06	9.60927e-06	264	1221	1293	47	['SGK2', 'NEK5', 'ACVR1B', 'DYRK1B', 'MAK', 'BUB1', 'GSK3B', 'TTK', 'MAP4K1', 'TGFBR1', 'GSK3A', 'AKT3', 'AKT2', 'CDK15', 'MAP3K1', 'TNIK', 'CAMK2A', 'ULK2', 'RPS6KA3', 'RPS6KA6', 'MAPK9', 'CDK2', 'MAST3', 'MAP2K7', 'WEE1', 'CAMK1G', 'EIF2AK2', 'CSNK1G2', 'CDC42BPG', 'TRIO', 'DYRK3', 'PKMYT1', 'MARK1', 'DCLK1', 'CDK13', 'TLK1', 'MYO3A', 'PLK4', 'PAK7', 'TTBK1', 'PRKAA2', 'MAST1', 'MARK2', 'WNK3',…
Sushi:54:P	96	64	64	62	6.07938	19456	2.31556e-06	9.60927e-06	56	146	808	19	['SEZ6', 'CFHR5', 'CSMD3', 'CSMD2', 'SELL', 'CR2', 'CFH', 'CR1', 'CFHR4', 'CD55', 'SEZ6L2', 'CD46', 'CR1L', 'C4BPB', 'APOH', 'MASP1', 'SELE', 'TPO', 'C4BPA']
Pkinase_Tyr:42:e	38	18	30	18	4.09678	19456	2.43484e-06	1.00773e-05	260	1213	1264	23	['AATK', 'LTK', 'EPHB3', 'LCK', 'STYK1', 'HCK', 'ARAF', 'JAK2', 'DDR2', 'EPHA8', 'EPHB2', 'EGFR', 'KDR', 'ERBB4', 'FYN', 'FGFR4', 'ROR1', 'PDGFRB', 'EPHA6', 'FER', 'ERBB3', 'JAK1', 'KSR2']
HLH:5:h	38	18	21	18	6.63237	19456	2.43484e-06	1.00773e-05	55	218	218	11	['NEUROD1', 'MYCN', 'NEUROD4', 'TFEB', 'TFAP4', 'MAX', 'ARNT', 'NEUROD6', 'FERD3L', 'HAND2', 'TAL1']
EGF:5:p	90	59	64	59	6.52814	19456	2.44479e-06	1.01095e-05	32	245	555	23	['NOTCH3', 'JAG1', 'DNER', 'HABP2', 'NOTCH1', 'CRB2', 'SLIT2', 'EDIL3', 'MMRN1', 'NOTCH4', 'SLIT3', 'JAG2', 'NOTCH2', 'CRB1', 'DLL4', 'NOTCH2NL', 'DLL3', 'PTGS1', 'DLK1', 'SNED1', 'DLL1', 'F10', 'CUBN']
SEA:72:t	26	10	26	10	6.9827	19456	2.61194e-06	1.07244e-05	106	51	117	3	['MUC16', 'GPR110', 'IMPG2']
Actin:343:R	26	10	26	10	8.20921	19456	2.61194e-06	1.07244e-05	407	40	50	9	['ACTL6B', 'ACTC1', 'ACTR6', 'ARPM1', 'ACTL7B', 'ACTL7A', 'ACTG1', 'ACTRT2', 'ACTA2']
Lig_chan:65:s	21	7	16	7	8.15263	19456	2.76271e-06	1.13036e-05	149	42	42	5	['GRIA4', 'GRIA2', 'GRIN2A', 'GRIN3B', 'GRIK4']
LCE:46:r	21	7	21	7	9.08552	19456	2.76271e-06	1.13036e-05	76	17	22	10	['LCE3D', 'LCE3B', 'LCE1E', 'LCE4A', 'LCE1F', 'LCE3E', 'LCE2D', 'LCE2B', 'LCE1D', 'LCE3A']
zf-C4:22:g	21	7	11	7	6.29702	19456	2.76271e-06	1.13036e-05	70	152	152	8	['HNF4A', 'NR4A3', 'ESR2', 'NR1H3', 'RXRB', 'Q8N8C9', 'NR2E1', 'RORC']
C2:103:l	21	7	11	7	4.23889	19456	2.76271e-06	1.13036e-05	103	325	633	5	['UNC13C', 'PCLO', 'RIMS2', 'UNC13D', 'RASAL1']
SRCR:85:g	32	14	27	14	6.07581	19456	2.91361e-06	1.19e-05	100	56	270	5	['CD163', 'DMBT1', 'CD163L1', 'CD5L', 'MSR1']
Cadherin_tail:61:a	32	14	2	14	8.76031	19456	2.91361e-06	1.19e-05	133	42	42	15	['PCDHA4', 'PCDHA8', 'PCDHA6', 'PCDHA2', 'PCDHA7', 'PCDHA9', 'PCDHA10', 'PCDHA5', 'PCDHA1', 'PCDHAC2', 'PCDHA13', 'PCDHAC1', 'PCDHA3', 'PCDHA11', 'PCDHA12']
TSP_1:33:q	68	41	52	40	6.47854	19456	2.96878e-06	1.20935e-05	49	105	434	22	['THSD7A', 'SEMA5B', 'THSD7B', 'ADAMTS2', 'BAI3', 'CFP', 'C7', 'THBS2', 'ADAMTS5', 'HMCN1', 'SEMA5A', 'ADAMTSL4', 'ADAMTS20', 'THBS1', 'ADAMTS17', 'ADAMTSL3', 'C8A', 'ADAMTS7', 'PAPLN', 'C8B', 'ADAMTS18', 'C6']
Pkinase_Tyr:58:l	58	33	42	33	4.70683	19456	3.0297e-06	1.23093e-05	260	1213	1264	12	['FYN', 'FGFR1', 'NPR1', 'ALK', 'JAK1', 'EPHA3', 'ERBB2', 'MERTK', 'MAP3K11', 'EPHA5', 'FLJ23356', 'RIPK2']
fn3:28:g	173	133	126	122	5.02836	19456	3.1587e-06	1.28222e-05	85	419	3017	52	['DSCAML1', 'FNDC3A', 'LRFN2', 'PTPRB', 'COL20A1', 'CHL1', 'IL31RA', 'TTN', 'SDK1', 'USH2A', 'DCC', 'IL12RB1', 'ROBO1', 'FNDC3B', 'L1CAM', 'TNXB', 'DSCAM', 'TRIM36', 'FN1', 'EPHA4', 'EGFLAM', 'TRIM9', 'CNTN6', 'GHR', 'IGFN1', 'TEK', 'PTPRH', 'FNDC1', 'CNTN5', 'PTPRD', 'NCAM2', 'BOC', 'COL12A1', 'EPHB2', 'MYOM2', 'MYBPC2', 'LRRN4', 'SNED1', 'TNC', 'CDON', 'ROBO2', 'IGSF9', 'NRCAM', 'EPHA1', 'SORL1…
Ig_3:48:s	100	68	76	68	4.42962	19456	3.36626e-06	1.3641e-05	79	936	2641	37	['HMCN1', 'IGSF10', 'NFASC', 'NCAM2', 'ROBO1', 'CADM2', 'OPCML', 'FCRL6', 'DSCAM', 'CNTN5', 'CNTN3', 'HSPG2', 'CNTN6', 'PVRL4', 'ROBO2', 'CADM3', 'FLT1', 'CSF1R', 'NEGR1', 'PTPRD', 'MDGA2', 'FSTL5', 'VCAM1', 'CDON', 'LRIG2', 'NRCAM', 'NEO1', 'PXDNL', 'CEACAM6', 'L1CAM', 'BSG', 'SDK1', 'FSTL4', 'NPHS1', 'PTK7', 'CEACAM7', 'DSCAML1']
Pkinase:105:k	94	63	71	63	5.37071	19456	3.69393e-06	1.49558e-05	264	1221	1293	51	['MARK2', 'PHKG1', 'CAMK2B', 'MAPKAPK3', 'RPS6KA3', 'STK39', 'DCLK2', 'PAK1', 'ACVR2A', 'PRKCA', 'RNASEL', 'MYO3B', 'WNK4', 'RPS6KB1', 'CAMK4', 'CLK2', 'STK32C', 'PAK2', 'AKT3', 'MAP3K3', 'CDK13', 'CDK17', 'PRKACG', 'CSNK1E', 'NUAK1', 'EIF2AK1', 'TTK', 'MAPK1', 'PKN1', 'CAMKV', 'OXSR1', 'EIF2AK4', 'CDK2', 'PRKCE', 'RPS6KA4', 'ULK1', 'PIM2', 'HUNK', 'TSSK3', 'MARK4', 'STK11', 'BRSK1', 'PIM1', 'MAP…
zf-C2H2_4:15:a	69	42	60	42	5.32894	19456	3.80751e-06	1.53621e-05	24	1179	977	33	['ZNF557', 'ZNF699', 'SNAI2', 'ZNF526', 'ZBTB7B', 'ZNF441', 'SP1', 'ZNF443', 'ZNF596', 'ZNF433', 'ZNF236', 'ZNF878', 'ZNF423', 'SALL3', 'ZNF426', 'VEZF1', 'ZNF57', 'GFI1B', 'OVOL2', 'GZF1', 'ZNF337', 'ZNF689', 'ZNF439', 'ZNF317', 'ZNF799', 'ZNF436', 'ZNF256', 'ZNF778', 'ZBTB26', 'ZNF408', 'ZNF710', 'ZNF555', 'ZNF556']
Sushi:10:g	108	75	71	72	6.24931	19456	3.96085e-06	1.5967e-05	56	146	808	25	['PAPPA', 'CFH', 'CSMD2', 'CSMD3', 'CR1', 'CFHR1', 'MASP1', 'CD46', 'APOH', 'CR2', 'SEZ6', 'CFB', 'C4BPA', 'SRPX2', 'SEZ6L', 'SUSD2', 'CFHR4', 'CFHR2', 'CFHR5', 'TPO', 'F13B', 'SUSD4', 'C7', 'CFHR3', 'SELE']
Guanylate_cyc:69:e	24	9	20	9	8.21403	19456	4.08879e-06	1.64116e-05	183	32	46	8	['GUCY1A2', 'ADCY5', 'ADCY10', 'NPR1', 'ADCY2', 'GUCY1B3', 'GUCY2D', 'ADCY8']
Kringle:2:l	24	9	22	9	7.03715	19456	4.08879e-06	1.64116e-05	79	39	104	4	['LPA', 'PIK3IP1', 'PLAU', 'PLG']
Y_phosphatase:172:p	24	9	13	9	6.19843	19456	4.08879e-06	1.64116e-05	235	152	186	7	['PTPRR', 'PTPRN', 'PTPRK', 'PTPN11', 'PTPRM', 'PTPRJ', 'PTPRU']
MAGE:179:q	24	9	22	9	8.21403	19456	4.08879e-06	1.64116e-05	213	46	46	13	['MAGEE1', 'MAGEB1', 'NDN', 'MAGEA6', 'MAGEC1', 'MAGEA3', 'MAGEA11', 'MAGEA4', 'MAGEA1', 'MAGEA10', 'MAGEA8', 'MAGEA12', 'MAGEB2']
UDPGT:490:r	24	9	8	9	8.183	19456	4.08879e-06	1.64116e-05	499	41	47	12	['UGT2B28', 'UGT1A1', 'UGT1A5', 'UGT1A8', 'UGT1A6', 'UGT2B11', 'UGT2B10', 'UGT1A7', 'UGT1A10', 'UGT1A4', 'UGT1A3', 'UGT1A9']
Homeobox:36:k	64	38	54	37	6.43838	19456	4.12758e-06	1.6553e-05	57	381	420	38	['ARGFX', 'HMX1', 'HMBOX1', 'PRRX1', 'NOBOX', 'DLX5', 'PITX2', 'TLX3', 'HOXB2', 'DBX2', 'NKX6-1', 'DUXA', 'HMX3', 'POU2F1', 'SATB2', 'GSX1', 'HOXC9', 'SHOX', 'HOXA7', 'ISX', 'LMX1A', 'NKX2-6', 'MEOX1', 'NKX3-2', 'OTP', 'BARX1', 'GBX2', 'ZHX1', 'ISL1', 'LMX1B', 'MSX1', 'HOXA13', 'NKX2-2', 'ZFHX3', 'HOXA6', 'ZFHX4', 'UNCX', 'PRRX2']
HLH:24:r	36	17	25	17	6.55437	19456	4.19468e-06	1.67499e-05	55	218	218	15	['HAND2', 'MAX', 'FERD3L', 'NEUROD2', 'NHLH2', 'ID3', 'HEY2', 'NHLH1', 'NEUROG1', 'MSGN1', 'SOHLH1', 'HEYL', 'TAL1', 'OLIG3', 'TWIST2']
Y_phosphatase:216:R	36	17	19	17	6.7834	19456	4.19468e-06	1.67499e-05	235	152	186	10	['PTPRA', 'PTPRD', 'PTPRE', 'PTPRR', 'PTPRU', 'PTPRZ1', 'PTPRK', 'PTPRG', 'PTPN5', 'PTPN1']
Cadherin_2:9:E	36	17	22	17	7.33387	19456	4.19468e-06	1.67499e-05	83	178	127	13	['PCDH11Y', 'PCDHA9', 'PCDH18', 'PCDHB10', 'PCDHA5', 'PCDHA4', 'PCDHA1', 'PCDHB1', 'PCDH12', 'PCDHG', 'PCDHA7', 'PCDHB14', 'PCDHB12']
SH3_9:41:G	36	17	25	17	5.20102	19456	4.19468e-06	1.67499e-05	49	409	557	14	['TNK2', 'ITSN1', 'DBNL', 'NOSTRIN', 'ARHGAP32', 'NCK2', 'BIN1', 'UBASH3B', 'CD2AP', 'CASS4', 'BZRAP1', 'DNMBP', 'SH3RF1', 'BAIAP2L1']
Mito_carr:57:k	43	22	37	22	6.55099	19456	4.21796e-06	1.68284e-05	97	100	261	23	['SLC25A23', 'SLC25A36', 'SLC25A38', 'SLC25A25', 'SLC25A17', 'SLC25A45', 'UCP2', 'SLC25A13', 'SLC25A21', 'SLC25A27', 'SLC25A1', 'UCP3', 'SLC25A39', 'UCP1', 'SLC25A40', 'SLC25A47', 'SLC25A34', 'SLC25A48', 'SLC25A12', 'SLC25A30', 'SLC25A37', 'SLC25A29', 'SLC25A11']
Ig_2:14:g	75	47	52	47	4.69495	19456	4.25301e-06	1.69537e-05	79	811	1648	29	['FCRL5', 'CEACAM1', 'LAIR2', 'FCRL6', 'FCRL3', 'FCRL1', 'SIGLEC12', 'HSPG2', 'FCRL4', 'PSG4', 'FCRL2', 'PSG5', 'FCGR1A', 'VSTM1', 'CLMP', 'SIGLEC10', 'LILRB5', 'CEACAM5', 'FCRLA', 'FCRLB', 'FCGR2A', 'SIGLEC1', 'FCGR2B', 'LILRA2', 'CD22', 'CNTN5', 'FCER1A', 'IL1RL2', 'CD86']
7tm_4:209:n	118	84	117	79	7.20872	19456	4.44221e-06	1.76776e-05	280	469	454	87	['OR6C4', 'OR6B2', 'OR7A5', 'OR2J3', 'OR10G9', 'OR9G1', 'OR4C6', 'OR14I1', 'OR51E2', 'OR4X1', 'OR4A47', 'OR2D2', 'OR2AE1', 'OR6F1', 'OR2M4', 'OR4D2', 'OR6C76', 'OR5B17', 'OR6C1', 'OR3A2', 'OR10A2', 'OR2M2', 'OR14J1', 'OR2H2', 'OR2T35', 'OR52H1', 'OR2T10', 'OR56B1', 'OR13C2', 'OR4D10', 'OR8U1', 'OR51I2', 'OR11H6', 'OR4P4', 'OR4F6', 'OR5H15', 'OR8K5', 'OR10T2', 'OR10G3', 'OR2AK2', 'OR56A3', 'OR7D4'…
Ig_3:29:p	118	84	88	83	4.6684	19456	4.44221e-06	1.76776e-05	79	936	2641	47	['HMCN1', 'IGSF11', 'L1CAM', 'ROBO2', 'CHL1', 'WFIKKN1', 'DSCAM', 'CEACAM5', 'CNTN1', 'CNTN4', 'CNTN6', 'MUSK', 'BSG', 'ROBO4', 'NEGR1', 'GPR116', 'CDON', 'LRIG3', 'PTK7', 'NPHS1', 'NFASC', 'IGSF9', 'NTM', 'PTPRD', 'PSG5', 'FSTL5', 'FLT1', 'JAM3', 'LRIT2', 'MAG', 'DSCAML1', 'CNTN5', 'VCAM1', 'OPCML', 'PXDNL', 'NCAM2', 'PRTG', 'CADM2', 'HSPG2', 'CNTN3', 'NRCAM', 'MDGA2', 'ALCAM', 'MALT1', 'CADM3',…
Ion_trans:53:k	109	76	79	72	6.34527	19456	4.58498e-06	1.81991e-05	245	359	763	40	['KCNC2', 'SCN2A', 'CACNA1E', 'KCNB1', 'KCNS3', 'KCNMA1', 'KCNA7', 'CNGA2', 'SCN9A', 'KCNA10', 'TRPV4', 'KCNB2', 'KCNQ5', 'HCN4', 'KCNQ2', 'TRPM6', 'KCND3', 'SCN3A', 'KCNA5', 'TRPC5', 'KCNV1', 'CACNA1C', 'CNGA1', 'SCN7A', 'SCN10A', 'KCNG4', 'KCNC1', 'KCNC4', 'HVCN1', 'KCNC3', 'TPCN2', 'KCNA3', 'KCNF1', 'CNGA4', 'TRPC6', 'KCNA1', 'ENSG00000254809', 'KCND2', 'TRPA1', 'CNGA3']
p450:62:k	27	11	17	11	7.10016	19456	4.77516e-06	1.89217e-05	463	102	112	8	['CYP2F1', 'CYP2D6', 'CYP11A1', 'CYP26A1', 'CYP2C19', 'CYP2C18', 'CYP7A1', 'CYP3A7']
Ion_trans:88:s	52	29	33	29	5.27753	19456	4.90528e-06	1.94042e-05	245	359	763	19	['KCNH5', 'TRPM6', 'SCN1A', 'CACNA1E', 'SCN11A', 'CACNA1I', 'CACNA1C', 'CACNA1G', 'SCN10A', 'CACNA1A', 'KCNMA1', 'SCN5A', 'CACNA1B', 'SCN3A', 'NALCN', 'CACNA1H', 'KCNB1', 'KCNF1', 'CATSPER3']
PDZ:37:g	61	36	36	36	5.63216	19456	5.31849e-06	2.09675e-05	82	388	700	20	['INADL', 'DFNB31', 'PARD6B', 'STXBP4', 'GRIP1', 'AHNAK', 'PCLO', 'RHPN1', 'TJP1', 'RAPGEF6', 'DLG1', 'MAGI2', 'USH1C', 'HTRA1', 'CASK', 'MPP6', 'DVL1', 'APBA2', 'PDZRN4', 'SYNJ2BP']
zf-C2H2_6:6:e	237	195	181	180	5.74159	19456	5.76298e-06	2.2643e-05	27	782	2521	109	['ZNF530', 'ZNF418', 'ZNF526', 'ZNF135', 'ZNF345', 'ZNF425', 'ZNF43', 'ZNF85', 'ZFP90', 'ZNF184', 'ZNF283', 'ZNF573', 'ZNF780A', 'ZNF500', 'ZNF678', 'ZNF12', 'OSR2', 'ZNF564', 'ZNF157', 'ZNF432', 'ZNF667', 'ZNF75A', 'ZNF208', 'ZNF92', 'ZNF154', 'ZNF671', 'ZNF700', 'ZNF423', 'ZNF417', 'ZNF677', 'ZNF429', 'ZNF549', 'ZNF331', 'ZNF567', 'ZNF721', 'ZNF354C', 'ZNF492', 'ZNF473', 'ZNF763', 'PRDM1', 'ZNF…
Ion_trans:117:r	84	55	59	52	5.96941	19456	5.83875e-06	2.29214e-05	245	359	763	24	['CACNA1E', 'CATSPER4', 'CACNA1I', 'NALCN', 'KCND3', 'SCN3A', 'SCN10A', 'CACNA1S', 'SCN2A', 'SCN9A', 'SCN5A', 'CACNA1H', 'CACNA1C', 'RYR1', 'CACNA1F', 'KCNV1', 'KCND2', 'KCNH4', 'KCNB2', 'CACNA1B', 'KCNS2', 'CACNA1A', 'TPCN1', 'KCNG4']
Filamin:36:k	33	15	26	15	5.9491	19456	5.99674e-06	2.34692e-05	103	28	304	4	['TRIM71', 'FLNB', 'FLNA', 'FLNC']
Lectin_C:27:e	33	15	26	15	6.42224	19456	5.99674e-06	2.34692e-05	108	165	219	15	['CD209', 'MRC2', 'PRG3', 'LAYN', 'LY75', 'CLEC3A', 'MBL2', 'CLEC4M', 'REG1B', 'KLRG1', 'KLRK1', 'SFTPA1', 'CLEC4F', 'NCAN', 'SFTPA2']
Trypsin:126:G	33	15	30	14	6.38967	19456	5.99674e-06	2.34692e-05	221	210	224	21	['MASP1', 'PROC', 'F2', 'TMPRSS5', 'PRSS3', 'TPSD1', 'GZMK', 'OVCH1', 'F7', 'PRSS21', 'CTSG', 'TMPRSS11D', 'ELANE', 'TMPRSS2', 'C1S', 'AZU1', 'KLK11', 'CELA3B', 'TMPRSS11E', 'F10', 'TPSG1']
P53_tetramer:20:e	22	8	11	8	8.85717	19456	6.29013e-06	2.44868e-05	42	27	27	1	['TP53']
ABC_membrane:99:e	22	8	17	8	6.85717	19456	6.29013e-06	2.44868e-05	274	68	108	10	['ABCC1', 'ABCC5', 'ABCB11', 'CFTR', 'ABCB8', 'ABCC2', 'ABCC4', 'ABCB10', 'ABCC11', 'ABCC3']
Pkinase_C:16:e	22	8	15	8	7.44214	19456	6.29013e-06	2.44868e-05	46	72	72	8	['PRKCA', 'RPS6KB2', 'RPS6KA1', 'RPS6KB1', 'RPS6KA4', 'RPS6KA6', 'PRKCB', 'SGK2']
F-box-like:34:v	22	8	7	8	6.9682	19456	6.29013e-06	2.44868e-05	48	102	100	3	['FBXW7', 'FBXO41', 'FBXO44']
Hormone_recep:31:l	22	8	15	8	6.41239	19456	6.29013e-06	2.44868e-05	208	153	147	11	['RARG', 'NR1D1', 'ESRRG', 'NR2F1', 'RXRA', 'NR4A3', 'PGR', 'NR2F2', 'NR2E1', 'PPARD', 'NR1H2']
Cadherin:22:d	242	200	178	191	6.65892	19456	6.29917e-06	2.45015e-05	93	227	1363	79	['FAT3', 'PCDH11Y', 'PCDHB15', 'PCDHA8', 'DSG3', 'PCDHA9', 'PCDHGA6', 'PCDH7', 'PCDH11X', 'DSC2', 'CDH9', 'PCDHA5', 'CDH1', 'PCDHB1', 'DSC3', 'FAT4', 'PCDHA2', 'CDH10', 'PCDHA4', 'CDH2', 'PCDHA1', 'DSG4', 'FAT', 'CDH19', 'PCDHB10', 'PCDHA13', 'PCDH10', 'PCDHB12', 'PCDHB6', 'PCDHA10', 'PCDHGA1', 'PCDHGA7', 'DCHS1', 'PCDHGA9', 'CELSR2', 'PCDHGB3', 'DSC1', 'CDHR4', 'CDH18', 'CDH5', 'PCDH9', 'PCDHB13…
EF-hand_7:15:g	45	24	39	24	6.86312	19456	7.02676e-06	2.72404e-05	71	289	220	21	['TNNC2', 'SLC25A24', 'SLC25A25', 'NCALD', 'CABP5', 'CALB1', 'CIB3', 'CALB2', 'KCNIP2', 'CETN1', 'KCNIP3', 'CABP2', 'HPCAL4', 'NINL', 'MYL7', 'EFHD1', 'PPP3R2', 'EFHD2', 'CAPSL', 'RHBDL3', 'LPCAT2']
Trypsin:204:k	45	24	28	24	6.83713	19456	7.02676e-06	2.72404e-05	221	210	224	21	['HP', 'PRSS3', 'TMPRSS7', 'F10', 'PLG', 'HGFAC', 'CELA3A', 'TPSG1', 'TMPRSS11B', 'TMPRSS4', 'C1RL', 'PRSS50', 'TMPRSS12', 'TMPRSS9', 'PRSS38', 'CTRC', 'KLK3', 'KLKB1', 'PRSS22', 'GZMM', 'PRSS36']
fn3:26:g	109	77	94	75	4.36191	19456	7.13454e-06	2.75435e-05	85	419	3017	40	['TTN', 'SDK2', 'EPHA3', 'DCC', 'MYBPC3', 'PTPRK', 'ROBO1', 'SORL1', 'USH2A', 'IGSF22', 'ROBO2', 'SDK1', 'CNTN4', 'PTPRF', 'FNDC3A', 'MYBPH', 'PTPRO', 'KAL1', 'TRAD', 'EPHA7', 'EPHA4', 'CNTFR', 'CNTN3', 'PTPRH', 'EPHB3', 'ROBO4', 'DSCAM', 'MYOM2', 'NCAM2', 'L1CAM', 'PRTG', 'CSF3R', 'DSCAML1', 'IL6ST', 'TEK', 'IGFN1', 'MYBPC1', 'MYBPC2', 'PTPRD', 'EPHB2']
Pkinase:123:D	79	51	63	50	5.1199	19456	7.29006e-06	2.81205e-05	264	1221	1293	44	['CDK8', 'SGK2', 'STK32B', 'GRK5', 'CAMK4', 'CAMK1G', 'WNK1', 'STK11', 'MAPK4', 'ACVR1B', 'HIPK3', 'CAMK2A', 'PIK3R4', 'CSNK1A1', 'TAOK1', 'STK31', 'CHEK1', 'DYRK3', 'TGFBR1', 'STK17B', 'DMPK', 'MARK1', 'CSNK1G2', 'PAK7', 'PRKG2', 'CSNK1E', 'DCLK1', 'ROCK1', 'CAMK1D', 'LATS2', 'PRKCQ', 'CLK4', 'MAP2K7', 'STK24', 'PRKCI', 'LRRK2', 'RPS6KA2', 'STRADB', 'AMHR2', 'NEK7', 'CLK2', 'GRK1', 'EIF2AK4', 'M…
Laminin_G_2:37:g	41	21	26	21	6.47676	19456	7.48217e-06	2.88138e-05	126	111	262	10	['CNTNAP3', 'CNTNAP2', 'NRXN2', 'NRXN1', 'FAT4', 'CNTNAP4', 'CRB2', 'CNTNAP5', 'LAMA5', 'USH2A']
I-set:52:e	208	168	137	165	4.96129	19456	7.65414e-06	2.9403e-05	90	839	3800	43	['ROBO3', 'FGFR2', 'OPCML', 'TTN', 'FLT1', 'VCAM1', 'SDK2', 'IGSF22', 'MDGA2', 'CNTN3', 'IGFN1', 'HMCN1', 'DCC', 'MYBPC2', 'MYBPC3', 'MYBPC1', 'OBSCN', 'IGDCC4', 'ROBO1', 'LRRC4', 'CNTN4', 'NRCAM', 'SIGLEC1', 'CDON', 'LRRC4B', 'NRG1', 'KDR', 'PTPRF', 'ROBO2', 'PXDN', 'NCAM2', 'HSPG2', 'LRIG1', 'UNC5A', 'PTPRD', 'CNTN2', 'L1CAM', 'IGSF10', 'LSAMP', 'LRRN2', 'CNTN6', 'IGSF9', 'DSCAM']
UDPGT:378:r	25	10	7	10	8.2419	19456	7.73818e-06	2.96524e-05	499	41	47	12	['UGT3A1', 'UGT1A7', 'UGT1A1', 'UGT2B15', 'UGT1A6', 'UGT1A4', 'UGT1A10', 'UGT1A9', 'UGT1A8', 'UGT1A3', 'UGT3A2', 'UGT1A5']
zf-RING_2:41:P	25	10	18	10	5.92612	19456	7.73818e-06	2.96524e-05	44	249	234	12	['ZNRF1', 'RNF24', 'RNF128', 'RNF43', 'TRAIP', 'RNF11', 'DZIP3', 'PHRF1', 'RNF145', 'TTC3', 'RNF165', 'RNF182']
PDEase_I:183:g	25	10	12	10	7.32075	19456	7.73818e-06	2.96524e-05	238	89	89	5	['PDE4B', 'PDE9A', 'PDE4C', 'PDE1A', 'PDE2A']
TIG:16:G	28	12	19	11	6.81024	19456	8.06381e-06	3.08748e-05	85	80	142	4	['EBF3', 'PLXNA4', 'PKHD1L1', 'PKHD1']
Pkinase:28:A	101	70	63	70	5.47433	19456	8.30582e-06	3.1723e-05	264	1221	1293	47	['MKNK2', 'PRKCG', 'AKT2', 'CDKL2', 'SGK1', 'PRKACB', 'NEK6', 'MAP3K15', 'TSSK1B', 'MAPK6', 'OXSR1', 'RIPK4', 'MAPK1', 'STK3', 'MAPK4', 'RPS6KA2', 'PHKG2', 'WNK1', 'CDK5', 'ACVR1B', 'MST4', 'PRKD1', 'DCLK1', 'GAK', 'CSNK1E', 'STK24', 'PRKD2', 'MAP3K4', 'ULK3', 'CSNK1D', 'CDK13', 'MAP3K9', 'LRRK2', 'MAPK13', 'TSSK3', 'MAPK14', 'TNIK', 'EIF2AK2', 'C14orf20', 'VRK2', 'GSK3B', 'MAP4K2', 'TAOK1', 'AKT…
C2:76:s	68	42	48	41	5.93403	19456	8.40851e-06	3.20889e-05	103	325	633	21	['MYOF', 'RIMS2', 'PRKCE', 'CPNE4', 'MCTP1', 'SYT10', 'OTOF', 'CPNE2', 'RASAL2', 'SYT7', 'SYT12', 'WWP1', 'PCLO', 'CPNE6', 'SYT3', 'PRKCG', 'C2CD4D', 'SYT14', 'UNC13C', 'PIK3C2A', 'SYTL3']
BTB_2:61:r	38	19	32	19	8.1911	19456	8.48465e-06	3.23e-05	94	74	74	18	['KCNG3', 'KCTD10', 'KCNG4', 'KCND3', 'KCNRG', 'KCNS1', 'KCND2', 'KCNG1', 'KCNS3', 'KCNV1', 'KCTD7', 'KCNC2', 'KCTD9', 'KCNG2', 'KCTD4', 'KCTD15', 'KCNB2', 'KCNB1']
LIM:16:k	38	19	25	19	5.72813	19456	8.48465e-06	3.23e-05	58	181	408	13	['LMO3', 'LMO2', 'FHL1', 'LHX6', 'FBLIM1', 'ZYX', 'LMCD1', 'LHX2', 'LHX9', 'LDB3', 'LMX1A', 'FHL5', 'JUB']
Nebulin:22:e	64	39	26	39	6.41116	19456	8.49538e-06	3.23144e-05	29	13	428	4	['NEB', 'NEBL', 'NRAP', 'LASP1']
Homeobox:34:A	54	31	50	31	6.19327	19456	9.27486e-06	3.51357e-05	57	381	420	37	['MNX1', 'HOXA4', 'ZFHX2', 'ZFHX4', 'SIX2', 'CUX2', 'ONECUT3', 'SIX6', 'HOXC8', 'PAX4', 'HOXC6', 'SIX3', 'HOXB4', 'ESX1', 'EVX1', 'VAX1', 'UNCX', 'ZHX1', 'HHEX', 'GSX1', 'HOXD3', 'PHOX2B', 'LMX1A', 'ZFHX3', 'HDX', 'DLX5', 'PDX1', 'MEOX1', 'HOXC10', 'HOXD4', 'ZHX2', 'GSC', 'PHOX2A', 'BARHL1', 'HOXB7', 'POU3F4', 'HOXD8']
LRR_8:17:d	144	109	127	106	6.30019	19456	9.32095e-06	3.52816e-05	61	364	1040	67	['LRCH4', 'NYX', 'LRFN1', 'LINGO2', 'SLIT3', 'CNOT6', 'SLITRK5', 'LRTM1', 'LRRC55', 'LRRTM4', 'SLIT1', 'SLIT2', 'PODNL1', 'TLR5', 'SLITRK1', 'BGN', 'CHAD', 'LRRC17', 'PRELP', 'LRRTM2', 'LRIG1', 'LRCH3', 'LRIG2', 'LRRC30', 'LINGO1', 'LRRN4', 'RXFP2', 'LRRC32', 'LRRN3', 'LRRC18', 'LUM', 'LRRC8B', 'LRRC39', 'LRRC7', 'LGI4', 'LRRD1', 'LGR6', 'LRRC3B', 'KERA', 'SHOC2', 'LRRC4B', 'LRRC2', 'LGR5', 'LRCH…
Ig_3:78:s	116	84	81	81	4.64374	19456	1.03206e-05	3.89705e-05	79	936	2641	36	['IGSF10', 'CNTN3', 'CEACAM5', 'DSCAM', 'PSG8', 'ROBO1', 'LRIG2', 'NCAM2', 'CILP2', 'PSG1', 'CNTN5', 'CNTN4', 'HMCN1', 'CD22', 'NTM', 'HSPG2', 'BSG', 'BOC', 'MDGA1', 'PSG2', 'SDK1', 'SIGLEC11', 'NFASC', 'KDR', 'MDGA2', 'JAM2', 'PSG4', 'LRIT2', 'FCRL1', 'DSCAML1', 'PSG5', 'WFIKKN1', 'SDK2', 'IGDCC3', 'IGSF11', 'HEPACAM']
7tm_4:131:l	114	82	110	80	7.15897	19456	1.03735e-05	3.91384e-05	280	469	454	69	['OR52D1', 'OR6C6', 'OR56A4', 'OR4K13', 'OR2C3', 'OR4C15', 'OR10A5', 'OR10K1', 'OR4A16', 'OR4C6', 'OR1A1', 'OR5W2', 'OR5A1', 'OR8B4', 'OR8J3', 'OR7E24', 'OR8B12', 'OR13C8', 'OR1J2', 'OR4S2', 'OR10S1', 'OR6K2', 'OR51F1', 'OR6P1', 'OR10H4', 'OR2G6', 'OR14A16', 'OR10AG1', 'OR51S1', 'OR8D4', 'OR2G3', 'OR5B12', 'OR52N2', 'OR5AN1', 'OR6C2', 'OR4D11', 'OR6A2', 'OR5B21', 'OR8B2', 'OR4D10', 'OR5H1', 'OR2D…
CUB:20:e	72	46	44	44	6.7834	19456	1.07623e-05	4.05065e-05	110	128	372	16	['GPR126', 'DCBLD2', 'TMPRSS15', 'CSMD3', 'TLL2', 'CSMD2', 'MASP1', 'MASP2', 'TLL1', 'NRP1', 'LRP3', 'LRP10', 'KREMEN2', 'CUBN', 'NETO1', 'PCOLCE2']
P53:31:t	65	40	17	39	10.1306	19456	1.09592e-05	4.11811e-05	196	33	33	1	['TP53']
V-set:96:g	56	33	45	32	5.82556	19456	1.18593e-05	4.43483e-05	109	958	562	25	['PVRL1', 'VSTM2A', 'NCR2', 'PTGFRN', 'ESAM', 'BCAM', 'CD2', 'PSG1', 'CD8A', 'PVRL4', 'IGSF3', 'SCN3B', 'PSG8', 'CD79B', 'PDCD1', 'CD48', 'MCAM', 'VSTM2L', 'SIRPA', 'SIGLEC1', 'CD226', 'TREM1', 'SIRPB1', 'BTNL2', 'IGSF21']
Ion_trans:167:e	77	50	49	49	5.84388	19456	1.19986e-05	4.47973e-05	245	359	763	31	['CACNA1I', 'SCN1A', 'SCN3A', 'CACNA1D', 'CACNA1A', 'ITPR2', 'CACNA1E', 'KCNH2', 'CACNA1S', 'KCNQ2', 'TRPC1', 'SCN10A', 'NALCN', 'CATSPER2', 'TRPC6', 'SCN11A', 'SCN8A', 'CNGA4', 'CACNA1G', 'CNGA3', 'KCNC4', 'SCN2A', 'TRPM8', 'SCN5A', 'KCNQ1', 'SCN4A', 'CACNA1H', 'TRPM3', 'TRPM7', 'SCN9A', 'CATSPER1']
Spectrin:37:q	42	22	31	22	5.12499	19456	1.2247e-05	4.56883e-05	105	94	685	10	['SPTBN5', 'SPTBN2', 'SPTB', 'ACTN1', 'DST', 'MACF1', 'TRIO', 'SPTBN1', 'C14orf49', 'ACTN4']
Actin:110:r	23	9	23	9	8.03234	19456	1.24318e-05	4.61922e-05	407	40	50	10	['ACTL7B', 'ACTC1', 'ACTRT1', 'ACTR1B', 'ARPM1', 'POTEF', 'ACTA1', 'ACTBL2', 'ENSG00000188219', 'ACTL9']
Histone:84:r	23	9	21	9	7.722	19456	1.24318e-05	4.61922e-05	132	61	62	10	['HIST1H2BL', 'HIST1H2BE', 'HIST2H2BF', 'HIST1H3J', 'HIST2H2BE', 'H2AFY2', 'HIST1H2BK', 'H2AFV', 'HIST1H2AA', 'HIST1H2BN']
Filaggrin:19:s	23	9	16	9	9.15263	19456	1.24318e-05	4.61922e-05	56	1	23	1	['FLG']
zf-CCCH:8:f	23	9	14	9	6.89483	19456	1.24318e-05	4.61922e-05	27	88	110	5	['ZFP36L2', 'U2AF1L4', 'MBNL3', 'ZFP36L1', 'U2AF1']
7tm_1:221:v	67	42	56	41	5.49933	19456	1.26115e-05	4.68228e-05	268	839	843	40	['GPR55', 'GPR6', 'CXCR3', 'GPR39', 'TAAR1', 'PPYR1', 'AGTR1', 'P2RY6', 'OPN1LW', 'OXTR', 'NMUR1', 'OPRK1', 'P2RY12', 'MTNR1A', 'BRS3', 'CHRM1', 'GHSR', 'HTR7', 'ADRA2A', 'CHRM4', 'NMBR', 'APLNR', 'OPRM1', 'SSTR4', 'CCKBR', 'O3FAR1', 'HTR2B', 'S1PR1', 'EDNRA', 'S1PR3', 'GPR20', 'TACR3', 'OPRL1', 'OXGR1', 'TRHR', 'GPR61', 'GPR3', 'ADRA1D', 'AVPR1A', 'CCR1']
BTB:17:v	29	13	24	13	6.10974	19456	1.2769e-05	4.73316e-05	111	223	239	14	['ZBTB33', 'GZF1', 'CCIN', 'ABTB1', 'KLHL5', 'ZBTB46', 'ZBTB20', 'ZBTB48', 'ZBTB45', 'KLHL14', 'KBTBD3', 'ZBTB10', 'KLHL1', 'KLHL7']
RhoGEF:73:q	26	11	18	11	6.17359	19456	1.33673e-05	4.91967e-05	181	200	205	12	['NET1', 'ARHGEF12', 'FGD4', 'ARHGEF11', 'ARHGEF33', 'ENSG00000214944', 'NP', 'RASGRF1', 'ABR', 'ARHGEF16', 'SOS2', 'PREX2']
p450:421:e	26	11	24	10	7.04571	19456	1.33673e-05	4.91967e-05	463	102	112	16	['CYP4F3', 'CYP26B1', 'CYP2B6', 'CYP17A1', 'CYP2J2', 'CYP4F22', 'CYP2U1', 'CYP3A7', 'CYP7B1', 'CYP2C9', 'CYP4A11', 'CYP11B1', 'CYP4F2', 'CYP19A1', 'CYP11A1', 'CYP7A1']
HLH:8:r	26	11	23	10	6.08488	19456	1.33673e-05	4.91967e-05	55	218	218	19	['HEY1', 'TCF24', 'TCF4', 'TCF15', 'SREBF1', 'HES3', 'NEUROD4', 'TWIST1', 'FERD3L', 'HES4', 'BHLHE23', 'TCF21', 'NEUROG3', 'LYL1', 'BHLHE22', 'NEUROD1', 'ATOH1', 'TCF3', 'NHLH1']
Helicase_C:77:e	26	11	24	11	6.22371	19456	1.33673e-05	4.91967e-05	111	196	198	18	['SRCAP', 'DDX3X', 'DHX15', 'DDX18', 'DDX31', 'DHX58', 'DDX51', 'CHD4', 'YTHDC2', 'DDX49', 'DHX30', 'DDX23', 'DDX58', 'DHX9', 'SMARCA4', 'BLM', 'WRN', 'DDX53']
Hormone_recep:180:R	26	11	21	11	6.6534	19456	1.33673e-05	4.91967e-05	208	153	147	14	['NR2F2', 'ESRRG', 'PGR', 'HNF4A', 'NR5A2', 'NR6A1', 'HNF4G', 'NR1H2', 'AR', 'ESRRA', 'Q8N8C9', 'NR2C2', 'NR2E1', 'RXRB']
Filamin:57:a	26	11	14	11	5.60514	19456	1.33673e-05	4.91967e-05	103	28	304	3	['FLNB', 'FLNA', 'FLNC']
Y_phosphatase:178:s	26	11	12	11	6.31391	19456	1.33673e-05	4.91967e-05	235	152	186	3	['PTPRD', 'PTPRG', 'PTPRH']
V-set:59:k	62	38	52	36	5.9724	19456	1.43915e-05	5.27161e-05	109	958	562	35	['SLAMF6', 'MPZL3', 'VCAN', 'HHLA2', 'IGSF8', 'BCAN', 'BTNL2', 'HAPLN4', 'CEACAM6', 'PVRL3', 'HEPACAM', 'BCAM', 'SIGLEC12', 'CD79B', 'PIGR', 'GPA33', 'CD276', 'VSTM4', 'VSTM2A', 'VSIG2', 'SIGLEC9', 'SIGLEC7', 'BTNL3', 'CD7', 'CD300LF', 'SIRPG', 'PSG6', 'MXRA8', 'BTN2A2', 'VSIG8', 'ESAM', 'PTGFRN', 'VPREB3', 'ERMAP', 'SIGLEC6']
fn3:78:g	169	133	142	129	4.99461	19456	1.45338e-05	5.31954e-05	85	419	3017	49	['TYRO3', 'PTPRB', 'DCC', 'TNXB', 'TNR', 'PTPRD', 'TNC', 'TTN', 'KAL1', 'DSCAM', 'USH2A', 'PTPRF', 'FNDC1', 'IGSF22', 'COL20A1', 'COL14A1', 'SDK2', 'EPHA7', 'NCAM2', 'EPHB2', 'DSCAML1', 'PRTG', 'PTPRU', 'PTPRO', 'CNTN4', 'TRAD', 'CNTN2', 'MYBPC2', 'COL12A1', 'NRCAM', 'TNN', 'MYOM3', 'SDK1', 'CNTN1', 'TEK', 'EPHB1', 'ITGB4', 'GHR', 'CDON', 'ROBO4', 'EPHB3', 'IGDCC3', 'L1CAM', 'EPHA3', 'ANKFN1', 'N…
Pkinase_Tyr:10:G	48	27	39	27	4.43381	19456	1.46981e-05	5.37542e-05	260	1213	1264	22	['ACVR1C', 'TEK', 'KDR', 'MAP3K10', 'MAP3K12', 'TIE1', 'BMPR1B', 'HCK', 'JAK2', 'FLJ23356', 'LCK', 'NTRK1', 'EPHA7', 'BRAF', 'TYK2', 'EPHB1', 'ERBB4', 'ARAF', 'ROS1', 'MET', 'ZAP70', 'MAP3K7']
Ig_3:16:g	132	99	97	97	4.83015	19456	1.48538e-05	5.42384e-05	79	936	2641	48	['NPHS1', 'NFASC', 'CADM2', 'CEACAM1', 'VSIG8', 'PRTG', 'FCRL1', 'DSCAM', 'HSPG2', 'BOC', 'BCAM', 'MUSK', 'FLT4', 'CNTN1', 'NEGR1', 'FSTL5', 'L1CAM', 'PSG4', 'NTM', 'PSG5', 'NCAM2', 'ROBO2', 'VSIG2', 'NRCAM', 'CHL1', 'OPCML', 'IGSF10', 'IGSF11', 'ROBO1', 'CNTN5', 'CEACAM5', 'MDGA2', 'CNTN4', 'HMCN1', 'CNTN3', 'ROBO4', 'CD22', 'KDR', 'SIGLEC11', 'FGFR4', 'ESAM', 'CNTN6', 'DSCAML1', 'GPR116', 'PXDN…
HLH:9:E	36	18	25	18	6.55437	19456	1.48884e-05	5.43222e-05	55	218	218	17	['BHLHE41', 'MITF', 'ATOH7', 'NEUROD1', 'TCF4', 'ARNT2', 'MAX', 'TFAP4', 'TWIST2', 'SOHLH1', 'MESP2', 'NEUROG3', 'HES7', 'FERD3L', 'NEUROD6', 'SOHLH2', 'ARNT']
C2:31:d	58	35	44	31	5.70455	19456	1.50388e-05	5.48279e-05	103	325	633	31	['SYT10', 'SYT9', 'PCLO', 'SYT1', 'SYNGAP1', 'C2CD2', 'CC2D1A', 'SYT13', 'OTOF', 'UNC13A', 'MCTP2', 'SMURF1', 'SYTL5', 'WWP1', 'DYSF', 'UNC13D', 'RIMS1', 'PLCB3', 'ESYT3', 'PRKCG', 'PLCL1', 'PRKCB', 'RIMS3', 'SYTL3', 'CPNE9', 'ESYT2', 'PIK3C2G', 'PLCB4', 'SYT4', 'RPH3A', 'PRF1']
Ion_trans:49:e	80	53	61	52	5.89902	19456	1.53941e-05	5.60356e-05	245	359	763	25	['CACNA1C', 'KCNA1', 'SCN1A', 'SCN11A', 'CACNA1A', 'SCN5A', 'SCN3A', 'CNGA4', 'TRPM3', 'CACNA1D', 'KCNH7', 'KCNG1', 'TRPM1', 'KCNQ1', 'SCN10A', 'CACNA1E', 'CNGA1', 'CACNA1F', 'HCN3', 'NALCN', 'TRPM2', 'HCN4', 'SCN7A', 'KCNH1', 'CACNA1B']
I-set:38:g	216	178	144	167	5.01573	19456	1.66014e-05	6.02885e-05	90	839	3800	46	['OBSCN', 'TTN', 'CNTN2', 'CNTN5', 'L1CAM', 'PRTG', 'NTRK3', 'CNTN4', 'IGFN1', 'MYBPC1', 'NRG1', 'SDK1', 'HMCN1', 'ROBO1', 'KIRREL', 'CNTN3', 'IGSF9', 'PTPRD', 'ROR2', 'DCC', 'IGDCC3', 'ROBO2', 'DSCAML1', 'IGSF22', 'IL1RAPL1', 'MYBPC3', 'NFASC', 'NRCAM', 'KIRREL3', 'MYPN', 'CHL1', 'LSAMP', 'UNC5A', 'PXDNL', 'FLT1', 'HSPG2', 'IGSF10', 'SDK2', 'DSCAM', 'PXDN', 'CNTN1', 'VCAM1', 'MUSK', 'PTK7', 'MYO…
RRM_1:13:e	76	50	55	48	5.67264	19456	1.73586e-05	6.28911e-05	70	540	848	36	['CELF6', 'RBFOX1', 'RBM46', 'RBM39', 'PABPC3', 'NONO', 'U2AF2', 'IGF2BP1', 'CELF1', 'RBMX', 'PTBP2', 'DAZAP1', 'HNRNPH3', 'HNRNPM', 'A1CF', 'RBMS3', 'PABPC4', 'HNRNPCL1', 'PABPC5', 'CIRBP', 'HNRNPA1', 'TIAL1', 'RBM5', 'PABPC1L', 'PTBP1', 'PABPC1', 'RBM3', 'SRSF4', 'ELAVL4', 'RBM19', 'RBM45', 'TRNAU1AP', 'ELAVL2', 'RBM12B', 'HNRNPAB', 'RBM15']
Ig_3:9:s	115	84	85	84	4.63125	19456	1.73746e-05	6.29003e-05	79	936	2641	40	['IGSF9', 'CEACAM5', 'FLT1', 'LRIG1', 'ROBO1', 'CNTN1', 'HEPACAM2', 'SDK1', 'HMCN1', 'VSIG4', 'HSPG2', 'MALT1', 'IGSF10', 'CILP2', 'DSCAML1', 'NTM', 'NCAM2', 'SDK2', 'CNTN4', 'LRIG2', 'KDR', 'LSAMP', 'LRIG3', 'PSG4', 'ROBO2', 'FCRL1', 'PSG5', 'CNTN6', 'MDGA2', 'FLT4', 'PSG2', 'CADM1', 'CNTN3', 'LRRC24', 'CHL1', 'BOC', 'JAM2', 'IGSF9B', 'CNTN5', 'CILP']
Ldl_recept_a:14:e	70	45	67	45	7.04351	19456	1.76815e-05	6.39118e-05	37	82	302	13	['VLDLR', 'LRP1B', 'C6', 'LRP2', 'LRP1', 'CORIN', 'LRP12', 'LRP8', 'LRP5', 'C8B', 'TMPRSS15', 'LRP3', 'LDLR']
CUB:64:g	44	24	26	24	6.0729	19456	1.81847e-05	6.55776e-05	110	128	372	11	['CSMD2', 'PDGFD', 'CSMD3', 'GPR126', 'TLL1', 'TLL2', 'SCUBE2', 'TMPRSS15', 'SEZ6L', 'CUBN', 'KREMEN1']
PDZ:18:g	63	39	41	39	5.6787	19456	1.85964e-05	6.70105e-05	82	388	700	32	['MPDZ', 'LDB3', 'PDLIM7', 'MAGI3', 'APBA1', 'DLG3', 'DLG2', 'RGS12', 'STXBP4', 'SNTG1', 'LIN7B', 'MAGI1', 'LNX2', 'PDZRN3', 'AHNAK', 'PDZD7', 'SCRIB', 'LNX1', 'DLG1', 'SHROOM3', 'MAGI2', 'IL16', 'MPP3', 'MAST1', 'PTPN13', 'GRIP1', 'PDZD3', 'SLC9A3R2', 'TIAM1', 'SDCBP', 'FRMPD2', 'APBA3']
Nebulin:4:E	59	36	25	36	6.29381	19456	1.90424e-05	6.85112e-05	29	13	428	2	['NEB', 'NEBL']
Integrin_alpha2:97:g	21	8	17	8	8.18739	19456	1.97348e-05	7.01347e-05	467	40	41	7	['ITGA2', 'ITGA10', 'ITGAV', 'ITGA8', 'ITGA9', 'ITGA4', 'ITGAE']
ANF_receptor:39:a	21	8	14	8	7.03715	19456	1.97348e-05	7.01347e-05	352	92	91	11	['GRIK3', 'GUCY2F', 'GRIK2', 'GRM7', 'GABBR1', 'GABBR2', 'NPR1', 'GPRC6A', 'GRIK1', 'CASR', 'GRIA1']
Histone:117:R	21	8	19	8	7.59075	19456	1.97348e-05	7.01347e-05	132	61	62	12	['HIST1H2BD', 'H3F3A', 'HIST3H3', 'H2AFY2', 'HIST1H2AC', 'HIST3H2A', 'SOS2', 'HIST1H2AM', 'HIST1H2BE', 'HIST2H2BE', 'H2AFJ', 'HIST1H2BA']
Pkinase_C:45:t	21	8	16	8	7.37502	19456	1.97348e-05	7.01347e-05	46	72	72	8	['AKT1', 'RPS6KA3', 'RPS6KA6', 'PRKCB', 'RPS6KB1', 'AKT2', 'STK38', 'PRKCQ']
Filament:25:q	21	8	20	8	6.87252	19456	1.97348e-05	7.01347e-05	312	104	102	14	['KRT75', 'KRT10', 'KRT31', 'KRT18', 'KRT33A', 'KRT12', 'KRT16', 'KRT39', 'KRT6A', 'INA', 'KRT25', 'BFSP2', 'KRT26', 'KRT40']
DSPc:85:s	21	8	18	7	6.91559	19456	1.97348e-05	7.01347e-05	133	144	99	5	['DUSP4', 'DUSP22', 'TPTE2', 'PTEN', 'DUSP19']
EF-hand_8:9:e	21	8	18	8	5.29228	19456	1.97348e-05	7.01347e-05	54	186	305	10	['GUCA1C', 'CAPN2', 'EFHA2', 'CAPN9', 'CETN1', 'RYR1', 'EFCAB3', 'GUCA1A', 'EFCAB6', 'KCNIP2']
AAA:47:r	21	8	18	8	6.51152	19456	1.97348e-05	7.01347e-05	132	162	131	7	['SPG7', 'ATAD2', 'PSMC4', 'PSMC2', 'KATNAL2', 'KATNAL1', 'BCS1L']
C1-set:31:e	21	8	20	8	5.63206	19456	1.97348e-05	7.01347e-05	89	334	241	15	['SIRPG', 'HLA-A', 'SIRPB1', 'HFE', 'AZGP1', 'HLA-DOB', 'CD1E', 'HLA-F', 'CD1C', 'HLA-B', 'HLA-G', 'SIRPA', 'IGLL1', 'HLA-DQA1', 'HLA-DOA']
HMG_box:42:l	21	8	20	8	6.42601	19456	1.97348e-05	7.01347e-05	69	127	139	9	['BBX', 'HMGB2', 'HMGB4', 'SOX18', 'SOX9', 'SP100', 'SOX4', 'HBP1', 'UBTF']
C2:1:g	21	8	12	8	4.23889	19456	1.97348e-05	7.01347e-05	103	325	633	8	['RIMS2', 'ESYT1', 'PCLO', 'SYT1', 'RIMS4', 'MCTP2', 'MCTP1', 'SYTL4']
Y_phosphatase:64:q	21	8	9	8	6.00579	19456	1.97348e-05	7.01347e-05	235	152	186	5	['PTPRZ1', 'PTPRB', 'PTPRD', 'PTPRJ', 'PTPRU']
RUN:77:r	21	8	13	8	7.76359	19456	1.97348e-05	7.01347e-05	136	51	55	6	['RUFY3', 'RUFY2', 'DENND5B', 'FYCO1', 'RUNDC3A', 'PLEKHM1']
p450:261:e	21	8	19	8	6.73759	19456	1.97348e-05	7.01347e-05	463	102	112	14	['CYP2C19', 'CYP46A1', 'CYP4F11', 'CYP2R1', 'CYP2D6', 'CYP27A1', 'CYP4F22', 'CYP2E1', 'CYP7A1', 'CYP26C1', 'CYP2F1', 'CYP2A7', 'CYP20A1', 'CYP11A1']
RRM_1:21:k	85	58	72	56	5.8341	19456	2.02468e-05	7.18994e-05	70	540	848	44	['HNRNPA0', 'TRA2A', 'RBM15', 'RBMS2', 'TDRD10', 'SF3B4', 'GRSF1', 'RBPMS2', 'SNRNP35', 'SRSF5', 'SPEN', 'ELAVL3', 'RBM45', 'MSI2', 'TIAL1', 'RDBP', 'PABPC3', 'RBM42', 'PABPC1', 'ELAVL4', 'IGF2BP3', 'EIF4B', 'HNRNPM', 'CSTF2', 'HNRPR', 'A1CF', 'ELAVL1', 'PTBP1', 'CELF1', 'RBM46', 'EIF3G', 'CELF3', 'SNRPA', 'RBM41', 'PABPC4', 'PABPC5', 'RBM28', 'FLJ20273', 'U2AF2', 'CPSF6', 'SRSF12', 'RBM47', 'RBM…
Cadherin_2:18:n	49	28	30	28	7.77865	19456	2.03817e-05	7.23233e-05	83	178	127	20	['PCDHA11', 'PCDHA8', 'PCDH11Y', 'PCDHA2', 'PCDH11X', 'PCDHA10', 'PCDHA5', 'PCDHA6', 'PCDHA12', 'PCDHA9', 'PCDH1', 'PCDHA1', 'PCDHA3', 'PCDHA13', 'PCDHGA6', 'PCDHGA1', 'PCDHGA3', 'PCDHA4', 'PCDHB5', 'PCDHGB7']
P53_tetramer:33:E	27	12	14	12	9.15263	19456	2.14756e-05	7.5973e-05	42	27	27	1	['TP53']
Ldl_recept_b:21:G	24	10	24	10	6.3282	19456	2.20799e-05	7.76971e-05	42	28	170	4	['LDLR', 'LRP2', 'LRP4', 'LRP1B']
MFS_1:330:p	24	10	18	10	5.77181	19456	2.20799e-05	7.76971e-05	353	229	250	11	['SLC46A3', 'SLC17A9', 'SLC16A6', 'SLC17A3', 'SLC43A3', 'MFSD9', 'SLC22A25', 'SLC18A1', 'SLC17A7', 'MFSD1', 'SLC22A9']
Filamin:77:s	24	10	14	10	5.48966	19456	2.20799e-05	7.76971e-05	103	28	304	3	['FLNA', 'FLNB', 'FLNC']
FAM47:254:r	24	10	16	10	9.09374	19456	2.20799e-05	7.76971e-05	257	7	25	3	['FAM47C', 'FAM47B', 'FAM47A']
Forkhead:33:k	24	10	17	10	7.43381	19456	2.20799e-05	7.76971e-05	82	78	79	10	['FOXM1', 'FOXD2', 'FOXK1', 'FOXR2', 'FOXD4', 'FOXS1', 'FOXD4L3', 'FOXD4L5', 'FOXQ1', 'FOXP2']
Filament:283:r	30	14	30	14	7.38709	19456	2.28152e-05	8.01635e-05	312	104	102	16	['KRT72', 'KRT74', 'KRT8', 'KRT76', 'KRT7', 'VIM', 'INA', 'NEFM', 'KRT3', 'KRT33A', 'KRT79', 'DES', 'KRT81', 'KRT71', 'KRT77', 'KRT5']
fn3:83:p	100	71	81	70	4.23759	19456	2.29589e-05	8.04858e-05	85	419	3017	36	['BOC', 'DSCAML1', 'CNTN3', 'EPHA3', 'CNTN5', 'EGFLAM', 'DSCAM', 'TTN', 'MYBPC2', 'MYOM3', 'ITGB4', 'TNXB', 'MYOM2', 'SDK1', 'FNDC3A', 'IGFN1', 'PTPRM', 'EPHA2', 'ROBO2', 'CNTN4', 'PTPRD', 'TNR', 'DCC', 'CHL1', 'MYOM1', 'COL12A1', 'PTPRK', 'EPHA4', 'SDK2', 'CNTN6', 'NRCAM', 'TEK', 'IGDCC4', 'CNTN1', 'NCAM2', 'COL7A1']
Pkinase:215:k	37	19	27	19	4.02558	19456	2.43954e-05	8.53932e-05	264	1221	1293	18	['MAP3K3', 'PIK3R4', 'AMHR2', 'HIPK3', 'YSK4', 'MAPK10', 'MAP2K4', 'CDK14', 'CDK19', 'MAPK8', 'STK10', 'MAP3K2', 'ACVR2B', 'CSNK2A2', 'MAPK11', 'MAP4K3', 'MYO3B', 'CDKL2']
Helicase_C:63:n	37	19	25	19	6.73273	19456	2.43954e-05	8.53932e-05	111	196	198	15	['DDX60', 'DDX4', 'DICER1', 'DDX17', 'RAD54L2', 'EIF4A2', 'DHX33', 'FANCM', 'IFIH1', 'CHD4', 'DDX41', 'DHX36', 'DHX35', 'CHD7', 'SKIV2L2']
VWA:48:e	33	16	22	16	6.24283	19456	2.54992e-05	8.90557e-05	175	144	248	13	['COL6A3', 'MATN4', 'VIT', 'FLJ35880', 'ITIH1', 'COCH', 'MATN2', 'COL6A6', 'ANTXR1', 'ITGA11', 'COL6A2', 'COL12A1', 'COL14A1']
Ldl_recept_a:2:t	46	26	44	25	6.43779	19456	2.5635e-05	8.94628e-05	37	82	302	13	['LRP1B', 'LRP3', 'C8B', 'LRP4', 'NETO2', 'LDLR', 'LRP1', 'LRP2', 'TMPRSS9', 'LRP12', 'ST14', 'RXFP2', 'LRP11']
P53:153:m	105	76	29	75	10.8225	19456	2.58126e-05	9.00152e-05	196	33	33	2	['TP63', 'TP53']
EF-hand_7:43:d	38	20	32	20	6.6192	19456	2.61577e-05	9.11503e-05	71	289	220	20	['CABP7', 'KCNIP1', 'PPP2R3A', 'CALML5', 'EFCAB7', 'CABP4', 'GUCA1C', 'PPEF1', 'EFHD2', 'LPCAT2', 'MYL12A', 'EFCAB1', 'RCVRN', 'PPP3R2', 'PLS1', 'CALML3', 'PPEF2', 'CAPSL', 'MYL7', 'P4HTM']
Cadherin_tail:104:a	34	17	2	17	8.84777	19456	2.64098e-05	9.16853e-05	133	42	42	19	['PCDHGC3', 'PCDHGB7', 'PCDHGB2', 'PCDHG', 'PCDHGA6', 'PCDHGB1', 'PCDHGA7', 'PCDHGA3', 'PCDHGA5', 'PCDHGB6', 'PCDHGB3', 'PCDHGB4', 'PCDHGA1', 'PCDHGA9', 'PCDHGA12', 'PCDHGA8', 'PCDHGC4', 'PCDHGC5', 'PCDHGA11']
Pkinase_Tyr:176:E	34	17	22	17	3.93631	19456	2.64098e-05	9.16853e-05	260	1213	1264	18	['AATK', 'LIMK1', 'TNK2', 'FGFR1', 'NTRK1', 'SRMS', 'ABL2', 'ACVR1C', 'ROS1', 'RIPK1', 'ERBB4', 'EPHA7', 'GUCY2C', 'ZAP70', 'ALK', 'FGFR4', 'MET', 'EPHA1']
Ig_3:58:s	137	105	109	102	4.88379	19456	2.64374e-05	9.17129e-05	79	936	2641	44	['FCRL1', 'VSIG1', 'CNTN4', 'PVRL4', 'CNTN6', 'IGDCC3', 'HSPG2', 'DSCAML1', 'PTPRD', 'HMCN1', 'NFASC', 'BSG', 'KIRREL3', 'IGLON5', 'FGFR2', 'DSCAM', 'MDGA1', 'IGSF10', 'NTM', 'SDK2', 'MDGA2', 'VCAM1', 'SDK1', 'ROBO3', 'NRCAM', 'SIGLEC12', 'ROBO2', 'PXDNL', 'CDON', 'CNTN2', 'CNTN5', 'WFIKKN1', 'CEACAM6', 'PRTG', 'PSG5', 'SIGLEC11', 'KDR', 'FLT1', 'LSAMP', 'OBSL1', 'VSIG2', 'L1CAM', 'NPHS1', 'CEACA…
Mito_carr:32:r	51	30	42	30	6.79715	19456	2.65668e-05	9.20928e-05	97	100	261	24	['SLC25A24', 'SLC25A18', 'UCP1', 'SLC25A22', 'SLC25A39', 'SLC25A44', 'SLC25A23', 'SLC25A42', 'MCART1', 'SLC25A48', 'UCP2', 'SLC25A10', 'SLC25A1', 'SLC25A20', 'SLC25A12', 'UCP3', 'SLC25A30', 'SLC25A31', 'SLC25A37', 'SLC25A3', 'MTCH1', 'MCART2', 'SLC25A13', 'SLC25A33']
7tm_4:203:e	183	148	158	143	7.84178	19456	2.7162e-05	9.4016e-05	280	469	454	111	['OR10A5', 'OR6S1', 'OR5B12', 'OR4C11', 'OR5D18', 'OR4C46', 'OR1A1', 'OR5M11', 'OR52E8', 'OR7G3', 'OR4N2', 'OR10A2', 'OR5B2', 'OR7D2', 'OR5T3', 'OR51E1', 'OR4D9', 'OR8H1', 'OR56B4', 'OR5A2', 'OR9K2', 'OR11H1', 'OR51S1', 'OR1F1', 'OR6N1', 'OR1L1', 'OR13C2', 'OR8B2', 'OR5A1', 'OR1J2', 'OR52L1', 'OR2AT4', 'OR10G7', 'OR8B3', 'OR2L2', 'OR8J3', 'OR52N1', 'OR51G2', 'OR4A15', 'OR13A1', 'OR8J1', 'OR2L3', …
C2:24:p	62	39	42	37	5.80076	19456	2.82593e-05	9.76687e-05	103	325	633	35	['PIK3C2A', 'PRKCB', 'PCLO', 'UNC13C', 'PRKCG', 'ESYT2', 'ESYT3', 'MYOF', 'SYT7', 'SMURF2', 'OTOF', 'RASA1', 'TC2N', 'MCTP1', 'SYT17', 'PLA2G4D', 'PLCZ1', 'DYSF', 'PLA2G4A', 'SYTL2', 'SYTL5', 'SYT5', 'RIMS1', 'RASA2', 'SYTL4', 'CPNE8', 'ESYT1', 'RIMS2', 'HECW1', 'C2CD4D', 'SYT4', 'SYT2', 'PLCH2', 'BAIAP3', 'SYT1']
BTB_2:88:e	31	15	23	15	7.89737	19456	2.90434e-05	0.000100007	94	74	74	16	['KCND3', 'KCTD3', 'KCTD15', 'KCNC4', 'KCTD11', 'KCNA1', 'KCND2', 'KCNA6', 'KCTD8', 'KCTD4', 'KCNB2', 'KCNC2', 'KCTD6', 'KCTD13', 'KCNB1', 'KCNV1']
ABC_tran:116:r	31	15	26	15	6.4995	19456	2.90434e-05	0.000100007	137	141	195	17	['ABCF1', 'ABCB1', 'ABCG1', 'ABCB10', 'CFTR', 'ABCA6', 'ABCA2', 'ABCA10', 'ABCB11', 'ABCC3', 'ABCG2', 'ABCF3', 'ABCC4', 'ABCB5', 'ABCC2', 'ABCC8', 'ABCA3']
Filamin:75:t	31	15	22	15	5.8589	19456	2.90434e-05	0.000100007	103	28	304	4	['FLNC', 'FLNB', 'FLNA', 'TRIM2']
7tm_1:97:r	114	84	92	80	6.26613	19456	2.91081e-05	0.000100156	268	839	843	60	['OPRM1', 'EDNRB', 'OPRK1', 'GPR162', 'NPBWR2', 'CCR9', 'PTGER3', 'P2RY10', 'ADRA2C', 'ADORA1', 'P2RY8', 'GPR151', 'AVPR1A', 'GPR171', 'GPR15', 'GPR45', 'GPR55', 'P2RY2', 'SSTR2', 'ADRA2A', 'PTAFR', 'HTR2C', 'MTNR1B', 'LPAR2', 'HCRTR1', 'GPR26', 'P2RY1', 'APLNR', 'P2RY6', 'GPR152', 'CYSLTR2', 'MRGPRF', 'CCKBR', 'GPR31', 'GPR39', 'NMBR', 'NPY2R', 'BDKRB2', 'ADRA1D', 'GPR75', 'FPR3', 'O3FAR1', 'PTG…
EGF:25:p	61	38	43	37	5.96702	19456	3.15372e-05	0.000108354	32	245	555	19	['CRB1', 'NOTCH2', 'DLL3', 'NOTCH1', 'CELSR3', 'CRB2', 'DNER', 'SLIT1', 'CELSR1', 'SNED1', 'NOTCH3', 'LRP1B', 'SLIT3', 'PTGS2', 'SLIT2', 'HSPG2', 'VWA2', 'NOTCH4', 'PTGS1']
Ion_trans:29:e	88	61	53	60	6.03652	19456	3.17057e-05	0.000108852	245	359	763	29	['CACNA1C', 'SCN2A', 'CACNA1I', 'KCNH1', 'KCNH2', 'SCN1A', 'KCND2', 'SCN5A', 'KCNH4', 'KCNH3', 'TRPV1', 'KCNS2', 'ITPR3', 'KCNQ2', 'CACNA1D', 'KCNH5', 'TPCN2', 'CACNA1B', 'NALCN', 'KCND3', 'HCN2', 'KCNG4', 'CACNA1E', 'CNGA1', 'SCN7A', 'KCNMA1', 'CACNA1H', 'KCNH6', 'SCN4A']
Sushi:16:k	90	63	62	61	5.98627	19456	3.19904e-05	0.000109749	56	146	808	22	['CD55', 'CSMD3', 'CSMD2', 'CFH', 'KIAA0247', 'SELE', 'SEZ6L2', 'CR2', 'SRPX2', 'SEZ6L', 'CFHR2', 'C4BPA', 'CFHR4', 'C7', 'NCAN', 'CR1L', 'CFHR5', 'CFHR3', 'APOH', 'F13B', 'C6', 'BCAN']
I-set:7:l	142	110	101	109	4.41059	19456	3.2235e-05	0.000110506	90	839	3800	37	['TTN', 'ROBO2', 'FGFRL1', 'CNTN1', 'NTM', 'SDK2', 'DCC', 'IGSF10', 'DSCAM', 'LRRC4C', 'PXDN', 'HMCN1', 'OBSCN', 'UNC5C', 'CNTN5', 'MYPN', 'LRIG3', 'PXDNL', 'DSCAML1', 'OPCML', 'NRG1', 'NCAM2', 'MDGA2', 'KIRREL3', 'IGDCC4', 'CHL1', 'OBSL1', 'ROR1', 'CNTN4', 'PRTG', 'CNTN6', 'CNTN3', 'MYBPC2', 'MYBPC3', 'LRRN3', 'HSPG2', 'LRRC4']
Pkinase_Tyr:201:t	43	24	36	24	4.27511	19456	3.24892e-05	0.000111296	260	1213	1264	23	['FGFR3', 'BTK', 'TESK2', 'INSRR', 'ACVR1C', 'TYK2', 'ERBB2', 'KDR', 'ALK', 'MUSK', 'ACVRL1', 'MATK', 'EPHA8', 'MAP3K10', 'EPHA7', 'ERBB4', 'MET', 'PDGFRA', 'FGR', 'AATK', 'AXL', 'TEC', 'TESK1']
KH_1:46:r	42	23	40	23	6.67458	19456	3.26824e-05	0.000111875	66	101	234	14	['MEX3A', 'HDLBP', 'PCBP3', 'MEX3C', 'FMR1', 'NOVA1', 'IGF2BP1', 'HNRNPK', 'NOVA2', 'DDX43', 'PCBP4', 'FUBP3', 'BICC1', 'PCBP2']
SRCR:93:e	47	27	34	27	6.6304	19456	3.58835e-05	0.000122293	100	56	270	10	['SRCRB4D', 'DMBT1', 'CD163L1', 'CD5L', 'CD163', 'SCARA5', 'PRSS12', 'LOXL2', 'SSC5D', 'LOXL3']
CH:73:e	25	11	16	11	5.71967	19456	3.60945e-05	0.000122832	109	187	270	12	['LRCH1', 'SMTN', 'SMTNL2', 'IQGAP2', 'LRCH4', 'MAPRE2', 'FLNB', 'ACTN1', 'CNN3', 'GAS2', 'PARVB', 'MICAL1']
p450:415:e	25	11	23	11	6.98913	19456	3.60945e-05	0.000122832	463	102	112	14	['PTGIS', 'CYP7B1', 'CYP4F3', 'CYP27A1', 'CYP26A1', 'CYP4A11', 'CYP11B2', 'CYP11A1', 'CYP2C9', 'CYP3A43', 'CYP2W1', 'CYP4B1', 'CYP1A1', 'CYP2C18']
Pep_M12B_propep:98:s	22	9	16	9	7.01215	19456	3.62903e-05	0.000123048	140	97	97	13	['ADAMDEC1', 'ADAM11', 'ADAMTS12', 'ADAM2', 'ADAMTS5', 'ADAM28', 'ADAMTS18', 'ADAM29', 'ADAM18', 'ADAM23', 'ADAMTS8', 'ADAMTS15', 'ADAMTS4']
Cadherin_C_2:76:s	22	9	13	9	7.40261	19456	3.62903e-05	0.000123048	85	86	74	10	['PCDHB13', 'PCDHGA3', 'PCDHGA1', 'PCDHGA6', 'PCDHAC2', 'PCDHB2', 'PCDHGB6', 'PCDHGA12', 'PCDHB5', 'PCDHGA5']
TAS2R:277:p	22	9	22	9	8.65786	19456	3.62903e-05	0.000123048	303	31	31	6	['TAS2R10', 'TAS2R38', 'TAS2R3', 'TAS2R39', 'TAS2R1', 'TAS2R46']
Kinesin:286:R	22	9	18	9	6.88414	19456	3.62903e-05	0.000123048	333	104	106	13	['KIF13A', 'KIF12', 'KIF23', 'KIF1C', 'KIF5A', 'KIF13B', 'KIF3A', 'KIF9', 'KIF25', 'KIF11', 'KIF7', 'CENPE', 'KIF20A']
7tm_3:176:e	22	9	14	9	8.05747	19456	3.62903e-05	0.000123048	234	47	47	6	['GRM7', 'GABBR1', 'GRM1', 'GRM3', 'GRM6', 'GRM5']
LRR_8:41:s	159	126	134	122	6.44314	19456	3.75886e-05	0.00012708	61	364	1040	58	['SHOC2', 'LRRC3', 'CPN2', 'LRRTM1', 'RSU1', 'LRRC4B', 'Q7Z2Q7', 'LRRC28', 'LRIG1', 'LINGO2', 'GP1BA', 'RXFP2', 'FLRT2', 'IGFALS', 'LGI4', 'LRRC40', 'LRRC17', 'SLIT2', 'TPBG', 'LRRTM2', 'NCRNA00174', 'LRRC2', 'LRRC10', 'LRRIQ4', 'LINGO4', 'PIDD', 'LRG1', 'LRRTM3', 'KERA', 'ISLR2', 'LGR6', 'LINGO1', 'LRTM2', 'SLITRK6', 'ISLR', 'LRRN3', 'SLITRK1', 'PXDN', 'PXDNL', 'LRRC47', 'LRRC52', 'SLIT1', 'PODN…
Pkinase:173:e	86	60	58	56	5.24239	19456	3.84052e-05	0.000129746	264	1221	1293	41	['MARK1', 'NEK10', 'MAP3K15', 'PHKG2', 'MARK2', 'STK17B', 'WEE2', 'STK33', 'BMP2K', 'WNK4', 'PASK', 'CHUK', 'PRKACB', 'MAP4K3', 'SIK1', 'RPS6KB2', 'CAMK2G', 'PAK3', 'MAP3K6', 'RPS6KA2', 'PDPK1', 'MAPK7', 'TSSK1B', 'CDK14', 'DYRK3', 'PAK4', 'AURKB', 'CSNK2A2', 'CAMKV', 'LRRK2', 'CDC42BPG', 'NEK6', 'STK32C', 'PRKG1', 'EIF2AK3', 'MAPK1', 'CDK15', 'STK32B', 'CDK19', 'STK25', 'VRK3']
Ig_3:27:g	113	84	84	80	4.60594	19456	3.85e-05	0.000129972	79	936	2641	38	['ROBO2', 'CNTN1', 'SDK1', 'PRTG', 'IGSF10', 'PXDNL', 'CEACAM5', 'HMCN1', 'LRIG1', 'JAM3', 'CNTN4', 'FLT1', 'DSCAM', 'KDR', 'FCRL1', 'CEACAM8', 'OBSL1', 'IGSF9', 'FGFR3', 'CNTN5', 'HSPG2', 'PTK7', 'CADM2', 'CD22', 'MDGA2', 'CNTN2', 'NEO1', 'CNTN6', 'NFASC', 'JAM2', 'ROBO1', 'PTPRD', 'VSIG8', 'FSTL5', 'LRIG3', 'FGFR4', 'WFIKKN1', 'MUSK']
zf-C2H2_6:19:g	232	196	200	183	5.71083	19456	4.04634e-05	0.000136403	27	782	2521	107	['ZNF530', 'ZNF383', 'ZSCAN5B', 'ZNF283', 'ZNF417', 'ZBTB41', 'ZNF700', 'PRDM16', 'ZNF878', 'ZNF85', 'ZFP30', 'ZNF678', 'ZNF208', 'RREB1', 'ZNF546', 'ZNF267', 'ZNF568', 'ZNF71', 'ZNF317', 'PRDM2', 'ZNF345', 'ZNF416', 'ZNF791', 'ZFP37', 'ZNF480', 'ZNF486', 'ZNF323', 'ZNF250', 'ZNF181', 'ZNF135', 'ZNF627', 'ZNF429', 'ZNF418', 'ZNF780B', 'ZNF490', 'ZNF574', 'ZNF445', 'ZBTB16', 'ZNF737', 'ZNF790', 'Z…
ABC_membrane:103:r	28	13	17	12	7.2051	19456	4.14376e-05	0.000139082	274	68	108	8	['ABCC4', 'ABCC9', 'ABCC6', 'ABCB11', 'ABCB1', 'TAP2', 'ABCC11', 'ABCB4']
p450:300:r	28	13	26	13	7.15263	19456	4.14376e-05	0.000139082	463	102	112	16	['CYP2C8', 'CYP4X1', 'CYP4Z1', 'CYP3A7', 'CYP4V2', 'CYP2C19', 'CYP4F22', 'CYP11B1', 'PTGIS', 'CYP7B1', 'CYP26B1', 'CYP26A1', 'CYP2C9', 'CYP2A13', 'CYP19A1', 'CYP11A1']
Helicase_C:61:q	28	13	25	13	6.33063	19456	4.14376e-05	0.000139082	111	196	198	21	['SMARCA2', 'EP400', 'DDX51', 'DDX19A', 'SKIV2L2', 'DHX36', 'DDX41', 'DHX35', 'DDX10', 'DDX60', 'CHD7', 'CHD1', 'DDX27', 'DDX1', 'EIF4A3', 'CHD6', 'DDX28', 'EIF4A1', 'YTHDC2', 'CHD4', 'EIF4A2']
TPR_8:20:A	28	13	25	13	5.03814	19456	4.14376e-05	0.000139082	34	198	485	17	['TTC28', 'IFIT3', 'TOMM70A', 'STIP1', 'PEX5L', 'SRP72', 'XAB2', 'TTC17', 'IFIT1B', 'TTC37', 'CTR9', 'IFT88', 'TTC7B', 'TMTC3', 'DNAJC7', 'TMTC1', 'IFIT1']
C1-set:72:s	28	13	24	13	6.04709	19456	4.14376e-05	0.000139082	89	334	241	9	['HLA-DRB1', 'CD1A', 'HLA-DPB1', 'B2M', 'HHLA2', 'HLA-F', 'HLA-DRB5', 'HLA-DQA2', 'SIRPG']
7tm_1:155:l	78	53	65	52	5.71864	19456	4.15554e-05	0.000139377	268	839	843	38	['OPRD1', 'GPR161', 'OPN1LW', 'MCHR2', 'OPN5', 'ADRA2A', 'GHSR', 'CXCR7', 'CNR1', 'GPR18', 'GPR55', 'GPR150', 'CCRL1', 'ADRA2C', 'GPR31', 'MC1R', 'HCRTR2', 'GPR15', 'MC5R', 'GPR174', 'GRPR', 'NPFFR2', 'OPN4', 'GPR35', 'CHRM3', 'F2RL3', 'P2RY4', 'CXCR1', 'GPR50', 'GPR119', 'OPRL1', 'AVPR1A', 'HRH3', 'GPR87', 'UTS2R', 'GPR88', 'GPR171', 'GPR34']
fn3:22:p	167	134	121	127	4.97743	19456	4.34169e-05	0.000145097	85	419	3017	44	['PTPRD', 'TTN', 'PTPRB', 'SDK1', 'EPHB2', 'EPHA3', 'IGFN1', 'NFASC', 'EGFLAM', 'FN1', 'TNC', 'FNDC3B', 'DCC', 'PTPRM', 'COL12A1', 'MYBPC2', 'IL6ST', 'TNXB', 'FNDC3A', 'USH2A', 'ANKFN1', 'CNTN3', 'IGSF9', 'BOC', 'IGDCC4', 'COL14A1', 'PRTG', 'SDK2', 'TNN', 'PTPRU', 'NCAM2', 'COL7A1', 'NRCAM', 'CNTN2', 'ITGB4', 'ABI3BP', 'TRIM9', 'SNED1', 'TNR', 'GHR', 'PTPRF', 'KAL1', 'EPHA5', 'DSCAML1']
Kelch_1:18:G	44	25	37	25	5.94318	19456	4.49396e-05	0.000149971	46	122	407	22	['KLHL33', 'KLHL6', 'KLHL26', 'KLHL14', 'KEAP1', 'KLHL4', 'KLHL1', 'KLHL25', 'KLHDC5', 'KBTBD7', 'KLHL10', 'KLHL36', 'KLHL3', 'IVNS1ABP', 'KLHL18', 'KLHL15', 'KLHDC7B', 'KBTBD3', 'KLHL17', 'KLHL12', 'KLHL8', 'ATRN']
SH2:44:g	49	29	31	28	6.86045	19456	4.57069e-05	0.000152422	77	215	240	13	['SYK', 'ITK', 'SHD', 'PIK3R2', 'SH2D4A', 'SLA2', 'TNS1', 'PTPN11', 'PIK3R1', 'HCK', 'LCP2', 'DAPP1', 'SHE']
Sushi:22:g	115	86	81	83	6.33991	19456	4.65397e-05	0.000155088	56	146	808	23	['C6', 'CSMD3', 'CR2', 'CSMD2', 'SRPX', 'SEZ6', 'C4BPB', 'CD55', 'SUSD4', 'PAPPA', 'CFH', 'CR1', 'SEZ6L2', 'CFHR2', 'APOH', 'CFB', 'CFHR5', 'F13B', 'PAPPA2', 'CR1L', 'CFHR1', 'C4BPA', 'SEZ6L']
EF-hand_7:52:c	32	16	24	16	6.37127	19456	4.74578e-05	0.000158034	71	289	220	13	['CABP5', 'CALN1', 'CALML6', 'PPP2R3A', 'MACF1', 'CETN2', 'P4HTM', 'EFHD1', 'CALM3', 'CALML5', 'NCS1', 'CETN3', 'CETN1']
I-set:48:k	220	185	173	174	5.04221	19456	4.75026e-05	0.00015807	90	839	3800	44	['TTN', 'HMCN1', 'OBSCN', 'PXDNL', 'DSCAM', 'ROBO1', 'NTM', 'FLT1', 'BOC', 'CNTN6', 'DCC', 'CNTN1', 'AMIGO1', 'IGSF22', 'ROBO3', 'IL1RL1', 'CNTN5', 'ROR1', 'MYBPC2', 'EMB', 'MYBPC3', 'LSAMP', 'FGFR2', 'SDK2', 'CNTN4', 'PRTG', 'FGFR1', 'PXDN', 'ALPK2', 'LINGO1', 'MYBPC1', 'ROBO2', 'CNTN3', 'NCAM2', 'NFASC', 'L1CAM', 'CHL1', 'ADAMTSL3', 'OPCML', 'LRIG3', 'MYOM2', 'HSPG2', 'UNC5D', 'SDK1']
zf-C2H2:5:d	332	295	280	269	5.83288	19456	4.79865e-05	0.000159566	23	1207	3315	169	['ZNF41', 'ZNF16', 'ZNF792', 'ZNF234', 'ENSG00000221895', 'ZNF624', 'ZNF345', 'ZNF642', 'ZNF121', 'ZNF425', 'ZNF225', 'ZNF711', 'ZNF485', 'ZFP90', 'ZNF419', 'ZNF184', 'ZNF500', 'ZNF12', 'FEZF1', 'ZNF697', 'ZNF157', 'ZNF610', 'ZNF484', 'ZNF783', 'ZNF528', 'ZNF432', 'MZF1', 'ZNF75A', 'ZFP37', 'ZNF572', 'ZNF92', 'ZNF454', 'ZNF154', 'ZNF134', 'ZNF304', 'ZNF167', 'ZNF700', 'ZSCAN21', 'ZNF436', 'ZNF775…
7tm_4:36:l	79	54	77	52	6.62986	19456	4.87486e-05	0.000161869	280	469	454	61	['OR2G2', 'OR10G3', 'OR52E2', 'OR6C76', 'OR4N5', 'OR5D16', 'OR1L3', 'OR6K2', 'OR14A2', 'OR4C12', 'OR6B3', 'OR2AJ1', 'OR1G1', 'OR51A7', 'OR6C74', 'OR5AS1', 'OR5T3', 'OR4C6', 'OR2G3', 'OR4M1', 'OR4K17', 'OR6X1', 'OR5B12', 'OR2K2', 'OR4K1', 'OR6N2', 'OR4L1', 'OR52J3', 'OR10A2', 'OR51L1', 'OR51S1', 'OR52E8', 'OR2B3', 'OR5C1', 'OR1N1', 'OR6N1', 'OR4A16', 'OR10H5', 'OR4Q3', 'OR10A4', 'OR4C13', 'OR4N4',…
Pkinase:94:s	74	50	49	49	5.02558	19456	4.88431e-05	0.000161952	264	1221	1293	37	['CLK3', 'CAMKK2', 'TSSK1B', 'MAST1', 'NUAK1', 'TAOK3', 'BRSK1', 'STRADB', 'CDK14', 'MELK', 'RIPK3', 'TSSK3', 'PIM1', 'BRSK2', 'LIMK2', 'MAP3K2', 'CAMKV', 'CAMK4', 'TSSK4', 'DYRK1A', 'HUNK', 'MINK1', 'MYO3B', 'AKT3', 'YSK4', 'MYLK2', 'NUAK2', 'MAST4', 'RPS6KA6', 'MAP3K5', 'ACVR1', 'SNRK', 'C14orf20', 'TTBK1', 'TTK', 'PRKG1', 'PRKACG']
Ion_trans:231:a	74	50	50	48	5.78654	19456	4.88431e-05	0.000161952	245	359	763	33	['SCN3A', 'CNGA2', 'SCN2A', 'CACNA1C', 'SCN1A', 'TRPC5', 'RYR1', 'KCNH7', 'TRPM4', 'KCNS2', 'TRPM5', 'KCNH4', 'TRPV2', 'SCN11A', 'CACNA1A', 'KCNH2', 'CACNA1H', 'KCNQ2', 'TPCN1', 'KCNH5', 'SCN4A', 'KCNQ1', 'CACNA1E', 'KCND3', 'TRPM2', 'CACNA1I', 'NALCN', 'KCNB1', 'KCNH1', 'KCNA3', 'SCN9A', 'CACNA1D', 'KCNG2']
Pkinase:97:e	88	62	57	61	5.27555	19456	4.97275e-05	0.000164532	264	1221	1293	48	['CHUK', 'STK31', 'LRRK2', 'PRKCG', 'CDC42BPA', 'MYO3A', 'STK4', 'DCLK3', 'MAPK8', 'PAK3', 'CDK8', 'MAPK14', 'ERN2', 'STK17A', 'PIM3', 'ROCK2', 'MARK2', 'PRKD2', 'STK25', 'CDKL4', 'PIM1', 'RPS6KA3', 'CDK9', 'MAPK9', 'CDK16', 'CAMK1D', 'CDK20', 'CDK14', 'LATS2', 'VRK1', 'MAP2K7', 'HIPK4', 'TTK', 'TAOK2', 'CAMK1', 'PAK7', 'PNCK', 'RIPK4', 'CDK5', 'DAPK1', 'SBK1', 'PRKCB', 'STK33', 'MAP3K9', 'STK32A…
Pkinase:165:A	88	62	56	61	5.27555	19456	4.97275e-05	0.000164532	264	1221	1293	40	['STRADB', 'RPS6KA3', 'ACVR1B', 'TNIK', 'MAP2K1', 'CDK7', 'MAP3K1', 'PAK4', 'MAPK15', 'CDK15', 'TGFBR1', 'DAPK1', 'CDK13', 'PRKCB', 'PRKACA', 'MAP2K4', 'ACVR2A', 'PASK', 'PAK2', 'MAP2K5', 'WNK4', 'MAST1', 'CAMK2G', 'MAPK9', 'TRIO', 'CDK9', 'PIM3', 'TRAD', 'MAP2K7', 'CHUK', 'PRKCA', 'MAP4K3', 'TTK', 'LIMK2', 'MAP2K3', 'IRAK1', 'LATS1', 'RPS6KA1', 'EIF2AK3', 'CAMK4']
cEGF:9:G	29	14	23	14	5.97169	19456	5.06047e-05	0.000167197	24	136	263	10	['FBN1', 'FBLN5', 'SCUBE3', 'FBN2', 'LTBP1', 'FBLN2', 'MATN2', 'CD93', 'LTBP3', 'EMR1']
Ank_4:31:d	29	14	25	14	3.38947	19456	5.06047e-05	0.000167197	55	519	1575	8	['RIPK4', 'TNKS2', 'TNKS', 'ANKRD42', 'ANKRD53', 'ANKFY1', 'ANKRD40', 'ASB2']
RRM_1:42:a	73	49	62	49	5.61453	19456	5.40258e-05	0.000178247	70	540	848	36	['PABPC1L', 'RBMXL3', 'HTATSF1', 'HNRPF', 'HNRNPL', 'RBMS3', 'SNRNP35', 'PABPC3', 'UHMK1', 'ELAVL2', 'DAZL', 'CELF3', 'SRSF9', 'DND1', 'RNPC3', 'A1CF', 'PTBP2', 'RBM15', 'G3BP2', 'RAVER2', 'TRA2A', 'ELAVL1', 'RBM19', 'U2AF2', 'SF3B4', 'TIAL1', 'CELF1', 'HNRNPM', 'ALKBH8', 'RBM17', 'RBM42', 'SREK1', 'CELF6', 'SYNCRIP', 'PTBP1', 'NOL8']
fn3:2:a	106	78	80	73	4.32165	19456	5.42049e-05	0.000178711	85	419	3017	28	['TTN', 'ROBO2', 'PTPRF', 'MYBPC1', 'CNTN4', 'COL14A1', 'COL12A1', 'TNR', 'FN1', 'MYBPC2', 'CNTN6', 'IGFN1', 'MYBPH', 'NRCAM', 'TIE1', 'NFASC', 'TNC', 'IL7R', 'PTPRD', 'PTPRJ', 'SDK1', 'LRFN2', 'DCC', 'PRTG', 'MYOM1', 'TNN', 'CHL1', 'DSCAM']
V-set:36:q	67	44	52	44	6.08429	19456	5.76127e-05	0.00018941	109	958	562	23	['PDCD1', 'CD2', 'HAVCR1', 'CD8B', 'PSG3', 'IGSF3', 'Q5JXA8', 'SCN1B', 'CEACAM4', 'SIGLEC12', 'HAVCR2', 'CEACAM7', 'IGSF8', 'CLMP', 'SIRPD', 'NCAN', 'MPZL3', 'VPREB1', 'CD7', 'HHLA2', 'TIMD4', 'CXADR', 'MPZL2']
PRY:22:r	23	10	19	10	7.37241	19456	6.05968e-05	0.000198239	49	82	79	8	['TRIM60', 'BTN1A1', 'ENSG00000188683', 'TRIM26', 'LOC493829', 'RFPL3', 'RFPL4A', 'TRIM16']
Myosin_head:151:R	23	10	21	10	6.86884	19456	6.05968e-05	0.000198239	677	99	112	14	['MYO5C', 'MYH1', 'MYO1H', 'MYH13', 'MYH15', 'MYO9A', 'MYH9', 'MYH7', 'MYH6', 'MYO5B', 'MYO7A', 'MYO1G', 'MYH4', 'MYH2']
Filament:217:e	23	10	19	10	7.00377	19456	6.05968e-05	0.000198239	312	104	102	15	['KRT15', 'KRT72', 'KRT33A', 'KRT82', 'KRT23', 'KRT6C', 'KRT36', 'KRT83', 'GFAP', 'KRT31', 'KRT79', 'DES', 'KRT26', 'KRT73', 'KRT5']
TPR_8:14:l	23	10	23	10	4.75435	19456	6.05968e-05	0.000198239	34	198	485	15	['TMTC1', 'SPAG1', 'IFT88', 'TOMM70A', 'TTC7B', 'TTC6', 'PEX5L', 'ZC3H7B', 'BBS4', 'IFIT1', 'PRPF6', 'TMTC3', 'CDC23', 'GPSM2', 'TTC21B']
Cadherin_3:52:e	23	10	19	10	7.06148	19456	6.05968e-05	0.000198239	111	130	98	5	['FREM1', 'FRAS1', 'FREM3', 'FREM2', 'CSPG4']
Mito_carr:71:n	57	36	49	35	6.95761	19456	6.35934e-05	0.000207605	97	100	261	19	['SLC25A5', 'SLC25A48', 'UCP3', 'SLC25A19', 'SLC25A27', 'MTCH2', 'SLC25A35', 'SLC25A13', 'SLC25A39', 'SLC25A34', 'SLC25A44', 'SLC25A33', 'SLC25A2', 'UCP2', 'SLC25A29', 'MCART2', 'SLC25A30', 'SLC25A38', 'SLC25A10']
PDZ:71:k	78	54	50	53	5.98682	19456	6.89831e-05	0.000224099	82	388	700	25	['USH1C', 'INADL', 'TJP1', 'SHANK1', 'DVL3', 'DVL1', 'MPDZ', 'SNX27', 'PDZRN4', 'MAGI3', 'DLG2', 'IL16', 'PTPN13', 'GRIP1', 'PDZK1', 'RGS3', 'SNTG1', 'PDZD3', 'MAST2', 'LIN7A', 'MYO18A', 'LNX1', 'PCLO', 'SYNJ2BP', 'RGS12']
Mito_carr:62:r	37	20	33	20	6.33418	19456	6.94277e-05	0.000225386	97	100	261	18	['MCART2', 'SLC25A23', 'SLC25A24', 'SLC25A36', 'SLC25A14', 'SLC25A11', 'SLC25A32', 'SLC25A44', 'SLC25A21', 'SLC25A13', 'SLC25A47', 'SLC25A31', 'SLC25A48', 'UCP2', 'SLC25A5', 'SLC25A28', 'SLC25A45', 'SLC25A6']
KRAB:33:E	56	35	49	35	5.79257	19456	6.99943e-05	0.000226593	42	570	575	39	['ZNF780A', 'ZNF404', 'ZNF85', 'ZNF470', 'ZNF675', 'ZNF643', 'ZNF347', 'ZNF441', 'ZNF561', 'ZNF560', 'ZNF709', 'ZNF732', 'ZNF764', 'ZNF442', 'ZNF177', 'ZNF445', 'ZNF540', 'ZNF682', 'ZNF12', 'ZNF562', 'ZNF333', 'ZNF655', 'ENSG00000221895', 'ZNF597', 'ZFP82', 'ZNF716', 'ZNF689', 'ZFP30', 'ZNF780B', 'ZNF626', 'ZNF354B', 'ZNF98', 'ZNF471', 'ZNF19', 'ZIM3', 'ZNF670', 'ZNF684', 'ZNF154', 'ZNF586']
P53:62:i	56	35	15	35	9.91559	19456	6.99943e-05	0.000226593	196	33	33	1	['TP53']
EF-hand_7:25:l	38	21	26	21	6.6192	19456	7.19316e-05	0.000232541	71	289	220	12	['KCNIP4', 'CALML4', 'CABP2', 'CALML3', 'RHBDL3', 'CAPS', 'SLC25A25', 'PPP2R3A', 'CABP4', 'CALM3', 'CETN3', 'CAPSL']
Ras:113:K	52	32	34	32	6.71352	19456	7.25401e-05	0.000234345	162	274	282	16	['HRAS', 'KRAS', 'RALB', 'RASD2', 'RHOA', 'RAB33B', 'RAP1B', 'RND1', 'RAB21', 'RAB18', 'RAB34', 'RAB3D', 'RHOB', 'RAB40C', 'RHOT1', 'RAB1B']
WW:31:P	26	12	14	12	6.12515	19456	7.70297e-05	0.000248332	31	129	212	10	['PLEKHA5', 'WWC1', 'MAGI1', 'NEDD4', 'STXBP4', 'MAGI2', 'WWP2', 'WWOX', 'HECW1', 'YAP1']
p450:239:r	26	12	22	12	7.04571	19456	7.70297e-05	0.000248332	463	102	112	9	['CYP2A13', 'CYP2C18', 'CYP2S1', 'CYP1A1', 'CYP7A1', 'CYP2D6', 'CYP3A43', 'CYP2C9', 'CYP2C8']
fn3:29:p	185	153	138	141	5.12511	19456	7.72219e-05	0.000248779	85	419	3017	43	['LRFN2', 'TNC', 'FN1', 'MYOM2', 'TTN', 'CNTN2', 'NPHS1', 'PTPRB', 'COL12A1', 'COL20A1', 'PTPRF', 'TNXB', 'CDON', 'PTPRD', 'PTPRH', 'L1CAM', 'CNTN4', 'USH2A', 'MERTK', 'IL27RA', 'COL14A1', 'EPHB2', 'TNN', 'CNTN6', 'TRIM9', 'PHYHIPL', 'TNR', 'SDK1', 'DCC', 'SDK2', 'OBSCN', 'CNTN1', 'PTPRJ', 'SNED1', 'TEK', 'IL6ST', 'ROS1', 'KAL1', 'GHR', 'IL7R', 'EPHA2', 'TIE1', 'FNDC3A']
TPR_8:9:s	42	24	24	24	5.62311	19456	7.91717e-05	0.000254355	34	198	485	11	['PEX5L', 'TMTC2', 'TMTC3', 'TTC6', 'XAB2', 'TANC2', 'BBS4', 'DNAJC7', 'CDC27', 'TTC39B', 'CTR9']
Filament:21:r	33	17	31	17	7.5246	19456	8.39266e-05	0.000268519	312	104	102	15	['KRT37', 'KRT17', 'KRT23', 'KRT35', 'KRT10', 'KRT72', 'KRT84', 'KRT79', 'KRT80', 'KRT6B', 'KRT39', 'KRT14', 'GFAP', 'KRT76', 'KRT13']
Cadherin_tail:38:q	33	17	2	17	8.80471	19456	8.39266e-05	0.000268519	133	42	42	15	['PCDHA5', 'PCDHA11', 'PCDHA8', 'PCDHA1', 'PCDHA6', 'PCDHA12', 'PCDHA3', 'PCDHA10', 'PCDHAC1', 'PCDHA7', 'PCDHAC2', 'PCDHA9', 'PCDHA4', 'PCDHA13', 'PCDHA2']
zf-C4:59:R	30	15	27	15	6.81159	19456	8.65726e-05	0.000275658	70	152	152	18	['RARA', 'NR2C2', 'NR4A2', 'ESR1', 'RXRA', 'NR1I2', 'HNF4G', 'NR4A3', 'PGR', 'ESRRB', 'NR2F6', 'RXRG', 'NR1D2', 'NR1D1', 'PPARD', 'NR2F2', 'RARB', 'NR6A1']
TIG:2:v	30	15	19	13	6.90977	19456	8.65726e-05	0.000275658	85	80	142	10	['CAMTA2', 'EXOC2', 'PLXNB1', 'PKHD1L1', 'PLXNA2', 'PLXNA1', 'MET', 'PKHD1', 'PLXNA4', 'PLXNA3']
Kringle:52:R	30	15	30	14	7.35908	19456	8.65726e-05	0.000275658	79	39	104	6	['HGF', 'LPA', 'PLG', 'F2', 'PLAT', 'ROR1']
Helicase_C:74:d	30	15	26	15	6.43016	19456	8.65726e-05	0.000275658	111	196	198	14	['CHD4', 'SMARCA5', 'DHX29', 'DDX55', 'DDX5', 'SMARCA4', 'DDX31', 'CHD5', 'EIF4A1', 'HELLS', 'ERCC6', 'SKIV2L2', 'DDX42', 'DDX28']
Pkinase_Tyr:120:L	30	15	21	15	3.75574	19456	8.65726e-05	0.000275658	260	1213	1264	16	['ROS1', 'NTRK1', 'EPHB3', 'RIPK1', 'TGFBR2', 'BMX', 'FLT4', 'FGFR3', 'FGFR2', 'ITK', 'TEK', 'EPHB4', 'ACVR1C', 'NRBP1', 'BMPR1B', 'ALK']
RhoGEF:26:p	27	13	21	13	6.22804	19456	8.90804e-05	0.000282868	181	200	205	12	['PLEKHG4B', 'SOS2', 'NGEF', 'ITSN2', 'ARHGEF26', 'VAV2', 'DNMBP', 'PLEKHG3', 'ARHGEF12', 'PREX2', 'PREX1', 'ARHGEF6']
Helicase_C:67:s	27	13	27	13	6.27816	19456	8.90804e-05	0.000282868	111	196	198	16	['DDX58', 'DDX10', 'DDX39B', 'DDX60L', 'C9orf102', 'ERCC6L', 'SRCAP', 'TDRD9', 'DHX34', 'DHX33', 'SMARCA5', 'SMARCA4', 'CHD7', 'HFM1', 'DDX39A', 'DDX28']
Trypsin:201:g	27	13	26	13	6.10016	19456	8.90804e-05	0.000282868	221	210	224	19	['C1S', 'MASP1', 'CTRC', 'CELA1', 'TMPRSS11D', 'PRSS12', 'KLK6', 'CELA3A', 'KLK3', 'KLK8', 'GZMK', 'CFI', 'KLK10', 'PRSS58', 'C1RL', 'TMPRSS11E', 'GZMB', 'CELA2B', 'TMPRSS11B']
Helicase_C:68:d	27	13	19	13	6.27816	19456	8.90804e-05	0.000282868	111	196	198	14	['TTF2', 'DDX55', 'DDX43', 'DDX59', 'RECQL5', 'HFM1', 'DDX60', 'DDX23', 'DDX4', 'CHD1', 'DDX42', 'DDX60L', 'DDX39B', 'ATRX']
Ion_trans:243:r	73	50	48	46	5.76691	19456	8.99897e-05	0.000285561	245	359	763	20	['TRPC3', 'CACNA1E', 'SCN1A', 'KCNS2', 'CACNA1G', 'SCN5A', 'SCN3A', 'NALCN', 'KCNB1', 'CACNA1A', 'CACNA1B', 'KCNA5', 'SCN8A', 'KCNB2', 'SCN7A', 'KCNS1', 'KCNA2', 'SCN10A', 'KCNH4', 'KCNA3']
Laminin_G_2:125:g	31	16	19	16	6.0734	19456	9.66088e-05	0.000305108	126	111	262	13	['CNTNAP5', 'FAT4', 'NRXN2', 'NRXN1', 'CRB2', 'EGFLAM', 'CNTNAP1', 'PROS1', 'SLIT3', 'CNTNAP4', 'CNTNAP2', 'CNTNAP3', 'NRXN3']
Filamin:95:k	31	16	21	16	5.8589	19456	9.66088e-05	0.000305108	103	28	304	4	['FLNC', 'FLNB', 'FLNA', 'KDELC2']
Trypsin:197:s	31	16	26	16	6.29947	19456	9.66088e-05	0.000305108	221	210	224	13	['PLG', 'GZMK', 'KLK10', 'HPN', 'F2', 'TMPRSS5', 'GZMA', 'PRSS1', 'KLK11', 'KLK5', 'TMPRSS3', 'HGF', 'CFI']
Neur_chan_memb:15:v	31	16	30	16	7.55224	19456	9.66088e-05	0.000305108	238	87	94	9	['GABRD', 'GABRA1', 'CHRNB1', 'GABRE', 'GABRP', 'GABRB1', 'GLRB', 'GLRA3', 'GLRA2']
Nebulin:13:k	59	38	28	35	6.29381	19456	9.67222e-05	0.000305259	29	13	428	3	['NEB', 'NEBL', 'NRAP']
7tm_4:61:e	155	125	142	115	7.60221	19456	9.70331e-05	0.000306033	280	469	454	95	['OR5M3', 'OR5H2', 'OR7A5', 'OR5M11', 'OR5AS1', 'OR1S2', 'OR4X1', 'OR1J2', 'OR8I2', 'OR8K1', 'OR51A7', 'OR7A10', 'OR5AU1', 'OR52E6', 'OR52K2', 'OR52E4', 'OR4S2', 'OR5M9', 'OR4P4', 'OR4A15', 'OR14K1', 'OR7G3', 'OR4D5', 'OR2A25', 'OR2H2', 'OR51A4', 'OR5K3', 'OR9Q1', 'OR9G4', 'OR14A16', 'OR52N2', 'OR1L1', 'OR10G4', 'OR5H6', 'OR13C8', 'OR2T6', 'OR2B6', 'OR51Q1', 'OR52H1', 'OR5L2', 'OR6M1', 'OR6C65', …
Cadherin:25:l	243	210	176	189	6.66487	19456	9.95825e-05	0.00031386	93	227	1363	65	['FAT3', 'PCDHA11', 'PCDHAC1', 'CDH12', 'PCDHGC3', 'PCDHA1', 'FAT', 'PCDH17', 'PCDHGA6', 'DCHS1', 'CDH17', 'CDH8', 'FAT4', 'PCDHA2', 'PCDHGB7', 'PCDHA4', 'CDH2', 'CDH9', 'PCDHA5', 'CDH6', 'CDH11', 'PCDHGA12', 'PCDHB4', 'CELSR3', 'PCDHAC2', 'PCDHB5', 'CLSTN2', 'PCDHA13', 'CDH24', 'PCDHA8', 'CDHR1', 'PCDH11Y', 'PCDHB11', 'CDH1', 'PCDHA9', 'CDH7', 'CDH23', 'PCDHB13', 'PCDHA7', 'PCDH10', 'CDH18', 'PC…
UCH:186:s	21	9	17	9	6.33549	19456	0.000101549	0.000318548	257	148	148	12	['USP51', 'USP2', 'USP6', 'USP36', 'USP29', 'USP21', 'USP53', 'USP24', 'USP44', 'USP40', 'USP16', 'USP7']
MFS_1:253:l	21	9	18	9	5.57916	19456	0.000101549	0.000318548	353	229	250	10	['SLC17A1', 'SLC17A3', 'SLC17A4', 'SLC17A2', 'MFSD4', 'SLC17A5', 'MFSD9', 'SLC18A3', 'SLC17A9', 'SLC17A6']
Sushi:14:a	111	84	73	83	6.28883	19456	0.000101178	0.000318548	56	146	808	22	['CFHR5', 'SEZ6L2', 'CSMD3', 'NCAN', 'C4BPA', 'CSMD2', 'CFH', 'CD46', 'CR1', 'CR2', 'MASP2', 'SEZ6', 'CFHR4', 'C7', 'TPO', 'VCAN', 'SEZ6L', 'CFHR1', 'CFHR3', 'C6', 'CR1L', 'CFHR2']
TB:21:e	21	9	17	9	7.31613	19456	0.000101549	0.000318548	41	16	75	5	['LTBP2', 'FBN1', 'FBN2', 'LTBP3', 'FBN3']
7tm_2:123:G	21	9	14	9	6.44691	19456	0.000101549	0.000318548	245	136	137	10	['EMR2', 'CRHR2', 'LPHN3', 'GPR112', 'EMR3', 'GPR110', 'GPR126', 'VIPR2', 'GHRHR', 'GPR128']
Y_phosphatase:189:a	21	9	13	8	6.00579	19456	0.000101549	0.000318548	235	152	186	6	['PTPRF', 'PTPRU', 'PTPRD', 'PTPN12', 'PTPRM', 'PTPRO']
7tm_1:242:a	44	26	39	25	4.89267	19456	0.000102944	0.000322271	268	839	843	20	['P2RY6', 'NTSR2', 'GPR37L1', 'CCR3', 'GPR32', 'RXFP4', 'BRS3', 'EDNRB', 'NMUR2', 'P2RY13', 'CCR9', 'GPR55', 'CXCR3', 'EDNRA', 'GPR34', 'CXCR2', 'CCKAR', 'P2RY10', 'NMBR', 'CXCR1']
Trypsin:151:t	48	29	48	29	6.93024	19456	0.000105093	0.000328558	221	210	224	13	['CMA1', 'F2', 'KLK6', 'KLK5', 'OVCH1', 'PRSS58', 'HPN', 'PLG', 'TMPRSS4', 'KLK8', 'PLAT', 'PRSS1', 'F9']
Mito_carr:76:a	55	35	50	34	6.90608	19456	0.00010565	0.000329856	97	100	261	16	['SLC25A6', 'SLC25A22', 'UCP3', 'MTCH1', 'MCART2', 'SLC25A21', 'SLC25A28', 'SLC25A2', 'SLC25A40', 'SLC25A3', 'SLC25A34', 'UCP2', 'SLC25A23', 'SLC25A41', 'SLC25A36', 'SLC25A12']
TSP_1:27:p	55	35	43	35	6.17244	19456	0.00010565	0.000329856	49	105	434	21	['THSD7B', 'C6', 'BAI3', 'ADAMTS1', 'CILP2', 'ADAMTSL3', 'ADAMTSL4', 'ADAMTS20', 'HMCN1', 'SEMA5A', 'ADAMTS5', 'C8B', 'ADAMTS12', 'CILP', 'ADAMTS16', 'ADAMTS18', 'ADAMTS6', 'UNC5C', 'UNC5B', 'ADAMTS2', 'BAI2']
Ig_3:31:p	123	95	90	91	4.72828	19456	0.000107286	0.00033429	79	936	2641	53	['CNTN2', 'CDON', 'DSCAML1', 'ROBO3', 'MUSK', 'FGFR3', 'PSG4', 'IGSF9', 'CD22', 'CADM2', 'NFASC', 'AXL', 'IGLON5', 'MDGA1', 'IGDCC4', 'KIRREL3', 'ROBO2', 'GPA33', 'VCAM1', 'NCAM2', 'CNTN1', 'PTPRD', 'MAG', 'CNTN4', 'LRIG1', 'IGSF10', 'PXDNL', 'HMCN1', 'FGFR2', 'HEPACAM2', 'HSPG2', 'KIRREL', 'PSG1', 'KDR', 'CNTN5', 'MALT1', 'PSG2', 'PVRL4', 'FLT1', 'PVRL1', 'CNTN6', 'IGDCC3', 'NEO1', 'NPHS1', 'LRI…
7tm_4:27:q	147	118	142	116	7.52575	19456	0.000112523	0.000350138	280	469	454	86	['OR4F6', 'OR10A3', 'OR4P4', 'OR1E1', 'OR4D11', 'OR4C13', 'OR52N5', 'OR4X1', 'OR2B11', 'OR4A15', 'OR10G2', 'OR6N1', 'OR6C4', 'OR5B12', 'OR11H4', 'OR52N2', 'OR6P1', 'OR2A12', 'OR6C6', 'OR2M4', 'OR10G7', 'OR4S2', 'OR9Q1', 'OR2Z1', 'OR4Q3', 'OR2T8', 'OR51E2', 'OR56A3', 'OR4K15', 'OR2AG2', 'OR4K13', 'OR13J1', 'OR4L1', 'OR5L2', 'OR51A7', 'OR51D1', 'OR51S1', 'OR5H2', 'OR2AT4', 'OR1L3', 'OR4C3', 'OR10V1…
zf-C2H2:13:k	303	270	252	253	5.70101	19456	0.000114986	0.000357087	23	1207	3315	149	['ZNF347', 'ZNF433', 'ZNF133', 'ZNF331', 'REPIN1', 'ZNF501', 'ZNF879', 'ZIC5', 'ZNF90', 'ZNF182', 'HKR1', 'ZNF567', 'ZBTB20', 'ZNF569', 'PRDM14', 'ZNF764', 'ZBTB6', 'ZNF480', 'ZNF543', 'ZNF878', 'ZNF615', 'ZNF45', 'ZNF708', 'ZNF675', 'ZSCAN10', 'ZNF184', 'ZNF33B', 'ZNF100', 'ZNF71', 'ZSCAN23', 'ZNF772', 'ZNF677', 'ZBTB45', 'ZNF691', 'ZNF782', 'ZNF664', 'ZNF268', 'ZNF584', 'ZNF304', 'ZNF568', 'ZNF…
Collagen:9:p	86	62	72	60	5.81568	19456	0.0001194	0.000369807	60	175	869	30	['COL1A1', 'COL11A1', 'COL4A1', 'COL27A1', 'COL6A2', 'COL7A1', 'COL6A1', 'COL4A5', 'COL25A1', 'COL4A3', 'COL22A1', 'COLEC11', 'COL23A1', 'COL28A1', 'COL4A2', 'COL18A1', 'CCBE1', 'COL4A4', 'SCARA3', 'MSR1', 'COL14A1', 'COL2A1', 'COL8A2', 'COL9A3', 'COL4A6', 'COL13A1', 'COL1A2', 'COL21A1', 'COL5A3', 'C1QTNF3']
LRR_8:60:r	118	91	93	91	6.0129	19456	0.000121232	0.000374483	61	364	1040	62	['LRCH1', 'LRRC8A', 'PIDD', 'AMIGO2', 'LRRTM4', 'LRRC27', 'LRRC4B', 'PODN', 'LRRC4C', 'LRRN1', 'OMD', 'SLITRK5', 'ECM2', 'LRRN2', 'PXDN', 'SCRIB', 'LRFN2', 'RSU1', 'LRRC15', 'LRFN3', 'LINGO1', 'SLITRK6', 'SLIT2', 'LRRTM3', 'TLR4', 'LRTM1', 'LGR4', 'TLR9', 'NYX', 'LRRTM2', 'LRRC2', 'LRRIQ4', 'Q7Z2Q7', 'FLRT3', 'NTRK2', 'GPR125', 'LINGO4', 'ERBB2IP', 'LRG1', 'SLITRK3', 'LRRC40', 'IGFALS', 'RXFP1', …
Pkinase:249:p	77	54	55	54	5.08291	19456	0.000123439	0.000381048	264	1221	1293	51	['AMHR2', 'SBK2', 'CDK7', 'CAMK2D', 'RIPK4', 'CDK13', 'OXSR1', 'MAP4K1', 'MAPKAPK2', 'ULK3', 'MAST4', 'MAP2K4', 'LATS2', 'TAOK1', 'RPS6KA2', 'MAPKAPK5', 'NUAK1', 'SIK1', 'SGK2', 'PIM2', 'STK39', 'NEK1', 'MOS', 'CDC42BPG', 'PAK7', 'CHUK', 'ICK', 'MAPK1', 'MAPK12', 'ADRBK2', 'ACVR2A', 'TSSK1B', 'ERN2', 'TAOK2', 'PDIK1L', 'RPS6KC1', 'MAPK11', 'PRKG1', 'CAMK2B', 'STRADB', 'MKNK2', 'DYRK3', 'STK11', '…
Nebulin:28:K	36	20	14	20	5.58109	19456	0.000125497	0.000387144	29	13	428	2	['NRAP', 'NEB']
Ion_trans:67:r	97	72	76	70	6.177	19456	0.000132603	0.000407982	245	359	763	33	['ITPR2', 'KCND2', 'CACNA1C', 'KCNG1', 'KCNA3', 'TPCN1', 'KCNV1', 'TRPV3', 'CACNA1D', 'CACNA1H', 'SCN10A', 'CNGA3', 'CACNA1B', 'KCNV2', 'SCN1A', 'HCN2', 'SCN2A', 'CACNA1A', 'CACNA1F', 'KCND1', 'CACNA1S', 'TRPC5', 'CACNA1E', 'CACNA1I', 'SCN11A', 'SCN8A', 'SCN9A', 'SLC9A10', 'KCNH3', 'TRPM8', 'TRPM4', 'SCN5A', 'KCNA5']
Pkinase_Tyr:220:k	41	24	31	22	4.2064	19456	0.000135369	0.000415394	260	1213	1264	20	['INSRR', 'MUSK', 'DDR2', 'EPHB2', 'MST1R', 'ROR2', 'AXL', 'ERBB3', 'EPHA1', 'TXK', 'ZAP70', 'DSTYK', 'EPHA7', 'PTK2B', 'ABL1', 'GUCY2D', 'TEX14', 'BMPR1B', 'ERBB4', 'DDR1']
Lectin_C:14:k	41	24	34	23	6.73539	19456	0.000135369	0.000415394	108	165	219	21	['CLEC2D', 'CLEC4F', 'COLEC12', 'CLEC2A', 'SELE', 'CD72', 'LY75', 'CLEC4D', 'CLEC3A', 'SFTPD', 'CD209', 'PLA2R1', 'DGCR2', 'NCAN', 'CLEC1A', 'REG3G', 'CLEC4M', 'MRC2', 'CLEC3B', 'CLEC5A', 'CHODL']
Mito_carr:74:r	41	24	38	24	6.48228	19456	0.000135369	0.000415394	97	100	261	23	['SLC25A32', 'SLC25A45', 'SLC25A3', 'SLC25A21', 'SLC25A20', 'SLC25A23', 'SLC25A30', 'SLC25A6', 'MCART2', 'SLC25A35', 'SLC25A47', 'SLC25A2', 'SLC25A13', 'SLC25A38', 'SLC25A11', 'SLC25A19', 'UCP3', 'SLC25A4', 'UCP2', 'SLC25A12', 'SLC25A42', 'MCART1', 'SLC25A29']
Ank_2:57:a	122	95	96	89	5.46682	19456	0.00013595	0.000416902	84	529	1570	48	['ANKRD50', 'ANKRD52', 'ANK1', 'INVS', 'RIPK4', 'ABTB1', 'ANKFY1', 'SNCAIP', 'BCL3', 'NFKBIE', 'CDKN2D', 'ANKRD46', 'TNKS', 'PSMD10', 'TRPA1', 'ESPN', 'RNASEL', 'ILK', 'ASB7', 'ANK2', 'ASB2', 'ZDHHC13', 'TANC1', 'ASB13', 'GABPB1', 'NOTCH1', 'ASB10', 'ANKS1A', 'ASB5', 'ANKRD16', 'TNKS2', 'ANKHD1', 'RFXANK', 'ANKRD5', 'ANKRD42', 'ASB15', 'TRPV3', 'ZDHHC17', 'DAPK1', 'GABPB2', 'BARD1', 'AGAP3', 'ANK…
Spectrin:44:k	40	23	29	23	5.0546	19456	0.000140111	0.000429379	105	94	685	12	['ACTN2', 'SPTBN4', 'SPTAN1', 'ACTN1', 'SPTBN1', 'SPTBN2', 'SPTBN5', 'TRIO', 'DST', 'ACTN4', 'KALRN', 'MACF1']
Ion_trans:204:d	78	55	57	55	5.86249	19456	0.000141386	0.000433002	245	359	763	29	['CACNA1E', 'TRPM6', 'SCN11A', 'CACNA1D', 'SCN7A', 'SCN2A', 'KCNA5', 'KCNG1', 'TRPA1', 'SCN1A', 'CACNA1B', 'SCN8A', 'KCNH7', 'CACNA1S', 'KCNA6', 'CACNA1C', 'NALCN', 'TRPC6', 'HCN3', 'CNGA1', 'KCNA4', 'KCNG2', 'CACNA1A', 'CNGA4', 'KCNS3', 'CNGA2', 'TRPV1', 'SCN5A', 'KCNA10']
7tm_4:276:l	120	93	102	92	7.23297	19456	0.000142184	0.000435157	280	469	454	54	['OR13C5', 'OR5H6', 'OR7A10', 'OR1A1', 'OR2T1', 'OR8B12', 'OR5K4', 'OR2AE1', 'OR2T10', 'OR5K3', 'OR52A5', 'OR5H1', 'OR51E1', 'OR9Q2', 'OR5AN1', 'OR51L1', 'OR13F1', 'OR6C70', 'OR5B12', 'OR4N5', 'OR2K2', 'OR13A1', 'OR6K2', 'OR5M10', 'OR52E2', 'OR2M2', 'OR4B1', 'OR51V1', 'OR5A1', 'OR2AP1', 'OR5H2', 'OR9K2', 'OR8K1', 'OR1L1', 'OR5T2', 'OR11L1', 'OR2A42', 'OR6B3', 'OR2AG1', 'OR5J2', 'OR2C3', 'OR4K13',…
Ion_trans:182:a	58	38	37	38	5.43507	19456	0.000144309	0.000440792	245	359	763	25	['CACNA1D', 'KCNB1', 'SCN9A', 'SCN2A', 'CACNA1S', 'SCN1A', 'CACNA1H', 'CACNA1G', 'KCNC4', 'CATSPER2', 'CACNA1C', 'SCN5A', 'KCNB2', 'SCN4A', 'CATSPER4', 'KCNC2', 'KCND3', 'TRPM1', 'SCN11A', 'HCN1', 'KCNH7', 'SCN3A', 'NALCN', 'SCN8A', 'TRPV2']
KRAB:14:e	58	38	47	36	5.84319	19456	0.000144309	0.000440792	42	570	575	44	['ZNF177', 'ZNF582', 'ZNF528', 'ZNF701', 'ZFP112', 'ZNF441', 'ZNF716', 'ZNF556', 'ZNF135', 'ZNF264', 'ZNF398', 'ZNF611', 'ZNF709', 'ZNF613', 'ZNF331', 'ZNF510', 'ZNF480', 'PRDM9', 'ZFP57', 'ZNF132', 'ZNF233', 'ZNF430', 'ZNF589', 'ZNF813', 'ZNF274', 'ZNF256', 'ZNF862', 'ZNF479', 'ZNF783', 'ZNF776', 'ZNF429', 'ZNF434', 'ZNF565', 'POGK', 'ZNF347', 'ZNF208', 'ZNF699', 'ZNF454', 'ZNF673', 'ZNF215', 'Z…
Cadherin_C_2:26:a	32	17	30	17	7.94318	19456	0.000146457	0.00044706	85	86	74	15	['PCDHGA3', 'PCDHGA6', 'PCDHB13', 'PCDHGA7', 'PCDHGA5', 'PCDHG', 'PCDHB7', 'PCDHA5', 'PCDHB4', 'PCDHGA12', 'PCDHB14', 'PCDHB2', 'PCDHGB6', 'PCDHB3', 'PCDHB11']
Reprolysin:106:a	24	11	12	11	7.19843	19456	0.000147195	0.000448722	199	93	93	8	['ADAM12', 'ADAMTS20', 'ADAM2', 'ADAM29', 'ADAMTS18', 'ADAM18', 'ADAMTS16', 'ADAMTS4']
Cadherin_C_2:1:k	24	11	17	11	7.52814	19456	0.000147195	0.000448722	85	86	74	7	['PCDHG', 'PCDHB6', 'PCDHGC3', 'PCDHB12', 'PCDHB5', 'PCDHGB3', 'PCDHB14']
Bromodomain:66:s	25	12	15	12	6.0217	19456	0.000158909	0.000481278	84	143	219	11	['KAT2A', 'PBRM1', 'TAF1', 'BRD3', 'ZMYND8', 'BAZ1A', 'EP300', 'BRD4', 'TRIM33', 'PHIP', 'BRDT']
MFS_1:142:g	25	12	20	12	5.8307	19456	0.000158909	0.000481278	353	229	250	12	['SLC37A2', 'SLC43A3', 'FLVCR2', 'SLC16A13', 'MFSD1', 'SLC17A2', 'HIATL1', 'SV2C', 'SLC17A9', 'SLC18A3', 'SLC17A5', 'SLC16A14']
Hormone_recep:35:p	25	12	18	12	6.59681	19456	0.000158909	0.000481278	208	153	147	12	['RXRG', 'ESR2', 'NR2E1', 'HNF4G', 'NR1H4', 'NR2F2', 'NR4A3', 'NR2C1', 'RARA', 'RARG', 'THRA', 'NR1H2']
ANF_receptor:102:s	25	12	19	12	7.28869	19456	0.000158909	0.000481278	352	92	91	14	['GRIA4', 'GRIK3', 'GRID2', 'GRID1', 'GRIA2', 'GRM3', 'NPR3', 'TAS1R3', 'GRIN2A', 'GRIK1', 'GRIA3', 'GRM4', 'GABBR1', 'NPR2']
TIG:14:s	25	12	17	12	6.64674	19456	0.000158909	0.000481278	85	80	142	7	['PLXNA3', 'EBF3', 'PKHD1L1', 'PKHD1', 'PLXNA4', 'PLXND1', 'PLXNA2']
Y_phosphatase:33:n	22	10	12	10	6.0729	19456	0.000159725	0.000482807	235	152	186	6	['PTPRZ1', 'PTPN11', 'PTPRA', 'PTPRD', 'PTPRJ', 'PTPRE']
FAM47:199:a	22	10	13	10	8.9682	19456	0.000159725	0.000482807	257	7	25	3	['FAM47B', 'FAM47C', 'FAM47A']
Cadherin_3:102:d	22	10	20	10	6.99735	19456	0.000159725	0.000482807	111	130	98	5	['FREM2', 'FREM1', 'CSPG4', 'FRAS1', 'FREM3']
P53:183:a	57	37	16	37	9.94113	19456	0.000160253	0.00048409	196	33	33	2	['TP53', 'TP73']
SPRY:8:i	28	14	24	14	6.58494	19456	0.000160606	0.000484527	120	148	166	13	['RFPL2', 'RYR2', 'SPSB4', 'RFPL3', 'TRIM11', 'TRIM34', 'ERMAP', 'SPRYD3', 'RYR1', 'TRIM5', 'TRIM65', 'TRIM60', 'TRIM10']
7tm_2:222:p	28	14	20	14	6.86195	19456	0.000160606	0.000484527	245	136	137	13	['GLP2R', 'CELSR1', 'CRHR2', 'GPR115', 'GLP1R', 'EMR2', 'GPR128', 'GPR97', 'GPR126', 'ADCYAP1R1', 'GPR111', 'PTH2R', 'BAI3']
Pkinase:211:d	79	56	50	55	5.1199	19456	0.000162382	0.000488616	264	1221	1293	42	['MGC42105', 'PRKACB', 'CAMK2D', 'MARK1', 'WNK3', 'PRKCE', 'TAOK2', 'RPS6KA2', 'MARK2', 'ADRBK2', 'PRKCB', 'PRKD1', 'AKT3', 'GRK4', 'TRAD', 'CDK14', 'STK40', 'MARK4', 'BRSK2', 'STK32B', 'PRKCG', 'WNK4', 'CDKL2', 'CAMKV', 'MYO3A', 'STK17B', 'CDK7', 'YSK4', 'PRKCI', 'C9orf96', 'CDK1', 'RAGE', 'NEK5', 'STK16', 'PAK2', 'PRKACG', 'CLK4', 'HIPK3', 'NUAK1', 'SgK495', 'ENSG00000168038', 'CDK13']
Ig_2:35:k	89	65	62	61	4.94186	19456	0.000168311	0.000504825	79	811	1648	20	['FCRL3', 'FCRL5', 'FCRLA', 'SIGLEC10', 'A1BG', 'IGSF1', 'SIGLEC1', 'FCRLB', 'FCRL1', 'CNTN5', 'IL1RAPL2', 'FCRL4', 'FCER1A', 'LILRA1', 'SIGLEC12', 'FCRL2', 'FCGR1A', 'LAIR1', 'SIGLEC14', 'HSPG2']
SRCR:5:s	29	15	19	15	5.93379	19456	0.000170664	0.000511223	100	56	270	7	['DMBT1', 'CD163L1', 'PRSS12', 'LOXL3', 'CFI', 'CD6', 'CD163']
Plectin:5:A	29	15	5	15	6.03333	19456	0.000170664	0.000511223	41	20	252	1	['PLEC']
7tm_1:265:P	102	77	79	77	6.10567	19456	0.0001721	0.000515191	268	839	843	68	['DRD3', 'MC5R', 'S1PR3', 'CYSLTR1', 'NPSR1', 'C3AR1', 'GPR50', 'OXER1', 'EDNRB', 'CCKAR', 'NPY2R', 'LGR4', 'PROKR1', 'HTR5A', 'GPR3', 'MCHR2', 'HRH2', 'MTNR1A', 'CHRM3', 'P2RY8', 'LPAR3', 'GPR75', 'ADORA3', 'TRHR', 'CXCR2', 'CX3CR1', 'OPRK1', 'HTR2A', 'OPN5', 'GPR171', 'LPAR4', 'P2RY1', 'RXFP1', 'NMUR1', 'RXFP2', 'P2RY10', 'GPR85', 'GPR37', 'LHCGR', 'ADORA1', 'CXCR3', 'HCRTR2', 'CHRM2', 'CNR1', …
Plectin:7:a	37	21	8	21	6.3848	19456	0.000175313	0.000523176	41	20	252	2	['DST', 'PLEC']
PDZ:52:s	53	34	34	34	5.42934	19456	0.000175329	0.000523176	82	388	700	19	['DLG2', 'PDZD4', 'USH1C', 'PARD3', 'PARD3B', 'MAST3', 'MPDZ', 'PDZD3', 'GRIP1', 'APBA2', 'SYNJ2BP', 'MAGI1', 'SHROOM2', 'MPP5', 'FRMPD1', 'SDCBP', 'SHROOM3', 'SNTG1', 'GOPC']
EF-hand_7:17:g	37	21	33	21	6.58072	19456	0.000175313	0.000523176	71	289	220	19	['MYL7', 'PPP3R2', 'GUCA1A', 'TNNC1', 'CALML5', 'CIB4', 'VSNL1', 'CHP', 'OCM', 'MACF1', 'OCM2', 'CABP4', 'CALML3', 'CETN1', 'PVALB', 'SLC25A24', 'EFHD2', 'CAPSL', 'GPD2']
7tm_4:190:l	148	120	137	114	7.53553	19456	0.000186721	0.000556455	280	469	454	71	['OR2T12', 'OR52N2', 'OR51D1', 'OR1N2', 'OR5T2', 'OR4K17', 'OR5K4', 'OR1L6', 'OR4D6', 'OR5M9', 'OR52A1', 'OR6K6', 'OR8H3', 'OR13H1', 'OR2A5', 'OR8H1', 'OR2T1', 'OR1M1', 'OR8H2', 'OR8S1', 'OR5B21', 'OR52K2', 'OR2L3', 'OR7G3', 'OR2T6', 'OR5AC2', 'OR2M3', 'OR52J3', 'OR1I1', 'OR8B8', 'OR2L2', 'OR52D1', 'OR6C74', 'OR1L1', 'OR10R2', 'OR10S1', 'OR10A3', 'OR1E1', 'OR8K5', 'OR52A5', 'OR3A3', 'OR2M4', 'OR6…
7tm_1:98:r	95	71	82	69	6.0031	19456	0.000197608	0.000587021	268	839	843	49	['ADRA2A', 'MTNR1B', 'GPR139', 'ADRA1A', 'NTSR2', 'ADRA2C', 'MC4R', 'GPR132', 'GPR85', 'GPR101', 'LPAR1', 'MC5R', 'OXGR1', 'CCR1', 'HTR5A', 'GPR26', 'CXCR2', 'FFAR1', 'FPR1', 'CCKBR', 'F2RL1', 'HTR2C', 'HRH2', 'HCAR2', 'CHRM4', 'F2RL3', 'SSTR1', 'OPRK1', 'NPY5R', 'HTR2B', 'GPR82', 'GALR1', 'HCRTR2', 'PROKR2', 'HTR4', 'CXCR3', 'GPR32', 'NPY1R', 'PTAFR', 'NMBR', 'OPN1LW', 'GPR171', 'SSTR2', 'ADORA2…
Mito_carr:61:l	48	30	48	30	6.70969	19456	0.000207557	0.000615394	97	100	261	9	['SLC25A19', 'UCP1', 'SLC25A17', 'UCP3', 'SLC25A21', 'SLC25A34', 'SLC25A4', 'SLC25A2', 'SLC25A5']
VWA:124:a	34	19	28	19	6.2859	19456	0.000220338	0.00065163	175	144	248	17	['MATN4', 'ANTXR2', 'COL6A6', 'COL6A1', 'COL22A1', 'VWF', 'COL14A1', 'VWA1', 'COL20A1', 'ITIH2', 'COL6A3', 'COL12A1', 'MATN2', 'COL21A1', 'VWA2', 'COL6A2', 'ITIH4']
C1-set:20:t	33	18	33	18	6.28413	19456	0.000230037	0.000678156	89	334	241	5	['NCR3LG1', 'HLA-DRB1', 'CD1C', 'SIRPB1', 'HLA-DRB5']
SH2:39:s	43	26	29	26	6.672	19456	0.000235611	0.000694149	77	215	240	14	['FES', 'SHC4', 'ABL2', 'DAPP1', 'PTPN6', 'SOCS2', 'SOCS1', 'SHE', 'SHC3', 'TXK', 'NCK1', 'SH2D7', 'STAT5A', 'NCK2']
Sushi:31:p	111	86	74	84	6.28883	19456	0.000243676	0.000717003	56	146	808	24	['CSMD2', 'CR2', 'CFHR3', 'CFHR4', 'F13B', 'APOH', 'CSMD3', 'SRPX', 'CFH', 'CR1', 'SEZ6L', 'SEZ6', 'CFHR1', 'SEZ6L2', 'CFB', 'C4BPA', 'C2', 'CD46', 'PAPPA2', 'PAPPA', 'SUSD4', 'SRPX2', 'CFHR5', 'SELE']
Pkinase:224:k	61	41	35	41	4.74686	19456	0.000247862	0.000728857	264	1221	1293	27	['TSSK1B', 'MST4', 'TLK1', 'TLK2', 'MAP2K4', 'ICK', 'CAMKK2', 'MAPK4', 'TSSK4', 'CAMKV', 'DCLK1', 'IRAK1', 'CAMKK1', 'EIF2AK4', 'MAP2K2', 'ERN1', 'DMPK', 'PRKD2', 'CDK8', 'DAPK1', 'TGFBR1', 'C14orf20', 'STK10', 'RIPK4', 'CAMK1D', 'MAP3K4', 'TRIB3']
7tm_4:200:s	114	89	109	87	7.15897	19456	0.000251553	0.000739246	280	469	454	82	['OR2A14', 'OR10G9', 'OR8I2', 'OR52E4', 'OR14J1', 'OR4C5', 'OR2T6', 'OR6C1', 'OR5C1', 'OR2T4', 'OR52D1', 'OR6X1', 'OR4D1', 'OR1L3', 'OR10W1', 'OR51A2', 'OR51S1', 'OR13C4', 'OR2M7', 'OR8D4', 'OR2T12', 'OR5H15', 'OR10A2', 'OR5L2', 'OR5H14', 'OR5M9', 'OR4C13', 'OR2T10', 'OR1N2', 'OR51A7', 'OR10J5', 'OR4L1', 'OR13D1', 'OR5AU1', 'OR52K2', 'OR2G3', 'OR9Q1', 'OR52L1', 'OR51I2', 'OR4K2', 'OR51B5', 'OR6K3…
cEGF:14:p	30	16	23	16	6.0206	19456	0.000265467	0.00077866	24	136	263	13	['CD93', 'LRP2', 'SCUBE3', 'FBN2', 'FBLN5', 'FBLN1', 'GAS6', 'EFEMP2', 'EMR1', 'FBLN2', 'HMCN1', 'LTBP1', 'LRP1B']
MFS_1:158:a	30	16	23	16	6.09374	19456	0.000265467	0.00077866	353	229	250	15	['SLC18A2', 'SLC16A4', 'SLC17A2', 'SLC16A9', 'SLC17A7', 'SLC22A18', 'SLC37A3', 'SLC17A1', 'SLC17A9', 'SLC16A5', 'SV2C', 'SPNS1', 'SLC37A1', 'SPNS2', 'SLC16A10']
VWA:98:g	30	16	21	16	6.10532	19456	0.000265467	0.00077866	175	144	248	9	['FLJ35880', 'COL6A3', 'VWF', 'COL21A1', 'COL6A6', 'MATN4', 'VIT', 'COL12A1', 'ITIH4']
Cadherin_2:50:l	45	28	38	27	7.6558	19456	0.00027772	0.000813571	83	178	127	16	['PCDHGC3', 'PCDH18', 'PCDHGA8', 'PCDH11X', 'PCDHB7', 'PCDHGB3', 'PCDHB5', 'PCDHGB6', 'PCDHGA5', 'PCDH17', 'PCDHB4', 'PCDHGA12', 'PCDHGA6', 'PCDH9', 'PCDHGA11', 'PCDHB1']
VWA:39:r	45	28	35	27	6.69029	19456	0.00027772	0.000813571	175	144	248	12	['MATN4', 'COL6A2', 'COL6A3', 'VIT', 'MATN2', 'COL6A6', 'COL12A1', 'COL6A1', 'COL14A1', 'VWF', 'COL22A1', 'COL7A1']
zf-C2H2_6:9:k	172	144	131	136	5.27911	19456	0.000280561	0.000821379	27	782	2521	77	['ZNF526', 'ZNF678', 'ZNF782', 'ZFP37', 'ZNF814', 'ZNF493', 'PRDM16', 'ZNF135', 'ZBTB16', 'ZNF530', 'GFI1', 'ZNF672', 'ZNF573', 'ZNF791', 'ZNF808', 'ZNF12', 'ZNF770', 'ZNF605', 'ZNF667', 'ZNF345', 'ZFP2', 'ZNF671', 'ZNF790', 'ZNF643', 'ZBTB24', 'ZBTB17', 'ZNF627', 'ZNF845', 'PEG3', 'ZNF483', 'ZNF260', 'ZNF586', 'ZNF16', 'HIC1', 'ZNF737', 'PRDM9', 'ZNF169', 'ZNF652', 'ZNF391', 'ZNF574', 'ZNF224', …
ABC_membrane:54:q	23	11	15	11	6.9213	19456	0.00028831	0.000839835	274	68	108	8	['ABCC4', 'CFTR', 'ABCB5', 'ABCB4', 'ABCB1', 'ABCC10', 'ABCC12', 'ABCC9']
C2-set_2:55:s	23	11	12	11	6.53664	19456	0.00028831	0.000839835	90	411	141	6	['CADM1', 'CADM2', 'CADM3', 'PVRL1', 'CD274', 'BTN1A1']
Ank_4:38:a	23	11	16	11	3.05506	19456	0.00028831	0.000839835	55	519	1575	9	['TNKS2', 'RIPK4', 'TNKS', 'ASB2', 'ANKRD42', 'DYSFIP1', 'ASB11', 'ANKRD16', 'ANKFY1']
Filamin:90:v	23	11	13	11	5.42826	19456	0.00028831	0.000839835	103	28	304	4	['FLNB', 'FLNA', 'FLNC', 'KDELC1']
Filament:247:a	23	11	21	11	7.00377	19456	0.00028831	0.000839835	312	104	102	13	['KRT14', 'KRT72', 'LMNA', 'VIM', 'KRT80', 'KRT5', 'KRT17', 'KRT31', 'KRT32', 'KRT6B', 'KRT9', 'KRT71', 'INA']
zf-C2H2:18:r	352	323	283	284	5.91727	19456	0.000295206	0.000859385	23	1207	3315	172	['ZNF213', 'ZNF530', 'ZNF146', 'ZSCAN5B', 'PRDM16', 'ZNF283', 'ZNF212', 'ZNF132', 'ZNF182', 'ZNF878', 'ZNF792', 'ZNF256', 'ZNF35', 'ZNF705A', 'ZNF484', 'ZNF777', 'ZSCAN12', 'ZNF215', 'ZNF71', 'ZNF614', 'ZNF345', 'ZNF550', 'ZNF776', 'ZNF791', 'ZFP37', 'ZNF627', 'ZFX', 'ZNF33B', 'ZNF813', 'ZNF480', 'ZNF83', 'ZNF766', 'ZNF28', 'ZNF251', 'ZNF783', 'ZNF534', 'ZNF415', 'ZNF740', 'ZNF660', 'ZNF768', 'ZN…
C2:23:d	64	44	42	42	5.84657	19456	0.000299405	0.000870521	103	325	633	29	['PRKCG', 'PLCH1', 'ITSN1', 'CPNE9', 'UNC13A', 'PRKCB', 'MCTP1', 'CPNE2', 'CPNE6', 'SYT4', 'PRF1', 'PLA2G4D', 'RASAL2', 'ESYT2', 'BAIAP3', 'PCLO', 'UNC13D', 'UNC13B', 'MCTP2', 'SYT7', 'PLCB2', 'DYSF', 'SYT3', 'UNC13C', 'PLCZ1', 'SYT9', 'RPGRIP1L', 'SYT11', 'PLCB3']
VWA:153:s	26	13	16	13	5.89887	19456	0.000303374	0.000880408	175	144	248	8	['MATN4', 'VIT', 'ANTXR1', 'COL12A1', 'ITIH1', 'COL6A3', 'COL14A1', 'COL6A6']
Ion_trans_2:49:d	26	13	16	13	6.57694	19456	0.000303374	0.000880408	79	131	155	8	['KCNK6', 'KCNK9', 'KCNK13', 'KCNK10', 'KCNT2', 'KCNK5', 'KCNK3', 'KCNK1']
BACK:44:q	26	13	19	13	7.19486	19456	0.000303374	0.000880408	103	106	101	10	['KLHL5', 'KLHL26', 'KLHL9', 'KLHL22', 'KLHL7', 'KLHL4', 'KBTBD3', 'KBTBD7', 'KLHL36', 'KLHL24']
Hormone_recep:60:e	27	14	17	14	6.70784	19456	0.000304785	0.000883401	208	153	147	12	['RARG', 'NR1H2', 'HNF4A', 'NR4A1', 'RXRA', 'PGR', 'Q8N8C9', 'HNF4G', 'NR5A2', 'RARA', 'NR1H4', 'VDR']
RhoGEF:124:p	27	14	21	14	6.22804	19456	0.000304785	0.000883401	181	200	205	9	['ARHGEF1', 'NGEF', 'ARHGEF18', 'MCF2', 'PREX2', 'PREX1', 'PLEKHG1', 'RASGRF2', 'ARHGEF15']
C2:37:k	66	46	46	46	5.89096	19456	0.000307059	0.000889439	103	325	633	32	['RASAL2', 'CPNE5', 'ESYT2', 'RASA1', 'TC2N', 'SYT5', 'RIMS3', 'CPNE4', 'RASA2', 'MYOF', 'HECW2', 'PLCB4', 'UNC13B', 'CPNE7', 'OTOF', 'PLCB2', 'CAPN6', 'KIAA0528', 'RPH3A', 'SYT1', 'RIMS2', 'DAB2IP', 'ESYT1', 'ESYT3', 'SYT2', 'RASA3', 'UNC13D', 'BAIAP3', 'DYSF', 'C2CD4C', 'PRF1', 'SYT16']
Histone:52:i	36	21	36	21	8.36836	19456	0.000308209	0.000892216	132	61	62	6	['HIST1H2AA', 'H2AFX', 'H2BFWT', 'HIST1H2AM', 'HIST1H2BA', 'HIST2H2AC']
Mito_carr:17:a	35	20	24	20	6.25401	19456	0.000310907	0.000897233	97	100	261	14	['SLC25A23', 'SLC25A45', 'UCP3', 'SLC25A6', 'SLC25A13', 'MCART2', 'SLC25A20', 'SLC25A38', 'SLC25A17', 'SLC25A25', 'SLC25A40', 'SLC25A39', 'MCART1', 'SLC25A47']
Nebulin:1:D	35	20	13	19	5.54045	19456	0.000310907	0.000897233	29	13	428	2	['NEB', 'NRAP']
Ion_trans:115:g	105	81	68	75	6.29134	19456	0.000313984	0.00090499	245	359	763	32	['KCNA5', 'KCND3', 'SCN5A', 'SCN2A', 'KCNH6', 'HCN1', 'CACNA1E', 'CACNA1H', 'SCN1A', 'KCNH2', 'CACNA1F', 'SCN9A', 'TRPV3', 'CACNA1D', 'CACNA1S', 'CACNA1C', 'TRPM3', 'KCNC3', 'SCN11A', 'SCN3A', 'SCN10A', 'TRPC1', 'KCNH7', 'TRPM6', 'KCND2', 'KCNA3', 'TRPA1', 'TRPM1', 'KCNV2', 'KCNV1', 'RYR1', 'CACNA1A']
Ldl_recept_a:33:D	53	35	50	34	6.64215	19456	0.000323362	0.000930867	37	82	302	19	['LRP1B', 'LRP2', 'VLDLR', 'LDLRAD1', 'LRP12', 'TMPRSS6', 'C7', 'CORIN', 'SORL1', 'NETO2', 'RXFP1', 'LRP5', 'LRP1', 'LDLR', 'RXFP2', 'LRP4', 'C10orf112', 'DGCR2', 'HSPG2']
Pkinase:254:t	86	64	55	62	5.24239	19456	0.000335297	0.000964626	264	1221	1293	44	['ROCK1', 'PAK1', 'MAP3K6', 'CAMK2G', 'PKN1', 'MAPK9', 'SgK269', 'WEE2', 'PAK3', 'STK38', 'PRKACA', 'CAMKK2', 'CLK2', 'CDK2', 'CDK14', 'CDK20', 'PRKG1', 'RAGE', 'LATS1', 'CDKL3', 'MAST4', 'LATS2', 'SgK495', 'RPS6KA2', 'STRADA', 'STRADB', 'PIM2', 'AAK1', 'CAMK1D', 'SBK2', 'STK40', 'MOS', 'MELK', 'TRIO', 'PDIK1L', 'RPS6KA6', 'PAK7', 'DMPK', 'PRKG2', 'STK32B', 'IRAK3', 'CDK4', 'MYO3A', 'TNIK']
7tm_4:25:l	74	53	71	52	6.53553	19456	0.000339121	0.000974423	280	469	454	51	['OR51A7', 'OR52N4', 'OR56A3', 'OR6A2', 'OR14C36', 'OR8H2', 'OR10K2', 'OR51B6', 'OR10W1', 'OR8S1', 'OR10G6', 'OR2L3', 'OR2T6', 'OR10A3', 'OR2L2', 'OR5H6', 'OR52L1', 'OR2M3', 'OR5M3', 'OR2V2', 'OR5I1', 'OR4D9', 'OR5AS1', 'OR7E24', 'OR56A1', 'OR5M10', 'OR2G2', 'OR10A4', 'OR4E2', 'OR4C15', 'OR2T34', 'OR52E8', 'OR6V1', 'OR8B12', 'OR2AG1', 'OR4C46', 'OR4C6', 'OR4A15', 'OR2W1', 'OR52I2', 'OR4A47', 'OR8…
EGF_CA:37:e	74	53	56	52	5.59555	19456	0.000339121	0.000974423	42	189	871	25	['FBN2', 'CD93', 'LTBP3', 'LRP2', 'LTBP2', 'MATN4', 'NELL1', 'CRELD2', 'FBLN7', 'THBS4', 'FBLN5', 'FBLN1', 'PROS1', 'GAS6', 'LRP1', 'FBN3', 'MATN2', 'EFEMP2', 'FBLN2', 'LTBP1', 'HMCN1', 'MASP2', 'TLL2', 'FBN1', 'MEGF6']
Trypsin:28:g	24	12	22	12	5.93024	19456	0.000349785	0.00100135	221	210	224	18	['KLK8', 'PRSS3', 'F9', 'CELA1', 'PRSS22', 'KLK5', 'CORIN', 'PLAU', 'TPSAB1', 'PRSS23', 'HGF', 'PRSS12', 'GZMA', 'CELA2B', 'GZMH', 'PRSS36', 'PROC', 'GZMM']
p450:175:k	24	12	23	12	6.93024	19456	0.000349785	0.00100135	463	102	112	10	['CYP2A13', 'CYP2C9', 'CYP3A4', 'CYP2C19', 'CYP2C18', 'CYP2A6', 'CYP24A1', 'CYP2S1', 'CYP2C8', 'CYP2F1']
Cadherin_C_2:77:g	24	12	20	12	7.52814	19456	0.000349785	0.00100135	85	86	74	12	['PCDHGA1', 'PCDHB14', 'PCDHGA9', 'PCDHGA6', 'PCDHGB4', 'PCDHA7', 'PCDHG', 'PCDHGA8', 'PCDHB15', 'PCDHB7', 'PCDHAC2', 'PCDHGA3']
ABC_tran:81:s	24	12	20	12	6.13026	19456	0.000349785	0.00100135	137	141	195	11	['ABCA5', 'ABCA9', 'ABCG8', 'ABCC4', 'ABCG1', 'ABCA6', 'ABCC1', 'ABCB8', 'ABCA3', 'ABCB4', 'ABCC12']
hEGF:18:C	46	29	27	29	5.32084	19456	0.000350739	0.00100234	22	104	655	8	['NOTCH3', 'CRB2', 'SNED1', 'NOTCH4', 'NOTCH1', 'SLIT2', 'JAG2', 'MEGF6']
C2:56:e	67	47	46	46	5.91266	19456	0.000352562	0.00100682	103	325	633	30	['CCDC33', 'TC2N', 'CPNE4', 'RIMS2', 'RIMS4', 'PRF1', 'SYT12', 'PLCD4', 'TOLLIP', 'WWP1', 'SYT13', 'CPNE9', 'SYT14', 'DYSF', 'MYOF', 'OTOF', 'SYT10', 'ESYT3', 'SYT9', 'SYT2', 'RPH3A', 'RPGRIP1', 'DOC2A', 'ESYT2', 'RASAL1', 'KIAA0528', 'CPNE5', 'SYT3', 'SYT5', 'UNC13A']
C2:66:e	69	49	47	45	5.95509	19456	0.00036055	0.00102837	103	325	633	29	['DYSF', 'PIK3C2B', 'ESYT1', 'SYT12', 'OTOF', 'HECW1', 'SYT14', 'PIK3C2G', 'PLCZ1', 'PCLO', 'CPNE7', 'PLCD1', 'PLCL1', 'PLCH1', 'SYT10', 'CC2D1B', 'MCTP1', 'NEDD4L', 'PLCE1', 'SYTL5', 'RPH3A', 'RPGRIP1', 'PLCB3', 'PLCD4', 'SYNGAP1', 'SYT4', 'SYT9', 'CPNE5', 'CPNE8']
Spectrin:51:a	42	26	30	26	5.12499	19456	0.000374205	0.00106536	105	94	685	9	['SPTBN1', 'SPTB', 'ACTN4', 'DST', 'SPTBN2', 'SPTBN5', 'SPTAN1', 'TRIO', 'MACF1']
Ion_trans:126:s	79	58	54	58	5.88087	19456	0.000377226	0.00107331	245	359	763	33	['CACNA1A', 'SCN1A', 'SCN3A', 'HCN3', 'KCNQ5', 'SCN5A', 'CACNA1H', 'KCNH6', 'KCNC2', 'TRPM6', 'NALCN', 'ITPR2', 'SCN10A', 'CACNA1D', 'SCN2A', 'TRPC1', 'HCN1', 'KCND3', 'CACNA1C', 'SCN8A', 'CACNA1F', 'KCNH1', 'CATSPER2', 'CATSPER1', 'HCN2', 'TRPM4', 'TRPV1', 'SCN4A', 'SCN11A', 'CACNA1B', 'KCNQ3', 'CACNA1E', 'TRPV4']
Pkinase:182:s	77	56	57	56	5.08291	19456	0.000378117	0.00107518	264	1221	1293	46	['PRKCA', 'LIMK2', 'DCLK1', 'MAK', 'CAMK1G', 'ROCK2', 'TBK1', 'ACVR1', 'MAPK13', 'CSNK1A1L', 'CSNK1A1', 'TSSK3', 'CAMK2D', 'MYO3A', 'RIPK4', 'BRSK1', 'CAMKV', 'OXSR1', 'PRKCG', 'SCYL2', 'DYRK2', 'PAK4', 'CDKL5', 'TTK', 'TTBK1', 'MAPK8', 'PRKCZ', 'MOS', 'EIF2AK4', 'PAK3', 'LRRK2', 'MAPKAPK3', 'GRK4', 'CDKL2', 'ICK', 'TAOK1', 'MASTL', 'PRKD1', 'MAST4', 'TAOK2', 'ROCK1', 'EIF2AK2', 'MELK', 'MYO3B', …
fn3:3:P	116	92	94	89	4.45171	19456	0.000394325	0.00111922	85	419	3017	46	['ITGB4', 'IGDCC4', 'TTN', 'EGFLAM', 'COL12A1', 'FNDC4', 'NRCAM', 'NCAM2', 'MYOM1', 'IL7R', 'SDK2', 'ROBO2', 'TEK', 'MYOM3', 'IGSF9', 'COL20A1', 'EPHB4', 'EPHA5', 'SDK1', 'TNR', 'EPHA8', 'ROBO3', 'DSCAML1', 'VWA1', 'MYBPHL', 'NEO1', 'PTPRF', 'OBSCN', 'DCC', 'PRTG', 'AXL', 'NPHS1', 'MYOM2', 'PTPRD', 'FNDC1', 'ROBO4', 'ABI3BP', 'IL27RA', 'ROS1', 'MYBPC2', 'LRFN2', 'PTPRB', 'EPHB1', 'FN1', 'TNN', 'C…
Ank_2:78:a	70	50	54	49	4.66536	19456	0.000406826	0.00115329	84	529	1570	33	['ANKRD23', 'ANK2', 'NOTCH1', 'EHMT2', 'FEM1C', 'ANKRD42', 'ASB10', 'ANKRD52', 'ANK1', 'ILK', 'TRPV6', 'CLPB', 'ASB4', 'ASB13', 'ANKHD1', 'RNASEL', 'TRPA1', 'PPP1R16B', 'MPHOSPH8', 'ANKRD26', 'OSBPL1A', 'ANKRD5', 'ANKFY1', 'ASB2', 'ANKRD45', 'NOTCH3', 'PPP1R16A', 'NOTCH4', 'ANKRD50', 'PSMD10', 'ANKRD16', 'ASB14', 'ASB5']
CUB:45:d	70	50	36	50	6.74275	19456	0.000406826	0.00115329	110	128	372	8	['CSMD2', 'CUBN', 'DMBT1', 'CSMD3', 'BMP1', 'EGFL4', 'TNFAIP6', 'OVCH1']
7tm_1:193:t	55	37	38	37	5.2146	19456	0.000453544	0.00128183	268	839	843	26	['GPR45', 'OPRM1', 'QRFPR', 'DRD5', 'GPR119', 'LPAR1', 'HTR2C', 'NPBWR2', 'NPSR1', 'GPR50', 'ADRA1A', 'ADRA1B', 'OPN3', 'OXTR', 'OPRK1', 'HTR1F', 'TAAR8', 'TACR3', 'HRH2', 'OPRD1', 'ADORA1', 'MC1R', 'TAAR5', 'HCRTR2', 'LPAR3', 'HTR1B']
Ldl_recept_a:24:g	57	39	55	39	6.74711	19456	0.000480523	0.00135478	37	82	302	19	['LRP1B', 'SORL1', 'LRP1', 'LRP2', 'LRP3', 'CD320', 'LRP4', 'LDLRAD3', 'LDLR', 'C6', 'RXFP2', 'VLDLR', 'LRP6', 'C8A', 'LRP12', 'TMPRSS3', 'C8B', 'NETO2', 'RXFP1']
TSP_1:36:g	57	39	48	37	6.22397	19456	0.000480523	0.00135478	49	105	434	26	['ADAMTS17', 'HMCN1', 'ADAMTS16', 'PAPLN', 'ADAMTS3', 'ADAMTS20', 'THSD7A', 'ADAMTS7', 'BAI2', 'ADAMTS14', 'ADAMTSL4', 'UNC5C', 'SEMA5B', 'ADAMTS12', 'UNC5D', 'C8B', 'ADAMTS6', 'C7', 'SEMA5A', 'BAI3', 'THSD7B', 'CILP', 'C6', 'CFP', 'UNC5B', 'ADAMTS2']
UDPGT:232:r	29	16	28	16	8.45602	19456	0.000489085	0.00137642	499	41	47	10	['UGT2B4', 'UGT2B10', 'UGT2A1', 'UGT1A7', 'UGT2B17', 'UGT2B15', 'UGT3A2', 'UGT1A9', 'UGT2B28', 'UGT1A8']
fn3:10:e	172	146	128	134	5.02	19456	0.000510353	0.00143541	85	419	3017	49	['TNN', 'MYBPC1', 'FNDC3A', 'COL12A1', 'USH2A', 'CNTN4', 'PTPRD', 'TTN', 'MYBPC3', 'VWA1', 'TNC', 'COL20A1', 'TNXB', 'EPHA3', 'IGDCC3', 'CNTN2', 'DCC', 'FN1', 'PTPRO', 'NCAM2', 'ROS1', 'TNR', 'CNTN3', 'NRCAM', 'MYBPC2', 'TYRO3', 'FNDC1', 'MYBPHL', 'COL14A1', 'MYOM2', 'ROBO1', 'SDK2', 'CMYA5', 'PTPRZ1', 'SDK1', 'IL6ST', 'DSCAM', 'LIFR', 'EGFLAM', 'EPHA8', 'PTPRB', 'SNED1', 'EPHB4', 'CNTN5', 'NFASC…
BACK:91:p	21	10	16	10	6.88674	19456	0.000534142	0.00148881	103	106	101	12	['KBTBD8', 'KLHL24', 'KLHL22', 'IPP', 'KLHL13', 'KLHL6', 'KBTBD5', 'KLHL38', 'KEAP1', 'KLHL32', 'KLHL34', 'KBTBD10']
Filament:212:r	21	10	20	10	6.87252	19456	0.000534142	0.00148881	312	104	102	12	['KRT33B', 'NEFM', 'KRT1', 'KRT6A', 'DES', 'KRT3', 'KRT75', 'VIM', 'KRT18', 'KRT15', 'KRT7', 'KRT82']
TGF_beta:34:G	21	10	16	10	8.02138	19456	0.000534142	0.00148881	105	46	46	8	['BMP2', 'BMP15', 'GDNF', 'GDF5', 'GDF15', 'TGFB2', 'BMP5', 'MSTN']
BACK:77:r	21	10	19	10	6.88674	19456	0.000534142	0.00148881	103	106	101	15	['KLHL14', 'KLHL7', 'IPP', 'KBTBD6', 'KLHL23', 'KEAP1', 'KBTBD4', 'ENC1', 'KLHL29', 'KLHL6', 'KBTBD2', 'KBTBD8', 'KLHL38', 'KLHL28', 'KBTBD5']
P53_tetramer:23:E	21	10	10	10	8.79006	19456	0.000534142	0.00148881	42	27	27	2	['TP63', 'TP53']
Neur_chan_LBD:210:l	21	10	19	10	7.03715	19456	0.000534142	0.00148881	216	88	91	5	['CHRNB4', 'GABRG1', 'GABRA3', 'GABRB3', 'GABRA5']
ANF_receptor:236:r	21	10	14	10	7.03715	19456	0.000534142	0.00148881	352	92	91	9	['GRM6', 'GRM7', 'GRIK3', 'GRIK1', 'GRM8', 'GRID1', 'GRIA2', 'GRID2', 'GRIK4']
E1-E2_ATPase:92:e	21	10	14	10	6.33549	19456	0.000534142	0.00148881	221	117	148	5	['ATP2B3', 'ATP2B2', 'ATP11A', 'ATP10A', 'ATP8B1']
p450:434:e	21	10	20	10	6.73759	19456	0.000534142	0.00148881	463	102	112	14	['CYP4F2', 'CYP2A13', 'CYP2A6', 'CYP4A11', 'CYP11A1', 'CYP4A22', 'CYP4F3', 'CYP3A7', 'CYP2C8', 'CYP24A1', 'CYP1A1', 'CYP7A1', 'CYP19A1', 'CYP2U1']
FERM_M:19:k	21	10	15	10	6.6623	19456	0.000534142	0.00148881	118	118	118	11	['URP2', 'NF2', 'FERMT3', 'MYLIP', 'EPB41L3', 'PTPN13', 'TLN1', 'MYO10', 'FRMD4A', 'FRMD4B', 'PLEKHH1']
Ank_2:4:A	38	23	28	22	3.78401	19456	0.000532154	0.00148881	84	529	1570	24	['DGKZ', 'ANKRD30BL', 'ASAP3', 'ANK1', 'MYO16', 'RAI14', 'ANKRD29', 'KANK1', 'ASB16', 'ANK2', 'ANKRD27', 'ESPNL', 'GABPB1', 'POTEC', 'NOTCH2', 'BARD1', 'ASB7', 'EHMT1', 'NFKBIE', 'TANC1', 'TNKS', 'GABPB2', 'ASB14', 'TRPV6']
UDPGT:298:A	21	10	3	9	7.99036	19456	0.000534142	0.00148881	499	41	47	10	['UGT1A7', 'UGT1A1', 'UGT1A4', 'UGT1A5', 'UGT1A8', 'UGT1A10', 'UGT1A6', 'UGT1A9', 'UGT3A2', 'UGT1A3']
Filamin:68:d	25	13	14	13	5.54856	19456	0.000551184	0.00152807	103	28	304	3	['FLNC', 'FLNB', 'FLNA']
ig:79:s	25	13	18	13	2.72368	19456	0.000551184	0.00152807	87	1005	2154	8	['NTRK3', 'EMB', 'LILRB4', 'IGLON5', 'LILRA2', 'VCAM1', 'MYOM3', 'CD4']
TSP_1:5:e	65	46	54	46	6.41345	19456	0.000551032	0.00152807	49	105	434	26	['ADAMTS16', 'THBS2', 'UNC5D', 'THSD7B', 'C8B', 'ADAMTS6', 'ADAMTS20', 'ADAMTS2', 'ADAMTSL3', 'C6', 'THSD4', 'ADAMTS15', 'THSD7A', 'THBS1', 'ADAMTS1', 'ADAMTS18', 'BAI3', 'CFP', 'BAI2', 'ADAMTS12', 'ADAMTS13', 'C7', 'HMCN1', 'SEMA5A', 'ADAMTS17', 'UNC5C']
p450:298:k	25	13	23	13	6.98913	19456	0.000551184	0.00152807	463	102	112	13	['CYP17A1', 'CYP2U1', 'CYP4F3', 'CYP20A1', 'CYP11B2', 'CYP2A6', 'CYP4Z1', 'CYP11B1', 'CYP2W1', 'CYP2F1', 'CYP2D6', 'CYP4F2', 'CYP3A43']
SRCR:42:g	25	13	21	13	5.71967	19456	0.000551184	0.00152807	100	56	270	8	['LOXL2', 'SRCRB4D', 'CD163', 'LOXL3', 'DMBT1', 'CD163L1', 'CD6', 'CD5L']
VWA:101:e	25	13	22	13	5.84229	19456	0.000551184	0.00152807	175	144	248	7	['COL6A6', 'CACNA2D1', 'COL7A1', 'COL22A1', 'FLJ35880', 'VWF', 'ITGA2']
RhoGEF:65:e	33	19	19	19	6.51754	19456	0.000554027	0.00153504	181	200	205	6	['NGEF', 'ECT2', 'ARHGEF17', 'SOS1', 'PREX2', 'SOS2']
Sushi:8:p	131	107	90	104	6.52784	19456	0.00057799	0.00159668	56	146	808	22	['SEZ6L2', 'CFHR3', 'CFHR5', 'CSMD3', 'CSMD2', 'CFHR1', 'CFH', 'CR2', 'CFHR4', 'CR1', 'BCAN', 'C4BPA', 'C7', 'CD46', 'CD55', 'F13B', 'APOH', 'CR1L', 'PAPPA', 'CFHR2', 'SUSD4', 'SELE']
hEGF:7:C	50	33	31	33	5.44113	19456	0.000585307	0.00161498	22	104	655	14	['NOTCH1', 'JAG2', 'NOTCH2', 'FBN2', 'CRB1', 'DNER', 'SLIT1', 'NOTCH3', 'SLIT2', 'FBN3', 'NOTCH4', 'JAG1', 'DLL1', 'MEGF6']
PH:66:r	44	28	37	28	5.58415	19456	0.000591715	0.00163072	105	511	522	25	['PLEKHO2', 'PLEKHA5', 'FGD5', 'TBC1D2', 'ARAP1', 'AFAP1L1', 'PLEKHA1', 'SNTB1', 'PRKD3', 'ACAP2', 'FARP1', 'APPL2', 'CNKSR1', 'FGD6', 'AFAP1', 'ARAP2', 'AKT2', 'PHLDB2', 'ARHGAP25', 'FAM109B', 'PLEKHB1', 'RASAL1', 'PLEKHF1', 'RASA1', 'PLEKHA4']
Pkinase:70:k	86	65	57	65	5.24239	19456	0.000603593	0.00166051	264	1221	1293	43	['RPS6KA4', 'DYRK3', 'NRK', 'AURKB', 'MAP2K4', 'UHMK1', 'PASK', 'CDK17', 'CDC42BPA', 'HIPK3', 'ERN1', 'CAMKV', 'PSKH1', 'MYLK2', 'PRKACB', 'TAOK2', 'NEK8', 'TBCK', 'DAPK2', 'NEK11', 'CDK19', 'PSKH2', 'TTN', 'CDK1', 'CAMK1G', 'GRK4', 'RPS6KA6', 'TNIK', 'MAP3K2', 'TRIB1', 'TSSK1B', 'CDK5', 'MAP2K1', 'SIK1', 'SBK2', 'ACVR2B', 'CHUK', 'BUB1', 'EIF2AK4', 'DYRK1A', 'STK17A', 'MAP4K3', 'TRIB3']
RhoGAP:75:e	22	11	19	11	6.12825	19456	0.000618455	0.00169638	152	178	179	13	['CHN1', 'ABR', 'ARHGAP40', 'OCRL', 'ARHGAP8', 'ARHGAP29', 'ARHGAP39', 'DEPDC1B', 'SH3BP1', 'ARHGAP36', 'SRGAP1', 'ARHGAP30', 'SYDE1']
C1_1:26:k	22	11	15	11	6.46231	19456	0.000618455	0.00169638	53	190	142	8	['PRKCQ', 'UNC13B', 'CHN2', 'PRKCE', 'PRKD1', 'PRKD3', 'UNC13C', 'DGKD']
PHD:23:r	22	11	18	11	6.01215	19456	0.000618455	0.00169638	52	167	194	12	['PHF13', 'DPF2', 'CHD3', 'CHD4', 'JHDM1D', 'TIF1', 'BAZ1B', 'PHF21A', 'TRIM24', 'MLL3', 'MLL', 'KMT2D']
MFS_1:70:l	22	11	20	11	5.64628	19456	0.000618455	0.00169638	353	229	250	11	['MFSD8', 'SLC16A12', 'SLC22A7', 'SLC18A2', 'SLC16A9', 'SV2C', 'SLC16A6', 'SV2B', 'SLC17A8', 'SLC16A4', 'SLC16A10']
P53:44:a	52	35	15	35	9.80867	19456	0.000619425	0.00169804	196	33	33	1	['TP53']
Cadherin:80:p	209	183	167	166	6.44742	19456	0.000626445	0.00171425	93	227	1363	71	['FAT3', 'PCDHAC2', 'CDHR2', 'PCDHA2', 'DCHS1', 'FAT2', 'CDH5', 'PCDHA13', 'PCDHB15', 'PCDHB8', 'PCDHB3', 'PCDHA9', 'FAT4', 'PCDHA8', 'PCDH19', 'PCDH12', 'PCDHGA7', 'CDH9', 'CDH19', 'CDH15', 'FAT', 'PCDH10', 'CDH10', 'PCDHA1', 'CELSR2', 'PCDHA12', 'PCDHAC1', 'DSC2', 'PCDHGA11', 'PCDHG', 'PCDHA6', 'PCDHB6', 'PCDHGA6', 'PCDHB14', 'PCDHA10', 'PCDHA7', 'PCDHB13', 'CDH17', 'CDH2', 'PCDHGA3', 'PCDHA5',…
fn3:65:p	161	136	122	130	4.92465	19456	0.000630839	0.00172526	85	419	3017	49	['DCC', 'IGDCC3', 'FLRT2', 'NRCAM', 'USH2A', 'ROBO2', 'EPHA3', 'EPHA7', 'ANKFN1', 'COL7A1', 'IL31RA', 'EPOR', 'PTPRU', 'EPHA5', 'TNXB', 'TTN', 'COL12A1', 'PTPRO', 'CNTN3', 'FN1', 'PTPRJ', 'SDK2', 'TNN', 'PTPRH', 'COL14A1', 'FNDC3A', 'MYBPH', 'EPHA2', 'AXL', 'PTPRM', 'ROBO1', 'EPHB3', 'TNC', 'VWA1', 'IGDCC4', 'FNDC3B', 'TNR', 'IL12RB2', 'PTPRG', 'MYBPC3', 'DSCAM', 'SDK1', 'LRFN3', 'NFASC', 'CNTN6'…
P53:50:q	66	47	19	47	10.1526	19456	0.000631478	0.00172599	196	33	33	1	['TP53']
TSP_1:7:s	46	30	38	30	5.91464	19456	0.000653417	0.00178177	49	105	434	21	['ADAMTSL2', 'SEMA5B', 'ADAMTS3', 'ADAMTS20', 'ADAMTS12', 'ADAMTS7', 'PAPLN', 'ADAMTS19', 'THSD7B', 'ADAMTS17', 'CTGF', 'HMCN1', 'C8A', 'ADAMTSL3', 'ADAMTS6', 'C7', 'ADAMTS16', 'THSD7A', 'THBS2', 'UNC5D', 'BAI2']
Laminin_EGF:8:s	46	30	42	29	6.19641	19456	0.000653417	0.00178177	49	68	357	19	['CELSR2', 'LAMA2', 'LAMB3', 'PEAR1', 'LAMA5', 'USH2A', 'LAMB4', 'LAMA1', 'LAMB1', 'NTNG1', 'LAMC3', 'NTN4', 'LAMC1', 'NTNG2', 'SCARF1', 'NTN1', 'LAMB2', 'MEGF11', 'LAMA3']
Sushi:51:p	123	100	89	89	6.43693	19456	0.000676907	0.0018415	56	146	808	20	['CSMD3', 'CR1', 'C4BPA', 'CSMD2', 'SEZ6', 'F13B', 'CR2', 'CD46', 'SUSD1', 'PAPPA', 'CFH', 'SEZ6L2', 'CFHR5', 'VCAN', 'CR1L', 'SRPX2', 'CFHR4', 'SUSD4', 'MASP2', 'APOH']
ABC_tran:40:G	30	17	23	17	6.45219	19456	0.000692705	0.00187899	137	141	195	14	['ABCC2', 'ABCA9', 'ABCC9', 'ABCA2', 'ABCB9', 'ABCC11', 'ABCB1', 'ABCA6', 'ABCB11', 'ABCC12', 'ABCC1', 'ABCD4', 'ABCA5', 'TAP2']
SH3_1:15:s	30	17	20	17	4.75346	19456	0.000692705	0.00187899	48	489	633	15	['SH3RF2', 'SORBS1', 'CSK', 'NCK2', 'YES1', 'EPS8L1', 'VAV1', 'TRIP10', 'BCAR1', 'SH3RF3', 'HCLS1', 'STAC', 'SKAP2', 'EPS8L2', 'SRGAP3']
Cadherin_2:64:E	30	17	22	15	7.07084	19456	0.000692705	0.00187899	83	178	127	14	['PCDHA10', 'PCDHA2', 'PCDHGA7', 'PCDHA13', 'PCDHGB3', 'PCDHA1', 'PCDHB6', 'PCDHB3', 'PCDHA8', 'PCDHB11', 'PCDH10', 'PCDHB2', 'PCDHA11', 'PCDHB5']
Cadherin_2:78:e	30	17	23	17	7.07084	19456	0.000692705	0.00187899	83	178	127	16	['PCDHB3', 'PCDHAC1', 'PCDHB11', 'PCDH11X', 'PCDH19', 'PCDHA8', 'PCDHA9', 'PCDHAC2', 'PCDHA7', 'PCDHA12', 'PCDHB2', 'PCDHGA6', 'PCDHA10', 'PCDHB10', 'PCDH10', 'PCDHGB3']
SH3_1:9:e	35	21	23	21	4.97585	19456	0.000698448	0.00189346	48	489	633	15	['BTK', 'SH3PXD2B', 'YES1', 'ARHGAP4', 'SH3RF1', 'VAV1', 'NCF1', 'DNMBP', 'SH3GL1', 'SRGAP1', 'BCAR1', 'SRGAP3', 'ITSN2', 'SH3PXD2A', 'FGR']
EGF_CA:41:k	71	52	59	50	5.53585	19456	0.000703149	0.00190288	42	189	871	17	['LTBP2', 'FBN2', 'FBN3', 'THBS3', 'HMCN1', 'NID1', 'MATN2', 'FBN1', 'PROS1', 'EFEMP2', 'LTBP3', 'EMR2', 'EGF', 'MATN3', 'NID2', 'LTBP1', 'FBLN1']
Pkinase:39:k	71	52	47	51	4.96587	19456	0.000703149	0.00190288	264	1221	1293	38	['TLK2', 'IKBKB', 'CAMK1G', 'PKN3', 'CDK4', 'PRKX', 'PRKCB', 'STK11', 'NEK9', 'CAMK2A', 'CSNK1D', 'STK33', 'CDKL1', 'GRK7', 'MYLK2', 'UHMK1', 'TGFBR1', 'CAMKK1', 'MOS', 'CSNK1A1L', 'TSSK1B', 'PAK3', 'ACVR2B', 'MAPK1', 'CSNK1E', 'MAST1', 'MAP3K3', 'SRPK2', 'MINK1', 'HUNK', 'STK36', 'DCLK1', 'ADRBK1', 'STK38', 'MAP2K3', 'TBK1', 'AKT2', 'RPS6KA6']
WD40:32:g	183	158	128	151	6.06378	19456	0.000717479	0.00194053	38	506	1557	62	['DMWD', 'LOC340578', 'AAMP', 'FBXW7', 'RFWD2', 'WDR49', 'KIF21A', 'COPA', 'ENSG00000241322', 'CDC20B', 'CSTF1', 'EML4', 'TBL1XR1', 'RBBP7', 'WDR82', 'TLE3', 'WDR7', 'GNB3', 'WDR88', 'CDC20', 'FBXW11', 'GNB4', 'WDR36', 'ATG16L2', 'PAK1IP1', 'TAF5', 'WDR38', 'TAF5L', 'SPAG16', 'WDR16', 'PLRG1', 'PAFAH1B1', 'WDR23', 'WDR75', 'EML3', 'WDHD1', 'PRPF4', 'RBBP4', 'RRP9', 'WDR65', 'SNRNP40', 'ELP2', 'KI…
I-set:1:p	60	42	48	41	3.16774	19456	0.000750143	0.00202182	90	839	3800	18	['IGSF22', 'ROBO2', 'MYBPHL', 'IGSF9', 'BOC', 'TTN', 'NTM', 'HMCN1', 'ROBO1', 'NTRK3', 'IGFBPL1', 'IGFN1', 'MFAP3L', 'OBSCN', 'DSCAM', 'KDR', 'PXDN', 'OBSL1']
CUB:83:d	55	38	35	38	6.39483	19456	0.000764708	0.00205157	110	128	372	10	['CSMD3', 'DMBT1', 'CSMD2', 'PCOLCE2', 'TMPRSS15', 'NRP1', 'CUBN', 'CDCP2', 'TLL1', 'SCUBE2']
Ig_2:56:s	49	33	35	31	4.08084	19456	0.000851399	0.0022802	79	811	1648	22	['VSIG10L', 'FCRL2', 'SIGLEC12', 'PSG9', 'PSG2', 'IGSF1', 'NEO1', 'FCRLB', 'FCRL5', 'SIGLEC10', 'FCGR2B', 'FCRL3', 'LILRA2', 'HSPG2', 'LAIR2', 'BCAM', 'PSG5', 'CD22', 'IGSF9B', 'SIGLEC1', 'FCRL6', 'LILRA4']
Spectrin:101:q	37	23	28	22	4.94212	19456	0.000859017	0.00229663	105	94	685	12	['UTRN', 'SPTBN4', 'SPTBN1', 'SPTBN5', 'SPTBN2', 'SPTAN1', 'CCDC141', 'ACTN4', 'ACTN1', 'MACF1', 'SPTB', 'DST']
Keratin_B2_2:14:s	37	23	32	23	6.75475	19456	0.000859017	0.00229663	45	53	195	16	['KRTAP4-5', 'KRTAP12-1', 'KRTAP10-6', 'KRTAP10-9', 'KRTAP4-11', 'KRTAP10-11', 'KRTAP10-1', 'KRTAP4-6', 'KRTAP9-1', 'KRTAP9-3', 'KRTAP9-8', 'KRTAP4-8', 'KRTAP9-4', 'KRTAP4-4', 'KRTAP4-3', 'KRTAP10-2']
V-set:56:g	54	37	39	36	5.77309	19456	0.000866639	0.00231568	109	958	562	29	['MXRA8', 'BTNL8', 'TIMD4', 'BTNL9', 'TREM1', 'SIGLEC8', 'PVRL3', 'CD300LB', 'SLAMF6', 'CADM2', 'SIGLEC7', 'MPZL3', 'SIGLEC9', 'CD300A', 'HHLA2', 'CD101', 'SCN1B', 'CD83', 'SIGLEC12', 'BTN2A2', 'NPHS1', 'SIRPD', 'PTGFRN', 'SIGLEC6', 'BTNL2', 'LY6G6F', 'HAVCR1', 'CADM1', 'HAPLN1']
Mito_carr:91:r	43	28	38	28	6.55099	19456	0.000895271	0.0023867	97	100	261	13	['SLC25A25', 'SLC25A14', 'SLC25A27', 'SLC25A29', 'SLC25A12', 'SLC25A18', 'SLC25A6', 'SLC25A31', 'SLC25A13', 'SLC25A28', 'SLC25A43', 'SLC25A5', 'SLC25A33']
RhoGEF:10:r	26	14	21	13	6.17359	19456	0.000901437	0.00239902	181	200	205	15	['PLEKHG3', 'ARHGEF12', 'VAV3', 'NGEF', 'SOS1', 'TRIO', 'TIAM1', 'ECT2L', 'FARP2', 'ARHGEF11', 'FARP1', 'VAV1', 'PREX2', 'FGD3', 'OBSCN']
Laminin_G_2:8:G	26	14	18	14	5.81965	19456	0.000901437	0.00239902	126	111	262	9	['NRXN1', 'LAMA2', 'SLIT3', 'CNTNAP5', 'USH2A', 'CNTNAP2', 'LAMA3', 'NRXN2', 'CNTNAP1']
Hormone_recep:203:f	26	14	23	14	6.6534	19456	0.000901437	0.00239902	208	153	147	6	['NR4A2', 'AR', 'RXRB', 'Q8N8C9', 'NR1H4', 'HNF4A']
Hemopexin:22:r	32	19	32	19	7.45219	19456	0.000921914	0.00245071	45	33	104	13	['MMP17', 'MMP11', 'MMP10', 'MMP16', 'MMP24', 'MMP9', 'PRG4', 'MMP1', 'VTN', 'HPX', 'MMP19', 'MMP3', 'MMP20']
Ig_2:7:s	48	32	36	32	4.05109	19456	0.000960252	0.0025468	79	811	1648	21	['PSG8', 'PSG3', 'FCRL2', 'SIGLEC1', 'PSG1', 'CEACAM5', 'IGSF1', 'SIGLEC10', 'SIGLEC12', 'PSG6', 'FCRLB', 'FCRL1', 'HSPG2', 'FCRL3', 'MALT1', 'PSG2', 'PSG9', 'GP6', 'PSG5', 'LILRB5', 'FCRL5']
Pkinase:247:k	66	48	49	44	4.86052	19456	0.0009621	0.00255025	264	1221	1293	39	['CLK1', 'RPS6KA3', 'PLK1', 'TRIB1', 'MAP3K15', 'ACVR2A', 'RPS6KB1', 'DYRK3', 'PNCK', 'MAP2K7', 'NEK11', 'PRKCH', 'TRIB3', 'EIF2AK3', 'DAPK3', 'ADRBK2', 'TTK', 'PRKCQ', 'ULK2', 'MAP3K1', 'CAMK1D', 'CDKL4', 'RPS6KA6', 'HUNK', 'TRAD', 'WNK4', 'STRADA', 'PRKCD', 'TSSK2', 'RPS6KA2', 'CAMKV', 'ACVR1', 'CSNK2A1', 'TBCK', 'ULK1', 'AURKC', 'PAK4', 'MAP3K5', 'STK17B']
CUB:7:e	64	46	38	46	6.61347	19456	0.000977437	0.00258795	110	128	372	11	['CSMD2', 'CSMD3', 'PCOLCE2', 'BMP1', 'TLL1', 'CUBN', 'PDGFC', 'SEZ6', 'TLL2', 'NRP2', 'PCOLCE']
Lectin_C:91:g	31	18	26	18	6.33204	19456	0.000991105	0.00261967	108	165	219	16	['CLEC2D', 'LY75', 'CLEC7A', 'REG1B', 'SFTPD', 'CLEC1A', 'THBD', 'CD209', 'PLA2R1', 'CLEC6A', 'FREM1', 'KLRC3', 'CD93', 'REG3G', 'ATRN', 'NCAN']
Cadherin_C_2:28:r	31	18	26	18	7.89737	19456	0.000991105	0.00261967	85	86	74	15	['PCDHGC5', 'PCDHGA8', 'PCDHB7', 'PCDHGB4', 'PCDHA7', 'PCDHB13', 'PCDHA9', 'PCDHB5', 'PCDHGB3', 'PCDHGA3', 'PCDH10', 'PCDHGB1', 'PCDHB15', 'PCDHB6', 'PCDHGB6']
VWA:76:g	31	18	21	18	6.15263	19456	0.000991105	0.00261967	175	144	248	12	['C2', 'ITIH5L', 'ITIH3', 'ITIH1', 'COL6A3', 'COL6A2', 'COL7A1', 'COL20A1', 'ITGA11', 'CACNA2D1', 'VWA2', 'COL21A1']
7tm_4:257:l	79	60	76	58	6.62986	19456	0.00100589	0.00265574	280	469	454	58	['OR2T4', 'OR51A2', 'OR2L13', 'OR52A1', 'OR10Q1', 'OR2AK2', 'OR51B5', 'OR51L1', 'OR2A7', 'OR6S1', 'OR10AD1', 'OR10G4', 'OR10T2', 'OR2AG2', 'OR2A5', 'OR7G1', 'OR4A16', 'OR8H3', 'OR51V1', 'OR4N5', 'OR4C11', 'OR7G3', 'OR8H1', 'OR56A3', 'OR2L1P', 'OR52J3', 'OR4K2', 'OR51G2', 'OR10H5', 'OR8H2', 'OR8K5', 'OR6C1', 'OR9I1', 'OR4Q3', 'OR6K6', 'OR10A3', 'OR2T27', 'OR56A1', 'OR4M1', 'OR5T2', 'OR52N4', 'OR3A…
RhoGEF:119:e	23	12	15	12	5.99671	19456	0.00101084	0.00265673	181	200	205	9	['MCF2', 'ARHGEF19', 'FGD2', 'ARHGEF10', 'ARHGEF4', 'NET1', 'PLEKHG4B', 'ARHGEF10L', 'SOS2']
TIG:7:s	23	12	19	12	6.52644	19456	0.00101084	0.00265673	85	80	142	7	['PLXNA2', 'PKHD1L1', 'EXOC2', 'CAMTA1', 'MET', 'PKHD1', 'PLXNA4']
ANF_receptor:298:g	23	12	12	12	7.1684	19456	0.00101084	0.00265673	352	92	91	5	['GRIK1', 'GRIA2', 'GRM6', 'GRIA1', 'GRID2']
Filament:101:v	23	12	23	11	7.00377	19456	0.00101084	0.00265673	312	104	102	6	['KRT12', 'KRT15', 'KRT84', 'KRT13', 'KRT14', 'PRPH']
p450:414:G	23	12	23	12	6.86884	19456	0.00101084	0.00265673	463	102	112	13	['CYP2A13', 'CYP2C19', 'CYP4X1', 'CYP1A2', 'CYP2C9', 'CYP2E1', 'CYP2B6', 'CYP4F2', 'CYP4A11', 'CYP4A22', 'CYP11B2', 'CYP27C1', 'CYP27B1']
Filament:309:e	23	12	23	12	7.00377	19456	0.00101084	0.00265673	312	104	102	15	['KRT71', 'VIM', 'KRT8', 'KRT222', 'KRT2', 'KRT37', 'IFFO2', 'KRT39', 'KRT3', 'LMNA', 'KRT81', 'KRT75', 'KRT85', 'KRT32', 'KRT6B']
ANF_receptor:176:r	23	12	17	12	7.1684	19456	0.00101084	0.00265673	352	92	91	12	['GRIA2', 'GRIK4', 'NPR2', 'GRM8', 'GABBR2', 'GRIA3', 'GRM3', 'GRM6', 'GRIA1', 'GRIK3', 'GRM5', 'TAS1R2']
7tm_1:1:g	88	68	75	67	5.89267	19456	0.00101013	0.00265673	268	839	843	44	['APLNR', 'MRGPRX1', 'TAAR6', 'CHRM2', 'CNR2', 'HTR2A', 'NPY5R', 'CCKAR', 'DRD3', 'TACR3', 'CCKBR', 'CCR8', 'CX3CR1', 'NMUR2', 'GPR6', 'MRGPRX2', 'RXFP2', 'ADORA3', 'C5AR1', 'GPR50', 'CCR2', 'PROKR1', 'RXFP3', 'GPR151', 'RXFP1', 'NPFFR2', 'LHCGR', 'HCAR2', 'CYSLTR2', 'PROKR2', 'TRHR', 'P2RY8', 'GPR109B', 'KISS1R', 'CXCR2', 'HTR4', 'OPN5', 'AGTR1', 'RXFP4', 'O3FAR1', 'GPR174', 'MRGPRX4', 'GPR101',…
CUB:8:s	57	40	33	39	6.44636	19456	0.00101868	0.00267281	110	128	372	10	['LRP10', 'CSMD3', 'CUBN', 'TLL2', 'CSMD2', 'TMPRSS15', 'GPR126', 'PDGFD', 'LRP3', 'TLL1']
PDZ:55:g	57	40	43	38	5.53431	19456	0.00101868	0.00267281	82	388	700	31	['INADL', 'CNKSR2', 'GOPC', 'MAGI2', 'PDZRN3', 'GRIP1', 'MPP7', 'SNTG1', 'GIPC3', 'TIAM2', 'LNX1', 'MPP5', 'LIN7B', 'USH1C', 'LIN7A', 'TJP1', 'LIMK2', 'PARD3B', 'IL16', 'LNX2', 'MPDZ', 'TJP2', 'MAGI1', 'APBA2', 'PCLO', 'APBA1', 'CYTIP', 'DLG5', 'PDZD7', 'TAX1BP3', 'SNTG2']
Pkinase:225:e	77	58	65	57	5.08291	19456	0.00103223	0.00270378	264	1221	1293	29	['STK4', 'TNIK', 'HUNK', 'MAP2K7', 'MAP2K5', 'WEE1', 'PRKD3', 'RPS6KA2', 'TLK1', 'GRK4', 'MAP3K1', 'MAP3K2', 'PBK', 'MYO3A', 'MAP3K4', 'MOS', 'PRKG2', 'MINK1', 'PHKG2', 'CHEK1', 'MAP4K1', 'TSSK3', 'CLK2', 'TRAD', 'ENSG00000168038', 'RPS6KA1', 'DYRK2', 'GAK', 'TGFBR1']
C2:11:k	59	42	42	42	5.72921	19456	0.00103209	0.00270378	103	325	633	31	['OTOF', 'PLCD4', 'SYT14', 'ESYT1', 'SYTL1', 'RIMS4', 'DYSF', 'SYT11', 'RIMS2', 'RASA2', 'PLA2G4D', 'MYOF', 'CPNE4', 'CPNE7', 'MCTP1', 'CPNE5', 'CC2D1A', 'SYTL5', 'SYT7', 'PRKCG', 'PCLO', 'ESYT2', 'SYT4', 'PLCB4', 'TC2N', 'SYT1', 'ITSN2', 'PIK3C2B', 'ITSN1', 'PLCB3', 'RIMS1']
Ig_3:2:P	69	51	48	51	3.89429	19456	0.00106525	0.00278871	79	936	2641	28	['IGLON5', 'ROBO2', 'PSG1', 'ESAM', 'NCAM2', 'OPCML', 'IGSF9', 'CADM2', 'CILP', 'BOC', 'KDR', 'CNTN6', 'NTM', 'HMCN1', 'HSPG2', 'ROBO1', 'PSG5', 'PSG2', 'IGSF10', 'FSTL5', 'CILP2', 'BSG', 'VSIG10', 'KIRREL2', 'DSCAM', 'CHL1', 'CNTN5', 'MDGA2']
Trypsin:83:s	38	24	31	23	6.5932	19456	0.0010699	0.00279932	221	210	224	19	['PRSS3', 'TMPRSS9', 'F2', 'TMPRSS11F', 'PRSS55', 'OVCH1', 'KLK10', 'CTRC', 'TMPRSS15', 'GZMA', 'PROZ', 'ACR', 'KLK14', 'F10', 'PRSS27', 'HGFAC', 'KLK8', 'CTSG', 'PRSS38']
RCC1:6:s	24	13	21	13	5.9894	19456	0.00108442	0.00282617	50	45	215	7	['ALS2', 'HERC2', 'HERC5', 'HERC6', 'HERC4', 'RCC2', 'RCC1']
Keratin_B2_2:39:s	24	13	23	13	6.13026	19456	0.00108442	0.00282617	45	53	195	13	['KRTAP10-4', 'KRTAP10-10', 'KRTAP4-6', 'KRTAP10-12', 'KRTAP10-8', 'KRTAP9-4', 'KRTAP4-1', 'KRTAP4-7', 'KRTAP10-3', 'KRTAP5-11', 'KRTAP12-3', 'KRTAP4-4', 'KRTAP9-8']
Filament:60:r	24	13	23	13	7.06517	19456	0.00108442	0.00282617	312	104	102	16	['KRT85', 'KRT1', 'NES', 'KRT82', 'KRT74', 'LMNB1', 'KRT4', 'GFAP', 'KRT15', 'KRT75', 'KRT2', 'KRT3', 'NEFM', 'KRT7', 'KRT13', 'KRT12']
BTB:80:s	24	13	20	13	5.83673	19456	0.00108442	0.00282617	111	223	239	18	['ZBTB11', 'KLHL36', 'KLHL5', 'BTBD19', 'ZBTB22', 'ZNF238', 'ZBTB33', 'RHOBTB2', 'KBTBD7', 'KLHL1', 'KLHL13', 'BCL6B', 'ZBTB48', 'KBTBD2', 'KLHL17', 'ZBTB49', 'ZBTB5', 'ABTB1']
SH3_9:49:e	24	13	14	13	4.61606	19456	0.00108442	0.00282617	49	409	557	10	['SORBS1', 'SORBS2', 'PACSIN3', 'RIMBP2', 'NCK1', 'ABI2', 'NOSTRIN', 'BAIAP2L1', 'MYO1F', 'FNBP1']
Ig_2:44:q	51	35	43	35	4.13855	19456	0.0011764	0.00305221	79	811	1648	25	['PSG6', 'GP6', 'LILRA2', 'A1BG', 'LILRA1', 'FCRL6', 'IL1RAPL2', 'FCRL1', 'IL1RL2', 'FCER1A', 'CD48', 'SIGLEC1', 'CNTN5', 'FCRL4', 'CEACAM6', 'ICAM5', 'HSPG2', 'PSG5', 'NEO1', 'FCGR2B', 'LILRB2', 'FCGR2A', 'LILRB5', 'FCRL5', 'PSG4']
7tm_4:155:i	70	52	70	52	6.45536	19456	0.00117849	0.00305421	280	469	454	50	['OR4C15', 'OR5AS1', 'OR51G2', 'OR7G2', 'OR5D18', 'OR6C68', 'OR52E6', 'OR51A4', 'OR9A2', 'OR5I1', 'OR13C5', 'OR56A4', 'OR5T3', 'OR4K17', 'OR10T2', 'OR5H2', 'OR5D14', 'OR4K15', 'OR2J3', 'OR4F6', 'OR5F1', 'OR10K1', 'OR8D4', 'OR8B8', 'OR13C2', 'OR56A3', 'OR5K3', 'OR6Y1', 'OR51I1', 'OR4D6', 'OR11A1', 'OR2T8', 'OR7A5', 'OR1D5', 'OR51E2', 'OR4B1', 'OR6C74', 'OR10J5', 'OR51D1', 'OR52I2', 'OR51A2', 'OR13…
V-set:12:e	58	41	40	39	5.87618	19456	0.00117797	0.00305421	109	958	562	28	['PSG1', 'SLAMF6', 'IGSF11', 'VSTM4', 'CD79B', 'TIMD4', 'MCAM', 'LY6G6F', 'CD276', 'HHLA2', 'BTN2A2', 'BTNL9', 'CD226', 'NCAN', 'CD86', 'BTNL2', 'Q5JXA8', 'MPZL3', 'CEACAM21', 'CLMP', 'BTNL8', 'CADM2', 'CD83', 'CD80', 'SIRPB1', 'TREM1', 'VSTM2L', 'PIGR']
Arm:22:s	33	20	25	20	6.10427	19456	0.00121236	0.00313502	41	131	273	11	['KPNA5', 'KPNA6', 'CTNND2', 'KPNA2', 'PKP1', 'KPNA3', 'SPAG6', 'ARMC3', 'KPNA4', 'CTNND1', 'ARMC4']
Pkinase_Tyr:189:v	33	20	23	20	3.89324	19456	0.00121236	0.00313502	260	1213	1264	20	['EPHA5', 'ROR1', 'KSR2', 'GUCY2F', 'MAP3K13', 'ABL1', 'PTK2B', 'DDR1', 'KIT', 'FLT4', 'JAK3', 'BLK', 'MET', 'FGFR4', 'FLT1', 'CSF1R', 'FGFR3', 'KDR', 'LIMK2', 'NTRK1']
7tm_1:94:r	93	73	84	72	5.9724	19456	0.00121697	0.00314518	268	839	843	58	['RHO', 'CXCR7', 'NPSR1', 'CCR3', 'HTR2A', 'RXFP3', 'HTR1F', 'MCHR2', 'EDNRB', 'MRGPRX1', 'SSTR1', 'APLNR', 'LHCGR', 'RXFP2', 'CNR2', 'GPR52', 'MTNR1B', 'LPAR1', 'P2RY8', 'GPR141', 'GPR65', 'MRGPRF', 'CXCR5', 'GPR15', 'CNR1', 'OXGR1', 'RXFP1', 'HTR4', 'CCR1', 'HTR2C', 'F2R', 'GPR87', 'PROKR2', 'DRD3', 'GPR174', 'P2RY2', 'CXCR1', 'PPYR1', 'GPR84', 'DRD2', 'GPR88', 'GPR75', 'HRH4', 'GPR25', 'AVPR2'…
SPRY:103:P	29	17	23	17	6.63557	19456	0.00122353	0.00315862	120	148	166	18	['RYR2', 'RYR1', 'RFPL4B', 'TRIM9', 'BTN3A3', 'TRIM58', 'RNF123', 'TRIM50', 'TRIM25', 'TRIM69', 'MID2', 'RFPL2', 'TRIM41', 'BTN3A1', 'TRIM65', 'SPSB1', 'TRIM5', 'TRIM26']
7tm_4:247:a	118	97	109	93	7.20872	19456	0.0012271	0.00316611	280	469	454	94	['OR9A4', 'OR11G2', 'OR7A10', 'OR52N2', 'OR6B1', 'OR11H12', 'OR2L1P', 'OR6M1', 'OR5B3', 'OR4E2', 'OR56B1', 'OR10G9', 'OR51S1', 'OR4C3', 'OR4X1', 'OR4K1', 'OR1E1', 'OR52A1', 'OR51L1', 'OR5D14', 'OR5H2', 'OR2J3', 'OR10G3', 'OR5B2', 'OR51I2', 'OR4K5', 'OR10A3', 'OR5B12', 'OR2J2', 'OR4A5', 'OR51F1', 'OR9Q1', 'OR6K2', 'OR5H15', 'OR4C13', 'OR4C12', 'OR5J2', 'OR13C9', 'OR2G6', 'OR1C1', 'OR5AU1', 'OR13H1…
ig:35:g	28	16	19	16	2.88718	19456	0.00123988	0.00319376	87	1005	2154	13	['FCRL3', 'LILRA2', 'FCRL4', 'AMIGO2', 'VSIG10', 'KIR3DL1', 'MCAM', 'LILRB5', 'FLT1', 'NFASC', 'CHL1', 'IL1R2', 'SIGLEC6']
ABC_tran:77:r	28	16	25	16	6.35265	19456	0.00123988	0.00319376	137	141	195	17	['ABCA3', 'ABCB4', 'ABCA7', 'ABCC10', 'ABCD3', 'ABCA4', 'ABCC2', 'ABCD2', 'ABCC1', 'ABCC8', 'ABCG2', 'ABCG8', 'ABCA1', 'ABCB9', 'ABCA8', 'TAP1', 'ABCA6']
ig:41:s	28	16	23	16	2.88718	19456	0.00123988	0.00319376	87	1005	2154	15	['SEMA3E', 'TIE1', 'CHL1', 'VCAM1', 'NFASC', 'CD33', 'FLT3', 'CD4', 'FLT1', 'KDR', 'LILRB5', 'VSTM4', 'IGSF1', 'CD79A', 'PTPRM']
RRM_1:63:k	99	79	71	77	6.05407	19456	0.00125815	0.00323902	70	540	848	37	['ELAVL1', 'NCL', 'ELAVL4', 'HNRNPCL1', 'HTATSF1', 'A1CF', 'RBM47', 'RBPMS', 'ELAVL3', 'RBPMS2', 'SYNCRIP', 'CELF6', 'TIAL1', 'RBM11', 'PABPC1', 'CCBL2', 'SPEN', 'HNRNPH2', 'PABPN1L', 'MTHFSD', 'HNRNPH1', 'SRSF9', 'RBFOX1', 'CELF1', 'CELF4', 'ELAVL2', 'PABPC5', 'RBMS3', 'FLJ20273', 'MSI1', 'RBM42', 'SRSF5', 'RAVER2', 'U2AF1L4', 'PABPC3', 'TRNAU1AP', 'CSTF2T']
V-set:11:G	45	30	35	27	5.51006	19456	0.00129972	0.00333498	109	958	562	29	['CD33', 'TREM2', 'CEACAM3', 'VSIG8', 'CEACAM8', 'CADM2', 'CD7', 'VSIG2', 'CEACAM21', 'AMICA1', 'HEPACAM', 'CTLA4', 'SIGLEC6', 'CEACAM1', 'SIGLEC10', 'PSG8', 'MXRA8', 'Q5JXA8', 'CRTAM', 'VSTM2L', 'SIRPB1', 'MOG', 'TIMD4', 'TREM1', 'PSG5', 'CEACAM6', 'CEACAM5', 'NPHS1', 'SIGLEC12']
7tm_4:220:a	82	63	82	63	6.68363	19456	0.00130344	0.00334266	280	469	454	64	['OR4K1', 'OR9I1', 'OR2J3', 'OR52H1', 'OR4D2', 'OR5I1', 'OR13C2', 'OR10K2', 'OR13G1', 'OR6C65', 'OR52L1', 'OR4D6', 'OR4N4', 'OR5AN1', 'OR9A4', 'OR6C74', 'OR6K2', 'OR4A15', 'OR9G1', 'OR2D2', 'OR4A5', 'OR2L13', 'OR2G3', 'OR4D1', 'OR51L1', 'OR8I2', 'OR52E2', 'OR9K2', 'OR4C15', 'OR2B11', 'OR51F2', 'OR4A16', 'OR2A25', 'OR51I1', 'OR2M3', 'OR6Q1', 'OR52E4', 'OR4C12', 'OR11L1', 'OR3A2', 'OR2B3', 'OR10AG1…
Pkinase:41:k	71	53	46	52	4.96587	19456	0.00130557	0.00334628	264	1221	1293	37	['LATS1', 'WNK1', 'CAMK1', 'GSK3A', 'CAMKK2', 'MAPK9', 'PAK4', 'ACVR2A', 'EIF2AK3', 'MAP4K1', 'PRKACB', 'MAPK15', 'STK38', 'TTBK1', 'RPS6KA3', 'AKT2', 'GSK3B', 'GRK6', 'PRKCI', 'NEK8', 'CDK15', 'CDK14', 'ULK2', 'CSNK2A2', 'DAPK3', 'NUAK1', 'GRK4', 'RPS6KB2', 'PRKCQ', 'CAMK1D', 'PRKG2', 'STK39', 'DCLK1', 'CAMKV', 'MAP2K1', 'MAP4K3', 'STK35']
Ig_3:20:t	120	99	89	93	4.69265	19456	0.00136055	0.0034853	79	936	2641	40	['IGSF9', 'PTPRD', 'NFASC', 'CEACAM1', 'IGSF10', 'KIRREL2', 'MAG', 'CNTN4', 'CNTN5', 'BSG', 'CNTN3', 'VSIG1', 'SIGLEC12', 'CD276', 'PRTG', 'SIGLEC8', 'DSCAM', 'IGDCC3', 'LRIG1', 'HMCN1', 'CADM2', 'ROBO2', 'NEO1', 'FCRL1', 'CEACAM5', 'ROBO1', 'L1CAM', 'MDGA2', 'CADM3', 'MUSK', 'PXDNL', 'KDR', 'LSAMP', 'CD22', 'FGFR2', 'KIRREL3', 'CEACAM6', 'NCAM2', 'CHL1', 'HEPACAM']
PH:52:n	54	38	38	38	5.87961	19456	0.00139122	0.00356188	105	511	522	27	['TIAM2', 'GRB7', 'MPRIP', 'SH2B3', 'PRKD1', 'ADRBK2', 'ACAP2', 'DOCK11', 'GRB10', 'BTK', 'ARHGEF18', 'ASAP3', 'ADAP2', 'TBC1D2', 'TRIOBP', 'PLEKHF2', 'ARAP1', 'AKT1', 'FGD4', 'RASA2', 'OSBPL9', 'ITK', 'RALGPS1', 'KALRN', 'DOCK9', 'VAV1', 'ARHGAP22']
Ank_2:54:g	98	78	68	77	5.15079	19456	0.00142754	0.00365087	84	529	1570	48	['DAPK1', 'ANKRD65', 'ANKHD1', 'ASB10', 'TNKS', 'TRPA1', 'TEX14', 'ANKRD44', 'ANK1', 'MYO16', 'TANC2', 'RAI14', 'POTEF', 'CASKIN1', 'BTBD11', 'ANKRD5', 'TANC1', 'ASB15', 'ANK2', 'ESPN', 'EHMT1', 'ANKRD42', 'ENSG00000188219', 'GABPB1', 'ANKRD32', 'MPHOSPH8', 'RNASEL', 'TNKS2', 'ASB14', 'ANKRD49', 'ANKK1', 'ANKRD45', 'TP53BP2', 'POTEH', 'ANKRD33', 'CLIP4', 'ANKRD52', 'ANKRD2', 'PPP1R16B', 'POTE2', …
Ig_2:64:s	72	54	54	53	4.63605	19456	0.00144788	0.00370086	79	811	1648	24	['IGSF1', 'GP6', 'CEACAM5', 'FCRL3', 'PSG1', 'PSG9', 'CD22', 'HSPG2', 'PSG4', 'PSG8', 'PSG2', 'PSG6', 'FCRL1', 'CD86', 'FCRL5', 'FCER1A', 'PSG5', 'LILRA4', 'SEMA7A', 'PSG3', 'FCRLB', 'LILRA5', 'LILRB2', 'CNTN5']
LRR_8:28:k	147	125	122	117	6.32993	19456	0.00145215	0.00370972	61	364	1040	61	['LRRTM3', 'LRRC8A', 'SLIT1', 'LINGO1', 'RTN4RL1', 'LRRN1', 'PODNL1', 'LINGO2', 'LRCH3', 'RXFP2', 'NTRK3', 'LRRC32', 'TLR9', 'SLIT3', 'LRRC7', 'LGR6', 'LRRTM1', 'LRRC33', 'LRCH1', 'SLITRK6', 'IGSF10', 'TLR7', 'SLITRK1', 'ISLR', 'DCN', 'LRRC18', 'SCRIB', 'LRCH4', 'LRRC59', 'LRRC4C', 'LRG1', 'MFHAS1', 'LRRN2', 'FLRT2', 'LRRC58', 'LRRC8D', 'LRRIQ4', 'LRIT2', 'RTN4R', 'LRRC8C', 'LRFN1', 'LGI3', 'TLR8…
Pkinase:96:s	86	67	64	67	5.24239	19456	0.00146327	0.00373403	264	1221	1293	46	['MAP2K1', 'PRKCB', 'MAP3K9', 'TRIB1', 'BUB1B', 'CDC42BPG', 'RPS6KA2', 'PRKACG', 'MKNK2', 'TLK2', 'STK10', 'PRKG1', 'NEK4', 'MAP4K3', 'PRKD2', 'CAMKK2', 'NEK7', 'OXSR1', 'CDC7', 'CLK2', 'CAMKV', 'PRKCI', 'PRKD1', 'DYRK1A', 'CDK16', 'CDK6', 'CAMK1', 'PAK2', 'PRKCQ', 'GAK', 'CIT', 'CLK1', 'IRAK2', 'HIPK2', 'RPS6KA3', 'MAP2K4', 'AAK1', 'ERN2', 'TTBK2', 'MST4', 'DCLK1', 'PIM1', 'DYRK1B', 'RPS6KA1', '…
Ion_trans:145:a	64	47	50	47	5.57709	19456	0.00146772	0.00374129	245	359	763	29	['ITPR1', 'SCN2A', 'CATSPER3', 'TRPC3', 'CATSPER4', 'KCNG1', 'SCN4A', 'KCNQ5', 'KCNS2', 'KCNH6', 'TRPV1', 'TRPM1', 'CACNA1B', 'KCNQ2', 'CACNA1S', 'CACNA1E', 'SCN5A', 'KCNC3', 'CATSPER1', 'TRPC4', 'KCND2', 'SCN10A', 'KCNA5', 'ENSG00000254809', 'KCNB2', 'SCN7A', 'KCNV1', 'SCN11A', 'NALCN']
Collagen:57:p	64	47	52	47	5.38942	19456	0.00146772	0.00374129	60	175	869	26	['COL3A1', 'COLEC12', 'COL4A5', 'COL25A1', 'COL4A4', 'FCN1', 'COL1A2', 'COL13A1', 'COL7A1', 'COL5A2', 'COL2A1', 'COL20A1', 'COL9A1', 'C1QTNF6', 'COL4A2', 'COL1A1', 'COL24A1', 'C1QTNF9', 'COL4A6', 'COL22A1', 'COL16A1', 'COL18A1', 'COL5A1', 'COL6A1', 'COL9A3', 'COL6A2']
Cadherin_2:47:e	41	27	28	27	7.5215	19456	0.0014776	0.00376234	83	178	127	15	['PCDHB14', 'PCDHA6', 'PCDHA1', 'PCDHA7', 'PCDHGA6', 'PCDH11Y', 'PCDHGA3', 'PCDH11X', 'PCDHA10', 'PCDH1', 'PCDHGA7', 'PCDHAC2', 'PCDHGB3', 'PCDHGA8', 'PCDHGC5']
SH2:50:k	41	27	33	27	6.60329	19456	0.0014776	0.00376234	77	215	240	16	['SOCS5', 'SYK', 'SOCS1', 'ZAP70', 'VAV2', 'SH2D1A', 'SOCS3', 'SHC4', 'STAT3', 'PLCG1', 'SH2D1B', 'STAT5B', 'SOCS2', 'SH2B1', 'PIK3R3', 'INPPL1']
7tm_1:145:i	77	59	71	58	5.70003	19456	0.00148162	0.0037705	268	839	843	50	['FFAR3', 'GPR183', 'C3AR1', 'HTR1F', 'ADRB2', 'HRH2', 'GPR50', 'GPR21', 'CXCR3', 'GPR12', 'BRS3', 'CCRL1', 'HTR1B', 'MC5R', 'ADRA2A', 'AGTR1', 'P2RY2', 'HTR7', 'GPR101', 'MC4R', 'GPR15', 'FFAR2', 'AVPR1A', 'CXCR7', 'GPR61', 'NPBWR2', 'CXCR6', 'GPR84', 'BDKRB2', 'DRD2', 'CXCR1', 'LHCGR', 'GPR34', 'NPBWR1', 'NPY1R', 'TAAR8', 'FPR1', 'NPY2R', 'CCKBR', 'ADRA2C', 'GPR119', 'CCBP2', 'CXCR5', 'TAAR1', …
I-set:2:k	102	82	77	78	3.93327	19456	0.00153112	0.00388625	90	839	3800	22	['NTRK3', 'PXDNL', 'ROBO1', 'PXDN', 'TTN', 'MYPN', 'MYBPC2', 'ROBO2', 'IGSF22', 'OBSCN', 'LRFN5', 'HSPG2', 'OBSL1', 'SDK2', 'LRRC4B', 'CNTN3', 'SPEG', 'NTM', 'ROBO3', 'LRIG1', 'PRTG', 'KIRREL']
SPRY:67:d	25	14	22	14	6.42145	19456	0.001548	0.00391801	120	148	166	15	['BTNL9', 'TRIM58', 'SPSB4', 'RYR1', 'TRIM69', 'HNRPU', 'HNRNPU', 'TRIM68', 'RYR2', 'RFPL4B', 'TRIM10', 'BTN1A1', 'RNF123', 'TRIM11', 'TRIM27']
Hemopexin:44:p	25	14	25	14	7.09605	19456	0.001548	0.00391801	45	33	104	10	['MMP3', 'MMP1', 'MMP14', 'MMP2', 'VTN', 'MMP13', 'MMP16', 'MMP8', 'MMP10', 'MMP17']
DEAD:132:r	25	14	23	14	6.77412	19456	0.001548	0.00391801	176	128	130	15	['DDX4', 'DDX27', 'DDX42', 'DDX41', 'DDX18', 'TDRD9', 'DHX38', 'DDX54', 'DDX56', 'DHX37', 'DDX3X', 'DDX55', 'DDX23', 'HELQ', 'DDX17']
hEGF:9:d	57	41	37	40	5.63017	19456	0.00160195	0.00404839	22	104	655	12	['CRB1', 'FBN2', 'NOTCH1', 'MEGF10', 'SLIT2', 'NOTCH2', 'DNER', 'NOTCH3', 'CRB2', 'DLL1', 'JAG1', 'NOTCH4']
SH2:29:S	30	18	22	18	6.15263	19456	0.00160212	0.00404839	77	215	240	16	['SHB', 'INPP5D', 'PIK3R1', 'SYK', 'MATK', 'SOCS3', 'LCP2', 'VAV2', 'SOCS1', 'PIK3R3', 'PIK3R2', 'BMX', 'PLCG1', 'RASA1', 'ZAP70', 'BLK']
zf-C4:29:R	30	18	25	18	6.81159	19456	0.00160212	0.00404839	70	152	152	13	['RARG', 'NR1D1', 'HNF4G', 'THRA', 'RARA', 'NR2F2', 'NR2E1', 'ESRRG', 'NR4A2', 'PPARD', 'RORC', 'NR6A1', 'NR1H3']
PH:13:g	48	33	38	33	5.70969	19456	0.00160701	0.00405634	105	511	522	28	['APBB1IP', 'ARHGEF4', 'STAP1', 'BTK', 'CNKSR2', 'SH3BP2', 'ARHGAP15', 'Q96M56', 'GAB4', 'PLEKHS1', 'ABR', 'PHLDB2', 'PREX2', 'ASAP2', 'OPHN1', 'C10orf81', 'MYO10', 'ADAP2', 'SNTB1', 'SKAP1', 'Q96HZ0', 'VEPH1', 'CYTH3', 'PRKD1', 'PLEKHB2', 'ARHGAP25', 'CYTH2', 'CYTH4']
SH2:18:e	40	26	27	26	6.56767	19456	0.00166983	0.0042096	77	215	240	22	['SHC2', 'ZAP70', 'MATK', 'HCK', 'BTK', 'SYK', 'PLCG1', 'FYN', 'GRB14', 'LYN', 'FER', 'BCAR3', 'STAT1', 'BMX', 'SH2D2A', 'FGR', 'TNS1', 'TXK', 'CLNK', 'FES', 'STAP1', 'SH2D1A']
hEGF:13:g	50	35	34	35	5.44113	19456	0.00167453	0.0042176	22	104	655	18	['FBN2', 'SNED1', 'NOTCH4', 'DNER', 'SLIT1', 'NOTCH3', 'NOTCH2', 'NOTCH1', 'JAG1', 'FBN3', 'CELSR2', 'CRB1', 'CRB2', 'SLIT2', 'DLL1', 'WIF1', 'MEGF10', 'MEGF6']
Pkinase_Tyr:228:p	36	23	26	23	4.01877	19456	0.00180658	0.00453096	260	1213	1264	20	['TEX14', 'FLT4', 'ANKK1', 'TGFBR2', 'TIE1', 'DSTYK', 'EPHA4', 'JAK3', 'EPHA3', 'NPR2', 'ERBB4', 'NPR1', 'JAK1', 'EPHA7', 'FGFR3', 'EPHA8', 'MAP3K10', 'FES', 'NRBP1', 'TEK']
7tm_1:70:a	60	44	47	43	5.34013	19456	0.00180673	0.00453096	268	839	843	36	['NTSR1', 'P2RY14', 'DRD2', 'PTGDR', 'ADRA1A', 'MRGPRX2', 'GPBAR1', 'TACR3', 'OPRL1', 'CX3CR1', 'OPRK1', 'NPSR1', 'AVPR1A', 'BRS3', 'CCR9', 'C5AR1', 'ADORA3', 'GPR85', 'F2R', 'GPR139', 'LTB4R', 'RRH', 'HTR5A', 'MCHR2', 'CXCR7', 'P2RY8', 'NPY2R', 'LPAR4', 'S1PR3', 'PROKR2', 'ADRA1B', 'NMUR2', 'MTNR1B', 'NMBR', 'MAS1', 'NPY1R']
WD40:31:D	155	134	114	129	5.8242	19456	0.00181676	0.00455365	38	506	1557	70	['FBXW7', 'ATG16L1', 'PEX7', 'WDR25', 'STRAP', 'WDR33', 'HIRA', 'BRWD1', 'EIF3I', 'WDR5B', 'DCAF8L1', 'TBL1XR1', 'TAF5L', 'GNB1', 'WDSUB1', 'EML4', 'WDR83', 'RFWD2', 'TSSC1', 'RRP9', 'STXBP5L', 'SPAG16', 'UTP15', 'PIK3R4', 'BRWD3', 'WDR3', 'RBBP7', 'KIF21B', 'STRN3', 'WDR37', 'RBBP4', 'NWD1', 'KATNB1', 'GNB2', 'EML2', 'WDR7', 'SNRNP40', 'WDR26', 'CDC20', 'WDR1', 'WDR69', 'FZR1', 'GNB5', 'BTRC', '…
Neur_chan_LBD:179:g	21	11	19	11	7.03715	19456	0.0018818	0.0046914	216	88	91	13	['GABRB1', 'GLRA2', 'GABRR2', 'GLRA3', 'CHRNA1', 'CHRND', 'CHRNA2', 'GABRA2', 'GABRA6', 'CHRNB3', 'GABRA1', 'GABRP', 'HTR3A']
SAM_1:55:k	21	11	15	11	5.77016	19456	0.0018818	0.0046914	64	185	219	10	['L3MBTL3', 'KAZN', 'ANKS1B', 'CNKSR1', 'SCMH1', 'EPHA1', 'EPHA2', 'SFMBT2', 'PPFIA2', 'EPHA5']
SPRY:19:G	21	11	19	11	6.16991	19456	0.0018818	0.0046914	120	148	166	16	['TRIML2', 'ASH2L', 'RYR2', 'TRIM68', 'HNRNPU', 'TRIM58', 'TRIM6', 'TRIM9', 'RFPL4B', 'BTNL3', 'TRIM41', 'BTN1A1', 'FSD1', 'TRIM49', 'HNRPU', 'TRIML1']
Ion_trans_2:28:a	21	11	15	11	6.26882	19456	0.0018818	0.0046914	79	131	155	7	['KCNT2', 'KCNK9', 'KCNK10', 'KCNK18', 'KCNK1', 'KCNK13', 'KCNK6']
Ank_2:83:k	49	34	39	33	4.15079	19456	0.00188046	0.0046914	84	529	1570	24	['DAPK1', 'ENSG00000174501', 'ASB10', 'KANK1', 'ACBD6', 'ANKFY1', 'ANKRD1', 'ANKRD20A2', 'IBTK', 'ESPN', 'NFKB1', 'TNKS', 'POTEH', 'PSMD10', 'ESPNL', 'TNKS2', 'FEM1B', 'ANKRD23', 'POTEC', 'INVS', 'NFKBID', 'OSTF1', 'ANKRD18B', 'ANKS6']
BTB_2:9:r	21	11	17	11	7.33549	19456	0.0018818	0.0046914	94	74	74	13	['KCND1', 'KCNS3', 'KCND3', 'KCNA1', 'KCNG4', 'KCNC1', 'KCNC2', 'KCNC3', 'KCND2', 'KCNRG', 'KCNA3', 'KCTD2', 'KCNC4']
PDEase_I:126:k	21	11	5	11	7.06921	19456	0.0018818	0.0046914	238	89	89	4	['PDE4D', 'PDE5A', 'PDE4B', 'PDE1A']
PHD:8:k	21	11	15	11	5.94503	19456	0.0018818	0.0046914	52	167	194	12	['TRIM24', 'PYGO1', 'TIF1', 'CHD5', 'PHF21A', 'KMT2D', 'MLL3', 'INTS12', 'PHF3', 'DPF2', 'SP140L', 'BAZ2A']
Keratin_B2_2:27:C	21	11	20	11	5.93762	19456	0.0018818	0.0046914	45	53	195	13	['KRTAP4-6', 'KRTAP9-2', 'KRTAP4-5', 'KRTAP4-3', 'KRTAP9-3', 'KRTAP10-10', 'KRTAP4-4', 'KRTAP10-1', 'KRTAP4-1', 'KRTAP4-12', 'KRTAP10-2', 'KRTAP5-5', 'KRTAP10-6']
p450:330:E	21	11	21	11	6.73759	19456	0.0018818	0.0046914	463	102	112	16	['CYP2C19', 'CYP2W1', 'CYP4B1', 'CYP2C9', 'CYP26B1', 'CYP26A1', 'CYP2C8', 'CYP4A22', 'CYP27C1', 'CYP4X1', 'CYP2A6', 'CYP3A5', 'CYP11B1', 'CYP4Z1', 'CYP2C18', 'CYP11A1']
7tm_1:132:k	71	54	60	52	5.58299	19456	0.00189189	0.00471402	268	839	843	49	['GPR176', 'GPR39', 'O3FAR1', 'MCHR1', 'EDNRB', 'F2RL3', 'CCR6', 'GHSR', 'DRD2', 'GPR55', 'TACR3', 'RGR', 'GPR6', 'XCR1', 'PROKR1', 'GPR17', 'HTR2A', 'EDNRA', 'GPR1', 'GPR78', 'ADRA1D', 'NPBWR1', 'CXCR1', 'APLNR', 'HCRTR2', 'GPR148', 'CX3CR1', 'LPAR1', 'BDKRB1', 'MRGPRX3', 'CNR2', 'OXER1', 'BRS3', 'SSTR4', 'GPR132', 'GPR61', 'GPR162', 'AVPR2', 'CHRM2', 'LHCGR', 'HTR1F', 'MRGPRF', 'GPR18', 'GPR87'…
RRM_1:24:p	80	62	69	61	5.74664	19456	0.00189893	0.00472904	70	540	848	35	['PABPC1', 'RBM4', 'RAVER2', 'CELF3', 'PABPN1L', 'HNRNPH1', 'CELF6', 'RBM19', 'ELAVL3', 'ELAVL2', 'RBM4B', 'ELAVL1', 'HNRPD', 'RBM15', 'A1CF', 'DAZAP1', 'HNRNPD', 'RBMX', 'RBMXL2', 'PSPC1', 'RNPC3', 'HNRNPA1L2', 'SCAF4', 'RBM12B', 'CELF5', 'RBM14', 'NCL', 'SRSF9', 'CCBL2', 'RBM42', 'TIAL1', 'RBM7', 'SRSF6', 'PABPC3', 'SFPQ']
VWA:75:g	22	12	18	12	5.65786	19456	0.00192686	0.00477303	175	144	248	12	['COL6A3', 'ITGA1', 'COCH', 'COL7A1', 'COL12A1', 'COL21A1', 'COL6A6', 'COL14A1', 'ITGAE', 'ITIH2', 'VIT', 'COL6A2']
Calx-beta:96:f	22	12	21	12	6.72942	19456	0.00192686	0.00477303	100	26	118	3	['GPR98', 'SLC8A1', 'SLC8A3']
Filament:294:a	22	12	22	12	6.93964	19456	0.00192686	0.00477303	312	104	102	15	['KRT32', 'KRT40', 'KRT4', 'KRT20', 'VIM', 'NEFM', 'KRT39', 'KRT17', 'KRT3', 'KRT33A', 'KRT16', 'KRT35', 'KRT72', 'KRT24', 'KRT33B']
MFS_1:185:k	22	12	19	12	5.64628	19456	0.00192686	0.00477303	353	229	250	8	['MFSD1', 'SLC16A9', 'SLC17A3', 'FLVCR2', 'SLC18A3', 'SLC22A3', 'SLC22A18', 'SPNS1']
C1q:91:v	22	12	22	12	8.12021	19456	0.00192686	0.00477303	127	44	45	8	['C1QTNF3', 'CBLN2', 'C1QTNF5', 'COL8A2', 'C1QTNF4', 'EMILIN2', 'C1QC', 'OTOL1']
ABC_membrane:135:v	22	12	12	12	6.85717	19456	0.00192686	0.00477303	274	68	108	7	['ABCB8', 'ABCB4', 'ABCC3', 'ABCC9', 'ABCC8', 'ABCC10', 'ABCC11']
PH:61:t	22	12	17	12	4.58415	19456	0.00192686	0.00477303	105	511	522	12	['ARHGAP25', 'SKAP1', 'ARAP3', 'PLD1', 'RTKN', 'PLEKHA4', 'ARHGEF9', 'VEPH1', 'GAB3', 'VAV3', 'SH2B3', 'SNTA1']
ig:27:t	22	12	18	12	2.53926	19456	0.00192686	0.00477303	87	1005	2154	15	['FCRL3', 'NFASC', 'IGLON5', 'VCAM1', 'TIE1', 'KDR', 'IL1RAPL2', 'LILRA4', 'KIR3DL1', 'CD200', 'MYOM3', 'SEMA3E', 'KIR2DL4', 'PTPRM', 'CHL1']
AMP-binding:415:R	22	12	18	12	7.29013	19456	0.00192686	0.00477303	423	73	80	11	['ACSL6', 'ACSS1', 'ACSF3', 'ACSM2A', 'ACSS3', 'ACSL3', 'SLC27A6', 'SLC27A3', 'AASDH', 'SLC27A5', 'SLC27A2']
Lectin_C:62:k	38	25	33	23	6.62577	19456	0.00204025	0.00503247	108	165	219	15	['NCAN', 'MRC2', 'PLA2R1', 'COLEC11', 'CLEC10A', 'CD69', 'LY75', 'PRG2', 'CLEC6A', 'CLEC1A', 'CLEC4C', 'CD93', 'CLEC2L', 'SFTPD', 'CLEC3A']
Collagen:3:p	72	55	60	54	5.55934	19456	0.00206318	0.00508096	60	175	869	25	['MSR1', 'COL4A6', 'COL27A1', 'COLEC12', 'COL4A3', 'COL7A1', 'COL4A5', 'COL23A1', 'COL6A2', 'COL11A1', 'COL4A1', 'C1QTNF7', 'CCBE1', 'COL4A4', 'COL12A1', 'COL1A2', 'COL3A1', 'COL6A1', 'COL25A1', 'COL14A1', 'COLEC11', 'COL5A2', 'COL21A1', 'COL22A1', 'COL2A1']
PH:40:k	31	19	24	19	5.07892	19456	0.00210634	0.00518448	105	511	522	19	['ARHGEF9', 'COL4A3BP', 'ARHGEF7', 'ARHGEF4', 'DOCK11', 'KALRN', 'VAV3', 'CIT', 'PREX2', 'AKT1', 'ARHGAP10', 'TRIO', 'GRB7', 'FGD5', 'PLEKHF1', 'Q96M56', 'PLEKHO1', 'ARHGEF6', 'ARHGEF16']
Pkinase:167:E	84	66	60	63	5.20844	19456	0.00210745	0.00518448	264	1221	1293	47	['PAK7', 'RPS6KA2', 'PKN2', 'TAOK3', 'MAP2K7', 'CDKL4', 'PLK1', 'MINK1', 'BMPR2', 'CAMK4', 'BRSK1', 'PHKG2', 'MAPK13', 'CHEK2', 'MAP3K9', 'SCYL3', 'CAMKK2', 'MAP4K1', 'PAK1', 'NUAK2', 'CDKL1', 'PRKD2', 'DCLK3', 'WEE2', 'MAP2K4', 'PRKACG', 'MAP2K2', 'CHUK', 'DYRK3', 'PRKD3', 'LATS1', 'PRKCZ', 'PRKCI', 'ULK1', 'PRKCB', 'RIPK3', 'TBCK', 'PRKD1', 'MAK', 'MYLK2', 'MAPKAPK3', 'BRSK2', 'TRIB1', 'MAPK4',…
Helicase_C:18:k	27	16	22	16	6.27816	19456	0.00212798	0.00521843	111	196	198	9	['DDX4', 'DDX21', 'DHX36', 'CHD4', 'ERCC6', 'SMARCA5', 'CHD5', 'FANCM', 'SMARCA4']
RCC1:31:g	27	16	15	16	6.15932	19456	0.00212798	0.00521843	50	45	215	10	['RPGR', 'RCC1', 'HERC5', 'HERC1', 'HERC6', 'HERC2', 'NEK9', 'HERC4', 'RCBTB2', 'NEK8']
Laminin_G_2:47:g	27	16	17	16	5.87409	19456	0.00212798	0.00521843	126	111	262	10	['CELSR1', 'NELL2', 'COL11A1', 'NRXN1', 'PROS1', 'CNTNAP1', 'CNTNAP4', 'NRXN2', 'CELSR3', 'CRB1']
Trypsin:209:g	27	16	26	16	6.10016	19456	0.00212798	0.00521843	221	210	224	17	['PRSS45', 'TPSG1', 'F9', 'ACR', 'PRSS53', 'TMPRSS9', 'PRSS22', 'PRSS37', 'MASP2', 'PRSS50', 'KLK8', 'GZMB', 'F10', 'PRSS55', 'HPN', 'MASP1', 'PROC']
Pkinase_Tyr:86:G	43	29	30	28	4.27511	19456	0.00212469	0.00521843	260	1213	1264	20	['TNK2', 'NTRK3', 'TEX14', 'ACVRL1', 'ABL2', 'MUSK', 'FGFR2', 'MLKL', 'LIMK2', 'MAP3K13', 'GUCY2F', 'HCK', 'PDGFRB', 'TIE1', 'FLT1', 'AXL', 'ABL1', 'SRMS', 'EPHA7', 'MST1R']
RhoGEF:114:k	27	16	19	16	6.22804	19456	0.00212798	0.00521843	181	200	205	12	['PLEKHG4B', 'VAV2', 'NGEF', 'PLEKHG6', 'MCF2', 'RASGRF2', 'ECT2', 'SOS2', 'ARHGEF16', 'PREX2', 'MCF2L', 'ECT2L']
I-set:19:e	186	165	148	150	4.8	19456	0.00219921	0.00539027	90	839	3800	45	['TTN', 'IGSF9', 'PTPRD', 'OBSCN', 'NFASC', 'IGSF10', 'KIRREL2', 'CNTN4', 'CNTN5', 'LRIT1', 'MYBPC2', 'IGSF5', 'PRTG', 'IGFBP7', 'MYOM1', 'DSCAM', 'IGDCC3', 'CD101', 'LRIG1', 'HMCN1', 'ROBO2', 'PAPLN', 'NRG1', 'NEO1', 'ROBO1', 'L1CAM', 'MDGA2', 'CADM3', 'MUSK', 'PXDNL', 'KDR', 'SIGLEC6', 'LSAMP', 'HSPG2', 'MYPN', 'LRRC4', 'FGFR2', 'KIRREL3', 'LRRC4B', 'OBSL1', 'NCAM2', 'DCC', 'PXDN', 'CHL1', 'CNT…
Ras:70:r	54	39	50	39	6.76797	19456	0.00220641	0.00539937	162	274	282	29	['RAB5C', 'RAB22A', 'MRAS', 'RAB7L1', 'RAB27B', 'RAB3C', 'RRAS', 'RAB15', 'RAB1B', 'RASL11B', 'RHOB', 'RAB32', 'RHOA', 'RAB17', 'RALB', 'RAB3B', 'RAB6C', 'RALA', 'KRAS', 'NKIRAS1', 'RAB11B', 'RAB23', 'RERG', 'RAB37', 'RAB43', 'RAB6A', 'DIRAS2', 'RAB38', 'REM1']
Ldl_recept_a:17:p	54	39	49	39	6.66911	19456	0.00220641	0.00539937	37	82	302	15	['LRP8', 'CFI', 'TMPRSS7', 'LRP2', 'HSPG2', 'LRP1', 'SORL1', 'LRP1B', 'CD320', 'VLDLR', 'LDLR', 'LDLRAD3', 'LDLRAD2', 'LRP12', 'LRP4']
C2:71:d	54	39	43	38	5.60146	19456	0.00220641	0.00539937	103	325	633	22	['SYT12', 'MYOF', 'MCTP2', 'DOC2A', 'SYT10', 'MCTP1', 'RIMS1', 'BAIAP3', 'SYT9', 'PLCG1', 'DYSF', 'ESYT2', 'PLCD1', 'PLCH1', 'PLCZ1', 'SYT1', 'PRKCG', 'SYT11', 'SYT16', 'PRKCE', 'PLCB4', 'SYT13']
EGF:19:g	62	46	48	46	5.99048	19456	0.00222586	0.00544412	32	245	555	24	['SNED1', 'NOTCH2NL', 'DNER', 'FAT2', 'CRB1', 'SLIT1', 'NOTCH3', 'NOTCH2', 'NOTCH1', 'JAG1', 'MFGE8', 'PROS1', 'PROZ', 'NOTCH4', 'VWA2', 'DLL4', 'CUBN', 'CRB2', 'SLIT2', 'DLL1', 'HABP2', 'SLIT3', 'LTBP2', 'MMRN1']
Lectin_C:79:n	26	15	26	15	6.07828	19456	0.00223126	0.00545445	108	165	219	13	['CD69', 'KLRK1', 'LY75', 'COLEC12', 'PRG2', 'CLEC1A', 'MRC2', 'PLA2R1', 'KLRG2', 'CLEC1B', 'CLEC4G', 'CLEC4D', 'CLEC3A']
Cadherin:12:g	205	184	161	170	6.41954	19456	0.00223436	0.00545817	93	227	1363	70	['PCDHGA12', 'PCDHA9', 'PCDH19', 'PCDHGB7', 'PCDH10', 'PCDH9', 'PCDHGB2', 'CDH8', 'PCDHGB1', 'PCDHGB6', 'FAT', 'CDH10', 'PCDHGA1', 'CDHR1', 'PCDHG', 'PCDHB1', 'PCDHGA6', 'PCDHB3', 'CDH22', 'PCDHGB3', 'PCDHB12', 'CDH24', 'PCDHGA7', 'PCDHB13', 'FAT3', 'PCDHA1', 'PCDHA10', 'DSC2', 'PCDHA2', 'FAT4', 'PCDHA4', 'PCDHB8', 'CDH7', 'PCDHGA11', 'CDH12', 'DSG2', 'PCDHA12', 'PCDHB5', 'PCDHB2', 'PCDHB7', 'CDH…
Pkinase_Tyr:240:k	37	24	22	24	4.0583	19456	0.00224656	0.00548034	260	1213	1264	13	['FGFR2', 'NTRK1', 'IGF1R', 'YES1', 'FGFR1', 'INSR', 'MUSK', 'ACVR1C', 'LIMK1', 'RIPK2', 'FLT3', 'JAK1', 'FGFR4']
Laminin_G_2:14:g	37	24	25	24	6.32866	19456	0.00224656	0.00548034	126	111	262	14	['CNTNAP2', 'EGFLAM', 'NRXN1', 'CELSR2', 'NRXN2', 'GAS6', 'CNTNAP3', 'SLIT3', 'CNTNAP4', 'CELSR1', 'FAT', 'CNTNAP1', 'CNTNAP5', 'NRXN3']
EGF_CA:24:s	85	67	64	67	5.79549	19456	0.00227599	0.00554632	42	189	871	28	['FBN2', 'NOTCH2NL', 'MEGF6', 'EGFL6', 'FBLN5', 'FBN1', 'FBN3', 'CD93', 'BMP1', 'LTBP4', 'NELL2', 'UMODL1', 'NOTCH1', 'LTBP2', 'THBS3', 'LTBP1', 'EMR2', 'TLL1', 'EFEMP2', 'MATN2', 'NOTCH4', 'EMR1', 'LRP2', 'JAG1', 'LRP1B', 'EGF', 'HMCN1', 'THBS4']
Pkinase:47:r	91	73	67	70	5.32392	19456	0.00232756	0.00565421	264	1221	1293	49	['NUAK2', 'MAPK9', 'PRKACB', 'MARK4', 'STK32B', 'MAPK3', 'EIF2AK1', 'AURKC', 'DAPK3', 'BRSK2', 'TAOK2', 'MAK', 'PRKAA2', 'STK32C', 'PRKD3', 'NUAK1', 'CDK18', 'SBK1', 'MARK2', 'AKT3', 'EIF2AK2', 'STK36', 'ACVR1', 'STK25', 'DYRK1B', 'STK10', 'TTN', 'STK33', 'ACVR2B', 'ENSG00000168038', 'PKMYT1', 'MARK1', 'NEK1', 'CASK', 'TSSK3', 'MAP2K4', 'PDIK1L', 'PKN3', 'MAPK4', 'MGC42105', 'HUNK', 'CDK5', 'MAP3…
PH:16:k	39	26	30	26	5.41013	19456	0.00243124	0.00589991	105	511	522	21	['SBF2', 'PLEK', 'AKT3', 'FGD2', 'CYTH4', 'OSBPL5', 'ITK', 'DOCK10', 'ADAP2', 'PLEKHH1', 'RASGRF1', 'MCF2', 'RASGRF2', 'AFAP1L2', 'PLEKHA8', 'RASA2', 'SBF1', 'CIT', 'ARHGAP10', 'ARHGAP12', 'SH3BP2']
EF-hand_7:59:G	33	21	27	21	6.41566	19456	0.00245929	0.00596487	71	289	220	22	['SPTAN1', 'KCNIP1', 'EFCAB7', 'CETN3', 'CALM3', 'PVALB', 'GUCA1A', 'CETN1', 'CALB2', 'HPCAL4', 'SCGN', 'PLS1', 'HPCAL1', 'DGKB', 'LCP1', 'CABP4', 'FKBP7', 'CAPSL', 'EFCAB1', 'CETN2', 'PPP3R2', 'PPP3R1']
TSP_1:30:g	55	40	50	40	6.17244	19456	0.00247247	0.00599372	49	105	434	20	['ADAMTS15', 'ADAMTSL4', 'ADAMTS20', 'CFP', 'THSD7A', 'HMCN1', 'ADAMTSL3', 'THSD7B', 'ADAMTS3', 'PAPLN', 'SEMA5A', 'C6', 'C8A', 'SEMA5B', 'ADAMTS4', 'BAI3', 'ADAMTS7', 'ADAMTS13', 'UNC5C', 'UNC5B']
C2:59:e	63	47	45	46	5.82385	19456	0.00247416	0.00599469	103	325	633	22	['RIMS4', 'CC2D1A', 'PRKCB', 'RIMS2', 'UNC13A', 'SYT9', 'UNC13C', 'UNC13B', 'PRKCE', 'CPNE4', 'OTOF', 'ESYT3', 'SYT10', 'RIMS1', 'RPH3A', 'SYTL3', 'SYTL4', 'SYT7', 'NEDD4', 'MCTP2', 'RASA3', 'ESYT1']
Ras:56:A	53	38	41	37	6.741	19456	0.00249504	0.00604213	162	274	282	24	['RAB37', 'RHOA', 'HRAS', 'RAP1A', 'ERAS', 'RAB7A', 'RAB8B', 'RRAS2', 'RAB40AL', 'KRAS', 'RAB6A', 'RAP2A', 'RASD2', 'EFCAB4B', 'RABL2A', 'RAB40A', 'DIRAS2', 'RAB34', 'RAB24', 'NRAS', 'RERG', 'RAB39B', 'RAC2', 'RHOD']
LIM:31:d	46	32	34	32	6.00377	19456	0.00256944	0.00621582	58	181	408	18	['FHL1', 'ABLIM1', 'FBLIM1', 'LMO2', 'ABLIM2', 'LMX1B', 'ABLIM3', 'FHL5', 'LHX6', 'LMO4', 'LHX8', 'TES', 'LIMS2', 'LHX5', 'CRIP2', 'MICALL1', 'TRIP6', 'LIMK1']
I-set:30:p	168	148	128	143	4.65316	19456	0.00259164	0.00626628	90	839	3800	52	['TTN', 'CNTN2', 'CDON', 'DSCAML1', 'ROBO3', 'MUSK', 'FGFR3', 'IGSF9', 'NFASC', 'OBSCN', 'MYBPC1', 'MYBPC3', 'IGDCC4', 'KIRREL3', 'ROBO2', 'VCAM1', 'ISLR', 'NCAM2', 'CNTN1', 'PTPRD', 'CNTN4', 'IGSF10', 'PXDNL', 'HMCN1', 'IL1RAPL1', 'HSPG2', 'KIRREL', 'LRFN5', 'KDR', 'CNTN5', 'FLT4', 'MYBPC2', 'MYOM3', 'CNTN6', 'IGDCC3', 'LRIG1', 'IGFN1', 'NEO1', 'LRIG3', 'MYBPHL', 'FGFR4', 'MDGA2', 'SIGLEC1', 'OB…
RRM_1:23:G	66	50	53	50	5.4691	19456	0.00263786	0.0063648	70	540	848	33	['IGF2BP3', 'RBM10', 'RBM19', 'ENOX1', 'LARP7', 'CIRBP', 'SNRPA', 'IGF2BP1', 'SF3B4', 'HNRNPM', 'CELF3', 'PABPC4', 'FLJ20273', 'CELF6', 'HNRPR', 'SRSF6', 'RBM42', 'RNPS1', 'RBM41', 'MSI1', 'RALYL', 'PABPC1', 'RBMS3', 'RBMXL2', 'ZNF638', 'RBM14', 'ELAVL4', 'HNRNPA0', 'ELAVL1', 'RNPC3', 'POLDIP3', 'RBM47', 'ELAVL2']
zf-C2H2:11:k	291	272	246	255	5.64271	19456	0.00267712	0.00645617	23	1207	3315	142	['ZNF25', 'ZNF419', 'ZNF737', 'ZKSCAN1', 'ZNF561', 'ZNF45', 'ZNF564', 'ZNF135', 'ZNF621', 'PRDM16', 'ZNF449', 'ZNF83', 'ZNF154', 'ZNF454', 'ZNF669', 'ZNF274', 'ZNF181', 'ZNF783', 'ZNF628', 'ZNF233', 'ZNF574', 'ZNF254', 'ZNF493', 'ZNF528', 'ZSCAN16', 'ZFP1', 'ZNF624', 'ZNF93', 'ZFP2', 'ZNF121', 'ZNF132', 'ZFP37', 'ZNF879', 'ZNF774', 'ZNF814', 'PRDM9', 'ZNF805', 'ZNF157', 'ZNF665', 'ZNF43', 'ZNF677…
BTB:105:e	32	20	27	20	6.25176	19456	0.0027631	0.00665318	111	223	239	24	['HIC2', 'PATZ1', 'ZBTB3', 'ZBTB20', 'BTBD1', 'BTBD6', 'GMCL1', 'ZBTB46', 'ANKFY1', 'KLHL34', 'KLHL7', 'ZBTB5', 'KLHL10', 'KLHL30', 'ZBTB6', 'ZBTB7A', 'CCIN', 'ENC1', 'IVNS1ABP', 'GZF1', 'KLHL23', 'ZBTB43', 'BCL6', 'ZNF278']
cNMP_binding:78:r	23	13	21	13	7.04683	19456	0.00278819	0.00669627	88	71	99	10	['PRKAR1A', 'RAPGEF3', 'KCNH7', 'PRKG2', 'RAPGEF6', 'HCN1', 'HCN4', 'PRKG1', 'KCNH1', 'KCNH6']
Neur_chan_memb:55:p	23	13	21	13	7.1216	19456	0.00278819	0.00669627	238	87	94	15	['GLRA2', 'CHRNE', 'GABRA4', 'CHRNB1', 'GLRA3', 'HTR3C', 'GABRG1', 'CHRNA7', 'GABRG2', 'HTR3A', 'GABRA2', 'HTR3D', 'GABRP', 'CHRNB2', 'GLRB']
7tm_2:30:r	23	13	15	13	6.57816	19456	0.00278819	0.00669627	245	136	137	8	['CRHR2', 'LPHN2', 'EMR1', 'GPR115', 'LPHN3', 'ADCYAP1R1', 'GPR112', 'LPHN1']
Kringle:69:l	23	13	23	13	6.97575	19456	0.00278819	0.00669627	79	39	104	6	['F2', 'KREMEN2', 'LPA', 'PLAT', 'PLG', 'HGF']
Ion_trans:129:d	69	53	47	52	5.68561	19456	0.00279156	0.00669744	245	359	763	29	['KCNQ2', 'KCNG1', 'CACNA1C', 'KCNA2', 'CACNA1H', 'KCND2', 'NALCN', 'CACNA1D', 'KCNH5', 'SCN2A', 'TRPA1', 'SCN3A', 'ENSG00000254809', 'SCN9A', 'KCNB2', 'SCN7A', 'CACNA1A', 'KCNC4', 'CNGA2', 'TRPC1', 'ITPR2', 'KCNA3', 'SCN11A', 'KCNQ4', 'SCN10A', 'CACNA1B', 'SCN1A', 'SCN4A', 'TRPC3']
Filament:222:r	28	17	26	16	7.28756	19456	0.00279092	0.00669744	312	104	102	17	['KRT37', 'KRT17', 'KRT1', 'GFAP', 'LMNA', 'KRT36', 'BFSP2', 'KRT222', 'NEFM', 'KRT35', 'KRT2', 'KRT79', 'KRT9', 'KRT5', 'KRT4', 'KRT28', 'DES']
Cadherin:60:d	199	179	145	170	6.37668	19456	0.00288195	0.00691073	93	227	1363	60	['DSG4', 'CELSR1', 'CDH20', 'PCDH11X', 'PCDHGA6', 'FAT', 'CLSTN3', 'FAT4', 'DSG3', 'PCDHGA12', 'PCDHA8', 'PCDHA5', 'PCDHB5', 'PCDHGA1', 'CDH8', 'CDH3', 'PCDHA6', 'PCDHGB1', 'PCDHA4', 'PCDHB4', 'PCDHB3', 'FAT3', 'DCHS1', 'PCDHGB3', 'PCDHA1', 'PCDHB10', 'CDH9', 'CDH5', 'PCDHB1', 'PCDHGA5', 'CDH10', 'PCDHGA8', 'CDH1', 'PCDHGA7', 'CDH7', 'PCDHA9', 'PCDH10', 'PCDHA11', 'CLSTN2', 'CDH11', 'PCDHB7', 'PC…
Cadherin_2:41:g	40	27	31	27	7.48587	19456	0.00289929	0.00694874	83	178	127	15	['PCDHB12', 'PCDHA5', 'PCDH11Y', 'PCDH11X', 'PCDH9', 'PCDHA3', 'PCDHA4', 'PCDHB6', 'PCDHB5', 'PCDHB2', 'PCDHGA3', 'PCDHB3', 'PCDH18', 'PCDHB4', 'PCDHGA5']
Pkinase_Tyr:22:g	49	35	33	35	4.46356	19456	0.00299637	0.00714826	260	1213	1264	23	['ITK', 'CSF1R', 'RAF1', 'JAK2', 'SYK', 'TNK2', 'LMTK2', 'BMPR1B', 'EPHA3', 'FES', 'ROR2', 'MAP3K7', 'FER', 'ROR1', 'ACVRL1', 'JAK3', 'SRMS', 'STYK1', 'FGR', 'TGFBR2', 'ERBB3', 'DDR2', 'EPHA5']
Ank_2:49:a	82	65	56	65	4.89363	19456	0.00301695	0.00719368	84	529	1570	41	['ANK2', 'ANK1', 'RIPK4', 'TRPA1', 'ANKRD24', 'MIB2', 'ANKHD1', 'ASZ1', 'KIDINS220', 'ANKRD13B', 'TNKS', 'ILK', 'ANKK1', 'ESPNL', 'ASB5', 'NOTCH1', 'ANKRD23', 'FEM1C', 'ANKRD52', 'PPP1R16B', 'RAI14', 'CASKIN1', 'ANKRD45', 'ENSG00000254809', 'TRPC6', 'ANKRD43', 'ZDHHC17', 'DAPK1', 'HACE1', 'ANKS6', 'ANKFY1', 'ANKRD55', 'MIB1', 'FANK1', 'ANKRD10', 'TRPC3', 'EHMT2', 'ASB7', 'BCORL1', 'ANKRD50', 'INV…
KRAB:40:S	59	44	49	43	5.86785	19456	0.00303457	0.00723198	42	570	575	44	['ZNF570', 'ZNF215', 'ZNF716', 'ZNF684', 'ZNF415', 'ZNF732', 'ZNF324', 'ZNF528', 'ZNF195', 'ZNF485', 'ZNF433', 'ZNF547', 'ZNF479', 'ZNF343', 'ZNF418', 'ZNF799', 'ZNF98', 'ZNF679', 'ZNF180', 'ZNF681', 'ZNF709', 'ZNF445', 'ZNF311', 'ZNF440', 'ZNF667', 'ZNF417', 'ZNF320', 'ZNF780A', 'ZNF808', 'ZNF140', 'ZNF347', 'ZNF211', 'ZNF354C', 'ZFP28', 'ZNF665', 'ZNF77', 'ZNF561', 'ZNF777', 'ZNF20', 'ZNF175', …
7tm_1:177:t	42	29	31	29	4.82556	19456	0.00305683	0.00727756	268	839	843	23	['NPY5R', 'NPFFR2', 'HTR1A', 'ADRA1A', 'GPR26', 'CNR2', 'S1PR1', 'GHSR', 'HTR4', 'TAAR6', 'GPR153', 'GRPR', 'DRD5', 'LPAR2', 'CNR1', 'TAAR5', 'PTGER4', 'GPR119', 'DRD2', 'MC5R', 'GPR27', 'CHRM5', 'O3FAR1']
C2:92:l	42	29	30	29	5.23889	19456	0.00305683	0.00727756	103	325	633	23	['ESYT3', 'RAB11FIP2', 'MYOF', 'NEDD4L', 'SYTL3', 'SYT4', 'ESYT2', 'SYT7', 'UNC13A', 'SYT17', 'CPNE9', 'SYT11', 'PLCB4', 'RGS3', 'DYSF', 'MCTP1', 'SYT14', 'MCTP2', 'UNC13B', 'UNC13C', 'RASAL1', 'KIAA0528', 'CPNE5']
7tm_4:34:a	140	121	135	116	7.45536	19456	0.00322393	0.00766362	280	469	454	74	['OR10AG1', 'OR2AP1', 'OR5H2', 'OR52H1', 'OR11A1', 'OR3A1', 'OR14A16', 'OR6C4', 'OR5A1', 'OR6C70', 'OR11H12', 'OR4C46', 'OR7D2', 'OR2C1', 'OR4K13', 'OR51L1', 'OR52E2', 'OR8K5', 'OR1F1', 'OR1A2', 'OR5H6', 'OR2T10', 'OR4N5', 'OR9Q1', 'OR10P1', 'OR4D11', 'OR51M1', 'OR5AC2', 'OR8K1', 'OR4C15', 'OR2M3', 'OR14C36', 'OR4L1', 'OR9G1', 'OR5K2', 'OR6A2', 'OR10V1', 'OR6C75', 'OR10W1', 'OR11H6', 'OR10C1', 'O…
Ank_2:68:e	89	72	66	71	5.01181	19456	0.0032776	0.00778722	84	529	1570	36	['ANKRD50', 'NFKB1', 'CTTNBP2', 'TRPC3', 'ANK1', 'ANKS1A', 'ASB9', 'KANK1', 'ANKRD26', 'POTEH', 'MYO16', 'ASB10', 'ENSG00000254809', 'PPP1R16B', 'ASB2', 'ANKRD55', 'ANKHD1', 'TRPA1', 'INVS', 'FEM1C', 'ASB12', 'EHMT2', 'ANKRD24', 'TNKS', 'ANKS4B', 'ANK2', 'ANKS1B', 'ANKMY1', 'SNCAIP', 'MIB1', 'ASB15', 'ASB13', 'TRPC6', 'ANKRD5', 'NOTCH1', 'ASB16']
RRM_1:40:g	71	55	58	53	5.57446	19456	0.00329621	0.00782745	70	540	848	37	['HNRPLL', 'PPIE', 'TRA2A', 'PABPC3', 'RBM18', 'ELAVL2', 'CSTF2', 'U2AF2', 'SRSF5', 'PABPC4', 'RBM3', 'MSI2', 'CNOT4', 'RBM39', 'NONO', 'SLTM', 'BOLL', 'PABPC5', 'RBM28', 'RAVER2', 'LARP7', 'RBM10', 'ELAVL4', 'PABPC1L', 'SPEN', 'RBFOX1', 'HNRPDL', 'HNRNPH2', 'DAZL', 'ZRSR2', 'RBM46', 'RBM38', 'PABPN1L', 'ELAVL1', 'SFPQ', 'PTBP2', 'SRSF11']
ABC_tran:7:k	30	19	19	18	6.45219	19456	0.00337217	0.00800374	137	141	195	13	['ABCB4', 'ABCF2', 'ABCC10', 'ABCC9', 'ABCB5', 'ABCA9', 'ABCD2', 'ABCB10', 'ABCC5', 'ABCB8', 'ABCA8', 'ABCA3', 'ABCA4']
Cadherin:10:p	186	167	147	151	6.27922	19456	0.00350636	0.00828421	93	227	1363	65	['CDH11', 'PCDHB3', 'PCDHGB6', 'CDH2', 'PCDH11Y', 'PCDHGA1', 'FAT3', 'FAT4', 'PCDH9', 'PCDHAC1', 'PCDHA11', 'PCDHA4', 'PCDHGB2', 'DSC1', 'PCDH10', 'PCDHGB3', 'PCDHG', 'FAT2', 'PCDHA5', 'PCDHB5', 'PCDHGB1', 'CDH18', 'PCDHB10', 'DSG2', 'CELSR2', 'PCDHA2', 'PCDHB14', 'PCDHA1', 'PCDHGA3', 'PCDH1', 'PCDHA3', 'CDH12', 'CDH7', 'PCDHB13', 'DSG4', 'PCDHA12', 'PCDH12', 'CDHR1', 'CELSR3', 'DCHS1', 'PCDHB8',…
CUB:66:e	43	30	24	29	6.03974	19456	0.0035332	0.00833915	110	128	372	10	['CSMD3', 'CSMD2', 'MASP1', 'CUBN', 'TLL1', 'LRP10', 'LRP12', 'CDCP2', 'NRP1', 'PDGFD']
P53:118:t	43	30	11	30	9.5345	19456	0.0035332	0.00833915	196	33	33	1	['TP53']
Ank_2:21:d	63	48	53	46	4.51336	19456	0.00357884	0.00844257	84	529	1570	33	['ASB5', 'AGAP3', 'BARD1', 'HECTD1', 'ANKRD52', 'TRPA1', 'NOTCH2', 'EHMT1', 'ANK1', 'CLIP3', 'SNCAIP', 'GIT2', 'ANKRD65', 'MIB1', 'AGAP1', 'TRPC3', 'POTEC', 'ANKRD23', 'ASAP3', 'ASB1', 'ANKRD44', 'PLA2G6', 'PPP1R12A', 'CTTNBP2', 'NOTCH1', 'ASB10', 'ANKRD34B', 'ANKRD34C', 'ANKFY1', 'NRARP', 'ANKRD45', 'GABPB2', 'CLPB']
VWA:57:d	29	18	21	18	6.05641	19456	0.00365862	0.00860894	175	144	248	10	['COL6A3', 'COCH', 'COL12A1', 'MATN4', 'ITGA10', 'COL6A6', 'VWF', 'COL6A1', 'MATN1', 'COL22A1']
RCC1:26:P	29	18	20	18	6.26242	19456	0.00365862	0.00860894	50	45	215	13	['RCC1', 'NEK9', 'HERC1', 'HERC5', 'RCBTB2', 'RPGR', 'SERGEF', 'HERC2', 'HERC6', 'RCC2', 'ALS2', 'IBTK', 'HERC4']
SRCR:8:e	25	15	21	15	5.71967	19456	0.00371566	0.00872552	100	56	270	11	['LOXL2', 'SRCRB4D', 'CD163', 'DMBT1', 'LOXL4', 'MARCO', 'CD163L1', 'SCARA5', 'CD5L', 'MSR1', 'SSC5D']
p450:161:r	25	15	25	15	6.98913	19456	0.00371566	0.00872552	463	102	112	16	['CYP2J2', 'CYP2C8', 'CYP2B6', 'CYP1A1', 'CYP2U1', 'CYP2W1', 'CYP2C9', 'CYP2A6', 'CYP26A1', 'CYP4A22', 'CYP11B1', 'CYP11B2', 'CYP27A1', 'CYP2F1', 'CYP4F11', 'CYP2A13']
Filament:277:e	25	15	25	15	7.12406	19456	0.00371566	0.00872552	312	104	102	16	['KRT71', 'KRT222', 'KRT40', 'LMNA', 'KRT9', 'KRT6B', 'KRT19', 'KRT28', 'KRT1', 'KRT37', 'NEFH', 'KRT23', 'NEFM', 'KRT27', 'KRT15', 'KRT36']
Neur_chan_LBD:161:e	25	15	22	15	7.28869	19456	0.00371566	0.00872552	216	88	91	18	['CHRNG', 'GABRG2', 'GABRB3', 'GABRP', 'GABRB2', 'CHRNB2', 'GABRD', 'GLRB', 'HTR3E', 'CHRFAM7A', 'CHRNE', 'GABRA2', 'GABRG1', 'CHRNA1', 'GABRA5', 'HTR3C', 'GABRA1', 'GABRB1']
7tm_4:9:l	78	62	74	59	6.61148	19456	0.00374399	0.00878318	280	469	454	56	['OR1E2', 'OR6C70', 'OR2T35', 'OR10A2', 'OR6M1', 'OR10H1', 'OR4K14', 'OR2A42', 'OR6C2', 'OR52E4', 'OR4C11', 'OR3A1', 'OR51B5', 'OR10J1', 'OR4N2', 'OR1J4', 'OR4D9', 'OR2G6', 'OR5AS1', 'OR51F2', 'OR10Z1', 'OR10J3', 'OR3A2', 'OR5P2', 'OR4A47', 'OR4K17', 'OR6S1', 'OR6A2', 'OR13D1', 'OR1A2', 'OR2T2', 'OR6T1', 'OR4C13', 'OR52L1', 'OR5B12', 'OR8B3', 'OR14C36', 'OR4N4', 'OR13C9', 'OR4M1', 'OR6B2', 'OR10R…
ig:68:G	35	23	26	23	3.20911	19456	0.00376121	0.00881914	87	1005	2154	17	['VSTM4', 'FLT1', 'CD4', 'AGER', 'FCRL3', 'PDGFRB', 'LILRB5', 'FLT3', 'KDR', 'MYOM3', 'CD200', 'VSIG10', 'IL1RAPL2', 'LILRA4', 'VCAM1', 'CD33', 'EMB']
zf-met:17:k	53	39	40	39	6.14584	19456	0.0037925	0.00887907	25	281	426	25	['ZSCAN5B', 'ZNF385D', 'ZNF808', 'PRDM15', 'GZF1', 'ZNF385B', 'ZNF320', 'ZBTB20', 'ZNF652', 'ZNF700', 'ZNF319', 'ZNF582', 'SCAPER', 'SALL3', 'ZMAT4', 'ZNF341', 'ZNF346', 'ZFP64', 'HIC2', 'ZIC3', 'ZNF850', 'ZNF814', 'ZNF552', 'ZNF524', 'PRDM5']
Ig_2:49:n	64	49	39	49	4.46613	19456	0.00390905	0.00912896	79	811	1648	26	['LILRA1', 'CEACAM1', 'LAIR1', 'KIRREL3', 'FCRL3', 'FCRL5', 'PSG2', 'HSPG2', 'LILRB2', 'PSG1', 'IL1RAPL2', 'FCRL4', 'PSG9', 'LILRA2', 'SEMA7A', 'SIGLEC10', 'FCRL6', 'LILRB5', 'PSG6', 'SIGLEC12', 'IGSF9B', 'CD244', 'CNTN5', 'PSG4', 'CEACAM5', 'IGSF1']
Ras:125:e	37	25	32	25	6.22253	19456	0.00398455	0.00927271	162	274	282	21	['RAC1', 'RERG', 'RAB43', 'AGAP3', 'RALB', 'RHOB', 'RND3', 'RERGL', 'RND1', 'AGAP1', 'REM1', 'RAB3B', 'RAB3D', 'RIT2', 'ARHGAP35', 'DIRAS1', 'RAB38', 'DIRAS2', 'RASD2', 'RHOC', 'RSG1']
PH:90:e	37	25	31	25	5.33418	19456	0.00398455	0.00927271	105	511	522	24	['PLEKHH2', 'ARHGAP24', 'FGD4', 'NGEF', 'RTKN', 'ITK', 'DAPP1', 'GRB7', 'AFAP1L2', 'BTK', 'PLEKHD1', 'PLEKHA1', 'C10orf81', 'ASAP3', 'CADPS2', 'SKAP1', 'MCF2L', 'ARHGEF9', 'FGD3', 'FARP2', 'ARAP1', 'PLEK', 'PLEKHS1', 'ARAP3']
Pkinase_Tyr:126:v	37	25	28	25	4.0583	19456	0.00398455	0.00927271	260	1213	1264	13	['ERBB4', 'ERBB2', 'NTRK2', 'NPR2', 'DDR1', 'BTK', 'EGFR', 'ACVR1C', 'BMPR1B', 'TEC', 'PDGFRB', 'AXL', 'RIPK1']
Pkinase:239:d	79	63	57	63	5.1199	19456	0.00400715	0.00931597	264	1221	1293	38	['PRKCB', 'CAMK1', 'EIF2AK4', 'CAMKK1', 'GRK7', 'MAP2K3', 'DCLK2', 'WNK3', 'MARK2', 'TSSK2', 'MGC42105', 'MST4', 'MAP2K7', 'DCLK1', 'MAST4', 'CLK2', 'NEK8', 'MAP2K1', 'PRKACG', 'PRPF4B', 'CAMKK2', 'GRK5', 'CDK13', 'PRKG2', 'STK33', 'PAK7', 'MAP3K1', 'PSKH1', 'RPS6KA6', 'MAP3K4', 'ROCK2', 'TSSK1B', 'STK17A', 'STK24', 'CAMK1G', 'PBK', 'MAPK10', 'EIF2AK3']
7tm_1:166:r	79	63	60	62	5.73702	19456	0.00400715	0.00931597	268	839	843	43	['NPFFR2', 'ADRA1D', 'EDNRB', 'S1PR3', 'CXCR2', 'GPR119', 'HRH1', 'PTGER3', 'PTGIR', 'MTNR1B', 'GPR6', 'MC4R', 'ADRA1A', 'S1PR4', 'MAS1', 'GPR20', 'LPAR6', 'GPR21', 'GPR50', 'PPYR1', 'GPR153', 'OPN1LW', 'NTSR2', 'TAAR5', 'CCR2', 'HTR1A', 'HTR4', 'GPR37', 'S1PR1', 'HTR1B', 'GPR62', 'PROKR2', 'BDKRB2', 'GPR101', 'OPN4', 'P2RY14', 'FFAR3', 'FFAR2', 'ADRA1B', 'S1PR5', 'NPY2R', 'CHRM5', 'LPAR1']
Filamin:98:g	24	14	17	14	5.48966	19456	0.00403199	0.00935503	103	28	304	4	['FLNC', 'FLNB', 'TRIM2', 'FLNA']
Ldl_recept_b:1:g	24	14	24	14	6.3282	19456	0.00403199	0.00935503	42	28	170	6	['LRP1B', 'LRP1', 'LRP4', 'LRP5', 'LRP6', 'NID1']
BTB:91:a	24	14	21	14	5.83673	19456	0.00403199	0.00935503	111	223	239	17	['KBTBD10', 'KLHL38', 'ZBTB43', 'ZBTB7A', 'RHOBTB1', 'ZBTB1', 'KLHL1', 'BTBD2', 'ZBTB20', 'KLHL14', 'KLHL12', 'ABTB2', 'KBTBD8', 'ZBTB46', 'KLHL21', 'KLHL15', 'ZBTB3']
EF-hand_7:65:E	24	14	21	14	5.95623	19456	0.00403199	0.00935503	71	289	220	14	['PPP2R3A', 'KCNIP3', 'HPCAL1', 'GUCA1B', 'CABP4', 'FKBP14', 'SCGN', 'RCVRN', 'GUCA1A', 'LPCAT2', 'CALM3', 'PLS3', 'PPP3R1', 'CETN3']
7tm_1:257:g	82	66	68	65	5.79079	19456	0.00405546	0.00940477	268	839	843	40	['NPY1R', 'PROKR2', 'HTR4', 'GPR22', 'ADORA3', 'RRH', 'ADRA1A', 'CCR3', 'KISS1R', 'CCR8', 'MCHR2', 'GPR139', 'TACR3', 'GPR176', 'GPR44', 'P2RY13', 'HTR1D', 'NMUR2', 'GPR37', 'HTR2A', 'CXCR6', 'RXFP3', 'S1PR4', 'RXFP2', 'DRD5', 'GPR142', 'CMKLR1', 'CCBP2', 'SSTR2', 'GPR101', 'QRFPR', 'GPR87', 'FPR2', 'CCRL1', 'GPR4', 'HRH4', 'OPN5', 'P2RY4', 'CCRL2', 'GPR34']
Keratin_B2_2:15:s	31	20	30	20	6.4995	19456	0.00415436	0.00960063	45	53	195	8	['KRTAP9-9', 'KRTAP10-5', 'KRTAP4-3', 'KRTAP5-5', 'KRTAP4-6', 'KRTAP10-2', 'KRTAP4-7', 'KRTAP4-4']
Mito_carr:41:k	31	20	25	20	6.07892	19456	0.00415436	0.00960063	97	100	261	14	['SLC25A45', 'SLC25A29', 'SLC25A2', 'SLC25A32', 'SLC25A27', 'UCP1', 'SLC25A17', 'MCART2', 'SLC25A40', 'SLC25A6', 'SLC25A4', 'MTCH2', 'SLC25A48', 'SLC25A12']
Kelch_1:1:a	31	20	27	20	5.43794	19456	0.00415436	0.00960063	46	122	407	14	['KLHL5', 'KLHL8', 'HCFC2', 'KLHL34', 'LZTR1', 'KEAP1', 'KLHL20', 'KLHL15', 'IVNS1ABP', 'KLHL3', 'KLHL1', 'KBTBD5', 'KLHL4', 'KLHL38']
BTB:52:s	31	20	27	20	6.20596	19456	0.00415436	0.00960063	111	223	239	13	['BTBD19', 'RHOBTB2', 'KLHL31', 'ABTB1', 'ZBTB7B', 'ZBTB37', 'KLHL34', 'KBTBD12', 'KBTBD10', 'KLHL26', 'SPOP', 'KLHL4', 'NACC1']
Ig_2:36:g	54	40	42	37	4.22102	19456	0.004231	0.00975836	79	811	1648	22	['VSIG10L', 'CD244', 'HSPG2', 'FCRL5', 'FCRL3', 'FCRL1', 'TARM1', 'LILRA2', 'PSG2', 'CEACAM1', 'FCRL4', 'FCRLA', 'LILRB5', 'FCRLB', 'IGSF1', 'SIGLEC1', 'FCER1A', 'IL1RAPL2', 'FCRL6', 'CEACAM5', 'LILRA5', 'LAIR2']
fn3:62:g	169	151	124	145	4.99461	19456	0.00434017	0.00999033	85	419	3017	48	['USH2A', 'TTN', 'PTPRB', 'PTPRF', 'FN1', 'PTPRD', 'TNC', 'ROBO2', 'FNDC3B', 'EPHB3', 'TNXB', 'COL12A1', 'CMYA5', 'PTPRM', 'NRCAM', 'CHL1', 'COL20A1', 'BOC', 'PTPRO', 'IGFN1', 'CNTN6', 'TNR', 'DCC', 'PTPRH', 'MYBPC3', 'IL31RA', 'TEK', 'SDK1', 'NFASC', 'PTPRU', 'TIE1', 'L1CAM', 'KAL1', 'EPHA1', 'FNDC1', 'TRAD', 'DSCAM', 'EPHB4', 'TNN', 'ROBO1', 'MYBPC2', 'MYOM1', 'SDK2', 'MYBPC1', 'TYRO3', 'EPHA5'…
7tm_4:204:r	205	187	197	175	8.00556	19456	0.0045395	0.0104234	280	469	454	109	['OR9G1', 'OR11H6', 'OR5A1', 'OR4K1', 'OR10Q1', 'OR52N5', 'OR8K5', 'OR2L3', 'OR6C68', 'OR52E4', 'OR4D1', 'OR51B6', 'OR9Q2', 'OR3A2', 'OR2J3', 'OR1D2', 'OR51B4', 'OR11A1', 'OR6P1', 'OR4L1', 'OR2A5', 'OR2G6', 'OR2L1P', 'OR8A1', 'OR2M2', 'OR4A16', 'OR2M5', 'OR4D6', 'OR10J3', 'OR6C70', 'OR10G7', 'OR6Y1', 'OR5I1', 'OR4K17', 'OR2T10', 'OR2M7', 'OR2B11', 'OR51E2', 'OR5M3', 'OR10C1', 'OR2A12', 'OR2AP1', …
PDZ:47:G	57	43	33	42	5.53431	19456	0.00456477	0.0104762	82	388	700	26	['USH1C', 'MAST2', 'PCLO', 'DLG2', 'NOS1', 'PDZRN4', 'IL16', 'TAX1BP3', 'MPDZ', 'GRASP', 'GIPC2', 'LRRC7', 'PTPN13', 'MAGI1', 'TJP2', 'STXBP4', 'PDZD3', 'MAST1', 'MPP1', 'PDZD4', 'RGS3', 'SDCBP', 'PDZRN3', 'PDLIM3', 'LNX1', 'DVL3']
EGF_CA:17:v	153	135	100	129	6.64349	19456	0.00458658	0.0105211	42	189	871	27	['LTBP1', 'NOTCH1', 'FBN3', 'HMCN1', 'LTBP3', 'EGF', 'FBLN1', 'LTBP4', 'MATN2', 'FBN2', 'FBLN2', 'NID1', 'NPNT', 'FBN1', 'SCUBE1', 'BMP1', 'THBS4', 'EMR1', 'CD93', 'PROS1', 'LTBP2', 'FBLN5', 'EFEMP2', 'NOTCH2', 'TLL2', 'TLL1', 'FBLN7']
C2:79:d	66	51	46	51	5.89096	19456	0.0046707	0.0106982	103	325	633	28	['SYT1', 'SYT4', 'DYSF', 'CPNE4', 'SYNGAP1', 'PCLO', 'OTOF', 'CEP120', 'PRKCE', 'PLCZ1', 'SYT12', 'UNC13A', 'UNC13C', 'CPNE2', 'MYOF', 'HECW1', 'SYTL1', 'RPH3A', 'MCTP1', 'RASA4', 'RAB11FIP2', 'SYT7', 'C2CD3', 'PLCB2', 'PLA2G4A', 'UNC13D', 'PRKCG', 'UNC13B']
Laminin_G_2:80:n	45	32	35	32	6.61106	19456	0.00471653	0.0107926	126	111	262	12	['NRXN2', 'NRXN1', 'CNTNAP5', 'GAS6', 'CNTNAP4', 'LAMA3', 'CRB1', 'LAMA5', 'PROS1', 'USH2A', 'CNTNAP2', 'FAT3']
Pkinase_Tyr:167:k	45	32	26	31	4.3407	19456	0.00471653	0.0107926	260	1213	1264	16	['FGFR2', 'MAP3K10', 'RET', 'KDR', 'FLT1', 'TNK2', 'EPHB4', 'MATK', 'RAF1', 'JAK3', 'MAP3K11', 'ACVRL1', 'MST1R', 'ZAP70', 'FGFR4', 'PTK2B']
Ig_2:13:e	55	41	37	40	4.24749	19456	0.00472056	0.0107965	79	811	1648	22	['PSG1', 'LAIR2', 'CEACAM8', 'FCRL6', 'CD86', 'PSG5', 'PSG4', 'LILRA2', 'CEACAM5', 'CEACAM21', 'KIRREL3', 'HSPG2', 'IL1RL2', 'PSG6', 'FCRL5', 'PSG8', 'FCRL3', 'SIGLEC1', 'LILRA5', 'LILRB5', 'CEACAM6', 'PSG2']
zf-C2H2:20:i	378	365	301	315	6.02008	19456	0.00479645	0.0109539	23	1207	3315	178	['ZNF841', 'ZNF629', 'ZNF846', 'ZNF675', 'ZNF157', 'ZNF17', 'ZNF117', 'ZNF256', 'ZNF354A', 'ZNF189', 'ZNF721', 'ZNF33B', 'ZNF32', 'ZNF689', 'ZNF544', 'ZNF160', 'ZNF79', 'ZNF677', 'ZNF135', 'ZIC3', 'ZNF672', 'ZNF808', 'ZNF572', 'ZNF107', 'ZNF154', 'ZNF773', 'ZNF454', 'ZNF286B', 'ZNF554', 'ZNF211', 'RBAK', 'ZNF558', 'FEZF2', 'ZNF415', 'ZKSCAN1', 'ZNF470', 'ZNF225', 'ZNF510', 'ZNF534', 'ZNF669', 'ZN…
PDZ:74:k	60	46	34	46	5.60831	19456	0.00487057	0.0111014	82	388	700	25	['MAGI1', 'INADL', 'RAPGEF6', 'ARHGEF12', 'USH1C', 'DLG2', 'MPDZ', 'PDLIM5', 'LIN7C', 'PTPN13', 'MAGI3', 'PDZD3', 'PDZRN4', 'MPP7', 'LNX1', 'LNX2', 'TIAM2', 'GRIP1', 'MPP3', 'CASK', 'SNTG1', 'CNKSR2', 'SNX27', 'TJP2', 'SHROOM3']
SAM_1:53:r	26	16	22	16	6.07828	19456	0.00486877	0.0111014	64	185	219	9	['ARAP2', 'KAZN', 'SAMD3', 'PHC2', 'PPFIA2', 'ANKS1A', 'SAMD4B', 'SHANK1', 'PPFIBP1']
Cadherin_tail:13:l	26	16	1	16	8.46075	19456	0.00486877	0.0111014	133	42	42	19	['PCDHGA1', 'PCDHGA12', 'PCDHGA9', 'PCDHGC3', 'PCDHGB6', 'PCDHGC4', 'PCDHGA7', 'PCDHGB2', 'PCDHGA8', 'PCDHGB3', 'PCDHGB4', 'PCDHGC5', 'PCDHGB7', 'PCDHGA3', 'PCDHG', 'PCDHGA6', 'PCDHGA5', 'PCDHGB1', 'PCDHGA11']
Pkinase_Tyr:222:g	40	28	32	28	4.17078	19456	0.00488972	0.0111287	260	1213	1264	20	['LTK', 'TIE1', 'EPHA7', 'LMTK2', 'EGFR', 'ITK', 'TNK2', 'EPHA3', 'PDGFRA', 'JAK3', 'CSK', 'FLT4', 'FLT3', 'KDR', 'TGFBR2', 'HCK', 'BMX', 'ERBB4', 'ABL2', 'CSF1R']
Spectrin:98:e	40	28	25	27	5.0546	19456	0.00488972	0.0111287	105	94	685	11	['SPTBN4', 'SPTBN2', 'MACF1', 'SPTBN5', 'DST', 'SPTBN1', 'TRIO', 'SPTAN1', 'SYNE2', 'SPTB', 'ACTN1']
Homeobox:25:p	40	28	34	28	5.76031	19456	0.00488972	0.0111287	57	381	420	28	['OTP', 'EVX1', 'ESX1', 'HMX3', 'SIX5', 'MEOX2', 'VAX1', 'GSX1', 'ZFHX3', 'HOXA10', 'POU3F4', 'POU5F1B', 'DUXA', 'LHX9', 'POU6F2', 'LMX1A', 'HOXB7', 'LHX3', 'ZFHX4', 'HOXD10', 'HOXD4', 'PAX4', 'CUX2', 'HOXD9', 'HOXA2', 'HHEX', 'SATB2', 'LASS2']
SRCR:40:g	22	13	18	13	5.53525	19456	0.00496845	0.0112692	100	56	270	7	['CD6', 'MSR1', 'CD163L1', 'CD5L', 'CD163', 'LOXL4', 'DMBT1']
CUB:53:e	22	13	18	13	5.0729	19456	0.00496845	0.0112692	110	128	372	10	['TMPRSS7', 'NETO2', 'CUBN', 'ST14', 'GPR126', 'SCUBE1', 'BMP1', 'TLL1', 'PCOLCE', 'OVCH1']
Lectin_C:66:e	22	13	21	13	5.83727	19456	0.00496845	0.0112692	108	165	219	12	['CLEC2B', 'CLEC3B', 'ASGR1', 'CLEC4A', 'KLRC2', 'CLEC4E', 'PLA2R1', 'CLEC4D', 'COLEC12', 'FREM1', 'KLRC3', 'SELE']
RGS:86:s	22	13	13	13	6.80471	19456	0.00496845	0.0112692	118	107	112	6	['RGS3', 'RGS5', 'RGS8', 'RGS6', 'RGS1', 'RGS10']
Bromodomain:73:g	22	13	16	12	5.83727	19456	0.00496845	0.0112692	84	143	219	9	['BRWD1', 'PBRM1', 'PHIP', 'BRD7', 'TRIM66', 'TAF1L', 'BRDT', 'CREBBP', 'KAT2A']
C1_1:40:k	22	13	14	13	6.46231	19456	0.00496845	0.0112692	53	190	142	7	['UNC13C', 'DGKZ', 'PRKCG', 'ARHGAP29', 'PRKCQ', 'CDC42BPA', 'DGKH']
EGF_CA:13:p	110	93	76	91	6.16746	19456	0.00497373	0.0112757	42	189	871	30	['FBLN2', 'EFEMP2', 'NOTCH1', 'THBD', 'NPNT', 'THBS4', 'NELL2', 'FBLN1', 'FBN2', 'EGF', 'LRP1B', 'LTBP2', 'FBN3', 'FBN1', 'LTBP3', 'LTBP1', 'FBLN5', 'LTBP4', 'PROS1', 'NOTCH2NL', 'NID2', 'NOTCH4', 'NELL1', 'HEG1', 'NOTCH3', 'SCUBE1', 'THBS3', 'SCUBE3', 'ELTD1', 'LRP2']
Serpin:27:P	21	12	18	12	7.45748	19456	0.00506141	0.0114078	370	63	68	13	['SERPINB4', 'SERPINB10', 'SERPINB8', 'SERPINI2', 'SERPINB1', 'SERPINB7', 'SERPINA12', 'SERPINA10', 'SERPINA4', 'SERPINB12', 'SERPINA7', 'SERPINA9', 'SERPINB11']
NACHT:119:p	21	12	18	12	7.50055	19456	0.00506141	0.0114078	166	73	66	8	['NLRP10', 'NLRP3', 'NLRP4', 'NLRP14', 'NLRP2', 'NLRP1', 'NWD1', 'NLRP13']
p450:84:g	21	12	15	12	6.73759	19456	0.00506141	0.0114078	463	102	112	8	['CYP4F11', 'CYP2C19', 'CYP2A6', 'CYP2C18', 'CYP4B1', 'CYP4F3', 'CYP2C9', 'CYP26A1']
Hormone_recep:174:s	21	12	15	12	6.34527	19456	0.00506141	0.0114078	208	153	147	8	['ESR2', 'RARG', 'NR2E1', 'NR5A1', 'ESRRG', 'PPARG', 'NR2F6', 'NR1H3']
Gelsolin:19:d	21	12	15	12	6.84451	19456	0.00506141	0.0114078	76	33	104	7	['SCIN', 'GSN', 'CAPG', 'VIL1', 'AVIL', 'SVIL', 'SEC24A']
MORN:14:G	21	12	18	12	6.25033	19456	0.00506141	0.0114078	23	29	157	9	['JPH2', 'RSPH1', 'LOC728194', 'JPH3', 'JPH1', 'MORN3', 'ALS2CL', 'RSPH10B', 'ANKMY1']
C2-set_2:29:P	21	12	11	12	6.4054	19456	0.00506141	0.0114078	90	411	141	7	['CADM2', 'PVRL3', 'SIGLEC1', 'BCAM', 'AGER', 'CRTAM', 'PVRL4']
Y_phosphatase:102:k	21	12	14	12	6.00579	19456	0.00506141	0.0114078	235	152	186	6	['PTPRK', 'PTPRH', 'PTPRU', 'PTPRM', 'PTPRR', 'PTPN13']
7tm_3:80:r	21	12	17	12	7.99036	19456	0.00506141	0.0114078	234	47	47	8	['GRM7', 'TAS1R2', 'GRM5', 'GRM8', 'GRM1', 'GRM3', 'GRM2', 'GRM4']
E1-E2_ATPase:42:g	21	12	12	12	6.33549	19456	0.00506141	0.0114078	221	117	148	8	['ATP2A3', 'ATP2A1', 'ATP2B3', 'ATP2B4', 'ATP9A', 'ATP13A4', 'ATP1A2', 'ATP12A']
Cadherin:2:s	118	101	89	100	5.6227	19456	0.00510033	0.0114899	93	227	1363	41	['PCDH18', 'PCDHB15', 'FAT2', 'PCDHGB6', 'PCDHB4', 'FAT4', 'PCDHGA5', 'PCDHA8', 'CDH11', 'CDH7', 'FAT3', 'PCDHB6', 'PCDHGA12', 'PCDH7', 'CDH1', 'PCDHA6', 'PCDHAC2', 'PCDHG', 'CDH12', 'PCDH10', 'CLSTN3', 'PCDHA5', 'CELSR3', 'PCDHGA6', 'PCDH11Y', 'DCHS1', 'PCDHA7', 'CDH17', 'CDHR2', 'PCDHGC3', 'CDH18', 'PCDH17', 'PCDHGA9', 'CDH10', 'FAT', 'PCDHA10', 'CDH8', 'PCDHB3', 'PCDHB11', 'PCDHA13', 'CDH9']
Lectin_C:61:s	32	21	27	21	6.37784	19456	0.00511177	0.0115046	108	165	219	17	['CD209', 'MBL2', 'REG1A', 'MRC2', 'CLEC4D', 'CLEC3B', 'THBD', 'SFTPD', 'CLEC7A', 'LY75', 'SELL', 'OLR1', 'COLEC11', 'ATRN', 'CD93', 'ASGR1', 'NCAN']
Pkinase:231:s	70	55	53	55	4.94541	19456	0.0051887	0.0116721	264	1221	1293	40	['DYRK1B', 'WNK3', 'PIM1', 'STK16', 'ENSG00000132356', 'AKT2', 'PAK2', 'GRK7', 'PRKG1', 'STK4', 'CAMKK2', 'STK3', 'AKT1', 'NEK5', 'SBK1', 'ADRBK1', 'UHMK1', 'ENSG00000168038', 'MAP2K1', 'SgK269', 'RPS6KA2', 'STK36', 'RPS6KA6', 'MAPK4', 'AURKB', 'CDKL2', 'IRAK3', 'CLK2', 'TRIB3', 'MAST2', 'PRKAA1', 'SNRK', 'CDK14', 'PRKCI', 'PRKD3', 'CHEK1', 'MAP4K1', 'MAP4K3', 'PRKAA2', 'SGK2']
EGF:32:r	50	37	39	36	5.68014	19456	0.00520987	0.011714	32	245	555	15	['NOTCH3', 'JAG2', 'HSPG2', 'NRG4', 'NOTCH4', 'DLL3', 'NOTCH2', 'SLIT3', 'SLIT2', 'MEP1A', 'CRB2', 'DNER', 'EYS', 'NOTCH1', 'JAG1']
Pkinase:112:e	61	47	41	44	4.74686	19456	0.00529177	0.0118752	264	1221	1293	35	['TRAD', 'CDK18', 'MYO3A', 'IRAK1', 'AKT3', 'STK11', 'CAMK2B', 'TNIK', 'RPS6KA6', 'CDK16', 'MAPKAPK5', 'RPS6KA3', 'CHEK1', 'CASK', 'NEK10', 'CDK4', 'CSNK1A1L', 'RIPK4', 'SgK269', 'MAP2K5', 'OXSR1', 'TRIO', 'CSNK1D', 'ROCK2', 'DCLK1', 'PRKCI', 'CSNK1E', 'STK24', 'CDC42BPG', 'CHUK', 'MAPK4', 'TGFBR1', 'MAP2K3', 'NEK8', 'TSSK3']
I-set:33:s	195	178	132	168	4.86818	19456	0.00532063	0.0119227	90	839	3800	41	['TTN', 'TYRO3', 'FGFR2', 'ROBO2', 'DSCAM', 'CNTN1', 'IGSF22', 'NTRK3', 'CNTN2', 'ROBO1', 'PDGFRA', 'CNTN3', 'MDGA2', 'OPCML', 'CD101', 'IL1RL1', 'HMCN1', 'CNTN5', 'UNC5D', 'MYPN', 'OBSCN', 'CADM3', 'LINGO2', 'FGFR1', 'IGFN1', 'NEO1', 'PXDN', 'PAPLN', 'ROR1', 'MYOM2', 'IGSF10', 'PRTG', 'ROBO3', 'LINGO4', 'L1CAM', 'MYBPC1', 'HSPG2', 'CHL1', 'SDK1', 'DSCAML1', 'FLT4']
Cadherin:74:t	261	245	184	229	6.76797	19456	0.0053174	0.0119227	93	227	1363	63	['PCDHG', 'PCDHA10', 'FAT', 'PCDHGA7', 'PCDHGA5', 'PCDHA2', 'CDH10', 'PCDHB11', 'PCDHGB4', 'PCDHA9', 'PCDHGC5', 'PCDHA8', 'PCDH10', 'PCDHGA1', 'PCDHA5', 'PCDHA11', 'CDHR1', 'FAT4', 'DSC1', 'PCDHGC3', 'PCDHGB6', 'PCDHA4', 'CELSR2', 'PCDHA12', 'PCDHB4', 'DSG3', 'PCDHAC1', 'PCDHA6', 'PCDH7', 'FAT3', 'PCDHGA6', 'PCDHGA3', 'PCDHB15', 'PCDH1', 'PCDHAC2', 'PCDHB13', 'PCDH17', 'CDH17', 'CELSR3', 'CDH22',…
Laminin_G_2:72:D	34	23	21	23	6.20667	19456	0.0055163	0.0123434	126	111	262	9	['EGFLAM', 'NRXN1', 'CNTNAP5', 'CNTNAP2', 'CELSR2', 'CRB1', 'LAMA5', 'CNTNAP4', 'PROS1']
7tm_4:94:v	97	81	95	79	6.92599	19456	0.00555831	0.012421	280	469	454	54	['OR51G2', 'OR10AG1', 'OR51A7', 'OR6C75', 'OR10H5', 'OR6K6', 'OR1M1', 'OR5B21', 'OR52N1', 'OR52L1', 'OR4B1', 'OR2T27', 'OR56A3', 'OR11L1', 'OR10S1', 'OR5V1', 'OR4C12', 'OR2A14', 'OR13C5', 'OR2T12', 'OR10J3', 'OR8H1', 'OR2B11', 'OR2AK2', 'OR5F1', 'OR4C6', 'OR5B17', 'OR4C3', 'OR13G1', 'OR2T6', 'OR10A3', 'OR8D1', 'OR51L1', 'OR10G4', 'OR8K1', 'OR51I1', 'OR2H2', 'OR10Q1', 'OR8D4', 'OR52N5', 'OR5M3', '…
LRR_8:38:t	145	128	119	119	6.31017	19456	0.00561687	0.0125442	61	364	1040	71	['CHADL', 'LINGO4', 'ISLR', 'TLR4', 'TLR8', 'RSU1', 'LRRIQ4', 'LRIT1', 'SLITRK1', 'LRRC4', 'LRRC8D', 'CD180', 'LRRC32', 'LRRTM3', 'PXDNL', 'LRRC52', 'LRRN2', 'LRRC8E', 'PODN', 'LRRC3', 'LINGO2', 'LRCH3', 'LRIG3', 'LRRC18', 'GPR124', 'LRRC55', 'FLRT2', 'LRRN1', 'SHOC2', 'SLIT3', 'IGFALS', 'PODNL1', 'TLR9', 'RXFP2', 'Q7Z2Q7', 'LGI1', 'ERBB2IP', 'LRRC30', 'LRRTM4', 'LRRTM1', 'PRELP', 'SCRIB', 'LRTM1…
Ion_trans:215:v	74	59	51	58	5.78654	19456	0.0056539	0.0126148	245	359	763	31	['HCN2', 'SCN8A', 'SCN1A', 'CACNA1C', 'SCN9A', 'CACNA1I', 'KCNV2', 'KCNQ2', 'TRPC3', 'SCN2A', 'SCN7A', 'SCN11A', 'TRPV2', 'KCNH6', 'KCNMA1', 'KCNH5', 'TRPM3', 'KCNC3', 'KCNH2', 'CACNA1D', 'KCNG2', 'CNGA1', 'NALCN', 'TRPV1', 'CACNA1B', 'CACNA1H', 'KCNV1', 'SCN4A', 'KCNG1', 'CACNA1E', 'CNGA4']
BTB:60:e	28	18	26	17	6.05912	19456	0.00571277	0.0127096	111	223	239	18	['ZBTB8A', 'KLHL20', 'KLHL36', 'BTBD3', 'IPP', 'RCBTB2', 'ZBTB46', 'ZBTB24', 'IBTK', 'KBTBD8', 'RHOBTB2', 'BTBD8', 'ZFP161', 'ZBTB39', 'ZBTB45', 'KLHL38', 'ZBTB25', 'BTBD17']
p450:372:r	28	18	27	18	7.15263	19456	0.00571277	0.0127096	463	102	112	10	['CYP11B1', 'CYP2A6', 'CYP4F3', 'CYP4F11', 'CYP2A13', 'CYP3A4', 'CYP4A11', 'CYP46A1', 'CYP2B6', 'CYP11B2']
Mito_carr:19:a	28	18	23	18	5.93208	19456	0.00571277	0.0127096	97	100	261	15	['SLC25A25', 'SLC25A12', 'SLC25A28', 'SLC25A2', 'SLC25A21', 'UCP2', 'SLC25A3', 'SLC25A36', 'SLC25A35', 'UCP3', 'SLC25A32', 'SLC25A47', 'UCP1', 'SLC25A22', 'SLC25A11']
I-set:5:q	133	116	99	111	4.31613	19456	0.00575285	0.0127927	90	839	3800	33	['CNTN3', 'TTN', 'PTPRD', 'KDR', 'HMCN1', 'CNTN4', 'MUSK', 'NTM', 'GPR125', 'MYPN', 'NCAM2', 'CNTN5', 'OBSCN', 'BOC', 'LRFN5', 'IGSF10', 'FLT1', 'DSCAM', 'ROBO2', 'ROBO1', 'PTK7', 'DSCAML1', 'LSAMP', 'DCC', 'L1CAM', 'ROBO3', 'EMB', 'IGSF22', 'MYBPC3', 'NEGR1', 'LRRC4C', 'LRFN4', 'OBSL1']
LRR_8:27:L	65	51	60	49	5.15263	19456	0.0059608	0.0132361	61	364	1040	36	['PXDNL', 'LRRC33', 'RTN4RL2', 'LRFN4', 'TLR4', 'LRRC4B', 'SLIT2', 'LRRC59', 'IGSF10', 'LRRC15', 'LRRN1', 'SLITRK5', 'TLR3', 'TLR7', 'LRRN3', 'LRIG3', 'LRRN2', 'LRRC28', 'LRRTM1', 'LRRC17', 'FLRT2', 'LGR4', 'LRRD1', 'LRIG1', 'LRRC66', 'LRRIQ4', 'LRRC52', 'TSKU', 'RTN4RL1', 'TLR1', 'RXFP1', 'LRRC55', 'LRCH2', 'SLITRK6', 'GPR125', 'LINGO1']
C2:63:a	65	51	45	48	5.86894	19456	0.0059608	0.0132361	103	325	633	32	['ITSN1', 'SYT4', 'OTOF', 'UNC13A', 'RIMS2', 'DAB2IP', 'SYT16', 'DYSF', 'PLCB2', 'MCTP1', 'SYTL1', 'SYT7', 'SYT10', 'CPNE4', 'SYT3', 'PLA2G4A', 'PRF1', 'TC2N', 'PRKCE', 'MYOF', 'MCTP2', 'SYNGAP1', 'C2CD4D', 'CC2D1A', 'BCR', 'SYTL2', 'RPGRIP1', 'ESYT2', 'PLCZ1', 'CPNE9', 'PCLO', 'HECW2']
Pkinase:235:e	81	66	58	65	5.15597	19456	0.00605749	0.0134444	264	1221	1293	45	['PRKAA2', 'C9orf96', 'GSK3B', 'GSK3A', 'DAPK2', 'TAOK3', 'MAPK7', 'MAST2', 'MAPK12', 'STK17A', 'MAST1', 'NEK5', 'CAMK2B', 'PHKG1', 'PRKG1', 'MAP4K1', 'STK36', 'BRSK2', 'PIM2', 'TAOK2', 'CDK7', 'CAMK2G', 'IRAK1', 'STK10', 'MAP2K4', 'MYLK4', 'GRK6', 'MARK2', 'SgK269', 'DYRK2', 'RPS6KC1', 'WNK4', 'GAK', 'DYRK3', 'MYO3A', 'DMPK', 'WNK2', 'ENSG00000132356', 'HIPK2', 'AURKB', 'PRKCQ', 'PAK7', 'GRK7', …
zf-C2H2:7:g	301	287	259	260	5.69146	19456	0.00624683	0.0138185	23	1207	3315	174	['ZNF569', 'REPIN1', 'ZNF383', 'PRDM16', 'ZNF287', 'HIC1', 'PRDM9', 'ZNF555', 'ZKSCAN2', 'ZFX', 'SP3', 'ZFP1', 'ZNF746', 'ZNF432', 'ZSCAN5A', 'ZNF648', 'ZNF444', 'ZNF484', 'ZNF677', 'ZNF177', 'ZNF324B', 'ZNF184', 'ZNF646', 'ZNF701', 'ZNF670', 'ZNF85', 'ZNF675', 'ZNF680', 'ZNF157', 'ZNF107', 'ZBTB17', 'ZNF391', 'ZNF175', 'ZNF10', 'ZNF780A', 'ZNF43', 'KLF3', 'ZNF845', 'ZNF100', 'ZNF627', 'ZNF35', '…
PDZ:48:D	63	49	37	49	5.6787	19456	0.00625663	0.0138336	82	388	700	23	['SLC9A3R2', 'PDZD3', 'INADL', 'DFNB31', 'PDZRN4', 'DLG1', 'SDCBP2', 'GRIP1', 'MPDZ', 'MAGI1', 'LMO7', 'DLG2', 'GRASP', 'LIN7A', 'LNX1', 'MAGI2', 'HTRA1', 'RAPGEF2', 'GIPC2', 'PDLIM1', 'FRMPD1', 'LNX2', 'CASK']
Cadherin_2:6:v	33	22	24	22	7.20834	19456	0.00626461	0.0138381	83	178	127	16	['PCDHA9', 'PCDHA12', 'PCDH11X', 'PCDHGA11', 'PCDHA8', 'PCDHA3', 'PCDHB7', 'PCDHA2', 'PCDHGC4', 'PCDHB4', 'PCDHGA5', 'PCDHGA7', 'PCDHA5', 'PCDHA13', 'PCDH18', 'PCDHA11']
Lectin_C:60:g	33	22	27	22	6.42224	19456	0.00626461	0.0138381	108	165	219	22	['CLEC4C', 'MBL2', 'CLEC4G', 'LY75', 'CLEC2D', 'REG1A', 'ASGR1', 'SELL', 'KLRD1', 'KLRC2', 'MRC2', 'CD209', 'PLA2R1', 'CHODL', 'CD93', 'FCER2', 'CLEC4E', 'SFTPA1', 'ATRNL1', 'KLRG1', 'CLEC4M', 'CLEC3A']
Y_phosphatase:60:r	27	17	14	17	6.36836	19456	0.00634411	0.0139871	235	152	186	6	['PTPRU', 'PTPN5', 'PTPN4', 'PTPRA', 'PTPN1', 'PTPRJ']
Lectin_C:45:g	27	17	23	17	6.13273	19456	0.00634411	0.0139871	108	165	219	17	['KLRC2', 'LY75', 'PLA2R1', 'CD93', 'CLEC4C', 'CLEC3A', 'CLEC2D', 'REG3G', 'REG1B', 'CLEC4F', 'MRC2', 'COLEC11', 'CLEC4M', 'FREM1', 'NCAN', 'CLEC19A', 'CLEC1B']
BTB:39:a	27	17	24	17	6.00665	19456	0.00634411	0.0139871	111	223	239	17	['KLHL25', 'KLHL9', 'ZBTB48', 'KLHL14', 'ZBTB47', 'KBTBD10', 'SPOPL', 'ZBTB12', 'KBTBD5', 'RHOBTB3', 'RCBTB2', 'BTBD2', 'CCIN', 'ZNF295', 'KLHL30', 'RHOBTB1', 'BTBD3']
ANF_receptor:342:t	27	17	19	17	7.39972	19456	0.00634411	0.0139871	352	92	91	9	['GRIK3', 'GRM3', 'GRM7', 'GRIK2', 'GRM2', 'GRM8', 'GRID2', 'GRIA4', 'NPR3']
WD40:9:G	107	91	83	88	5.28954	19456	0.00637858	0.0140564	38	506	1557	51	['PAFAH1B1', 'DCAF8', 'EML1', 'PAK1IP1', 'WDR27', 'TRAF7', 'SPAG16', 'WDR31', 'MAPKBP1', 'WDR33', 'WDTC1', 'NLE1', 'EML2', 'FBXW7', 'DCAF8L2', 'EML3', 'CHAF1B', 'POC1B', 'APAF1', 'UTP15', 'CORO2A', 'BRWD3', 'RBBP7', 'GNB3', 'WDR5B', 'WDR23', 'WDR69', 'GNB2', 'TBL1Y', 'STRN', 'WDR25', 'WDR90', 'CORO6', 'TLE3', 'CORO1C', 'FZR1', 'KIF21B', 'WDR82', 'WDR61', 'DTL', 'GNB4', 'DCAF5', 'WDR65', 'NWD1', '…
LRR_6:19:G	42	30	38	30	5.84451	19456	0.00644784	0.0142023	24	158	416	20	['NLRP12', 'FBXL6', 'NLRP9', 'NLRP5', 'NLRP14', 'NLRP13', 'NLRP8', 'RLTPR', 'NLRP3', 'NLRP2', 'FBXL17', 'FBXL2', 'NOD2', 'NLRP4', 'C14orf166B', 'FBXL13', 'RANGAP1', 'LRRC16B', 'TCTE1', 'NLRC5']
BTB_2:50:p	23	14	23	14	7.46674	19456	0.0065097	0.0143115	94	74	74	12	['KCNA7', 'KCNF1', 'KCNA2', 'KCNA3', 'KCNA5', 'KCNC1', 'KCNA4', 'KCNA10', 'KCNV1', 'KCNA1', 'KCTD13', 'KCND2']
Histone:60:d	23	14	23	14	7.722	19456	0.0065097	0.0143115	132	61	62	13	['HIST1H3J', 'HIST2H2AB', 'HIST1H2AJ', 'H3F3A', 'HIST1H2BA', 'H3F3C', 'HIST3H3', 'H2BFWT', 'HIST1H2BN', 'HIST2H2BE', 'HIST1H2AC', 'HIST1H2AD', 'HIST2H2AC']
Cadherin:40:e	220	204	151	192	6.52142	19456	0.00657358	0.0144383	93	227	1363	66	['PCDH11X', 'PCDHA2', 'CDH26', 'CDH11', 'FAT2', 'PCDHB1', 'CDHR1', 'FAT4', 'PCDHA8', 'CDH15', 'PCDHA11', 'PCDHB4', 'CDH17', 'PCDHA4', 'CDH23', 'PCDH11Y', 'PCDHAC2', 'PCDHGA7', 'PCDHG', 'PCDHGA5', 'DSC1', 'PCDHGA11', 'CDH3', 'PCDHB2', 'PCDHA9', 'FAT', 'FAT3', 'PCDHA13', 'PCDH9', 'PCDHGA1', 'CDH2', 'PCDHB13', 'PCDH19', 'CDH7', 'CDH1', 'PCDHB5', 'PCDHGA6', 'PCDHA5', 'CELSR3', 'PCDHGA8', 'PCDHB11', '…
Ig_3:15:e	132	116	97	112	4.83015	19456	0.0067409	0.014764	79	936	2641	48	['PTPRD', 'NPHS1', 'CADM2', 'NRCAM', 'CEACAM8', 'AXL', 'ROBO2', 'CNTN5', 'CD276', 'NFASC', 'ROBO1', 'HMCN1', 'DSCAM', 'PSG5', 'CNTN2', 'CEACAM5', 'IGDCC3', 'JAM3', 'HSPG2', 'PXDNL', 'CHL1', 'OPCML', 'SIGLEC12', 'IGDCC4', 'DSCAML1', 'CNTN6', 'MDGA1', 'CNTN3', 'KIRREL2', 'FLT4', 'MAG', 'PSG8', 'VCAM1', 'KDR', 'PTK7', 'SIGLEC8', 'BOC', 'CSF1R', 'SDK2', 'CILP', 'CNTN4', 'NEGR1', 'PRTG', 'LRIG2', 'IGS…
Sushi:26:e	120	104	77	101	6.40131	19456	0.00678588	0.0148555	56	146	808	24	['CSMD3', 'CR1', 'SEZ6L2', 'CFH', 'PAPPA', 'CSMD2', 'CD46', 'CFHR2', 'SRPX2', 'CFHR5', 'BCAN', 'FBLN7', 'C1S', 'CFHR4', 'C4BPA', 'CFHR1', 'CR1L', 'SEZ6', 'C4BPB', 'SUSD1', 'SUSD4', 'SELE', 'F13B', 'KIAA0247']
Cadherin_2:68:g	37	26	26	26	7.3734	19456	0.00681108	0.0148687	83	178	127	12	['PCDHA10', 'PCDHA6', 'PCDHA3', 'PCDH8', 'PCDHGA1', 'PCDHB2', 'PCDHB11', 'PCDHA1', 'PCDHGB1', 'PCDH17', 'PCDHG', 'PCDHA11']
BTB:65:e	37	26	28	26	6.46122	19456	0.00681108	0.0148687	111	223	239	23	['BTBD8', 'ZNF278', 'IPP', 'LZTR1', 'KLHL8', 'ANKFY1', 'BTBD3', 'CCIN', 'KLHL1', 'ZBTB43', 'KLHL13', 'BCL6B', 'SLX4', 'RCBTB1', 'BTBD7', 'BTBD6', 'PATZ1', 'BTBD11', 'BACH2', 'BTBD17', 'RHOBTB2', 'RCBTB2', 'KLHL12']
Pkinase_Tyr:193:G	37	26	29	26	4.0583	19456	0.00681108	0.0148687	260	1213	1264	25	['MAP3K7', 'DSTYK', 'ARAF', 'STYK1', 'EPHA7', 'FGFR2', 'EPHA2', 'GUCY2C', 'JAK2', 'ROR2', 'PDGFRB', 'PDGFRA', 'ROS1', 'PTK2B', 'KIT', 'KSR2', 'NTRK2', 'NTRK3', 'LCK', 'ERBB4', 'TESK1', 'FLT3', 'MUSK', 'TYRO3', 'FGFR4']
Pkinase_Tyr:81:e	37	26	29	26	4.0583	19456	0.00681108	0.0148687	260	1213	1264	21	['INSRR', 'JAK1', 'FGFR2', 'HCK', 'TEX14', 'EPHA3', 'EPHA5', 'MUSK', 'MST1R', 'SYK', 'CSK', 'EPHA1', 'ALK', 'EPHB3', 'EPHA8', 'AXL', 'TYRO3', 'TIE1', 'JAK3', 'LYN', 'ARAF']
Ig_3:46:s	83	68	70	66	4.1608	19456	0.00682037	0.014875	79	936	2641	31	['LRIG1', 'MUSK', 'PXDNL', 'CNTN3', 'SDK2', 'PTPRD', 'CNTN6', 'L1CAM', 'DSCAML1', 'HMCN1', 'MDGA1', 'NCAM2', 'PSG4', 'HSPG2', 'CDON', 'PSG2', 'IGSF10', 'IGDCC3', 'CEACAM6', 'NRCAM', 'CHL1', 'MDGA2', 'JAM2', 'CNTN5', 'CNTN4', 'LRIG3', 'DSCAM', 'FLT1', 'FGFRL1', 'OBSL1', 'BOC']
Ank_2:14:k	55	42	43	42	4.31744	19456	0.00681831	0.014875	84	529	1570	33	['ANKRD22', 'ANKRD44', 'ASB7', 'CTTNBP2', 'ZDHHC17', 'ANKRD20A2', 'ASB3', 'POTE2', 'ANKRD52', 'ANKRD49', 'ANK2', 'GABPB2', 'CASKIN2', 'CASKIN1', 'GABPB1', 'ENSG00000254809', 'OSTF1', 'ENSG00000174501', 'ANKRD24', 'TRPC3', 'ASB15', 'BCL3', 'ANKRD5', 'ANKAR', 'MYO16', 'RNASEL', 'ANKRD26', 'GLS', 'ASZ1', 'NOTCH3', 'ANKRD1', 'ESPNL', 'TANC2']
SRCR:31:e	29	19	22	19	5.93379	19456	0.00700005	0.0152526	100	56	270	8	['DMBT1', 'CD163', 'LOXL2', 'CD163L1', 'PRSS12', 'LGALS3BP', 'LOXL3', 'CD6']
Trypsin:136:s	29	19	26	19	6.20326	19456	0.00700005	0.0152526	221	210	224	17	['CELA1', 'PRSS58', 'C1S', 'HABP2', 'PRSS38', 'KLK8', 'F10', 'PLAT', 'TMPRSS11B', 'PRSS27', 'TMPRSS3', 'CELA3B', 'PRSS36', 'CELA3A', 'KLK6', 'C1RL', 'TMPRSS15']
V-set:65:r	53	40	45	39	5.74612	19456	0.00710666	0.0154631	109	958	562	30	['CEACAM5', 'PSG6', 'SIGLEC7', 'CD86', 'CEACAM1', 'CXADR', 'TREM1', 'TMIGD2', 'IGSF21', 'PVRL4', 'CD101', 'PSG2', 'CEACAM21', 'PSG5', 'PSG9', 'CD300A', 'SIGLEC12', 'AMICA1', 'HAPLN4', 'HAVCR2', 'CD300LG', 'TIMD4', 'HAPLN3', 'CEACAM19', 'PSG3', 'CD8A', 'SIGLEC6', 'CTLA4', 'IGSF6', 'PSG4']
Homeobox:57:k	45	33	41	33	5.93024	19456	0.00722762	0.0157116	57	381	420	31	['LMX1B', 'ZFHX4', 'LHX4', 'HOXB6', 'MSX2', 'PITX2', 'MNX1', 'PBX4', 'NKX2-2', 'HOXD12', 'POU4F3', 'HOXA13', 'PAX4', 'HOXC12', 'ESX1', 'HOXB5', 'NKX3-1', 'LMX1A', 'PRRX1', 'LHX2', 'NKX2-1', 'VENTX', 'HOPX', 'POU1F1', 'LHX5', 'NKX2-5', 'NKX6-2', 'HOXB7', 'BARHL1', 'CUX2', 'HOXA10']
Laminin_EGF:42:p	45	33	35	33	6.1647	19456	0.00722762	0.0157116	49	68	357	17	['LAMB1', 'PEAR1', 'LAMB3', 'LAMB4', 'LAMC3', 'NTN5', 'USH2A', 'LAMA1', 'LAMA2', 'LAMA3', 'LAMA5', 'NTN4', 'LAMB2', 'LAMC1', 'NTN3', 'MEGF10', 'NTNG1']
WD40:29:s	126	110	93	106	5.52536	19456	0.00728314	0.0158249	38	506	1557	64	['CORO2B', 'PLRG1', 'WDR47', 'TBL1XR1', 'IFT172', 'FBXW7', 'WDR89', 'DCAF8L2', 'EML2', 'WDTC1', 'TRAF7', 'WDR70', 'WDR3', 'GNB1', 'RRP9', 'NUP43', 'WDR44', 'GNB2', 'TBL1X', 'EML6', 'WDR23', 'WDR5', 'ELP2', 'FZR1', 'PRPF4', 'BRWD3', 'CDC40', 'TSSC1', 'WDR81', 'DCAF8L1', 'EML1', 'WDR7', 'PAFAH1B1', 'CIAO1', 'EML4', 'TEP1', 'DCAF4L2', 'SEC13', 'NLE1', 'PEX7', 'WDR83', 'WDR61', 'WDR33', 'KIAA1875', '…
7tm_4:6:l	91	76	90	70	6.83388	19456	0.00736138	0.0159725	280	469	454	63	['OR4F17', 'OR52N4', 'OR13C4', 'OR4D11', 'OR5AP2', 'OR4A15', 'OR8H3', 'OR6C2', 'OR13D1', 'OR8B12', 'OR2W1', 'OR52D1', 'OR4A5', 'OR10G9', 'OR5A1', 'OR10J5', 'OR2T4', 'OR11L1', 'OR4N4', 'OR2M3', 'OR56A1', 'OR52J3', 'OR51D1', 'OR51V1', 'OR4L1', 'OR4B1', 'OR2AT4', 'OR2A4', 'OR8K1', 'OR6C68', 'OR6V1', 'OR2AE1', 'OR5P2', 'OR5L2', 'OR6B3', 'OR8H1', 'OR2A12', 'OR2T10', 'OR6P1', 'OR2G3', 'OR4K2', 'OR5P3',…
Ig_3:41:k	136	120	89	117	4.87322	19456	0.00766364	0.016582	79	936	2641	49	['ROBO2', 'ROBO4', 'HMCN1', 'PVRL4', 'IGDCC3', 'NFASC', 'CNTN1', 'CNTN5', 'OPCML', 'CNTN4', 'CHL1', 'PSG1', 'NPHS1', 'IL1RAP', 'FCRL1', 'HSPG2', 'JAM2', 'NRCAM', 'FLT1', 'LRIG2', 'PTK7', 'NEGR1', 'SIGLEC12', 'L1CAM', 'ROBO1', 'PTPRD', 'MUSK', 'PSG4', 'IGSF10', 'CNTN6', 'LRIT3', 'CADM3', 'FGFR3', 'FCER1A', 'VSIG10', 'PXDNL', 'IGSF9', 'KIRREL3', 'CEACAM5', 'ROBO3', 'CD22', 'MDGA2', 'LSAMP', 'PDGFRB…
MFS_1:92:r	31	21	24	21	6.14104	19456	0.00769491	0.0166264	353	229	250	18	['SLC18A1', 'SLC45A3', 'SLC16A10', 'MFSD1', 'SLC17A1', 'MFSD8', 'SLC22A9', 'SLC17A2', 'SLC16A5', 'SLC16A4', 'SLC46A3', 'SV2B', 'SLC17A4', 'SLC16A13', 'SVOPL', 'SLC22A24', 'SLC22A7', 'SLC18A3']
LIM:52:k	31	21	24	21	5.4344	19456	0.00769491	0.0166264	58	181	408	18	['LHX9', 'LMCD1', 'LMX1A', 'TGFB1I1', 'ISL1', 'LHX3', 'ISL2', 'LHX8', 'LASP1', 'NRAP', 'ABLIM3', 'FBLIM1', 'LMX1B', 'NEBL', 'TRIP6', 'CSRP1', 'LPXN', 'PDLIM7']
Cadherin_C_2:55:h	31	21	21	21	7.89737	19456	0.00769491	0.0166264	85	86	74	9	['PCDHGA12', 'PCDHA9', 'PCDHGA5', 'PCDHGA1', 'PCDHA7', 'PCDHGA3', 'PCDHB14', 'PCDHB15', 'PCDHGA6']
Ion_trans:64:r	75	61	53	60	5.80591	19456	0.00801138	0.0172861	245	359	763	27	['TPCN2', 'KCNG1', 'CACNA1C', 'CACNA1B', 'KCND2', 'HCN4', 'KCNQ1', 'SCN10A', 'HCN3', 'SCN11A', 'SCN1A', 'CACNA1A', 'TRPC6', 'KCNH6', 'SCN7A', 'CACNA1H', 'KCNH2', 'KCNV2', 'TRPC1', 'ENSG00000254809', 'CNGA4', 'CACNA1F', 'KCNB1', 'CACNA1I', 'KCNA1', 'CACNA1E', 'KCNG2']
Ig_3:49:s	100	85	64	81	4.42962	19456	0.0080731	0.0174032	79	936	2641	29	['CNTN4', 'ROBO2', 'ROBO3', 'HEPACAM2', 'HMCN1', 'PSG8', 'VCAM1', 'NTM', 'CNTN1', 'NFASC', 'SIGLEC12', 'DSCAM', 'DSCAML1', 'HSPG2', 'ROBO1', 'SDK2', 'PRTG', 'FSTL5', 'CSF1R', 'NCAM2', 'CEACAM5', 'PDGFRB', 'FLT1', 'CEACAM6', 'L1CAM', 'PTK7', 'NEGR1', 'NEO1', 'PSG4']
LRR_8:50:s	100	85	84	83	5.77412	19456	0.0080731	0.0174032	61	364	1040	46	['ISLR', 'LRFN2', 'SLITRK5', 'LRRN4', 'TLR8', 'LRIG1', 'LRRC33', 'SLIT3', 'TLR4', 'KERA', 'LINGO2', 'NYX', 'IGSF10', 'LRRC3C', 'LINGO4', 'LRRC4', 'LRCH4', 'ASPN', 'LRRC57', 'LRIG3', 'TLR5', 'LINGO1', 'RXFP1', 'LRRC8D', 'SLITRK1', 'LUM', 'SHOC2', 'LRRTM1', 'CHADL', 'LRRN1', 'RXFP2', 'LRRC4C', 'LRRN3', 'LGR5', 'LRRC69', 'TLR9', 'FLRT3', 'LRTM1', 'LRRK2', 'LRRTM4', 'LRRC1', 'SLIT2', 'LRRTM3', 'FLRT1…
PH:71:e	46	34	33	33	5.64829	19456	0.00810688	0.0174598	105	511	522	21	['AFAP1', 'CYTH2', 'APBB1IP', 'DNM2', 'GAB1', 'VEPH1', 'FGD1', 'SWAP70', 'IRS2', 'ADAP2', 'CYTH1', 'ARAP2', 'TIAM1', 'FGD5', 'VAV2', 'AFAP1L1', 'PRKD1', 'MCF2L', 'FGD4', 'PLEKHH1', 'ITK']
C2:91:l	46	34	30	33	5.37013	19456	0.00810688	0.0174598	103	325	633	20	['UNC13C', 'SYT16', 'SYT1', 'SYTL1', 'SYTL2', 'SYT13', 'SYTL4', 'PLCD4', 'PLCD1', 'RASA1', 'PLCE1', 'PLCZ1', 'DYSF', 'MYOF', 'NEDD4L', 'SYT11', 'SYTL3', 'PLCH2', 'ESYT3', 'OTOF']
Pkinase:236:e	82	68	60	68	5.17367	19456	0.00838909	0.0180342	264	1221	1293	40	['SIK2', 'CDC42BPG', 'PRKACB', 'AURKB', 'DCLK2', 'STK11', 'CDK4', 'UHMK1', 'PRKCA', 'RPS6KA6', 'MAPK9', 'TNIK', 'MAP2K4', 'CDK20', 'SBK2', 'PDIK1L', 'PRKAA2', 'ULK1', 'RPS6KA4', 'PIM3', 'CDC7', 'TTK', 'RIPK3', 'STK32B', 'MAP2K2', 'PRKG2', 'RAGE', 'HIPK3', 'DYRK2', 'GSK3A', 'MOS', 'PRKCG', 'PRKD3', 'IKBKB', 'MYO3B', 'MAPK12', 'MARK1', 'CAMK1G', 'IRAK3', 'MYLK2']
RhoGAP:40:s	24	15	22	15	6.25378	19456	0.00849449	0.0182019	152	178	179	5	['SRGAP3', 'HMHA1', 'ARHGAP5', 'SYDE1', 'ARHGAP25']
FXa_inhibition:33:g	24	15	20	15	6.66078	19456	0.00849449	0.0182019	36	113	135	9	['CD248', 'MATN2', 'SCUBE2', 'TLL1', 'MATN3', 'LRP1B', 'SCUBE1', 'VLDLR', 'ASTN1']
p450:410:R	24	15	23	15	6.93024	19456	0.00849449	0.0182019	463	102	112	15	['CYP2C18', 'CYP27A1', 'CYP4X1', 'CYP2A13', 'CYP2C19', 'CYP2U1', 'CYP2C8', 'CYP11A1', 'CYP3A43', 'CYP17A1', 'CYP4F3', 'CYP19A1', 'CYP2J2', 'CYP3A4', 'CYP27C1']
Arm:38:N	24	15	24	15	5.64483	19456	0.00849449	0.0182019	41	131	273	8	['CTNNB1', 'KPNA4', 'KPNA2', 'KPNA3', 'KPNA5', 'ARVCF', 'APC2', 'ANKAR']
EF-hand_7:38:g	24	15	21	15	5.95623	19456	0.00849449	0.0182019	71	289	220	18	['EFCAB1', 'SLC25A23', 'CABP5', 'CALB2', 'MYL7', 'EFHB', 'PDCD6', 'CETN1', 'PPEF2', 'CAPSL', 'TNNC1', 'KCNIP3', 'GPD2', 'PPP3R1', 'PLS1', 'CALM3', 'HPCAL1', 'CHP']
Helicase_C:108:g	24	15	17	15	6.10824	19456	0.00849449	0.0182019	111	196	198	15	['CHD4', 'DDX31', 'DDX41', 'SHPRH', 'DDX4', 'ASCC3', 'ATRX', 'DHX36', 'DHX37', 'SKIV2L', 'HELQ', 'DDX42', 'SMARCA4', 'DHX58', 'SMARCAD1']
Lectin_C:103:p	30	20	29	20	6.28473	19456	0.00854521	0.0183022	108	165	219	12	['REG3G', 'PLA2R1', 'MRC2', 'CLEC5A', 'CLEC1A', 'CD69', 'KLRD1', 'CLEC3A', 'CLEC11A', 'ATRNL1', 'SFTPD', 'LY75']
fn3:52:p	130	115	103	109	4.6161	19456	0.00875113	0.0186488	85	419	3017	42	['FN1', 'IGSF22', 'IGDCC4', 'TTN', 'PTPRD', 'TNXB', 'TNR', 'COL20A1', 'NRCAM', 'PRTG', 'DSCAML1', 'EPHB1', 'TNN', 'TNC', 'IL31RA', 'LRRN4', 'DCC', 'IL27RA', 'PTPRU', 'COL7A1', 'KAL1', 'CDON', 'TIE1', 'USH2A', 'EPHA3', 'DSCAM', 'IGSF9', 'FNDC4', 'PTPRB', 'L1CAM', 'COL12A1', 'IL12RB2', 'SDK2', 'MYOM2', 'MYBPH', 'ROS1', 'FNDC1', 'SDK1', 'EPHA7', 'NFASC', 'MYBPC2', 'CNTN3']
Mito_carr:66:r	41	30	35	30	6.48228	19456	0.00892958	0.0189856	97	100	261	17	['SLC25A36', 'SLC25A25', 'SLC25A18', 'SLC25A23', 'SLC25A5', 'SLC25A2', 'SLC25A24', 'SLC25A32', 'SLC25A31', 'SLC25A47', 'SLC25A10', 'SLC25A41', 'SLC25A43', 'SLC25A28', 'UCP3', 'UCP2', 'MCART1']
PH:79:g	41	30	34	30	5.48228	19456	0.00892958	0.0189856	105	511	522	22	['RASGRF1', 'CYTH2', 'OSBPL5', 'AKAP13', 'ARHGAP24', 'ADAP2', 'PHLPP1', 'TRIO', 'SOS2', 'MCF2L', 'AFAP1', 'CIT', 'PLEK', 'ARAP2', 'VAV2', 'OSBP', 'ARHGAP15', 'ARHGEF18', 'PLEKHB1', 'MYO10', 'CADPS2', 'AKT2']
LRR_6:11:s	41	30	39	29	5.80974	19456	0.00892958	0.0189856	24	158	416	20	['NLRC5', 'NLRP5', 'NLRP9', 'FBXL6', 'FBXL7', 'NLRP8', 'RNH1', 'NLRP7', 'TCTE1', 'FBXL16', 'NLRP13', 'NLRP2', 'LRRC45', 'NLRP14', 'LRRC14', 'NLRP3', 'B7', 'LRRC23', 'LRRC42', 'LRRC71']
Spectrin:95:l	32	22	28	22	4.73267	19456	0.00901124	0.0191329	105	94	685	10	['SPTBN2', 'MCF2L', 'SYNE2', 'TRIO', 'MACF1', 'SPTB', 'SPTBN5', 'DST', 'UTRN', 'SPTAN1']
Plectin:19:e	32	22	5	21	6.17535	19456	0.00901124	0.0191329	41	20	252	1	['PLEC']
fn3:85:s	32	22	27	22	2.59373	19456	0.00901124	0.0191329	85	419	3017	19	['USH2A', 'SDK2', 'PRTG', 'CNTN5', 'FNDC1', 'TRIM42', 'MYOM3', 'FSD1', 'FNDC3B', 'PTPRD', 'TTN', 'PTPRF', 'CNTN6', 'ROBO2', 'EPHB3', 'TIE1', 'DSCAML1', 'ROBO3', 'IGFN1']
Cadherin:51:g	229	215	179	196	6.57926	19456	0.00904052	0.0191864	93	227	1363	72	['CDH8', 'PCDHA8', 'DCHS1', 'CDH22', 'PCDHGA6', 'PCDHA10', 'CDH17', 'PCDH8', 'PCDHB6', 'PCDHGB6', 'CELSR3', 'DSG3', 'PCDHB3', 'PCDHAC2', 'CDH20', 'FAT2', 'FAT4', 'PCDHB1', 'PCDHGA8', 'CDH9', 'DSG2', 'PCDHA4', 'FAT3', 'CDH2', 'FAT', 'CDH16', 'PCDHA5', 'PCDHG', 'PCDH9', 'CDHR1', 'PCDHGA5', 'PCDHB14', 'PCDHA1', 'PCDH10', 'PCDHB4', 'PCDHGA12', 'PCDHA11', 'PCDHB5', 'CDH7', 'PCDHGB7', 'PCDHA12', 'CDH12…
Pkinase:36:k	77	63	65	61	5.08291	19456	0.00905325	0.0192046	264	1221	1293	42	['ADRBK2', 'DAPK3', 'MAPKAPK3', 'MYO3A', 'RPS6KA6', 'GRK4', 'EIF2AK2', 'MAP2K1', 'SBK2', 'CAMK2G', 'MAP3K9', 'GSK3A', 'AURKB', 'AKT1', 'CSNK2A2', 'PRKACA', 'CSNK1G1', 'PHKG2', 'RPS6KA1', 'STK38', 'NEK6', 'CDK14', 'CDKL4', 'PRKD1', 'TRAD', 'MAP3K1', 'CIT', 'PSKH2', 'STK11', 'ADRBK1', 'PAK4', 'CDK17', 'LRRK1', 'MAP2K4', 'STK39', 'TTN', 'MAP2K7', 'GRK1', 'SNRK', 'CDK19', 'PIM2', 'PRKD2']
TSP_1:11:v	61	48	54	48	6.32182	19456	0.00909428	0.0192829	49	105	434	26	['THSD7B', 'SPON2', 'SEMA5A', 'ADAMTSL3', 'THBS2', 'ADAMTS13', 'ADAMTS8', 'C7', 'HMCN1', 'ADAMTS15', 'ADAMTS20', 'ADAMTS3', 'ADAMTS16', 'ADAMTS7', 'ADAMTS12', 'SEMA5B', 'ADAMTS1', 'ADAMTS18', 'THSD4', 'ADAMTSL1', 'THBS1', 'PAPLN', 'C9', 'ADAMTSL2', 'C8B', 'C8orf84']
Pkinase:25:k	84	70	58	70	5.20844	19456	0.00928008	0.0196679	264	1221	1293	37	['AKT3', 'TAOK3', 'PAK3', 'CAMKK1', 'STRADB', 'CSNK1A1', 'ULK1', 'MAP3K2', 'PRKCB', 'MARK4', 'SGK2', 'MAP3K3', 'CDC42BPB', 'HIPK4', 'BRSK2', 'PRKCI', 'MAPK14', 'PRKCQ', 'ACVR2A', 'CDK9', 'MAP3K6', 'MAP2K7', 'MAST1', 'MAPKAPK5', 'ROCK1', 'STK33', 'BRSK1', 'PRKCA', 'STK4', 'MAP3K9', 'GSK3B', 'CSNK1A1L', 'MARK1', 'STK32B', 'STK36', 'MAST2', 'EIF2AK1']
Spectrin:81:r	52	40	37	40	5.43311	19456	0.00929196	0.0196841	105	94	685	13	['SPTBN2', 'SPTB', 'ACTN2', 'SPTBN1', 'SPTAN1', 'SPTBN4', 'MACF1', 'SPTBN5', 'DST', 'UTRN', 'C14orf49', 'CCDC141', 'TRIO']
7tm_1:110:s	88	74	69	70	5.89267	19456	0.0095659	0.0202367	268	839	843	48	['DRD5', 'GPR152', 'OPRK1', 'GPR151', 'CXCR5', 'TAAR2', 'GPR6', 'RXFP2', 'ADORA1', 'TAAR6', 'SSTR2', 'EDNRB', 'APLNR', 'LPAR1', 'CCR7', 'GPR26', 'CXCR2', 'NMUR2', 'NPY1R', 'GPR37', 'ADRB3', 'LPAR3', 'P2RY11', 'GPR171', 'CHRM5', 'FFAR3', 'MTNR1A', 'CHRM3', 'F2RL3', 'MTNR1B', 'MCHR2', 'UTS2R', 'CNR2', 'GPR22', 'CHRM2', 'MRGPRX3', 'GPR39', 'HCRTR1', 'CCR8', 'OPN5', 'HTR1A', 'NPBWR2', 'CCRL1', 'HTR2A…
C2:62:e	50	38	35	38	5.49042	19456	0.00963265	0.0203502	103	325	633	22	['DYSF', 'OTOF', 'C2CD2', 'SYT16', 'TC2N', 'RIMS2', 'PRKCB', 'PIK3C2G', 'SYT4', 'RASAL1', 'SYTL1', 'UNC13C', 'SYT13', 'SYT12', 'BAIAP3', 'MYOF', 'CCDC33', 'SYTL2', 'ESYT2', 'SYT2', 'RGS3', 'HECW2']
TSP_1:31:g	50	38	44	38	6.03493	19456	0.00963265	0.0203502	49	105	434	20	['THSD7A', 'ADAMTS18', 'ADAMTS17', 'SEMA5B', 'THSD7B', 'ADAMTS6', 'ADAMTS20', 'C6', 'UNC5B', 'UNC5D', 'ADAMTS5', 'ADAMTS12', 'CFP', 'HMCN1', 'ADAMTS2', 'THBS1', 'ADAMTSL3', 'ADAMTS3', 'PAPLN', 'BAI2']
CH:91:g	26	17	17	17	5.77625	19456	0.00966221	0.0203941	109	187	270	12	['PLEC', 'IQGAP2', 'NAV2', 'LCP1', 'ACTN2', 'FLNB', 'FLNC', 'CLMN', 'ACTN1', 'MICAL1', 'ARHGEF6', 'CNN3']
Lectin_C:33:k	26	17	24	17	6.07828	19456	0.00966221	0.0203941	108	165	219	15	['COLEC12', 'CLEC4F', 'PLA2R1', 'SELL', 'KLRC3', 'KLRD1', 'LY75', 'CLEC5A', 'CLEC1A', 'CD69', 'REG3A', 'CLEC6A', 'CLEC4A', 'SELE', 'COLEC11']
Collagen:54:a	89	75	78	68	5.86515	19456	0.0100284	0.0211192	60	175	869	33	['COL17A1', 'C1QTNF9B', 'COL13A1', 'COL27A1', 'COL1A2', 'COL4A5', 'COL1A1', 'COL4A6', 'C1QB', 'COL3A1', 'COL15A1', 'COL11A1', 'COL25A1', 'COL24A1', 'COL9A3', 'MBL2', 'C1QTNF3', 'COL4A4', 'C1QTNF9', 'FCN2', 'COL28A1', 'COL20A1', 'COL22A1', 'COL9A1', 'COL6A2', 'COLEC12', 'COL23A1', 'COL7A1', 'COL5A2', 'COL2A1', 'COL5A1', 'COL4A3', 'COL6A1']
PDZ:26:k	40	29	22	29	5.02335	19456	0.0101027	0.0212564	82	388	700	14	['PDZRN4', 'MPDZ', 'MAGI1', 'GRIP1', 'MAGI2', 'DLG1', 'LNX1', 'DLG4', 'APBA1', 'DLG3', 'LRRC7', 'USH1C', 'SCRIB', 'FRMPD2']
PDZ:10:g	56	44	37	44	5.50877	19456	0.0105177	0.0220597	82	388	700	23	['PDZK1', 'USH1C', 'MAGI1', 'SDCBP2', 'MAGI3', 'DLG2', 'LIN7A', 'PDZD11', 'LNX1', 'GIPC1', 'PDLIM4', 'PDLIM1', 'PICK1', 'SYNPO2L', 'CNKSR2', 'MPDZ', 'SNTA1', 'AHNAK', 'LIN7C', 'PDZRN3', 'PARD6B', 'FRMPD2', 'DFNB31']
BTB:58:d	33	23	25	23	6.29616	19456	0.0105323	0.0220703	111	223	239	21	['BTBD11', 'KLHL32', 'IVNS1ABP', 'RHOBTB3', 'ZNF278', 'KBTBD12', 'SPOPL', 'KLHL4', 'ZBTB7A', 'KLHL12', 'BACH2', 'RCBTB2', 'KLHL6', 'PATZ1', 'RHOBTB1', 'BTBD6', 'KLHL7', 'RHOBTB2', 'KLHL36', 'ABTB1', 'KLHL8']
SH3_9:38:G	33	23	20	23	5.07549	19456	0.0105323	0.0220703	49	409	557	15	['NEBL', 'ARHGAP26', 'PSTPIP1', 'RUSC1', 'NOSTRIN', 'EFS', 'SH3KBP1', 'SNX18', 'PACSIN3', 'NCK2', 'SORBS3', 'MYO1F', 'SH3RF3', 'SH3RF1', 'RIMBP2']
hEGF:15:k	69	56	43	56	5.9058	19456	0.0106151	0.0222139	22	104	655	15	['NOTCH1', 'FBN3', 'CRB2', 'JAG1', 'DLL3', 'FBN2', 'CRB1', 'JAG2', 'NOTCH3', 'SLIT2', 'FAT4', 'SNED1', 'DLK2', 'NOTCH2', 'NOTCH4']
RRM_1:20:s	69	56	52	56	5.53323	19456	0.0106151	0.0222139	70	540	848	34	['PABPC5', 'CELF5', 'RBM5', 'HNRNPM', 'HNRNPA2B1', 'SF3B14', 'RBFOX1', 'SYNCRIP', 'SETD1A', 'MTHFSD', 'BOLL', 'HNRNPH1', 'RALY', 'SRSF6', 'ELAVL4', 'SNRPA', 'EIF3G', 'RBM4', 'HNRNPH2', 'RBMX2', 'EIF4B', 'CSTF2', 'RBM14', 'RBM45', 'CELF6', 'CIRBP', 'SRSF5', 'CELF3', 'RBM11', 'IGF2BP1', 'RBM19', 'SRSF4', 'ELAVL2', 'RBM10']
Ank_2:11:e	51	39	40	38	4.20851	19456	0.0106128	0.0222139	84	529	1570	26	['POTE2', 'FEM1A', 'ENSG00000188219', 'MYO16', 'PLA2G6', 'ESPNL', 'ANKRD50', 'ENSG00000254809', 'BCOR', 'TRPC3', 'TNKS', 'CDKN2D', 'ANKS6', 'ANKRD42', 'ENSG00000230031', 'PPP1R16B', 'POTEH', 'ANKRD36', 'TANC1', 'ANK2', 'ANKRD35', 'ANKRD33', 'ASB11', 'POTED', 'INVS', 'ASZ1']
Laminin_G_2:33:t	35	25	27	25	6.24849	19456	0.0108329	0.022636	126	111	262	11	['NRXN1', 'CNTNAP5', 'CNTNAP2', 'EGFLAM', 'CSPG4', 'CNTNAP1', 'PROS1', 'CNTNAP4', 'USH2A', 'LAMA5', 'LAMA2']
Hormone_recep:22:r	25	16	21	16	6.59681	19456	0.0109637	0.02281	208	153	147	12	['VDR', 'NR1I2', 'NR1I3', 'NR3C1', 'NR2F2', 'NR4A1', 'NR2F1', 'RORA', 'NR5A1', 'NR6A1', 'RORB', 'ESRRB']
Lectin_C:80:e	25	16	22	14	6.0217	19456	0.0109637	0.02281	108	165	219	15	['LY75', 'MRC2', 'MBL2', 'CLEC4D', 'CD209', 'REG1A', 'REG3G', 'SFTPD', 'SFTPA1', 'SFTPA2', 'CLEC11A', 'FREM1', 'CLEC4F', 'CLEC4E', 'THBD']
Filament:88:r	25	16	23	16	7.12406	19456	0.0109637	0.02281	312	104	102	13	['KRT80', 'LMNB2', 'KRT76', 'KRT38', 'KRT24', 'KRT20', 'BFSP2', 'KRT14', 'KRT15', 'KRT17', 'KRT19', 'KRT1', 'VIM']
Bromodomain:67:N	25	16	11	16	6.0217	19456	0.0109637	0.02281	84	143	219	4	['KAT2B', 'PBRM1', 'TAF1', 'BRPF3']
Trypsin:183:G	25	16	21	16	5.98913	19456	0.0109637	0.02281	221	210	224	19	['CELA1', 'TMPRSS3', 'TMPRSS2', 'ELANE', 'PRSS3', 'TMPRSS9', 'F2', 'PRSS33', 'TMPRSS11B', 'OVCH1', 'KLK11', 'F10', 'PRSS36', 'F9', 'ACR', 'TMPRSS15', 'TMPRSS11E', 'PRSS21', 'CELA3B']
TPR_8:29:e	25	16	21	16	4.87464	19456	0.0109637	0.02281	34	198	485	15	['IFIT2', 'TTC12', 'TTC21A', 'CDC27', 'STIP1', 'TTC7A', 'PEX5L', 'FKBP5', 'TMTC2', 'TOMM70A', 'IFIT1B', 'TTC6', 'SRP72', 'IFIT5', 'CTR9']
MFS_1:43:l	25	16	22	16	5.8307	19456	0.0109637	0.02281	353	229	250	9	['MFSD9', 'SLC17A8', 'SLC22A7', 'SLC16A8', 'SLC16A10', 'SLC22A18', 'SLC17A5', 'SPNS3', 'SLC16A5']
SRCR:24:d	25	16	17	16	5.71967	19456	0.0109637	0.02281	100	56	270	5	['DMBT1', 'CD163L1', 'LOXL2', 'CD163', 'SRCRB4D']
Laminin_EGF:28:G	43	32	40	32	6.09911	19456	0.0111009	0.023085	49	68	357	21	['LAMA1', 'USH2A', 'LAMA5', 'MEGF8', 'NTN1', 'LAMA3', 'CELSR1', 'LAMB2', 'LAMB4', 'NTNG2', 'MEGF11', 'CELSR2', 'CELSR3', 'LAMC2', 'EGFL4', 'LAMA2', 'NTN4', 'LAMC3', 'AGRN', 'LAMB1', 'MEGF10']
TSP_1:28:q	57	45	44	45	6.22397	19456	0.0113188	0.0235173	49	105	434	23	['ADAMTS20', 'SEMA5B', 'ADAMTSL3', 'UNC5C', 'THSD7A', 'ADAMTS3', 'THBS2', 'C6', 'BAI3', 'ADAMTS16', 'ADAMTS13', 'CFP', 'THSD7B', 'C8B', 'ADAMTS12', 'ADAMTS6', 'BAI2', 'ADAMTSL4', 'ADAMTS18', 'THSD4', 'ADAMTS4', 'ADAMTS7', 'THSD1']
Thioredoxin:80:k	21	13	19	13	7.11868	19456	0.0114316	0.0236249	104	60	86	9	['ERP44', 'TXNL1', 'PDIA4', 'TXNDC11', 'DNAJC10', 'PDIA6', 'TXNDC5', 'PDILT', 'PDIA2']
Y_phosphatase:167:e	21	13	12	13	6.00579	19456	0.0114316	0.0236249	235	152	186	7	['PTPRA', 'PTPRK', 'PTPRD', 'PTPRE', 'PTPN18', 'PTPN4', 'PTPRM']
SPRY:49:r	21	13	20	13	6.16991	19456	0.0114316	0.0236249	120	148	166	13	['BTN1A1', 'RYR2', 'BTN3A1', 'MID1', 'RANBP10', 'SPSB3', 'HNRNPU', 'BTNL9', 'HNRPU', 'TRIML2', 'RANBP9', 'RYR1', 'RFPL1']
UDPGT:306:q	21	13	4	13	7.99036	19456	0.0114316	0.0236249	499	41	47	11	['UGT1A1', 'UGT1A4', 'UGT1A7', 'UGT2B28', 'UGT1A3', 'UGT1A8', 'UGT1A6', 'UGT2A1', 'UGT1A10', 'UGT1A5', 'UGT1A9']
p450:432:n	21	13	21	13	6.73759	19456	0.0114316	0.0236249	463	102	112	11	['CYP4F2', 'CYP19A1', 'CYP4A22', 'CYP17A1', 'CYP4B1', 'CYP2C19', 'CYP4Z1', 'CYP1A1', 'CYP1A2', 'CYP4V2', 'CYP4X1']
TIG:10:s	21	13	15	13	6.3952	19456	0.0114316	0.0236249	85	80	142	8	['PKHD1', 'PLXNA2', 'PLXNA4', 'PKHD1L1', 'PLXNA1', 'PLXNA3', 'MET', 'PLXNB1']
UDPGT:442:r	21	13	21	13	7.99036	19456	0.0114316	0.0236249	499	41	47	9	['UGT2A3', 'UGT2B10', 'UGT2A1', 'UGT2B7', 'UGT3A2', 'UGT8', 'UGT2B15', 'UGT2B17', 'UGT2B4']
MFS_1:176:p	21	13	20	13	5.57916	19456	0.0114316	0.0236249	353	229	250	11	['MFSD1', 'SV2C', 'SLC18A2', 'MFSD9', 'SLC17A6', 'SLC16A9', 'MFSD4', 'SLC45A1', 'SLC17A7', 'SLC16A11', 'SLC22A3']
MFS_1:122:a	21	13	13	13	5.57916	19456	0.0114316	0.0236249	353	229	250	5	['MFSD10', 'C6orf192', 'SLC46A3', 'SLC16A7', 'SPNS1']
7tm_4:207:a	124	110	121	106	7.28028	19456	0.0114381	0.023628	280	469	454	97	['OR6N1', 'OR10Q1', 'OR4L1', 'OR2B2', 'OR2W3', 'OR4A15', 'OR13C2', 'OR9G4', 'OR1J2', 'OR9G1', 'OR2Z1', 'OR10AG1', 'OR2G2', 'OR4K13', 'OR8U1', 'OR8K5', 'OR2A12', 'OR10Z1', 'OR5H1', 'OR4D9', 'OR2C3', 'OR51B6', 'OR7E24', 'OR8B2', 'OR5AK2', 'OR6P1', 'OR51Q1', 'OR2L13', 'OR8J3', 'OR7G3', 'OR10H4', 'OR3A1', 'OR2L1P', 'OR2T12', 'OR5M8', 'OR8J1', 'OR10C1', 'OR5K1', 'OR56A4', 'OR14C36', 'OR2T34', 'OR2L3',…
C2:12:n	60	48	37	46	5.75346	19456	0.0115938	0.0239389	103	325	633	27	['PRKCB', 'PLCH1', 'MYOF', 'SYT10', 'SYT13', 'SYT3', 'PRKCA', 'RAB11FIP2', 'SYTL3', 'RIMS2', 'SYTL5', 'NEDD4L', 'PRF1', 'SYT4', 'CPNE9', 'PLCL1', 'C2CD3', 'OTOF', 'ITSN1', 'MCTP2', 'UNC13C', 'TC2N', 'SYT14', 'BCR', 'ESYT3', 'HECW2', 'RPH3A']
Pkinase:127:e	77	64	57	62	5.08291	19456	0.0117055	0.0241267	264	1221	1293	46	['NEK10', 'BMPR2', 'GRK4', 'AURKC', 'SIK2', 'RIPK4', 'ROCK1', 'TSSK2', 'CLK3', 'CSNK1A1', 'MAP3K2', 'PAK3', 'PRKACG', 'NEK4', 'DAPK3', 'ADRBK2', 'MAP3K4', 'DYRK1A', 'CLK1', 'MAP3K15', 'CAMKV', 'CHEK1', 'PHKG2', 'MAPKAPK2', 'PRKCB', 'CAMK2A', 'STK3', 'GRK1', 'HUNK', 'MST4', 'NUAK1', 'CDK8', 'TRAD', 'MAP2K4', 'CDK13', 'DYRK2', 'CLK2', 'STK33', 'STK24', 'MGC42105', 'DCLK3', 'CHEK2', 'CAMK1D', 'DCLK2…
I-set:59:t	225	212	169	190	5.07463	19456	0.0117333	0.0241732	90	839	3800	48	['TTN', 'NTM', 'NRG1', 'MYBPC1', 'ROBO2', 'ROBO1', 'IGSF10', 'ROR2', 'NCAM2', 'PTPRK', 'CNTN4', 'PTPRD', 'CNTN5', 'OPCML', 'CDON', 'NTRK3', 'MFAP3L', 'HSPG2', 'MYOM2', 'MDGA2', 'HMCN1', 'KIRREL2', 'SDK2', 'NRG2', 'CNTN3', 'OBSL1', 'FGFR2', 'DSCAML1', 'PTK7', 'L1CAM', 'CHL1', 'NEXN', 'MYBPC3', 'GPR125', 'DCC', 'ROR1', 'SIGLEC1', 'IGDCC3', 'CNTN6', 'IGFN1', 'SDK1', 'DSCAM', 'WFIKKN2', 'LSAMP', 'VCA…
VWA:82:g	27	18	23	18	5.95332	19456	0.0117494	0.0241958	175	144	248	14	['COL28A1', 'COL21A1', 'COL6A6', 'COL6A3', 'ITGA1', 'ITGA11', 'VWA2', 'VIT', 'COL20A1', 'MATN1', 'COCH', 'PARP4', 'MATN2', 'ITGAM']
fn3:17:t	139	125	113	120	4.71267	19456	0.0118614	0.0243941	85	419	3017	43	['TRIM36', 'TTN', 'IGDCC4', 'COL7A1', 'COL20A1', 'NRCAM', 'MYBPC1', 'BOC', 'PTPRH', 'EPHA2', 'CHL1', 'COL14A1', 'MYBPC3', 'TNXB', 'MYBPH', 'EPHA3', 'PTPRD', 'ROBO1', 'IGDCC3', 'SDK2', 'COL12A1', 'IGFN1', 'USH2A', 'EPHA7', 'L1CAM', 'DSCAM', 'FNDC3A', 'PTPRK', 'MPL', 'CNTN1', 'ROBO2', 'TNC', 'DCC', 'EGFLAM', 'MYOM2', 'SDK1', 'SORL1', 'OSMR', 'IL31RA', 'PTPRF', 'OBSCN', 'TNN', 'TIE1']
PH:45:k	55	43	46	42	5.90608	19456	0.011957	0.0245572	105	511	522	26	['OSBP', 'SH2B3', 'COL4A3BP', 'DNM2', 'ARHGAP25', 'AFAP1', 'VEPH1', 'CIT', 'ITK', 'MCF2L', 'AKT1', 'FGD4', 'GAB3', 'RASA1', 'RTKN2', 'PREX2', 'CYTH2', 'OSBP2', 'ARAP2', 'GRB14', 'FGD2', 'ARHGAP10', 'FGD1', 'ARHGEF7', 'PLEKHH1', 'PLEKHA7']
Homeobox:8:t	46	35	40	35	5.96195	19456	0.0119619	0.0245572	57	381	420	30	['ZHX1', 'NKX2-2', 'ALX1', 'BARHL2', 'NKX3-2', 'NOBOX', 'RHOXF1', 'DLX5', 'PHOX2B', 'SATB1', 'NKX2-1', 'HOXB4', 'PITX2', 'DMBX1', 'POU6F2', 'LMX1A', 'ZFHX4', 'EN1', 'LHX6', 'HOXD4', 'POU5F1', 'HOXD9', 'POU3F4', 'POU4F3', 'HOXC12', 'OTX1', 'TLX2', 'PDX1', 'VAX2', 'ONECUT1']
CUB:69:s	55	43	40	43	6.39483	19456	0.011957	0.0245572	110	128	372	11	['CSMD3', 'CDCP2', 'LRP3', 'CUBN', 'CSMD2', 'NRP1', 'TLL2', 'TLL1', 'NETO1', 'PDGFD', 'DMBT1']
Pkinase_Tyr:181:k	55	43	37	43	4.63021	19456	0.011957	0.0245572	260	1213	1264	28	['NTRK1', 'FGFR1', 'ERBB2', 'PTK2', 'ACVRL1', 'JAK3', 'ACVR1C', 'EPHB3', 'ROR2', 'NTRK2', 'LYN', 'FGFR3', 'CSK', 'PDGFRB', 'LCK', 'NTRK3', 'TYK2', 'EPHB1', 'EPHA7', 'INSR', 'FGFR4', 'ROS1', 'SRMS', 'EPHA2', 'EPHA5', 'TNK2', 'EGFR', 'NPR1']
P53:71:k	58	46	13	45	9.96622	19456	0.0121836	0.0249793	196	33	33	1	['TP53']
Pkinase_Tyr:182:k	36	26	24	26	4.01877	19456	0.012279	0.0251306	260	1213	1264	15	['FER', 'BMPR1B', 'NTRK3', 'ACVRL1', 'TEK', 'EPHA2', 'EPHA7', 'DDR2', 'ROR2', 'RIPK2', 'KIT', 'EPHB1', 'JAK1', 'FLT4', 'JAK2']
7tm_1:191:s	36	26	31	26	4.60317	19456	0.012279	0.0251306	268	839	843	21	['GPR161', 'NPY5R', 'CCKBR', 'NPY1R', 'AVPR2', 'CHRM2', 'HRH1', 'HTR4', 'QRFPR', 'GPR75', 'HTR5A', 'HTR7', 'HTR6', 'PTGDR', 'DRD5', 'DRD2', 'AVPR1B', 'TACR2', 'TAAR8', 'MLNR', 'MCHR2']
Pkinase:150:s	78	65	50	64	5.10153	19456	0.0123292	0.0252222	264	1221	1293	37	['PNCK', 'MARK1', 'GRK5', 'ACVR1B', 'LATS1', 'STK3', 'RPS6KA2', 'UHMK1', 'CDC42BPB', 'IKBKB', 'DCLK1', 'TNIK', 'NEK11', 'CSNK1D', 'RPS6KA4', 'MAPK8', 'PRKCB', 'LRRK2', 'NUAK2', 'CSNK1G2', 'TAOK1', 'TSSK1B', 'HIPK2', 'CAMK2D', 'STK11', 'MAPK1', 'STK4', 'PIK3R4', 'CAMKV', 'WNK3', 'RPS6KA6', 'STK24', 'ROCK1', 'CASK', 'CHEK2', 'BRSK1', 'MOS']
Ig_3:39:g	127	113	88	107	4.77445	19456	0.0125059	0.0255389	79	936	2641	46	['CNTN2', 'CNTN5', 'L1CAM', 'PRTG', 'CNTN4', 'SDK2', 'HEPACAM2', 'AXL', 'SDK1', 'HMCN1', 'PSG1', 'ROBO1', 'CNTN3', 'FCRL6', 'FSTL5', 'IGSF9', 'PTPRD', 'NPHS1', 'PSG4', 'IGDCC3', 'ROBO2', 'NFASC', 'IL1RAP', 'CADM2', 'CHL1', 'VSIG1', 'IGDCC4', 'JAM3', 'MCAM', 'FSTL4', 'PXDNL', 'FLT1', 'SIGLEC11', 'IGSF10', 'DSCAM', 'PDGFRB', 'PSG5', 'HSPG2', 'CNTN1', 'CADM1', 'MALT1', 'MUSK', 'PSG2', 'JAM2', 'CEACA…
Pkinase:93:g	75	62	63	62	5.04494	19456	0.0125682	0.0256322	264	1221	1293	46	['CDK20', 'CLK3', 'CSNK1G1', 'ADRBK2', 'NEK9', 'EIF2AK2', 'TTBK1', 'SGK2', 'STK38', 'ERN1', 'CIT', 'PRKG1', 'TSSK1B', 'TRIO', 'GAK', 'STK32B', 'HIPK2', 'TSSK3', 'MGC42105', 'ACVR2A', 'MAPKAPK5', 'MARK1', 'STK17A', 'PRKCQ', 'PAK7', 'STK38L', 'LATS2', 'PSKH2', 'CAMK4', 'BRSK2', 'STK32C', 'MASTL', 'STK35', 'CSNK1G2', 'RNASEL', 'CSNK1D', 'MAPK6', 'CSNK1E', 'WEE2', 'BUB1B', 'CSNK1A1L', 'PRKCE', 'CAMK2…
Pkinase:177:k	75	62	53	60	5.04494	19456	0.0125682	0.0256322	264	1221	1293	43	['OXSR1', 'AKT2', 'MAPK10', 'VRK3', 'CSNK1A1', 'ACVR2B', 'CSNK1G1', 'NEK4', 'STK32A', 'CAMK4', 'MAP2K5', 'DCLK1', 'PIM2', 'CDC42BPA', 'PRKACA', 'PRKG2', 'RPS6KA2', 'PRKG1', 'PIM3', 'MYO3B', 'TAOK2', 'PAK7', 'CDK6', 'CAMKV', 'AMHR2', 'BMPR2', 'SNRK', 'TAOK3', 'ERN1', 'SRPK3', 'VRK2', 'DMPK', 'ROCK1', 'MAP2K4', 'TNIK', 'STK32C', 'MAP2K7', 'TSSK1B', 'PHKG1', 'SBK1', 'CDKL4', 'MASTL', 'STK33']
Pkinase:54:k	75	62	53	61	5.04494	19456	0.0125682	0.0256322	264	1221	1293	41	['TRIB3', 'MKNK2', 'SGK1', 'PAK2', 'LATS2', 'CDK14', 'TLK1', 'C9orf96', 'MARK2', 'PAK3', 'MYO3B', 'RPS6KA2', 'RPS6KA6', 'PHKG1', 'STK36', 'MAPK3', 'SIK1', 'CIT', 'ACVR1B', 'MAPKAPK3', 'DMPK', 'PSKH1', 'LRRK1', 'PAK7', 'GRK4', 'PRKD3', 'OXSR1', 'GRK5', 'AMHR2', 'SIK2', 'DCLK2', 'TLK2', 'STK38', 'LATS1', 'TSSK3', 'TAOK3', 'MAP2K4', 'SBK2', 'WNK2', 'MAPK4', 'MAPK1']
HLH:45:e	29	20	29	20	6.24243	19456	0.0125947	0.0256751	55	218	218	17	['NEUROD1', 'HAND2', 'NEUROD4', 'SIM2', 'PTF1A', 'HAND1', 'MXD3', 'MXI1', 'NEUROD6', 'ASCL1', 'USF1', 'ATOH7', 'LYL1', 'FERD3L', 'TAL2', 'SREBF1', 'TCF21']
Pkinase:193:g	79	66	51	64	5.1199	19456	0.0129909	0.0263573	264	1221	1293	43	['PRKCQ', 'TTK', 'STK25', 'STRADB', 'RPS6KA1', 'CDK9', 'TSSK1B', 'DYRK1A', 'TRIB1', 'NLK', 'CDK20', 'HUNK', 'WNK2', 'WNK3', 'ACVR2A', 'IRAK2', 'NUAK1', 'CAMK1', 'PRKG1', 'TRIB2', 'STK32A', 'TTBK1', 'STK17B', 'ENSG00000168038', 'LATS1', 'MAPK14', 'MAP2K7', 'YSK4', 'PRKCZ', 'CAMK2D', 'PLK1', 'TSSK2', 'MAP2K4', 'CSNK1E', 'MYLK2', 'EIF2AK4', 'TNIK', 'PRKD1', 'GRK5', 'AKT1', 'IRAK3', 'TAOK3', 'MAPKAPK…
Nebulin:25:E	59	47	27	45	6.29381	19456	0.0131146	0.0265033	29	13	428	4	['NEB', 'NRAP', 'NEBL', 'LASP1']
zf-C2H2_6:15:q	207	194	160	175	5.54634	19456	0.0131043	0.0265033	27	782	2521	92	['ZNF678', 'ZNF669', 'ZNF816', 'ZNF43', 'ZNF273', 'ZNF551', 'ZNF571', 'ZNF763', 'ZNF345', 'ZNF572', 'ZFP62', 'ZNF574', 'ZNF85', 'ZNF737', 'SNAI2', 'ZSCAN5B', 'ZNF546', 'ZSCAN10', 'ZNF808', 'ZNF573', 'ZNF48', 'ZNF606', 'ZNF676', 'ZBTB47', 'ZNF701', 'ZSCAN2', 'ZNF12', 'ZNF780A', 'ZNF607', 'ZNF77', 'ZNF480', 'ZNF493', 'ZFP37', 'ZNF425', 'ZNF660', 'ZNF668', 'ZNF93', 'ZNF195', 'ZNF567', 'ZNF500', 'ZNF…
7tm_1:106:v	59	47	43	47	5.31588	19456	0.0131146	0.0265033	268	839	843	26	['FPR1', 'GPR31', 'CHRM2', 'OPRM1', 'NMUR2', 'TAAR6', 'P2RY2', 'OPN4', 'GPR132', 'GPR174', 'NPY2R', 'NPSR1', 'CCR9', 'SSTR4', 'LPAR5', 'NPY1R', 'CXCR6', 'RRH', 'TAAR1', 'MC4R', 'CHRM1', 'LPAR4', 'P2RY6', 'GPR35', 'GPR52', 'GPR146']
CUB:103:k	47	36	34	36	6.16806	19456	0.0131083	0.0265033	110	128	372	17	['SEZ6L', 'CSMD3', 'CDCP2', 'TLL2', 'DCBLD1', 'EGFL4', 'CSMD2', 'MASP1', 'LRP12', 'NRP1', 'TLL1', 'ST14', 'CUZD1', 'CUBN', 'NETO1', 'TMPRSS15', 'PDGFD']
CUB:102:s	47	36	31	36	6.16806	19456	0.0131083	0.0265033	110	128	372	10	['PCOLCE', 'CSMD2', 'CSMD3', 'MASP1', 'OVCH1', 'CUBN', 'CDCP2', 'C1S', 'NETO2', 'TLL2']
Pkinase:110:g	65	53	52	49	4.83849	19456	0.0132658	0.026785	264	1221	1293	45	['SIK2', 'CDK10', 'GRK1', 'STK32C', 'PRKCG', 'CSNK1D', 'CDK18', 'TTBK1', 'SGK2', 'HIPK3', 'DYRK3', 'MAPK4', 'STK3', 'CDK15', 'NEK2', 'NLK', 'PRKCB', 'C9orf96', 'CAMK1D', 'WNK3', 'MYLK4', 'DCLK3', 'MAP4K3', 'DMPK', 'MAPK1', 'RPS6KC1', 'PSKH2', 'GAK', 'MAP3K1', 'CDC7', 'PKN3', 'MYO3A', 'PAK7', 'TSSK4', 'CAMK2A', 'C14orf20', 'BMPR2', 'IRAK2', 'ULK1', 'ERN2', 'PRKD1', 'TLK2', 'CAMK2B', 'MAP2K7', 'SCY…
PDZ:2:v	23	15	11	15	4.22498	19456	0.0134493	0.0270848	82	388	700	7	['DLG1', 'MAGI1', 'GRIP1', 'SYNJ2BP', 'SNTG2', 'RIMS1', 'MPDZ']
Filamin:35:e	23	15	14	15	5.42826	19456	0.0134493	0.0270848	103	28	304	3	['FLNA', 'FLNC', 'FLNB']
DEAD:120:s	23	15	20	15	6.65382	19456	0.0134493	0.0270848	176	128	130	11	['DDX23', 'DDX56', 'DDX3X', 'HFM1', 'DHX33', 'RECQL', 'DHX16', 'DHX9', 'DDX47', 'DDX31', 'DDX46']
Filament:3:k	23	15	22	15	7.00377	19456	0.0134493	0.0270848	312	104	102	18	['KRT2', 'KRT75', 'GFAP', 'KRT4', 'KRT79', 'KRT9', 'KRT18', 'KRT16', 'KRT28', 'KRT77', 'LMNB1', 'KRT23', 'KRT15', 'KRT78', 'KRT73', 'KRT76', 'KRT36', 'KRT72']
SH3_2:34:g	23	15	13	15	4.35878	19456	0.0134493	0.0270848	55	488	638	9	['ITSN2', 'SH3BP4', 'MIA3', 'VAV2', 'SH3GL3', 'SORBS1', 'MIA2', 'DLG1', 'SASH3']
V-set:22:s	50	39	39	39	5.66206	19456	0.0137388	0.0276202	109	958	562	30	['PVRL3', 'HAPLN4', 'CEACAM7', 'IGSF3', 'CTLA4', 'VSIG10', 'PSG3', 'CD80', 'BTN3A1', 'TIMD4', 'FAIM3', 'PSG4', 'MPZL3', 'CD300LG', 'SCN1B', 'CD2', 'PSG2', 'SCN3B', 'VSTM2L', 'CD276', 'SIGLEC7', 'CD226', 'VSIG8', 'CD83', 'CD7', 'SLAMF6', 'BTN3A2', 'HAVCR2', 'BTNL3', 'BTNL2']
ig:74:v	39	29	30	28	3.36523	19456	0.0137916	0.0276904	87	1005	2154	15	['BTLA', 'NFASC', 'VSIG10', 'NTRK3', 'FCRL4', 'VCAM1', 'KIR3DL1', 'CD79A', 'LILRB4', 'FCRL3', 'SIGLEC6', 'AMIGO2', 'LILRB5', 'KIR2DL3', 'KIT']
PDZ:62:s	39	29	19	29	4.98682	19456	0.0137916	0.0276904	82	388	700	15	['GRIP1', 'PDLIM7', 'TJP1', 'PCLO', 'PDLIM1', 'DLG2', 'TJP2', 'MPDZ', 'MAGI1', 'SHANK1', 'ARHGEF12', 'PICK1', 'SHROOM3', 'PDZD7', 'GIPC2']
Ldl_recept_a:23:d	39	29	39	29	6.19963	19456	0.0137916	0.0276904	37	82	302	13	['LRP1B', 'LRP6', 'C8A', 'LRP1', 'LRP2', 'C8B', 'LRP4', 'SORL1', 'LDLR', 'SPINT1', 'CD320', 'TMPRSS7', 'CORIN']
Ldl_recept_b:31:d	28	19	28	19	6.55059	19456	0.0141988	0.0283488	42	28	170	9	['LRP4', 'LRP1B', 'EGF', 'NID1', 'LRP1', 'LRP5', 'LRP2', 'VLDLR', 'SORL1']
Laminin_G_2:121:l	28	19	21	19	5.92656	19456	0.0141988	0.0283488	126	111	262	9	['CNTNAP1', 'CNTNAP5', 'CNTNAP2', 'EGFLAM', 'LAMA2', 'NRXN1', 'CNTNAP3', 'FAT4', 'CNTNAP4']
zf-C4:28:k	28	19	20	19	6.71206	19456	0.0141988	0.0283488	70	152	152	15	['ESRRG', 'RARG', 'NR1D1', 'THRA', 'PPARG', 'RORB', 'NR1D2', 'NR1I2', 'HNF4A', 'Q8N8C9', 'NR1H2', 'NR2C2', 'NR1H3', 'RORC', 'PPARD']
ABC_tran:33:g	28	19	23	19	6.35265	19456	0.0141988	0.0283488	137	141	195	14	['ABCC5', 'ABCC9', 'ABCC1', 'ABCB4', 'ABCA6', 'ABCB11', 'ABCC8', 'ABCC6', 'ABCD4', 'ABCG1', 'ABCA5', 'CFTR', 'ABCC12', 'ABCB1']
Cadherin_2:81:l	28	19	17	19	6.9713	19456	0.0141988	0.0283488	83	178	127	10	['PCDHGB1', 'PCDHGA11', 'PCDHA1', 'PCDHA11', 'PCDHA5', 'PCDHGC4', 'PCDHB10', 'PCDHGA7', 'PCDHA13', 'PCDHGB2']
cEGF:23:D	28	19	23	19	5.92107	19456	0.0141988	0.0283488	24	136	263	10	['CD93', 'FBN1', 'MATN2', 'LTBP1', 'FBN2', 'HMCN1', 'EMR1', 'LRP2', 'FBLN5', 'SCUBE3']
Laminin_EGF:40:g	48	37	46	37	6.25781	19456	0.0143572	0.0286528	49	68	357	14	['LAMA2', 'LAMA5', 'LAMC1', 'LAMC3', 'USH2A', 'LAMB4', 'LAMB1', 'LAMA1', 'MEGF11', 'NTN4', 'LAMC2', 'PEAR1', 'HSPG2', 'LAMB2']
I-set:17:s	177	164	140	149	4.72845	19456	0.0143757	0.0286775	90	839	3800	52	['DSCAML1', 'MYOM2', 'CNTN1', 'IGSF22', 'CNTN2', 'HMCN1', 'TTN', 'ROR2', 'FLT1', 'PXDNL', 'SDK1', 'MYPN', 'MYBPC2', 'ADAMTSL3', 'UNC5B', 'OBSCN', 'DSCAM', 'HSPG2', 'MYBPC1', 'PAPLN', 'CNTN4', 'LINGO1', 'PTK7', 'ROBO2', 'LRRC4C', 'UNC5C', 'CNTN6', 'CNTN5', 'MYBPH', 'KIRREL2', 'OPCML', 'NEGR1', 'IL1RL1', 'BOC', 'MYOM3', 'MUSK', 'ROBO1', 'IGFN1', 'NRCAM', 'NCAM2', 'NTRK2', 'ALPK2', 'DCC', 'LRFN2', '…
ABC_tran:9:k	30	21	27	21	6.45219	19456	0.0146331	0.0291285	137	141	195	13	['ABCF2', 'ABCA4', 'CFTR', 'ABCC10', 'ABCB10', 'ABCC6', 'TAP1', 'ABCB1', 'ABCC8', 'ABCB9', 'ABCB4', 'ABCB11', 'ABCC12']
SRCR:74:a	30	21	25	21	5.9827	19456	0.0146331	0.0291285	100	56	270	6	['CD163L1', 'CD5L', 'DMBT1', 'LOXL4', 'SCARA5', 'CD163']
EF-hand_7:42:t	30	21	25	21	6.27816	19456	0.0146331	0.0291285	71	289	220	13	['CALML4', 'PLS3', 'SDF4', 'CALML3', 'CABP5', 'NINL', 'CAPSL', 'LCP1', 'CALML5', 'PPP2R3B', 'GPD2', 'HPCAL4', 'CIB2']
Cadherin_2:32:a	30	21	23	21	7.07084	19456	0.0146331	0.0291285	83	178	127	13	['PCDH11Y', 'PCDHGA12', 'PCDHA4', 'PCDHGB3', 'PCDHB12', 'PCDHA8', 'PCDHB3', 'PCDHA2', 'PCDHA6', 'PCDHAC1', 'PCDHGA6', 'PCDHB6', 'PCDHB15']
RhoGEF:46:e	22	14	17	14	5.93258	19456	0.0147969	0.0294042	181	200	205	14	['FGD6', 'ARHGEF2', 'MCF2L', 'PLEKHG3', 'FGD2', 'PREX1', 'TIAM1', 'AKAP13', 'MCF2', 'ARHGEF9', 'ARHGEF17', 'PLEKHG5', 'ECT2', 'RASGRF2']
Y_phosphatase:37:g	22	14	10	14	6.0729	19456	0.0147969	0.0294042	235	152	186	5	['PTPRD', 'PTPRO', 'PTPRZ1', 'PTPRG', 'PTPN18']
Laminin_G_2:104:p	22	14	16	14	5.57864	19456	0.0147969	0.0294042	126	111	262	9	['CSPG4', 'CNTNAP2', 'PROS1', 'LAMA2', 'NRXN1', 'LAMA3', 'SLIT3', 'NRXN2', 'CELSR3']
PDZ:7:e	51	40	28	40	5.37384	19456	0.0148612	0.0295068	82	388	700	19	['SDCBP2', 'RHPN1', 'FRMPD2', 'PDZD4', 'MPP7', 'MAGI1', 'LNX2', 'MPDZ', 'MAGI3', 'DLG2', 'INADL', 'APBA1', 'SNTG2', 'TJP1', 'MYO18A', 'MAGI2', 'NOS1', 'PCLO', 'LIN7C']
Pkinase:30:K	67	55	55	55	4.88221	19456	0.0149076	0.0295862	264	1221	1293	22	['NEK1', 'DYRK1A', 'MAPKAPK2', 'MAPK6', 'ACVR1B', 'PRKD1', 'IRAK2', 'PRKG1', 'RIPK4', 'DYRK3', 'YSK4', 'STK10', 'GRK6', 'BMPR2', 'SLK', 'CDK7', 'ROCK2', 'PRKCE', 'BUB1', 'TGFBR1', 'MST4', 'PRKCI']
Trypsin:96:e	40	30	21	30	6.6672	19456	0.0152763	0.0302799	221	210	224	14	['PRSS3', 'PRSS36', 'KLK6', 'KLK11', 'PRSS58', 'TMPRSS5', 'F9', 'PROZ', 'AZU1', 'PRTN3', 'TMPRSS12', 'GZMA', 'PRSS38', 'PRSS55']
C2:65:L	54	43	34	43	5.60146	19456	0.0152767	0.0302799	103	325	633	16	['DYSF', 'RAB11FIP2', 'RPH3A', 'UNC13C', 'ESYT2', 'SYTL2', 'OTOF', 'PRKCE', 'WWP1', 'RIMS1', 'CCDC33', 'RIMS2', 'PRF1', 'CEP120', 'TOLLIP', 'TC2N']
Pkinase:98:e	71	59	50	59	4.96587	19456	0.0155712	0.0308244	264	1221	1293	38	['MAP2K4', 'RPS6KA3', 'CAMKK2', 'PRKD2', 'PIM1', 'RPS6KA2', 'AKT1', 'BMPR2', 'RPS6KA1', 'TRIB2', 'CAMK4', 'BUB1B', 'CDK5', 'CAMKV', 'NUAK2', 'PRKD3', 'CDK19', 'DAPK1', 'RIPK3', 'MAPKAPK2', 'CAMK1D', 'TTK', 'STK31', 'MELK', 'PINK1', 'IRAK1', 'MAPK13', 'TSSK1B', 'STK11', 'GSK3B', 'BMP2K', 'SCYL3', 'GRK1', 'DYRK3', 'RPS6KA6', 'MAP3K15', 'LRRK2', 'MAP3K1']
LRR_6:6:t	38	28	34	28	5.70012	19456	0.0156948	0.0310163	24	158	416	17	['FBXL7', 'LRRC45', 'NLRP4', 'NLRX1', 'TLR4', 'NLRP14', 'TCTE1', 'AMN1', 'NLRP3', 'NLRC5', 'FBXL6', 'RLTPR', 'NLRP2', 'FBXL5', 'C14orf166B', 'FBXL13', 'FBXL14']
BTB:12:D	38	28	32	28	6.49969	19456	0.0156948	0.0310163	111	223	239	21	['SPOP', 'KLHL5', 'KLHL2', 'ZBTB10', 'KLHL1', 'ZBTB16', 'BACH2', 'ZBTB34', 'KLHL4', 'KLHL14', 'BCL6B', 'GMCL1', 'KLHL6', 'IVNS1ABP', 'IBTK', 'ANKFY1', 'KLHL25', 'ABTB1', 'ZBTB49', 'SPOPL', 'KLHL15']
Laminin_G_2:57:s	38	28	31	28	6.36713	19456	0.0156948	0.0310163	126	111	262	12	['LAMA2', 'CRB1', 'NRXN2', 'USH2A', 'CNTNAP2', 'CNTNAP1', 'EGFLAM', 'LAMA3', 'NRXN1', 'SLIT3', 'FAT4', 'SLIT1']
Cadherin:26:g	192	180	132	164	6.32502	19456	0.0157359	0.0310843	93	227	1363	64	['PCDHG', 'DSC2', 'DSG4', 'PCDH12', 'PCDHA8', 'PCDH11Y', 'PCDHB4', 'CDH10', 'PCDHGB6', 'PCDHB5', 'FAT4', 'PCDHB7', 'CDH3', 'PCDHA4', 'DSC1', 'PCDHA5', 'PCDHB13', 'PCDHB3', 'PCDH11X', 'PCDHA10', 'RET', 'FAT', 'PCDHB1', 'PCDHB14', 'PCDHB10', 'PCDH10', 'PCDHGA8', 'PCDHGA1', 'PCDH19', 'FAT2', 'CDH24', 'PCDHAC2', 'PCDHA2', 'CDH18', 'PCDHA12', 'PCDH18', 'FAT3', 'PCDHB12', 'DCHS1', 'PCDHGC3', 'CDH6', 'C…
V-set:85:s	52	41	36	40	5.71864	19456	0.0160724	0.0317086	109	958	562	22	['CXADR', 'MOG', 'CD80', 'PVRL3', 'CEACAM4', 'CEACAM1', 'Q5JXA8', 'VPREB1', 'PSG1', 'IGSF3', 'SIRPB1', 'VSTM2L', 'LY6G6F', 'PIGR', 'ICOSLG', 'TREML4', 'CEACAM21', 'CLMP', 'SIGLEC6', 'BTNL2', 'HHLA2', 'BTNL3']
7tm_2:33:r	24	16	18	16	6.63956	19456	0.0162931	0.0320082	245	136	137	11	['BAI3', 'CRHR2', 'ADCYAP1R1', 'GPR112', 'EMR2', 'GPR124', 'SCTR', 'LPHN3', 'ELTD1', 'GPR98', 'GPR115']
7tm_1:188:a	24	16	23	16	4.0182	19456	0.0162931	0.0320082	268	839	843	16	['CHRM1', 'CHRM4', 'GPR101', 'HTR4', 'HTR5A', 'ADRA1D', 'ADRA2C', 'CCKAR', 'HCRTR2', 'OPN3', 'HRH4', 'HRH1', 'GPR21', 'PTGDR', 'PTGER1', 'GPR39']
MFS_1:232:l	24	16	24	16	5.77181	19456	0.0162931	0.0320082	353	229	250	6	['HIAT1', 'SLC16A7', 'SV2A', 'HIATL1', 'SLC18A3', 'SLC37A1']
ANF_receptor:92:r	24	16	21	16	7.2298	19456	0.0162931	0.0320082	352	92	91	8	['GRIN2A', 'GRIK5', 'GPRC6A', 'GRM5', 'GRID1', 'GRM3', 'GRM7', 'GRIK2']
Neur_chan_LBD:64:w	24	16	17	16	7.2298	19456	0.0162931	0.0320082	216	88	91	9	['GABRB3', 'CHRNA2', 'CHRND', 'CHRNA5', 'CHRNA7', 'CHRNA4', 'HTR3B', 'GLRB', 'GABRB2']
ANF_receptor:135:g	24	16	17	16	7.2298	19456	0.0162931	0.0320082	352	92	91	11	['GRM7', 'GABBR1', 'GRIK5', 'GRIK2', 'GRIK1', 'GRIA2', 'GRM3', 'GRIN1', 'GRM1', 'GRID2', 'GUCY2F']
TPR_8:19:e	24	16	24	16	4.81575	19456	0.0162931	0.0320082	34	198	485	14	['TTC7A', 'TMTC1', 'TMTC3', 'DNAJC7', 'ZC3H7B', 'IFIT1B', 'TTC7B', 'TTC28', 'RPAP3', 'BBS4', 'GTF3C3', 'GPSM2', 'PEX5L', 'STIP1']
EGF_CA:35:n	72	60	57	58	5.55603	19456	0.0164203	0.0322174	42	189	871	21	['FBN2', 'THBS3', 'NELL2', 'MATN2', 'FBN3', 'EMR1', 'FBN1', 'NOTCH4', 'NOTCH2', 'LTBP1', 'MEGF8', 'FBLN7', 'CUBN', 'LTBP2', 'CCBE1', 'NELL1', 'TLL2', 'FBLN2', 'TLL1', 'PROS1', 'LRP1B']
PDZ:6:k	43	33	28	32	5.12768	19456	0.016438	0.0322248	82	388	700	19	['LNX1', 'MAGI2', 'MAGI3', 'RHPN1', 'INADL', 'TJP2', 'GIPC3', 'DLG4', 'MPP4', 'RGS3', 'MAGI1', 'MPDZ', 'PDZD3', 'FRMPD2', 'PDZK1', 'GRASP', 'PARD3', 'SIPA1', 'TJP1']
Pkinase_Tyr:247:p	43	33	33	32	4.27511	19456	0.016438	0.0322248	260	1213	1264	23	['TESK1', 'DDR2', 'PTK2B', 'FES', 'ROR2', 'RET', 'ROR1', 'RIPK2', 'PDGFRA', 'IGF1R', 'FGFR1', 'TGFBR2', 'HCK', 'ACVR1C', 'EPHA4', 'EPHA5', 'EPHA1', 'EPHB1', 'DSTYK', 'EPHB2', 'EPHA7', 'KIT', 'BMX']
zf-C2H2_4:12:s	58	47	51	43	5.0784	19456	0.016581	0.0324916	24	1179	977	36	['ZNF57', 'ZNF136', 'ZNF408', 'ZNF124', 'ZSCAN10', 'ZNF676', 'OVOL2', 'ZNF556', 'ZNF699', 'ZNF823', 'OSR2', 'KLF13', 'ZNF441', 'GFI1B', 'GTF3A', 'ZNF264', 'ZNF238', 'ZNF69', 'ZNF278', 'ZNF672', 'ZNF557', 'ZNF700', 'PATZ1', 'ZNF236', 'ZNF317', 'ZNF711', 'ZNF526', 'ZNF77', 'ZNF644', 'ZNF791', 'VEZF1', 'IKZF4', 'ZNF564', 'SP1', 'ZNF878', 'ZNF668']
zf-met:14:t	41	31	39	31	5.77547	19456	0.0169054	0.0330576	25	281	426	20	['ZNF600', 'WT1', 'ZNF319', 'ZNF808', 'ZNF182', 'ZBTB47', 'BNC2', 'INSM2', 'ZMAT1', 'ZNF235', 'ZNF816', 'ZNF155', 'BCL6', 'ZSCAN5A', 'ZFP161', 'BNC1', 'PRDM5', 'PRDM10', 'ZNF552', 'ZSCAN5B']
Neur_chan_LBD:211:v	31	22	26	22	7.59903	19456	0.0169465	0.0330823	216	88	91	12	['GABRB3', 'GABRB1', 'CHRNG', 'CHRNA9', 'CHRNB3', 'GABRA2', 'GABRR1', 'GLRB', 'CHRNA2', 'GABRG2', 'GLRA4', 'GABRG1']
SH2:8:r	31	22	23	22	6.19994	19456	0.0169465	0.0330823	77	215	240	16	['ABL2', 'TNS4', 'PTPN11', 'DAPP1', 'SHE', 'STAP1', 'CLNK', 'FYN', 'PIK3R3', 'ITK', 'SH2D7', 'VAV1', 'GRAP2', 'BLK', 'SH2D2A', 'SRMS']
Laminin_G_2:16:e	31	22	23	22	6.0734	19456	0.0169465	0.0330823	126	111	262	13	['CNTNAP3', 'FAT4', 'NRXN1', 'PROS1', 'LAMA3', 'LAMA5', 'CRB1', 'NRXN2', 'CNTNAP2', 'EGFLAM', 'USH2A', 'CNTNAP1', 'CNTNAP5']
Spectrin:94:e	31	22	27	21	4.68687	19456	0.0169465	0.0330823	105	94	685	10	['SPTBN5', 'SPTBN2', 'MACF1', 'ACTN2', 'SYNE2', 'SPTB', 'SPTBN1', 'KALRN', 'DST', 'TRIO']
SH2:12:e	33	24	23	24	6.29013	19456	0.0171081	0.0333139	77	215	240	20	['SYK', 'SOCS1', 'PIK3R2', 'CRKL', 'STAT3', 'ABL2', 'PIK3R1', 'SHB', 'CSK', 'ITK', 'SHC4', 'SOCS4', 'SH2D1A', 'VAV3', 'PTPN11', 'FYN', 'GRAP2', 'CHN1', 'INPP5D', 'ZAP70']
Ras:54:D	33	24	30	24	6.05747	19456	0.0171081	0.0333139	162	274	282	20	['RAB7A', 'RAP1B', 'HRAS', 'NRAS', 'RAB3C', 'RAB27B', 'RAB12', 'RAB22A', 'RAB27A', 'AGAP1', 'RHOC', 'RND1', 'KRAS', 'RHEB', 'RHOA', 'AGAP3', 'RASL10A', 'RHOG', 'RAB7L1', 'RASD2']
PH:59:v	33	24	27	24	5.16912	19456	0.0171081	0.0333139	105	511	522	23	['CADPS', 'ARHGAP22', 'PLEKHA4', 'ARHGEF18', 'ANLN', 'TIAM2', 'SKAP1', 'CADPS2', 'ARAP2', 'APPL2', 'ADAP2', 'VAV1', 'CYTH3', 'PLEKHF1', 'FGD3', 'TIAM1', 'MPRIP', 'APPL1', 'ARHGEF9', 'CYTH1', 'SKAP2', 'PRKD1', 'FGD2']
7tm_1:202:l	73	61	64	61	5.62307	19456	0.0173193	0.0336829	268	839	843	48	['CXCR5', 'HRH3', 'CCR2', 'OPRL1', 'EDNRA', 'CXCR2', 'GPR101', 'PTAFR', 'FFAR2', 'CCR3', 'CYSLTR2', 'GPR171', 'GPER', 'NMUR1', 'P2RY1', 'HTR5A', 'F2RL1', 'GALR1', 'S1PR4', 'LPAR1', 'HTR4', 'QRFPR', 'GPR18', 'GPR32', 'GPR151', 'GPR83', 'GPR4', 'FPR1', 'TRHR', 'OPRK1', 'PTGFR', 'GPR21', 'GPR87', 'GPBAR1', 'GPR25', 'LPAR5', 'RXFP3', 'F2R', 'TBXA2R', 'TAAR5', 'GPR139', 'OPRD1', 'CNR1', 'HTR1B', 'NPFF…
PDZ:13:G	53	42	37	40	5.42934	19456	0.0173751	0.0337773	82	388	700	26	['NOS1', 'PICK1', 'GIPC3', 'DLG2', 'PDZRN4', 'MAGI2', 'MPDZ', 'PARD3B', 'PDZD7', 'MAGI1', 'LRRC7', 'MPP4', 'LIMK1', 'RAPGEF6', 'RIMS1', 'PDZRN3', 'MAGI3', 'SYNPO2', 'PTPN13', 'SYNJ2BP', 'MPP7', 'SNTB1', 'CASK', 'SNTG1', 'GIPC1', 'LNX2']
Ig_2:70:e	56	45	41	42	4.27348	19456	0.0175164	0.0340093	79	811	1648	23	['SIGLEC7', 'FCRL1', 'IGSF1', 'SIGLEC1', 'KIRREL3', 'PSG6', 'CEACAM1', 'MALT1', 'PSG5', 'PSG4', 'PSG8', 'FCRL5', 'CNTN5', 'CEACAM8', 'LAIR2', 'PSG2', 'LILRB2', 'FCRLB', 'PSG9', 'LILRB4', 'LILRA1', 'GP6', 'FCGR2A']
CUB:38:s	56	45	39	45	6.42083	19456	0.0175164	0.0340093	110	128	372	17	['TLL2', 'CSMD2', 'CUBN', 'TNFAIP6', 'NRP2', 'OVCH1', 'TLL1', 'CSMD3', 'CDCP2', 'MASP1', 'SCUBE2', 'MASP2', 'SEZ6L2', 'BMP1', 'DMBT1', 'LRP10', 'SEZ6L']
PH:49:s	56	45	38	44	5.93208	19456	0.0175164	0.0340093	105	511	522	28	['BTK', 'GRB10', 'SH2B1', 'FGD2', 'PLEKHA7', 'VAV1', 'PLEKHF2', 'DNM2', 'DOCK10', 'ARHGEF9', 'DOK1', 'AKT3', 'CYTH3', 'TRIOBP', 'ARHGEF18', 'PLEKHD1', 'ASAP3', 'VEPH1', 'PLEKHF1', 'ARAP3', 'PRKD1', 'RALGPS1', 'ADRBK1', 'SWAP70', 'PLEK', 'GAB4', 'ARAP2', 'ACAP2']
RRM_1:52:A	59	48	45	46	5.30735	19456	0.0176109	0.0341785	70	540	848	30	['HNRNPM', 'RBM45', 'NCL', 'SRSF1', 'CNOT4', 'CELF6', 'RBMS3', 'SREK1', 'U2AF2', 'PABPC5', 'ELAVL4', 'SART3', 'HNRNPA2B1', 'GRSF1', 'POLDIP3', 'TARDBP', 'HNRNPA1L2', 'FLJ20273', 'PTBP1', 'CELF1', 'NONO', 'THOC4', 'RBM47', 'RBM4B', 'SRSF3', 'G3BP1', 'SYNCRIP', 'DNAJC17', 'PABPC1L', 'CELF4']
Pkinase_Tyr:229:e	44	34	35	34	4.30828	19456	0.0179046	0.0347196	260	1213	1264	25	['INSRR', 'EPHB3', 'TXK', 'TIE1', 'MATK', 'GUCY2D', 'FGFR3', 'EPHA3', 'EPHA5', 'MAP3K7', 'NTRK1', 'ALK', 'BMX', 'EGFR', 'EPHA2', 'JAK3', 'ROS1', 'FLT4', 'GUCY2C', 'YES1', 'FGR', 'ERBB3', 'NPR1', 'LIMK1', 'ERBB4']
I-set:45:q	171	159	131	148	4.6787	19456	0.0183086	0.0354586	90	839	3800	47	['TTN', 'CNTN4', 'ROBO4', 'ROR1', 'FLT1', 'SDK2', 'MYPN', 'MYBPC3', 'PTPRD', 'CNTN6', 'L1CAM', 'HMCN1', 'WFIKKN2', 'UNC5A', 'OBSCN', 'NCAM2', 'UNC5C', 'CDON', 'MYBPC2', 'DSCAML1', 'MUSK', 'KIRREL', 'LRFN5', 'NTM', 'IGDCC3', 'LRRN1', 'LRFN4', 'NRCAM', 'CHL1', 'PXDN', 'KIRREL2', 'SIGLEC1', 'CNTN5', 'FGFR3', 'CNTN3', 'MYOM3', 'MYOM1', 'HSPG2', 'DCC', 'NEO1', 'OBSL1', 'DSCAM', 'ROR2', 'OPCML', 'MDGA2…
Nebulin:12:s	60	49	25	48	6.31805	19456	0.018709	0.0361739	29	13	428	3	['NEB', 'NRAP', 'NEBL']
7tm_4:13:l	94	82	90	80	6.88067	19456	0.0190724	0.0367543	280	469	454	74	['OR1C1', 'OR1G1', 'OR4N4', 'OR4C5', 'OR5H2', 'OR4D6', 'OR4S2', 'OR2L1P', 'OR10V1', 'OR10K2', 'OR2M2', 'OR5I1', 'OR6C75', 'OR2T1', 'OR2T4', 'OR6C6', 'OR11L1', 'OR52N2', 'OR5K1', 'OR2W1', 'OR6C4', 'OR5B12', 'OR2D3', 'OR4K2', 'OR9Q1', 'OR4C46', 'OR52B6', 'OR10AG1', 'OR4A16', 'OR1E2', 'OR2V2', 'OR5D14', 'OR52N1', 'OR2G3', 'OR5M8', 'OR10J1', 'OR5P2', 'OR1A1', 'OR52N5', 'OR5A2', 'OR51S1', 'OR2T8', 'OR…
SH3_1:36:r	34	25	25	25	4.93403	19456	0.0192366	0.0370553	48	489	633	14	['SH3PXD2B', 'HCLS1', 'TEC', 'ITSN2', 'SKAP2', 'TP53BP2', 'NCK1', 'SORBS2', 'CD2AP', 'GRAP2', 'EPS8', 'NGEF', 'PACSIN2', 'BTK']
Ion_trans:197:d	67	56	49	55	5.64318	19456	0.0194699	0.0374892	245	359	763	30	['CACNA1H', 'CACNA1A', 'SCN11A', 'RYR1', 'TRPV4', 'KCNG1', 'CACNA1G', 'SCN9A', 'KCNA5', 'CNGA2', 'CACNA1S', 'CACNA1C', 'TRPV3', 'SCN2A', 'SCN7A', 'SCN10A', 'KCNA4', 'TRPC3', 'KCNG2', 'SCN1A', 'SCN5A', 'KCNMA1', 'SCN4A', 'CACNA1B', 'KCNF1', 'KCNV2', 'HCN4', 'TRPM3', 'TRPV6', 'SCN8A']
Pkinase_Tyr:258:e	32	23	25	23	3.84885	19456	0.0195412	0.0375953	260	1213	1264	19	['FGFR4', 'HCK', 'BMPR1B', 'NTRK2', 'EPHA7', 'EPHA4', 'PTK2B', 'DDR1', 'ACVR1C', 'AXL', 'FLT4', 'TYK2', 'BRAF', 'KDR', 'ROS1', 'ITK', 'MUSK', 'ERBB2', 'FLT3']
ig:60:s	32	23	22	23	3.07983	19456	0.0195412	0.0375953	87	1005	2154	14	['TIE1', 'CEACAM1', 'FCRL3', 'BOC', 'CXADR', 'KIR2DL3', 'LILRA2', 'SIGLEC6', 'FLT1', 'KDR', 'FGFR1', 'CD33', 'VCAM1', 'VSIG10']
RhoGEF:87:k	25	17	18	17	6.11701	19456	0.0196138	0.0376261	181	200	205	13	['ARHGEF19', 'ARHGEF3', 'ARHGEF9', 'NGEF', 'ARHGEF11', 'TRAD', 'PLEKHG6', 'SOS2', 'PREX2', 'FGD5', 'ARHGEF7', 'KALRN', 'C9orf100']
ABC_tran:87:k	25	17	19	17	6.18916	19456	0.0196138	0.0376261	137	141	195	10	['ABCC10', 'ABCG2', 'ABCC9', 'ABCD2', 'ABCB4', 'ABCB5', 'ABCA9', 'ABCC8', 'ABCA10', 'ABCA8']
SPRY:38:g	25	17	22	17	6.42145	19456	0.0196138	0.0376261	120	148	166	16	['TRIM58', 'RYR2', 'LOC493829', 'TRIM6', 'RYR1', 'HNRNPUL2', 'TRIM22', 'SPSB2', 'TRIM34', 'TRIM49C', 'TRIML2', 'BTN1A1', 'MID2', 'TRIML1', 'BTNL8', 'SPRYD4']
TIG:34:s	25	17	18	17	6.64674	19456	0.0196138	0.0376261	85	80	142	7	['PLXNB3', 'PLXNA1', 'MET', 'PKHD1', 'PLXNA3', 'PKHD1L1', 'PLXND1']
Cadherin_2:22:d	25	17	22	17	6.8078	19456	0.0196138	0.0376261	83	178	127	14	['PCDHGA1', 'PCDHB5', 'PCDHA6', 'PCDHGA3', 'PCDH10', 'PCDHGA8', 'PCDHB12', 'PCDHA8', 'PCDHB15', 'PCDHB6', 'PCDHB7', 'PCDHGA6', 'PCDHA13', 'PCDHB4']
V-set:102:s	25	17	23	17	4.66206	19456	0.0196138	0.0376261	109	958	562	14	['VSIG4', 'BTNL2', 'BCAN', 'CXADR', 'SIGLEC6', 'SIRPD', 'CD48', 'SCN3B', 'HAVCR2', 'MPZL1', 'MXRA8', 'TREM1', 'IGSF8', 'CD300LD']
Homeobox:13:e	48	38	44	38	6.02335	19456	0.0201412	0.0385425	57	381	420	35	['LASS2', 'PITX2', 'HOXC5', 'ALX4', 'LASS3', 'SATB2', 'CDX1', 'PBX3', 'HOXD8', 'HMX2', 'ZFHX3', 'HOXA13', 'SATB1', 'ZHX2', 'ZFHX4', 'HOXD11', 'ZHX1', 'HOXD10', 'HOXB8', 'DLX4', 'HOXA4', 'HOXC9', 'LMX1A', 'LHX4', 'HOXA10', 'PROP1', 'CUX2', 'GSX2', 'POU4F2', 'BARX2', 'VENTX', 'VSX1', 'POU4F3', 'ONECUT1', 'LHX9']
zf-met:5:l	48	38	38	36	6.00288	19456	0.0201412	0.0385425	25	281	426	26	['ZNF530', 'ZNF155', 'PRDM5', 'ZNF236', 'SALL3', 'ZSCAN5B', 'ZNF454', 'SCAPER', 'SALL1', 'ZNF579', 'ZNF385D', 'ZMAT3', 'BNC1', 'ZNF346', 'MAZ', 'ZNF816', 'ZNF701', 'ZNF385B', 'ZNF574', 'ZSCAN5C', 'ZSCAN5A', 'ZBTB34', 'ZFP64', 'ZFHX4', 'PRDM10', 'ZBTB49']
LRR_8:6:L	48	38	43	38	4.71522	19456	0.0201412	0.0385425	61	364	1040	27	['LRCH2', 'LGR5', 'LRIG2', 'CPN2', 'RXFP2', 'LRIG1', 'LRRC19', 'LRRC33', 'PXDNL', 'RTN4R', 'PODN', 'LRRTM2', 'LRRTM1', 'SLIT2', 'LRIG3', 'LRRC8E', 'SLITRK1', 'LRRN3', 'TLR3', 'LRRC15', 'TLR6', 'AMIGO3', 'LRFN1', 'GP1BA', 'LGR6', 'LRRC32', 'LRRIQ4']
Ldl_recept_b:12:a	27	19	26	18	6.49813	19456	0.0204953	0.0390916	42	28	170	7	['VLDLR', 'LRP6', 'LRP1B', 'LRP4', 'LRP2', 'NID2', 'LRP1']
SRCR:37:r	27	19	25	19	5.8307	19456	0.0204953	0.0390916	100	56	270	14	['LOXL2', 'CD163', 'SRCRB4D', 'CD163L1', 'CFI', 'LOXL3', 'LOXL4', 'PRSS12', 'CD5L', 'DMBT1', 'SCARA5', 'MARCO', 'HHIPL1', 'LGALS3BP']
Kinesin:140:y	27	19	21	19	7.1796	19456	0.0204953	0.0390916	333	104	106	10	['KIF17', 'KIF3C', 'KIF13A', 'KIF3A', 'KIF1B', 'KIF18A', 'KIF13B', 'KIF7', 'KIFC1', 'KIF5A']
Laminin_G_2:53:g	27	19	25	19	5.87409	19456	0.0204953	0.0390916	126	111	262	10	['CELSR3', 'CNTNAP1', 'CRB1', 'FAT4', 'CNTNAP5', 'CNTNAP2', 'CRB2', 'USH2A', 'SLIT1', 'GAS6']
Pkinase_Tyr:114:A	27	19	18	19	3.60374	19456	0.0204953	0.0390916	260	1213	1264	16	['DSTYK', 'TESK1', 'EPHA5', 'ABL1', 'MAP3K10', 'EGFR', 'MST1R', 'FLT1', 'FGFR2', 'LCK', 'ANKK1', 'MAP3K11', 'DDR2', 'JAK2', 'NTRK2', 'LIMK1']
Ig_3:55:g	114	102	75	96	4.61865	19456	0.0207351	0.0395164	79	936	2641	42	['ROBO2', 'CNTN4', 'ROBO3', 'ROBO1', 'IGSF11', 'NEGR1', 'PSG1', 'CNTN6', 'CNTN2', 'FLT1', 'HMCN1', 'SIGLEC11', 'MAG', 'IGSF9', 'KDR', 'MDGA2', 'NPHS1', 'FSTL4', 'NRCAM', 'FGFR2', 'PSG2', 'DSCAML1', 'DSCAM', 'MUSK', 'PTPRD', 'LRIT2', 'NCAM2', 'CNTN5', 'VCAM1', 'CADM2', 'IGSF10', 'FGFRL1', 'SDK2', 'CEACAM5', 'L1CAM', 'CNTN3', 'ROBO4', 'BOC', 'LRIG2', 'MDGA1', 'FCER1A', 'OBSL1']
7tm_1:169:r	101	89	77	89	6.09145	19456	0.0210472	0.0400783	268	839	843	48	['CCKBR', 'PPYR1', 'GPR119', 'P2RY1', 'HTR1A', 'GPR174', 'NPSR1', 'FPR3', 'HTR1F', 'GPR161', 'CXCR1', 'CMKLR1', 'NPBWR2', 'GPR32', 'GPR37L1', 'GALR2', 'ADRA2C', 'S1PR1', 'CXCR2', 'MC4R', 'CCR7', 'NPY2R', 'LPAR3', 'HCRTR2', 'F2RL2', 'FFAR1', 'DRD5', 'OPRM1', 'GPR142', 'PTGFR', 'HTR5A', 'ADRB1', 'BRS3', 'OPRL1', 'GPR152', 'HCRTR1', 'NMUR2', 'GHSR', 'HTR2B', 'GPR21', 'CYSLTR2', 'RXFP3', 'RXFP4', 'GP…
PH:63:d	37	28	31	28	5.33418	19456	0.0211247	0.0401767	105	511	522	25	['MPRIP', 'TRIOBP', 'SH2B3', 'RASA2', 'ARHGEF9', 'RASA1', 'PLEKHA4', 'GRB14', 'GAB4', 'FARP1', 'PLEKHA7', 'GAB1', 'GAB3', 'ACAP1', 'DOK1', 'TEC', 'VAV1', 'PLEKHF1', 'FGD2', 'ADAP2', 'SH3BP2', 'FGD6', 'PLEK', 'RTKN2', 'FGD1']
CUB:57:D	62	51	42	51	6.56767	19456	0.0211173	0.0401767	110	128	372	17	['TNFAIP6', 'CSMD3', 'PCOLCE2', 'CSMD2', 'TLL2', 'TMPRSS15', 'BMP1', 'MASP1', 'OVCH1', 'NRP1', 'C1RL', 'SCUBE1', 'TLL1', 'NETO1', 'CUBN', 'LRP3', 'CDCP2']
Pkinase:42:e	62	51	53	50	4.77032	19456	0.0211173	0.0401767	264	1221	1293	25	['SIK1', 'MAST1', 'PSKH2', 'NEK4', 'RPS6KA2', 'MAPK9', 'MAP4K2', 'STK32C', 'BUB1', 'RPS6KA3', 'CDK13', 'MOS', 'CSNK2A1', 'HIPK3', 'DCLK2', 'MAPK13', 'CAMK2B', 'SGK2', 'MAST3', 'STK17B', 'WNK2', 'CHUK', 'CDK9', 'NEK9', 'PIM1']
7tm_4:84:v	69	58	66	58	6.43461	19456	0.0214636	0.040762	280	469	454	45	['OR6Y1', 'OR5T3', 'OR6T1', 'OR52N1', 'OR10T2', 'OR5H14', 'OR52L1', 'OR56B1', 'OR9Q2', 'OR11L1', 'OR5L2', 'OR4K15', 'OR6C6', 'OR4S1', 'OR2M3', 'OR2F2', 'OR8H1', 'OR2AJ1', 'OR8K1', 'OR2G3', 'OR51A7', 'OR5H2', 'OR5D18', 'OR14A16', 'OR5D16', 'OR5B3', 'OR10H5', 'OR4K13', 'OR8D1', 'OR4N2', 'OR6N1', 'OR6C2', 'OR5K4', 'OR4Q3', 'OR5B2', 'OR4A5', 'OR4A16', 'OR11G2', 'OR2B3', 'OR6C65', 'OR9I1', 'OR8B12', '…
SH3_1:30:d	35	26	26	26	4.97585	19456	0.0215835	0.0408988	48	489	633	19	['ITSN2', 'ARHGAP4', 'SGSM3', 'NCF2', 'SRGAP1', 'SLA', 'STAC', 'LYN', 'STAM', 'CD2AP', 'STAC3', 'TRIP10', 'TP53BP2', 'HCLS1', 'SH3RF1', 'SORBS3', 'SH3RF2', 'NCK2', 'STAM2']
SRCR:68:r	35	26	29	26	6.2051	19456	0.0215835	0.0408988	100	56	270	11	['SRCRB4D', 'CD163L1', 'MSR1', 'CD5L', 'SSC5D', 'DMBT1', 'PRSS12', 'CD163', 'MARCO', 'LOXL3', 'LOXL4']
Ion_trans:33:t	35	26	29	26	4.70637	19456	0.0215835	0.0408988	245	359	763	19	['KCNQ5', 'KCNQ1', 'CACNA1E', 'TRPC6', 'KCNS3', 'SCN1A', 'KCNG2', 'KCNB2', 'KCNA2', 'NALCN', 'KCNH8', 'KCNC3', 'TRPV6', 'KCNA10', 'KCNB1', 'KCNA4', 'SCN11A', 'KCNA1', 'KCNU1']
P53:61:s	49	39	14	39	9.72295	19456	0.0216605	0.0410113	196	33	33	1	['TP53']
Pkinase:62:r	81	70	60	70	5.15597	19456	0.0225843	0.0426215	264	1221	1293	47	['STK25', 'SIK2', 'AKT3', 'MOS', 'AMHR2', 'MARK2', 'CSNK1G1', 'GSK3B', 'NUAK1', 'CAMK1G', 'MAP3K2', 'GRK7', 'CSNK1D', 'NEK1', 'MAP3K6', 'PKMYT1', 'MAP2K1', 'CAMK2D', 'AURKB', 'SIK1', 'MAPK12', 'MKNK2', 'CAMK1', 'PRKACB', 'WNK3', 'CAMK2B', 'RIPK3', 'STK36', 'MAPK3', 'GAK', 'PAK2', 'CIT', 'NEK7', 'TBCK', 'AURKC', 'MGC42105', 'ADRBK2', 'CDKL3', 'LRRK2', 'CSNK1A1L', 'CLK2', 'STK32C', 'PIM1', 'STK11',…
Y_phosphatase:5:n	21	14	13	14	6.00579	19456	0.0228025	0.0428769	235	152	186	8	['PTPRA', 'PTPRB', 'PTPRU', 'PTPN6', 'PTPRK', 'PTPN7', 'PTPN2', 'PTPN20A']
Helicase_C:51:p	21	14	20	14	5.91559	19456	0.0228025	0.0428769	111	196	198	13	['DDX5', 'FANCM', 'DDX3X', 'HLTF', 'CHD7', 'DDX59', 'SNRNP200', 'EP400', 'DHX30', 'HFM1', 'DICER1', 'CHD6', 'EIF4A2']
ANF_receptor:141:e	21	14	15	14	7.03715	19456	0.0228025	0.0428769	352	92	91	11	['GRM6', 'GRIK4', 'GRM8', 'TAS1R3', 'GRIA2', 'GABBR1', 'GRM3', 'TAS1R2', 'GRM4', 'GRIK5', 'GRM1']
ANF_receptor:314:k	21	14	14	14	7.03715	19456	0.0228025	0.0428769	352	92	91	8	['GRIK2', 'GABBR1', 'GRID1', 'NPR2', 'GRIK3', 'GRM5', 'GRM6', 'GRID2']
VWA:131:g	21	14	19	14	5.59075	19456	0.0228025	0.0428769	175	144	248	11	['COL6A6', 'VIT', 'MATN4', 'CACNA2D1', 'ITIH5L', 'ITIH1', 'COL12A1', 'ITIH4', 'VWA1', 'COL6A3', 'VWF']
BTB_2:46:f	21	14	21	14	7.33549	19456	0.0228025	0.0428769	94	74	74	5	['KCNA4', 'KCTD3', 'KCTD6', 'KCNV2', 'KCNC1']
Filamin:99:g	21	14	14	14	5.29702	19456	0.0228025	0.0428769	103	28	304	4	['FLNC', 'FLNB', 'TRIM45', 'FLNA']
IQ:3:a	21	14	21	14	5.50603	19456	0.0228025	0.0428769	21	109	263	6	['ASPM', 'MYO10', 'IQCB1', 'IQGAP2', 'IQCF3', 'MYO1A']
Ig_2:43:s	47	37	31	37	4.02072	19456	0.0230469	0.0432664	79	811	1648	18	['IL1RL2', 'FCRL5', 'FCRL3', 'HSPG2', 'SIGLEC10', 'PSG2', 'FCGR2A', 'PSG4', 'PSG1', 'SIGLEC12', 'PSG8', 'IGSF1', 'CEACAM6', 'FCRL4', 'SIGLEC1', 'FCRLA', 'SIGLEC14', 'TARM1']
V-set:9:a	50	40	32	40	5.66206	19456	0.0232863	0.0436103	109	958	562	25	['VSTM2B', 'CD300C', 'BTNL3', 'TREM2', 'PSG2', 'IGSF3', 'PSG1', 'BTNL2', 'PSG8', 'VSTM2L', 'TIGIT', 'LY6G6F', 'PSG3', 'FAIM3', 'CD226', 'SIRPB1', 'CD300LD', 'SIGLEC12', 'NCAN', 'SIGLEC6', 'SCN1B', 'SCN3B', 'SIGLEC10', 'CEACAM7', 'VSIG4']
Ion_trans:154:g	50	40	34	40	5.22095	19456	0.0232863	0.0436103	245	359	763	17	['SCN3A', 'CACNA1A', 'TRPV4', 'CACNA1D', 'HCN1', 'CACNA1C', 'KCNH1', 'CACNA1S', 'KCNU1', 'TRPV1', 'SCN11A', 'CACNA1I', 'CACNA1F', 'SCN5A', 'HCN4', 'NALCN', 'CACNA1B']
Homeobox:41:e	50	40	46	39	6.08224	19456	0.0232863	0.0436103	57	381	420	35	['ISL1', 'POU6F2', 'HOXD13', 'NKX3-1', 'PHOX2A', 'ALX1', 'HOXC4', 'BARHL1', 'NOTO', 'POU4F1', 'HOXD12', 'VSX1', 'PAX6', 'NKX3-2', 'NKX6-1', 'POU5F1', 'HOXD9', 'LASS5', 'POU2F1', 'HOXC9', 'OTX2', 'LASS3', 'HOXD1', 'NOBOX', 'DLX2', 'LHX5', 'HOXB1', 'VENTX', 'GSC', 'BSX', 'HOXB7', 'TLX2', 'ZFHX2', 'MEOX1', 'HOXB5']
BTB:100:k	26	18	25	18	5.9522	19456	0.0234125	0.043777	111	223	239	19	['KLHL9', 'GZF1', 'ZBTB32', 'BTBD6', 'KLHL14', 'KBTBD4', 'HIC2', 'ENC1', 'ZBTB6', 'KLHL8', 'KBTBD6', 'SLX4', 'ZBTB1', 'KLHL3', 'RHOBTB2', 'CCIN', 'ZBTB46', 'KBTBD5', 'ZBTB39']
Cadherin_2:53:g	26	18	16	18	6.86438	19456	0.0234125	0.043777	83	178	127	13	['PCDHGB2', 'PCDHAC1', 'PCDHGC3', 'PCDHA3', 'PCDHB2', 'PCDHA1', 'PCDHA11', 'PCDHB12', 'PCDHB1', 'PCDHGA5', 'PCDHA4', 'PCDHGA6', 'PCDH10']
Histone:115:a	26	18	26	18	7.89887	19456	0.0234125	0.043777	132	61	62	13	['H3F3C', 'HIST2H2BE', 'H2AFV', 'HIST1H2AH', 'H2AFZ', 'HIST1H2BE', 'H3F3A', 'HIST3H2A', 'HIST1H2AC', 'HIST1H2AM', 'HIST1H2BA', 'HIST1H3J', 'HIST2H2AB']
Pkinase:19:v	82	71	56	70	5.17367	19456	0.0234513	0.043831	264	1221	1293	43	['CAMKK2', 'AKT2', 'MAST4', 'PKMYT1', 'MAP3K6', 'PRKCA', 'BUB1', 'ULK2', 'PRKCI', 'MAPK10', 'PAK4', 'AKT3', 'CDK4', 'IRAK2', 'MAP3K4', 'DAPK2', 'MAP2K1', 'MAPK4', 'PRKCZ', 'CLK4', 'TBK1', 'RPS6KA1', 'CDK18', 'STK36', 'STK25', 'MAST2', 'STRADB', 'SRPK3', 'CDC42BPG', 'GRK6', 'TNIK', 'AURKC', 'ACVR1B', 'DAPK1', 'CDK8', 'TTBK1', 'MAP3K15', 'IRAK3', 'RPS6KA4', 'MYLK4', 'CAMKV', 'STK16', 'STK17B']
KRAB:12:t	56	46	49	46	5.79257	19456	0.0235162	0.0438995	42	570	575	37	['ZFP14', 'ZNF222', 'ZNF560', 'ZNF114', 'ZNF614', 'ZFP28', 'ZNF554', 'ZNF34', 'ZNF677', 'ZNF549', 'ZNF556', 'ZNF354C', 'ZNF167', 'ZNF483', 'ZNF611', 'ZNF679', 'ZNF681', 'ZNF302', 'ZNF92', 'POGK', 'ZNF585B', 'ZNF300', 'ZNF665', 'ZNF184', 'ZNF773', 'ZNF20', 'ZNF354A', 'ZNF471', 'ZNF780B', 'ZNF419', 'ZNF546', 'ZNF169', 'ZNF582', 'ZNF584', 'ZNF567', 'ZNF420', 'ZNF324']
7tm_1:171:v	56	46	51	42	5.2406	19456	0.0235162	0.0438995	268	839	843	35	['OPRK1', 'GPR61', 'RHO', 'OXGR1', 'HTR4', 'GPR152', 'MRGPRX4', 'GPR3', 'CCR6', 'GPR52', 'TRHR', 'ADRA2C', 'C5AR1', 'HRH1', 'FFAR3', 'GPR12', 'GPR85', 'LHCGR', 'DRD2', 'LPAR1', 'MC4R', 'CXCR1', 'HRH4', 'HRH2', 'CHRM3', 'S1PR5', 'PTGFR', 'SSTR1', 'GPR141', 'LPAR6', 'GNRHR', 'OPN4', 'CCR1', 'P2RY8', 'P2RY13']
BTB:53:e	28	20	22	20	6.05912	19456	0.0235887	0.0439994	111	223	239	16	['ZNF295', 'ZNF278', 'ZBTB2', 'KLHL5', 'ZBTB7B', 'BTBD3', 'KLHL6', 'KLHL38', 'ZNF238', 'PATZ1', 'KLHL30', 'KBTBD3', 'KBTBD6', 'KLHL1', 'ENC1', 'MYNN']
EF-hand_7:5:k	28	20	19	20	6.17862	19456	0.0235887	0.0439994	71	289	220	11	['PPP3R1', 'CETN1', 'GUCA1A', 'EFCAB1', 'CABP2', 'CAPSL', 'CALN1', 'PPP2R3A', 'KCNIP2', 'MCC', 'CETN2']
fn3:53:r	144	133	106	129	4.76366	19456	0.0241001	0.0448454	85	419	3017	54	['COL20A1', 'CNTN4', 'COL12A1', 'TNN', 'PRTG', 'PTPRD', 'CHL1', 'TTN', 'EPHB4', 'SDK1', 'DSCAML1', 'COL14A1', 'FN1', 'IGDCC4', 'TEK', 'TNR', 'FNDC3A', 'BOC', 'CDON', 'ANKFN1', 'SDK2', 'USH2A', 'MYOM1', 'ROBO3', 'CNTFR', 'IL7R', 'EPHA4', 'KAL1', 'ROBO1', 'EPHA3', 'PTPRB', 'IL6ST', 'LRRN3', 'AXL', 'IGFN1', 'PTPRF', 'TNC', 'L1CAM', 'EPHA1', 'NFASC', 'PHYHIPL', 'EPHA8', 'SORL1', 'DCC', 'CNTN2', 'NPHS…
Laminin_G_2:22:a	36	27	23	26	6.28913	19456	0.0241513	0.0449049	126	111	262	10	['EGFLAM', 'CNTNAP1', 'LAMA5', 'CRB1', 'USH2A', 'CNTNAP5', 'LAMA2', 'CNTNAP2', 'NRXN1', 'CNTNAP3']
Cadherin_C_2:20:t	36	27	30	26	8.1131	19456	0.0241513	0.0449049	85	86	74	16	['PCDHB4', 'PCDHB13', 'PCDHGB3', 'PCDHGB1', 'PCDHB7', 'PCDHB14', 'PCDHA9', 'PCDHGA3', 'PCDHB3', 'PCDHB5', 'PCDHGB2', 'PCDHB6', 'PCDHGB6', 'PCDHA5', 'PCDHA4', 'PCDHB8']
7tm_4:153:e	184	174	157	164	7.84964	19456	0.0241694	0.0449205	280	469	454	113	['OR6B2', 'OR4C6', 'OR8H3', 'OR6A2', 'OR3A2', 'OR4P4', 'OR1L3', 'OR11H6', 'OR2A12', 'OR6N1', 'OR1L8', 'OR2V2', 'OR1Q1', 'OR51Q1', 'OR8K1', 'OR10K1', 'OR1N1', 'OR6C70', 'OR51A2', 'OR6P1', 'OR6C74', 'OR56A1', 'OR2T8', 'OR4D2', 'OR10AG1', 'OR1F1', 'OR52I2', 'OR1A1', 'OR5J2', 'OR8B12', 'OR6C3', 'OR2M2', 'OR11H4', 'OR7E24', 'OR4X1', 'OR5B12', 'OR4C46', 'OR4N5', 'OR10Q1', 'OR51A4', 'OR5AS1', 'OR10G9', …
Laminin_G_2:6:p	41	32	28	31	6.47676	19456	0.0245405	0.0455737	126	111	262	13	['NRXN1', 'PROS1', 'CNTNAP5', 'NELL2', 'NRXN2', 'CRB1', 'CNTNAP2', 'LAMA2', 'FAT', 'LAMA3', 'CNTNAP3', 'CELSR2', 'FAT4']
Spectrin:52:a	41	32	29	32	5.09022	19456	0.0245405	0.0455737	105	94	685	13	['SPTBN2', 'ACTN2', 'ACTN1', 'SPTBN5', 'SPTBN1', 'SPTBN4', 'SPTB', 'SPTAN1', 'UTRN', 'MACF1', 'DST', 'CCDC141', 'ACTN4']
CUB:22:e	54	44	38	43	6.36836	19456	0.0249642	0.0463082	110	128	372	11	['TNFAIP6', 'CSMD3', 'LRP12', 'TLL1', 'TMPRSS15', 'CUBN', 'CSMD2', 'TLL2', 'PDGFC', 'DMBT1', 'PCOLCE2']
BTB:35:p	39	30	33	29	6.53716	19456	0.025505	0.0471579	111	223	239	25	['ZBTB34', 'ZBTB12', 'KLHL13', 'KLHL30', 'KLHL18', 'ZBTB46', 'PATZ1', 'KLHL3', 'KLHL22', 'KLHL32', 'ZNF295', 'BTBD7', 'ZBTB9', 'KLHL36', 'ZFP161', 'BTBD2', 'KLHL1', 'SPOP', 'KLHL20', 'KEAP1', 'ZNF278', 'KLHL7', 'ENC1', 'SLX4', 'KLHL28']
Mito_carr:88:t	39	30	35	30	6.41013	19456	0.025505	0.0471579	97	100	261	10	['SLC25A35', 'SLC25A38', 'SLC25A2', 'SLC25A28', 'MCART2', 'SLC25A14', 'SLC25A10', 'SLC25A5', 'SLC25A6', 'SLC25A34']
hEGF:19:p	58	48	43	48	5.65526	19456	0.0262879	0.0485668	22	104	655	17	['DLL3', 'CRB1', 'NOTCH1', 'NOTCH2', 'MEGF11', 'DLL1', 'CRB2', 'DNER', 'FAT4', 'SLIT1', 'MEGF10', 'SNED1', 'NOTCH3', 'FBN3', 'GAS6', 'SLIT2', 'NOTCH4']
7tm_1:53:g	85	74	74	69	5.84263	19456	0.0263112	0.0485894	268	839	843	53	['OPRL1', 'LPAR1', 'GPR182', 'LPAR4', 'CXCR4', 'HTR2A', 'MRGPRX1', 'CCR7', 'GHSR', 'CCR2', 'GPR84', 'DRD5', 'GPR139', 'GPR148', 'RXFP4', 'CCR9', 'FPR1', 'GPR45', 'QRFPR', 'HCRTR2', 'PROKR2', 'MCHR2', 'LHCGR', 'HRH4', 'HTR5A', 'GALR2', 'TRHR', 'CMKLR1', 'PTAFR', 'CXCR5', 'CCBP2', 'GPR55', 'NMUR2', 'LPAR3', 'TAAR5', 'P2RY4', 'GPR173', 'NTSR1', 'CCR4', 'ADRA1D', 'BDKRB1', 'OXTR', 'GPR20', 'P2RY8', '…
Pkinase_Tyr:234:e	42	33	31	33	4.24117	19456	0.0265547	0.0489819	260	1213	1264	24	['KDR', 'YES1', 'STYK1', 'ROS1', 'ABL2', 'ZAP70', 'JAK1', 'FES', 'NPR1', 'ITK', 'FGFR1', 'ARAF', 'MAP3K13', 'LCK', 'FGR', 'DDR2', 'FGFR4', 'LIMK1', 'EPHB4', 'PDGFRB', 'JAK2', 'NTRK1', 'PDGFRA', 'MAP3K11']
P53:60:g	42	33	12	33	9.50055	19456	0.0265547	0.0489819	196	33	33	2	['TP53', 'TP63']
Laminin_G_2:35:n	31	23	23	23	6.0734	19456	0.0267956	0.0493703	126	111	262	11	['CNTNAP2', 'NELL2', 'LAMA3', 'LAMA2', 'SLIT1', 'EGFLAM', 'CNTNAP5', 'CRB2', 'NRXN1', 'NRXN3', 'FAT4']
Bromodomain:53:s	29	21	15	21	6.23582	19456	0.0270304	0.0496821	84	143	219	7	['PBRM1', 'KAT2B', 'BRDT', 'ATAD2', 'BRD4', 'BRD7', 'SP100']
VWA:69:d	29	21	25	21	6.05641	19456	0.0270304	0.0496821	175	144	248	12	['COL6A3', 'VWF', 'COL22A1', 'COL14A1', 'COL6A6', 'FLJ35880', 'ANTXR1', 'COL7A1', 'VIT', 'COL12A1', 'ITIH2', 'C2']
Laminin_G_2:116:G	29	21	22	21	5.97719	19456	0.0270304	0.0496821	126	111	262	14	['CNTNAP5', 'PROS1', 'NRXN2', 'COL11A1', 'LAMA3', 'CRB1', 'CNTNAP4', 'FAT3', 'CELSR3', 'CNTNAP1', 'NRXN1', 'GAS6', 'LAMA5', 'LAMA2']
CH:32:r	29	21	20	21	5.93379	19456	0.0270304	0.0496821	109	187	270	11	['ACTN2', 'SPTBN4', 'NAV3', 'ARHGEF6', 'SPTBN2', 'FLNA', 'MICAL2', 'IQGAP3', 'ACTN4', 'FLNC', 'MACF1']
C1_1:41:k	22	15	16	15	6.46231	19456	0.0273458	0.0502024	53	190	142	9	['PRKCB', 'VAV1', 'DGKD', 'DGKG', 'DGKB', 'PRKCG', 'CDC42BPB', 'DGKH', 'PRKD2']
RhoGAP:94:e	22	15	17	15	6.12825	19456	0.0273458	0.0502024	152	178	179	13	['ARHGAP6', 'ARHGAP1', 'ARHGAP17', 'ARHGAP40', 'PIK3R1', 'MYO9A', 'ARHGAP31', 'ARAP2', 'ABR', 'ARHGAP30', 'ARHGAP36', 'ARHGAP35', 'OCRL']
zf-C2H2_4:18:r	59	49	52	47	5.10306	19456	0.0277953	0.0510075	24	1179	977	36	['ZNF530', 'ZNF700', 'ZNF878', 'ZNF679', 'ZNF528', 'RREB1', 'ZBTB17', 'ZNF317', 'ZNF791', 'ZNF264', 'ZNF278', 'GZF1', 'ZNF699', 'ZNF490', 'ZSCAN10', 'ZNF441', 'IKZF4', 'ZNF57', 'GFI1B', 'ZNF672', 'ZNF555', 'ZNF408', 'ZNF436', 'ZNF473', 'ZNF668', 'ZNF440', 'ZNF596', 'PRDM5', 'PATZ1', 'ZNF564', 'ZNF341', 'ZNF492', 'ZNF644', 'ZNF443', 'OVOL2', 'ZNF581']
fn3:68:e	168	158	135	143	4.98605	19456	0.0279818	0.0513091	85	419	3017	45	['TTN', 'ROBO1', 'ROBO2', 'CSF3R', 'TNXB', 'FN1', 'EPHB3', 'NFASC', 'USH2A', 'TIE1', 'CNTN3', 'CRLF1', 'IGDCC3', 'PTPRB', 'L1CAM', 'LRRN4', 'IL27RA', 'TNR', 'LRRN3', 'TEK', 'FNDC1', 'COL14A1', 'EPHA4', 'MYBPC1', 'OSMR', 'SDK1', 'GHR', 'IGFN1', 'TRAD', 'EPHB1', 'PTPRK', 'MYBPC2', 'SDK2', 'EPHA8', 'TNC', 'COL12A1', 'CNTN4', 'AXL', 'FNDC3B', 'NPHS1', 'PTPRD', 'SORL1', 'EPHA1', 'IGDCC4', 'COL7A1']
Trypsin:184:P	43	34	39	33	6.77154	19456	0.0287142	0.0524866	221	210	224	22	['TMPRSS12', 'GZMH', 'PRSS22', 'CFI', 'GZMK', 'PRSS58', 'CORIN', 'TMPRSS5', 'KLK6', 'TMPRSS3', 'TMPRSS6', 'PRSS55', 'PROC', 'PRSS36', 'HGFAC', 'KLK8', 'KLK12', 'F10', 'CTRB1', 'KLK15', 'PRSS21', 'CELA2A']
BTB:27:k	43	34	36	33	6.67803	19456	0.0287142	0.0524866	111	223	239	28	['KLHL3', 'KLHL6', 'ZBTB22', 'KLHL14', 'KBTBD4', 'KLHL38', 'ZBTB20', 'BACH2', 'CCIN', 'KBTBD13', 'NACC1', 'KLHL1', 'KLHL4', 'ZBTB3', 'ZBTB16', 'HIC1', 'KLHL12', 'ZNF295', 'ZBTB7A', 'KLHL10', 'SLX4', 'ZBTB24', 'KLHL11', 'KBTBD12', 'KLHL18', 'ZBTB5', 'BTBD6', 'KLHL7']
PDZ:39:a	46	37	30	37	5.22498	19456	0.0292565	0.053373	82	388	700	23	['PTPN13', 'LIMK2', 'PARD3', 'TJP2', 'GRIP1', 'SNTG1', 'TIAM1', 'SHROOM2', 'SLC9A3R2', 'GIPC3', 'GOPC', 'CYTIP', 'DLG2', 'ARHGEF12', 'RIMS1', 'APBA1', 'PICK1', 'RGS12', 'IL16', 'PARD6A', 'SNTB1', 'DLG4', 'INADL']
Trypsin:30:s	32	24	29	23	6.34527	19456	0.0298611	0.0543695	221	210	224	18	['CFB', 'HGFAC', 'GZMA', 'ST14', 'CELA3A', 'TMPRSS6', 'PRSS27', 'PRSS3', 'TMPRSS11E', 'TMPRSS2', 'CELA2B', 'KLK15', 'C1S', 'F10', 'PRSS1', 'C2', 'PRSS36', 'CTSG']
Ig_3:26:e	131	121	88	111	4.81918	19456	0.0300398	0.0546734	79	936	2641	44	['HEPACAM2', 'CADM3', 'MDGA2', 'PSG4', 'ROBO1', 'PSG2', 'CNTN3', 'IGSF10', 'PTPRD', 'OBSL1', 'ROBO3', 'CNTN5', 'IGSF9', 'HSPG2', 'SIGLEC12', 'PSG1', 'BCAM', 'NPHS1', 'CADM2', 'DSCAM', 'CNTN2', 'FLT1', 'MUSK', 'ROBO2', 'GPA33', 'PDGFRB', 'FLT4', 'LRIG1', 'HMCN1', 'NCAM2', 'FGFRL1', 'NEO1', 'SDK1', 'KDR', 'VSIG4', 'CD22', 'MCAM', 'BOC', 'ICAM5', 'SDK2', 'ROBO4', 'CNTN1', 'PXDNL', 'CEACAM1']
7tm_4:252:l	79	69	78	66	6.62986	19456	0.0301139	0.0547868	280	469	454	56	['OR5H1', 'OR4C13', 'OR6K2', 'OR4C46', 'OR2A4', 'OR5M9', 'OR1L3', 'OR7A17', 'OR4D2', 'OR5AK2', 'OR10T2', 'OR5M11', 'OR4C3', 'OR4K5', 'OR51G2', 'OR5F1', 'OR13C2', 'OR4A15', 'OR5B17', 'OR13C3', 'OR51B6', 'OR14A16', 'OR10Z1', 'OR51E1', 'OR6N2', 'OR5H15', 'OR52E8', 'OR51S1', 'OR13F1', 'OR13C4', 'OR5A2', 'OR51L1', 'OR2M7', 'OR2A5', 'OR5H6', 'OR52N4', 'OR2L3', 'OR10H5', 'OR5K3', 'OR5D16', 'OR6F1', 'OR5…
SRCR:6:s	30	22	26	22	5.9827	19456	0.0308149	0.0559746	100	56	270	7	['CD163', 'SSC5D', 'LOXL4', 'CD163L1', 'CD5L', 'DMBT1', 'CD6']
Lectin_C:9:e	30	22	23	20	6.28473	19456	0.0308149	0.0559746	108	165	219	18	['CLEC9A', 'FREM1', 'CLEC7A', 'REG1B', 'KLRD1', 'COLEC10', 'CLEC12A', 'NCAN', 'COLEC11', 'REG1A', 'CLEC4D', 'MRC2', 'SELL', 'FCER2', 'CLEC19A', 'CLEC12B', 'CLEC4M', 'LY75']
CUB:52:e	30	22	22	22	5.52036	19456	0.0308149	0.0559746	110	128	372	11	['CUBN', 'BMP1', 'TLL2', 'OVCH1', 'ST14', 'SCUBE1', 'DMBT1', 'CDCP2', 'C1S', 'MASP1', 'PDGFD']
Kelch_1:6:g	44	35	40	34	5.94318	19456	0.03102	0.0562799	46	122	407	24	['HCFC1', 'KLHL17', 'KLHL1', 'KLHL13', 'KLHL4', 'KLHL8', 'KLHL25', 'KLHL3', 'KLHL20', 'KLHL15', 'KLHL2', 'KLHL22', 'KLHDC10', 'KBTBD13', 'KLHL14', 'KLHL21', 'KLHL18', 'KBTBD11', 'KLHL24', 'KLHDC8A', 'KLHL12', 'KBTBD10', 'KLHL35', 'KBTBD6']
7tm_1:99:a	72	62	65	60	5.60317	19456	0.0310314	0.0562799	268	839	843	46	['S1PR1', 'APLNR', 'GPR32', 'PTGFR', 'C3AR1', 'DRD5', 'HTR2A', 'PTGER4', 'TAAR5', 'HCRTR1', 'EDNRB', 'CXCR6', 'ADORA1', 'PROKR1', 'PPYR1', 'CCBP2', 'ADRB3', 'FFAR1', 'LPAR2', 'CXCR7', 'P2RY11', 'MTNR1A', 'ADRA1D', 'SSTR1', 'HCRTR2', 'CNR2', 'NPY2R', 'ADRB1', 'GPR4', 'CYSLTR1', 'NPFFR2', 'HTR2C', 'LPAR5', 'NPBWR2', 'UTS2R', 'P2RY10', 'PTGIR', 'LPAR3', 'TBXA2R', 'PROKR2', 'GPR162', 'CMKLR1', 'OXTR'…
Ank_2:24:k	76	66	61	64	4.78401	19456	0.0311784	0.0564805	84	529	1570	43	['ASZ1', 'ANKRD55', 'AGAP2', 'ANKHD1', 'ANKRD22', 'ASB15', 'ANKRD52', 'KIDINS220', 'TRPC6', 'RIPK4', 'RNASEL', 'BARD1', 'DGKZ', 'SNCAIP', 'MYO16', 'TRPA1', 'BCL3', 'ASB9', 'ANKRD42', 'ASB14', 'FEM1A', 'NOTCH1', 'ASB16', 'ANKRD26', 'ASB7', 'RAI14', 'ASAP2', 'TNKS', 'TRPV2', 'ANKRD50', 'ANK2', 'ANKRD39', 'ASB2', 'POTEC', 'ESPNL', 'NOTCH3', 'ANKFY1', 'FANK1', 'ASB5', 'INVS', 'ANKRD30B', 'MIB2', 'NFK…
Pkinase:46:l	80	70	52	68	5.13805	19456	0.0311778	0.0564805	264	1221	1293	30	['ROCK1', 'CDC42BPA', 'LRRK1', 'VRK1', 'TTN', 'CLK1', 'MAPKAPK2', 'PRKD2', 'AURKB', 'CDK14', 'NEK4', 'AURKC', 'CDC42BPB', 'STK38L', 'MAPKAPK5', 'STK32B', 'ROCK2', 'STK16', 'PRKG1', 'MAP2K3', 'MAP2K4', 'NEK1', 'ENSG00000168038', 'PRKD1', 'PHKG2', 'AAK1', 'MAPK13', 'MAP3K2', 'CAMK2A', 'ULK3']
EGF_CA:3:d	123	113	90	108	6.32861	19456	0.0318434	0.0576402	42	189	871	28	['NOTCH3', 'LTBP3', 'NELL2', 'CD93', 'UMODL1', 'CRELD1', 'FBN3', 'NOTCH4', 'FBN1', 'MATN2', 'PROS1', 'LTBP4', 'NELL1', 'LTBP1', 'FBN2', 'HMCN1', 'FBLN5', 'EMR1', 'TLL1', 'FBLN2', 'NOTCH1', 'LRP2', 'LRP1B', 'NOTCH2', 'MATN4', 'SCUBE1', 'SCUBE3', 'LRP1']
[truncated: 120 more rows]

## Sheet: S2
Table S2: domain position mutational enrichment (tissue-level analysis; Binomial Q-val<0.1)
[truncated: 14,136 more rows]

## Sheet: S3
Table S3: domain hotspot mutual exclusivity within pathways (Pancancer; Fischer's and Binomial Q-val<0.1)												1214
			Cancer set					Background model
[truncated: 2,802 more rows]

## Sheet: S4
Table S4: domain hotspot mutual exclusivity within pathways (Tissue-level analysis; Fisher's and Binomial Q-val <0.1)
[truncated: 2,704 more rows]

[truncated: 17 more sheets: S5a, S5b, S6, S7, S8, S9, S10, S11, S12, S13, S14, S15, S16, S17, S18, S19, S20]
